# Supplementary material for: Rare predicted loss-of-function variants of type I IFN immunity genes are associated with life-threatening COVID-19
Source: Genome Med. 2023 Apr 5;15:22. doi: 10.1186/s13073-023-01173-8 (PMC10074346; doi:10.1186/s13073-023-01173-8)
Supplement: Supplementary file 2 — Additional file 2: Table S1. Number of genes tested and Genomic inflation factor for each model and variant set. Table S2. Complete results of the genome-wide burden joint analysis, trans-pipeline meta-analysis and trans-ethnic meta-analysis on rare variants. Table S3. Best results of the genome-wide burden analysis on rare variants under a co-dominant and dominant model. Table S4. TLR7 homozygous and hemizygous variants (AF < 0.01). Table S5. Results of the genome-wide burden analysis on common and rare variants under a co-dominant model. Table S6. Results of the genome-wide burden analyses for the candidate genes identified by GWAS under co-dominant model. Table S7. Characteristics of patients and controls in the full sample and according to the inclusion in the Zhang Q. et al., Science 2020 paper. Table S8. Carriers of rare pLOF/bLOF variants in genes involved in type I IFN immunity to influenza virus. Table S9. Branchpoint variants identified by BPHunter and characteristics of the carriers. Table S10. Age and sex stratified analysis for the 15 type I IFN-related loci. Table S11. Enrichment analysis of rare variants, including missense and inframe variants, in genes involved in type I IFN immunity in the full cohort of 3269 cases and 1373 controls. Table S12. pLI and CoNeS distribution of the analyzed genes. [file 13073_2023_1173_MOESM2_ESM.xlsx]

## Sheet: Table S1
Table S1. Number of genes tested and Genomic inflation factor for each model and variant set
Genetic model	Variant set	Type of variant	Gnomad AF threshold	CADD score > MSC	no. genes testeda	Genomic inflation factor (λ)
						Joint analysis	Trans-pipeline meta-analysis	Trans-ethnic meta-analysis
Co-dominant	1	pLOF	0.01	.	8397	1.03468	1.03251	0.971166
Co-dominant	2	pLOF	0.001	.	8044	1.03052	1.02206	0.961231
Co-dominant	3	pLOF	0.0001	.	6931	1.05012	1.04033	0.961602
Co-dominant	4	pLOF + missense	0.01	TRUE	15773	1.06456	1.06464	1.04466
Co-dominant	5	pLOF + missense	0.001	TRUE	15676	1.0277	1.0324	1.02467
Co-dominant	6	pLOF + missense	0.0001	TRUE	15304	1.0213	1.02768	1.00766
Co-dominant	7	pLOF + missense	0.01	FALSE	18064	1.03788	1.03917	1.02261
Co-dominant	8	pLOF + missense	0.001	FALSE	18049	1.01585	1.01512	1.01865
Co-dominant	9	pLOF + missense	0.0001	FALSE	17945	1.00389	1.00558	0.998849
Dominant	1	pLOF	0.01	.	8397	1.0351	1.03273	0.971384
Dominant	2	pLOF	0.001	.	8044	1.03104	1.02137	0.961298
Dominant	3	pLOF	0.0001	.	6931	1.04992	1.04001	0.961368
Dominant	4	pLOF + missense	0.01	TRUE	15773	1.06338	1.06075	1.04588
Dominant	5	pLOF + missense	0.001	TRUE	15676	1.02884	1.03241	1.02591
Dominant	6	pLOF + missense	0.0001	TRUE	15304	1.0213	1.02821	1.00552
Dominant	7	pLOF + missense	0.01	FALSE	18064	1.03853	1.03524	1.0223
Dominant	8	pLOF + missense	0.001	FALSE	18049	1.01659	1.01577	1.01728
Dominant	9	pLOF + missense	0.0001	FALSE	17945	1.00454	1.00449	0.997511
Recessive	1	pLOF	0.01	.	134	0.974525	0.984582	1.03821
Recessive	2	pLOF	0.001	.	33	0.803708	0.853945	0.746147
Recessive	3	pLOF	0.0001	.	16	0.983106	1.05055	0.906745
Recessive	4	pLOF + missense	0.01	TRUE	2538	0.974244	0.968148	0.937723
Recessive	5	pLOF + missense	0.001	TRUE	646	0.961809	0.971702	0.927889
Recessive	6	pLOF + missense	0.0001	TRUE	421	0.973254	0.969885	0.881783
Recessive	7	pLOF + missense	0.01	FALSE	4511	0.941143	0.954091	0.888957
Recessive	8	pLOF + missense	0.001	FALSE	1061	0.882244	0.902256	0.877413
Recessive	9	pLOF + missense	0.0001	FALSE	648	0.922279	0.938112	0.921555
aonly genes with at least 3 carriers have been tested

## Sheet: Table S2
Table S2. Complete results of the genome-wide burden joint analysis, trans-pipeline meta-analysis and trans-ethnic meta-analysis on rare variants
CHR	GENE	Variant set	Type of variant	CADD>MSC	GnomAD AF threshold	N° carriers of at least one rare variant (N° homozygous)		Co-dominant model - Joint analysis		Dominant model - Joint analysis		Recessive model - Joint analysis		Co-dominant model - Trans-pipeline meta-analysis			Dominant model - Trans-pipeline meta-analysis			Recessive model - Trans-pipeline meta-analysis			Co-dominant model - Trans-ethnic meta-analysis			Dominant model - Trans-ethnic meta-analysis			Recessive model - Trans-ethnic meta-analysis
						Cases (n=3269)	Controls (n=1373)	OR[95%CI]	P value	OR[95%CI]	P value	OR[95%CI]	P value	Z score	P value	Direction	Z score	P value	Direction	Z score	P value	Direction	Z score	P value	Direction	Z score	P value	Direction	Z score	P value	Direction
19	A1BG	3	LOF	-	0.0001	5 (0)	2 (0)	0.55 [0.09-3.28]	0.52135	0.55 [0.09-3.28]	0.52135	NA	NA	-0.66	0.509	-?	-0.66	0.509	-?	NA	NA	NA	-0.796	0.4259	+?+-?++	-0.796	0.4259	+?+-?++	NA	NA	NA
19	A1BG	2	LOF	-	0.001	6 (0)	2 (0)	0.64 [0.11-3.59]	0.62031	0.64 [0.11-3.59]	0.62031	NA	NA	0.532	0.5951	+?	0.532	0.5951	+?	NA	NA	NA	-0.35	0.7262	+?+-?++	-0.35	0.7262	+?+-?++	NA	NA	NA
19	A1BG	1	LOF	-	0.01	6 (0)	2 (0)	0.64 [0.11-3.59]	0.62031	0.64 [0.11-3.59]	0.62031	NA	NA	0.532	0.5951	+?	0.532	0.5951	+?	NA	NA	NA	-0.35	0.7262	+?+-?++	-0.35	0.7262	+?+-?++	NA	NA	NA
19	A1BG	6	MISSLOF	TRUE	0.0001	24 (0)	10 (0)	0.88 [0.35-2.18]	0.77979	0.88 [0.35-2.18]	0.77979	NA	NA	-0.32	0.7492	+-	-0.32	0.7492	+-	NA	NA	NA	-0.576	0.5644	+++--+-	-0.576	0.5644	+++--+-	NA	NA	NA
19	A1BG	9	MISSLOF	FALSE	0.0001	37 (0)	14 (0)	0.79 [0.38-1.64]	0.52874	0.79 [0.38-1.64]	0.52874	NA	NA	-0.625	0.5321	+-	-0.625	0.5321	+-	NA	NA	NA	-0.586	0.5578	+++-++-	-0.586	0.5578	+++-++-	NA	NA	NA
19	A1BG	5	MISSLOF	TRUE	0.001	34 (0)	11 (0)	1.11 [0.49-2.51]	0.79583	1.11 [0.49-2.51]	0.79583	NA	NA	0.259	0.7953	+-	0.259	0.7953	+-	NA	NA	NA	0.39	0.6965	+++-++-	0.39	0.6965	+++-++-	NA	NA	NA
19	A1BG	8	MISSLOF	FALSE	0.001	69 (0)	19 (0)	1.15 [0.64-2.05]	0.64392	1.15 [0.64-2.05]	0.64392	NA	NA	1.682	0.09251	++	1.682	0.09251	++	NA	NA	NA	0.246	0.8054	+++-++-	0.246	0.8054	+++-++-	NA	NA	NA
19	A1BG	4	MISSLOF	TRUE	0.01	88 (1)	22 (0)	1.54 [0.91-2.62]	0.10035	1.54 [0.9-2.62]	0.10359	12395 [0-5.6955E+171]	0.63741	1.46	0.1442	++	1.446	0.1481	++	0.469	0.6388	+?	1.652	0.09845	+++++--	1.636	0.1018	+++++--	0.528	0.5975	????+??
19	A1BG	7	MISSLOF	FALSE	0.01	180 (3)	36 (0)	1.58 [1.06-2.37]	0.021046	1.58 [1.05-2.37]	0.022242	21657 [0-8.0802E+161]	0.50454	2.089	0.03674	++	2.07	0.03842	++	0.676	0.4993	+?	1.794	0.07282	++-+++-	1.781	0.07484	++-+++-	0.67	0.5029	?+??+??
10	A1CF	3	LOF	-	0.0001	2 (0)	2 (0)	0.7 [0.08-5.9]	0.74334	0.7 [0.08-5.9]	0.74334	NA	NA	-0.466	0.6411	-?	-0.466	0.6411	-?	NA	NA	NA	-0.574	0.5659	???--??	-0.574	0.5659	???--??	NA	NA	NA
10	A1CF	2	LOF	-	0.001	2 (0)	2 (0)	0.7 [0.08-5.9]	0.74334	0.7 [0.08-5.9]	0.74334	NA	NA	-0.466	0.6411	-?	-0.466	0.6411	-?	NA	NA	NA	-0.574	0.5659	???--??	-0.574	0.5659	???--??	NA	NA	NA
10	A1CF	1	LOF	-	0.01	2 (0)	2 (0)	0.7 [0.08-5.9]	0.74334	0.7 [0.08-5.9]	0.74334	NA	NA	-0.466	0.6411	-?	-0.466	0.6411	-?	NA	NA	NA	-0.574	0.5659	???--??	-0.574	0.5659	???--??	NA	NA	NA
10	A1CF	6	MISSLOF	TRUE	0.0001	13 (0)	9 (0)	0.65 [0.24-1.77]	0.40835	0.65 [0.24-1.77]	0.40835	NA	NA	-1.18	0.2379	--	-1.18	0.2379	--	NA	NA	NA	0.01	0.9921	-++--++	0.01	0.9921	-++--++	NA	NA	NA
10	A1CF	9	MISSLOF	FALSE	0.0001	23 (0)	11 (0)	0.98 [0.42-2.27]	0.95917	0.98 [0.42-2.27]	0.95917	NA	NA	-0.322	0.7477	--	-0.322	0.7477	--	NA	NA	NA	1.042	0.2976	-++-+++	1.042	0.2976	-++-+++	NA	NA	NA
10	A1CF	5	MISSLOF	TRUE	0.001	18 (0)	9 (0)	0.76 [0.29-1.95]	0.56671	0.76 [0.29-1.95]	0.56671	NA	NA	-0.928	0.3533	--	-0.928	0.3533	--	NA	NA	NA	0.165	0.8688	-++--++	0.165	0.8688	-++--++	NA	NA	NA
10	A1CF	8	MISSLOF	FALSE	0.001	40 (0)	17 (0)	1.22 [0.62-2.38]	0.56196	1.22 [0.62-2.38]	0.56196	NA	NA	-0.387	0.6986	+-	-0.387	0.6986	+-	NA	NA	NA	1.495	0.1349	-++-+++	1.495	0.1349	-++-+++	NA	NA	NA
10	A1CF	4	MISSLOF	TRUE	0.01	52 (0)	42 (0)	0.64 [0.4-1.04]	0.072234	0.64 [0.4-1.04]	0.072234	NA	NA	-1.837	0.06628	--	-1.837	0.06628	--	NA	NA	NA	-1.046	0.2956	--+--++	-1.046	0.2956	--+--++	NA	NA	NA
10	A1CF	7	MISSLOF	FALSE	0.01	93 (0)	56 (0)	0.76 [0.51-1.13]	0.17561	0.76 [0.51-1.13]	0.17561	NA	NA	-1.357	0.1747	--	-1.357	0.1747	--	NA	NA	NA	0.125	0.9009	+-+--++	0.125	0.9009	+-+--++	NA	NA	NA
12	A2M	3	LOF	-	0.0001	3 (0)	0 (0)	30399 [0-1.4503E+155]	0.41542	30399 [0-1.4503E+155]	0.41542	NA	NA	0.8	0.4235	++	0.8	0.4235	++	NA	NA	NA	0.72	0.4713	?+?++??	0.72	0.4713	?+?++??	NA	NA	NA
12	A2M	2	LOF	-	0.001	3 (0)	0 (0)	30399 [0-1.4503E+155]	0.41542	30399 [0-1.4503E+155]	0.41542	NA	NA	0.8	0.4235	++	0.8	0.4235	++	NA	NA	NA	0.72	0.4713	?+?++??	0.72	0.4713	?+?++??	NA	NA	NA
12	A2M	1	LOF	-	0.01	3 (0)	0 (0)	30399 [0-1.4503E+155]	0.41542	30399 [0-1.4503E+155]	0.41542	NA	NA	0.8	0.4235	++	0.8	0.4235	++	NA	NA	NA	0.72	0.4713	?+?++??	0.72	0.4713	?+?++??	NA	NA	NA
12	A2M	6	MISSLOF	TRUE	0.0001	55 (0)	20 (0)	1.01 [0.55-1.86]	0.98393	1.01 [0.55-1.86]	0.98393	NA	NA	0.354	0.7236	++	0.354	0.7236	++	NA	NA	NA	0.495	0.6207	+--+++-	0.495	0.6207	+--+++-	NA	NA	NA
12	A2M	9	MISSLOF	FALSE	0.0001	64 (0)	28 (0)	0.76 [0.45-1.29]	0.31583	0.76 [0.45-1.29]	0.31583	NA	NA	-1.101	0.2711	--	-1.101	0.2711	--	NA	NA	NA	-0.387	0.6984	+--+++-	-0.387	0.6984	+--+++-	NA	NA	NA
12	A2M	5	MISSLOF	TRUE	0.001	86 (0)	34 (0)	0.83 [0.52-1.33]	0.44129	0.83 [0.52-1.33]	0.44129	NA	NA	-0.324	0.746	+-	-0.324	0.746	+-	NA	NA	NA	-0.518	0.6047	----++-	-0.518	0.6047	----++-	NA	NA	NA
12	A2M	8	MISSLOF	FALSE	0.001	121 (0)	56 (0)	0.7 [0.48-1.02]	0.068147	0.7 [0.48-1.02]	0.068147	NA	NA	-1.988	0.04676	--	-1.988	0.04676	--	NA	NA	NA	-1.462	0.1438	-----+-	-1.462	0.1438	-----+-	NA	NA	NA
12	A2M	4	MISSLOF	TRUE	0.01	121 (0)	44 (0)	0.81 [0.53-1.23]	0.31946	0.81 [0.53-1.23]	0.31946	NA	NA	-0.333	0.7393	+-	-0.333	0.7393	+-	NA	NA	NA	-0.663	0.5072	-+--++-	-0.663	0.5072	-+--++-	NA	NA	NA
12	A2M	7	MISSLOF	FALSE	0.01	167 (0)	70 (0)	0.68 [0.48-0.96]	0.029475	0.68 [0.48-0.96]	0.029475	NA	NA	0.572	0.5673	+-	0.572	0.5673	+-	NA	NA	NA	-1.642	0.1007	-+---+-	-1.642	0.1007	-+---+-	NA	NA	NA
12	A2ML1	3	LOF	-	0.0001	16 (0)	8 (0)	0.69 [0.24-1.93]	0.48173	0.69 [0.24-1.93]	0.48173	NA	NA	-0.717	0.4734	--	-0.717	0.4734	--	NA	NA	NA	-0.129	0.897	++?-+?+	-0.129	0.897	++?-+?+	NA	NA	NA
12	A2ML1	2	LOF	-	0.001	20 (0)	10 (0)	0.71 [0.28-1.8]	0.47199	0.71 [0.28-1.8]	0.47199	NA	NA	-0.694	0.4874	--	-0.694	0.4874	--	NA	NA	NA	-0.206	0.8364	+++-+++	-0.206	0.8364	+++-+++	NA	NA	NA
12	A2ML1	1	LOF	-	0.01	67 (0)	21 (0)	1.03 [0.57-1.87]	0.91418	1.03 [0.57-1.87]	0.91418	NA	NA	0.192	0.8475	++	0.192	0.8475	++	NA	NA	NA	-0.52	0.603	+-+-+-+	-0.52	0.603	+-+-+-+	NA	NA	NA
12	A2ML1	6	MISSLOF	TRUE	0.0001	29 (0)	17 (0)	0.5 [0.25-1.01]	0.06072	0.5 [0.25-1.01]	0.06072	NA	NA	-1.936	0.05293	--	-1.936	0.05293	--	NA	NA	NA	-1.269	0.2043	+-?-++-	-1.269	0.2043	+-?-++-	NA	NA	NA
12	A2ML1	9	MISSLOF	FALSE	0.0001	119 (0)	60 (0)	0.78 [0.54-1.14]	0.20679	0.78 [0.54-1.14]	0.20679	NA	NA	-1.333	0.1824	--	-1.333	0.1824	--	NA	NA	NA	-0.714	0.4749	-++-++-	-0.714	0.4749	-++-++-	NA	NA	NA
12	A2ML1	5	MISSLOF	TRUE	0.001	46 (0)	19 (0)	0.91 [0.48-1.72]	0.76903	0.91 [0.48-1.72]	0.76903	NA	NA	-0.479	0.632	+-	-0.479	0.632	+-	NA	NA	NA	0.111	0.9118	+-+-++-	0.111	0.9118	+-+-++-	NA	NA	NA
12	A2ML1	8	MISSLOF	FALSE	0.001	227 (0)	98 (1)	0.86 [0.64-1.15]	0.3082	0.87 [0.65-1.16]	0.34068	0 [0-4.4428E+162]	0.24265	-1.003	0.3158	--	0.11	0.9122	+-	-1.229	0.2191	-?	-0.598	0.5497	-++-+++	-0.502	0.6154	-++-+++	-1.153	0.249	????-??
12	A2ML1	4	MISSLOF	TRUE	0.01	92 (0)	30 (0)	1.06 [0.65-1.73]	0.82192	1.06 [0.65-1.73]	0.82192	NA	NA	-0.11	0.9122	+-	-0.11	0.9122	+-	NA	NA	NA	-0.472	0.6369	+-+-+--	-0.472	0.6369	+-+-+--	NA	NA	NA
12	A2ML1	7	MISSLOF	FALSE	0.01	537 (10)	184 (3)	0.94 [0.75-1.17]	0.57719	0.96 [0.76-1.2]	0.69808	0.33 [0.07-1.46]	0.17116	0.459	0.6464	++	0.288	0.7731	++	1.241	0.2147	++	-0.665	0.5061	+-+-+-+	-0.583	0.5597	+-+-+-+	-1.254	0.21	+-??-??
1	A3GALT2	3	LOF	-	0.0001	4 (0)	1 (0)	2.88 [0.25-33.66]	0.37271	2.88 [0.25-33.66]	0.37271	NA	NA	0.51	0.6102	+-	0.51	0.6102	+-	NA	NA	NA	0.009	0.9925	++?-+??	0.009	0.9925	++?-+??	NA	NA	NA
1	A3GALT2	2	LOF	-	0.001	4 (0)	1 (0)	2.88 [0.25-33.66]	0.37271	2.88 [0.25-33.66]	0.37271	NA	NA	0.51	0.6102	+-	0.51	0.6102	+-	NA	NA	NA	0.009	0.9925	++?-+??	0.009	0.9925	++?-+??	NA	NA	NA
1	A3GALT2	1	LOF	-	0.01	21 (0)	5 (0)	1.33 [0.43-4.06]	0.6135	1.33 [0.43-4.06]	0.6135	NA	NA	-0.05	0.9603	+-	-0.05	0.9603	+-	NA	NA	NA	0.186	0.8528	+-+-++?	0.186	0.8528	+-+-++?	NA	NA	NA
1	A3GALT2	6	MISSLOF	TRUE	0.0001	27 (0)	9 (0)	1.18 [0.49-2.83]	0.70371	1.18 [0.49-2.83]	0.70371	NA	NA	-0.361	0.7181	+-	-0.361	0.7181	+-	NA	NA	NA	0.928	0.3535	++-++--	0.928	0.3535	++-++--	NA	NA	NA
1	A3GALT2	9	MISSLOF	FALSE	0.0001	28 (0)	10 (0)	1.15 [0.49-2.69]	0.74011	1.15 [0.49-2.69]	0.74011	NA	NA	-0.42	0.6745	+-	-0.42	0.6745	+-	NA	NA	NA	0.93	0.3523	++-++--	0.93	0.3523	++-++--	NA	NA	NA
1	A3GALT2	5	MISSLOF	TRUE	0.001	62 (0)	16 (0)	1.72 [0.91-3.25]	0.082143	1.72 [0.91-3.25]	0.082143	NA	NA	1.812	0.07003	++	1.812	0.07003	++	NA	NA	NA	1.622	0.1048	-+-+++-	1.622	0.1048	-+-+++-	NA	NA	NA
1	A3GALT2	8	MISSLOF	FALSE	0.001	63 (0)	17 (0)	1.69 [0.9-3.14]	0.091202	1.69 [0.9-3.14]	0.091202	NA	NA	1.758	0.07876	++	1.758	0.07876	++	NA	NA	NA	1.623	0.1047	-+-+++-	1.623	0.1047	-+-+++-	NA	NA	NA
1	A3GALT2	4	MISSLOF	TRUE	0.01	174 (2)	58 (0)	1.27 [0.89-1.8]	0.18414	1.24 [0.87-1.76]	0.23683	1061800 [0-4.2829E+238]	0.0539	1.528	0.1265	++	1.377	0.1685	++	1.355	0.1753	++	1.024	0.3059	+--+-+-	0.886	0.3754	+--+-+-	1.92	0.05488	+??+???
1	A3GALT2	7	MISSLOF	FALSE	0.01	210 (2)	68 (0)	1.27 [0.91-1.75]	0.15404	1.24 [0.89-1.72]	0.19691	1061800 [0-4.2829E+238]	0.0539	1.57	0.1164	++	1.425	0.1541	++	1.355	0.1753	++	1.383	0.1666	+--+++-	1.254	0.2099	+--+++-	1.92	0.05488	+??+???
22	A4GALT	6	MISSLOF	TRUE	0.0001	13 (0)	11 (0)	0.43 [0.16-1.19]	0.1059	0.43 [0.16-1.19]	0.1059	NA	NA	-1.34	0.1801	--	-1.34	0.1801	--	NA	NA	NA	-0.941	0.3466	?+---++	-0.941	0.3466	?+---++	NA	NA	NA
22	A4GALT	9	MISSLOF	FALSE	0.0001	18 (0)	12 (0)	0.5 [0.2-1.24]	0.13817	0.5 [0.2-1.24]	0.13817	NA	NA	-1.246	0.2126	--	-1.246	0.2126	--	NA	NA	NA	-0.772	0.4403	?+---++	-0.772	0.4403	?+---++	NA	NA	NA
22	A4GALT	5	MISSLOF	TRUE	0.001	17 (0)	12 (0)	0.49 [0.19-1.24]	0.13519	0.49 [0.19-1.24]	0.13519	NA	NA	-1.229	0.2192	--	-1.229	0.2192	--	NA	NA	NA	-0.799	0.4244	++---+-	-0.799	0.4244	++---+-	NA	NA	NA
22	A4GALT	8	MISSLOF	FALSE	0.001	29 (1)	20 (0)	0.47 [0.24-0.91]	0.026963	0.45 [0.22-0.89]	0.02363	6981.4 [0-3.2082E+171]	0.7204	-1.87	0.06149	--	-1.958	0.05023	--	0.504	0.6143	?+	-1.671	0.09472	++---+-	-1.671	0.09472	++---+-	0.155	0.877	?????+?
22	A4GALT	4	MISSLOF	TRUE	0.01	24 (0)	12 (0)	0.69 [0.29-1.61]	0.39243	0.69 [0.29-1.61]	0.39243	NA	NA	-0.578	0.5636	--	-0.578	0.5636	--	NA	NA	NA	-0.298	0.7659	++---+-	-0.298	0.7659	++---+-	NA	NA	NA
22	A4GALT	7	MISSLOF	FALSE	0.01	89 (1)	28 (0)	0.9 [0.55-1.49]	0.6938	0.9 [0.55-1.48]	0.68041	6981.4 [0-3.2082E+171]	0.7204	-0.132	0.8947	+-	-0.178	0.8586	+-	0.504	0.6143	?+	-0.747	0.4551	++---+-	-0.747	0.4551	++---+-	0.155	0.877	?????+?
3	A4GNT	1	LOF	-	0.01	16 (1)	6 (0)	1.16 [0.41-3.23]	0.7812	1.11 [0.38-3.27]	0.85161	26003 [0-1.1949E+172]	0.50691	0.397	0.691	+-	0.342	0.7321	+-	0.658	0.5107	+?	-0.203	0.8389	--?++?+	-0.203	0.8389	--?++?+	0.24	0.8103	????+??
3	A4GNT	6	MISSLOF	TRUE	0.0001	19 (0)	5 (0)	1.48 [0.5-4.35]	0.46438	1.48 [0.5-4.35]	0.46438	NA	NA	0.684	0.4937	+-	0.684	0.4937	+-	NA	NA	NA	0.686	0.4928	+--++++	0.686	0.4928	+--++++	NA	NA	NA
3	A4GNT	9	MISSLOF	FALSE	0.0001	24 (0)	5 (0)	1.75 [0.61-4.97]	0.27675	1.75 [0.61-4.97]	0.27675	NA	NA	1.102	0.2703	+-	1.102	0.2703	+-	NA	NA	NA	1.001	0.3166	+--++++	1.001	0.3166	+--++++	NA	NA	NA
3	A4GNT	5	MISSLOF	TRUE	0.001	25 (0)	6 (0)	1.45 [0.55-3.84]	0.44561	1.45 [0.55-3.84]	0.44561	NA	NA	0.68	0.4966	+-	0.68	0.4966	+-	NA	NA	NA	0.725	0.4685	+--++++	0.725	0.4685	+--++++	NA	NA	NA
3	A4GNT	8	MISSLOF	FALSE	0.001	38 (0)	8 (0)	1.93 [0.83-4.53]	0.112	1.93 [0.83-4.53]	0.112	NA	NA	1.588	0.1124	++	1.588	0.1124	++	NA	NA	NA	1.933	0.05318	-+-++++	1.933	0.05318	-+-++++	NA	NA	NA
3	A4GNT	4	MISSLOF	TRUE	0.01	104 (2)	27 (0)	1.04 [0.64-1.69]	0.88321	1.02 [0.62-1.68]	0.93445	42739 [0-1.2942E+193]	0.44518	0.207	0.8364	+-	0.163	0.8703	+-	0.768	0.4425	+?	0.238	0.8119	+---+++	0.311	0.7555	+---+++	0.446	0.6555	????+?+
3	A4GNT	7	MISSLOF	FALSE	0.01	116 (2)	29 (0)	1.18 [0.74-1.9]	0.48516	1.17 [0.72-1.89]	0.51859	42739 [0-1.2942E+193]	0.44518	0.752	0.452	+-	0.712	0.4767	+-	0.768	0.4425	+?	0.983	0.3255	---++++	1.057	0.2904	---++++	0.446	0.6555	????+?+
12	AAAS	3	LOF	-	0.0001	5 (0)	1 (0)	2.71 [0.23-31.25]	0.39643	2.71 [0.23-31.25]	0.39643	NA	NA	0.633	0.5268	+-	0.633	0.5268	+-	NA	NA	NA	0.278	0.7808	?+?-+++	0.278	0.7808	?+?-+++	NA	NA	NA
12	AAAS	2	LOF	-	0.001	5 (0)	1 (0)	2.71 [0.23-31.25]	0.39643	2.71 [0.23-31.25]	0.39643	NA	NA	0.633	0.5268	+-	0.633	0.5268	+-	NA	NA	NA	0.278	0.7808	?+?-+++	0.278	0.7808	?+?-+++	NA	NA	NA
12	AAAS	1	LOF	-	0.01	5 (0)	1 (0)	2.71 [0.23-31.25]	0.39643	2.71 [0.23-31.25]	0.39643	NA	NA	0.633	0.5268	+-	0.633	0.5268	+-	NA	NA	NA	0.278	0.7808	?+?-+++	0.278	0.7808	?+?-+++	NA	NA	NA
12	AAAS	6	MISSLOF	TRUE	0.0001	29 (0)	12 (0)	0.79 [0.34-1.84]	0.59193	0.79 [0.34-1.84]	0.59193	NA	NA	-0.453	0.6507	-+	-0.453	0.6507	-+	NA	NA	NA	-0.06	0.952	++--+-+	-0.06	0.952	++--+-+	NA	NA	NA
12	AAAS	9	MISSLOF	FALSE	0.0001	37 (0)	16 (0)	0.94 [0.46-1.93]	0.85886	0.94 [0.46-1.93]	0.85886	NA	NA	-0.121	0.904	-+	-0.121	0.904	-+	NA	NA	NA	-0.848	0.3966	++--+-+	-0.848	0.3966	++--+-+	NA	NA	NA
12	AAAS	5	MISSLOF	TRUE	0.001	43 (0)	18 (0)	0.95 [0.49-1.85]	0.88012	0.95 [0.49-1.85]	0.88012	NA	NA	-0.007	0.9944	+-	-0.007	0.9944	+-	NA	NA	NA	0.118	0.906	++--+-+	0.118	0.906	++--+-+	NA	NA	NA
12	AAAS	8	MISSLOF	FALSE	0.001	56 (0)	22 (0)	1.12 [0.62-2.01]	0.71159	1.12 [0.62-2.01]	0.71159	NA	NA	-0.04	0.9681	+-	-0.04	0.9681	+-	NA	NA	NA	-0.446	0.6555	++--+-+	-0.446	0.6555	++--+-+	NA	NA	NA
12	AAAS	4	MISSLOF	TRUE	0.01	43 (0)	18 (0)	0.95 [0.49-1.85]	0.88012	0.95 [0.49-1.85]	0.88012	NA	NA	-0.007	0.9944	+-	-0.007	0.9944	+-	NA	NA	NA	0.118	0.906	++--+-+	0.118	0.906	++--+-+	NA	NA	NA
12	AAAS	7	MISSLOF	FALSE	0.01	84 (0)	24 (0)	1.4 [0.82-2.38]	0.20661	1.4 [0.82-2.38]	0.20661	NA	NA	1.537	0.1244	++	1.537	0.1244	++	NA	NA	NA	0.007	0.9948	++--+-+	0.007	0.9948	++--+-+	NA	NA	NA
12	AACS	3	LOF	-	0.0001	6 (0)	4 (0)	0.65 [0.15-2.89]	0.57927	0.65 [0.15-2.89]	0.57927	NA	NA	-0.583	0.5597	-+	-0.583	0.5597	-+	NA	NA	NA	-0.098	0.9222	-+--??+	-0.098	0.9222	-+--??+	NA	NA	NA
12	AACS	2	LOF	-	0.001	6 (0)	4 (0)	0.65 [0.15-2.89]	0.57927	0.65 [0.15-2.89]	0.57927	NA	NA	-0.583	0.5597	-+	-0.583	0.5597	-+	NA	NA	NA	-0.098	0.9222	-+--??+	-0.098	0.9222	-+--??+	NA	NA	NA
12	AACS	1	LOF	-	0.01	6 (0)	4 (0)	0.65 [0.15-2.89]	0.57927	0.65 [0.15-2.89]	0.57927	NA	NA	-0.583	0.5597	-+	-0.583	0.5597	-+	NA	NA	NA	-0.098	0.9222	-+--??+	-0.098	0.9222	-+--??+	NA	NA	NA
12	AACS	6	MISSLOF	TRUE	0.0001	54 (0)	32 (0)	0.54 [0.32-0.91]	0.021611	0.54 [0.32-0.91]	0.021611	NA	NA	-2.139	0.03246	--	-2.139	0.03246	--	NA	NA	NA	-1.26	0.2078	-++--++	-1.26	0.2078	-++--++	NA	NA	NA
12	AACS	9	MISSLOF	FALSE	0.0001	54 (0)	32 (0)	0.54 [0.32-0.91]	0.021611	0.54 [0.32-0.91]	0.021611	NA	NA	-2.139	0.03246	--	-2.139	0.03246	--	NA	NA	NA	-1.26	0.2078	-++--++	-1.26	0.2078	-++--++	NA	NA	NA
12	AACS	5	MISSLOF	TRUE	0.001	64 (0)	35 (0)	0.64 [0.39-1.05]	0.078534	0.64 [0.39-1.05]	0.078534	NA	NA	-1.63	0.103	--	-1.63	0.103	--	NA	NA	NA	-0.325	0.7449	+++--++	-0.325	0.7449	+++--++	NA	NA	NA
12	AACS	8	MISSLOF	FALSE	0.001	65 (0)	36 (0)	0.64 [0.39-1.04]	0.077618	0.64 [0.39-1.04]	0.077618	NA	NA	-1.602	0.1092	--	-1.602	0.1092	--	NA	NA	NA	-0.335	0.7373	+++--++	-0.335	0.7373	+++--++	NA	NA	NA
12	AACS	4	MISSLOF	TRUE	0.01	114 (2)	46 (0)	0.83 [0.55-1.25]	0.36831	0.82 [0.54-1.24]	0.34139	29817 [0-8.9306E+195]	0.52297	-0.272	0.7857	+-	-0.215	0.8299	+-	0.709	0.478	+?	-0.317	0.7509	+++---+	-0.315	0.7526	+++---+	0.675	0.4996	?+?????
12	AACS	7	MISSLOF	FALSE	0.01	115 (2)	47 (0)	0.83 [0.55-1.24]	0.36027	0.82 [0.54-1.23]	0.33391	29817 [0-8.9306E+195]	0.52297	-0.376	0.707	+-	-0.32	0.7488	+-	0.709	0.478	+?	-0.33	0.7414	+++---+	-0.328	0.743	+++---+	0.675	0.4996	?+?????
3	AADAC	1	LOF	-	0.01	21 (0)	8 (0)	1.52 [0.62-3.73]	0.346	1.52 [0.62-3.73]	0.346	NA	NA	-0.824	0.4098	-+	-0.824	0.4098	-+	NA	NA	NA	0.846	0.3978	+-++++?	0.846	0.3978	+-++++?	NA	NA	NA
3	AADAC	6	MISSLOF	TRUE	0.0001	13 (1)	7 (0)	0.98 [0.33-2.92]	0.97365	0.98 [0.33-2.93]	0.96772	1383.8 [0-6.3599E+170]	0.87179	-0.05	0.96	-+	-0.065	0.948	-+	0.18	0.8573	+?	0.36	0.7189	?-++-++	0.36	0.7189	?-++-++	0.162	0.8717	??????+
3	AADAC	9	MISSLOF	FALSE	0.0001	20 (1)	8 (0)	1.25 [0.49-3.19]	0.64181	1.25 [0.49-3.19]	0.645	1383.8 [0-6.3599E+170]	0.87179	0.39	0.6966	-+	0.377	0.7065	-+	0.18	0.8573	+?	0.729	0.4659	?-++-++	0.729	0.4659	?-++-++	0.162	0.8717	??????+
3	AADAC	5	MISSLOF	TRUE	0.001	19 (2)	10 (0)	1.13 [0.46-2.76]	0.78951	0.95 [0.37-2.43]	0.91104	795470 [0-9.7896E+230]	0.069182	0.307	0.7587	-+	-0.041	0.9669	-+	1.671	0.09466	+?	-0.637	0.5243	?----++	-0.472	0.6369	?----++	1.429	0.153	????+?+
3	AADAC	8	MISSLOF	FALSE	0.001	26 (2)	11 (0)	1.31 [0.59-2.91]	0.50924	1.16 [0.5-2.67]	0.73065	795470 [0-9.7896E+230]	0.069182	0.724	0.4692	-+	0.398	0.6907	-+	1.671	0.09466	+?	-0.359	0.7195	?--+-++	-0.223	0.8237	?--+-++	1.429	0.153	????+?+
3	AADAC	4	MISSLOF	TRUE	0.01	59 (2)	21 (0)	1.38 [0.78-2.46]	0.26133	1.31 [0.73-2.35]	0.3638	795470 [0-9.7896E+230]	0.069182	-0.523	0.6012	-+	-0.339	0.7347	-+	1.671	0.09466	+?	0.677	0.4981	++++-++	0.824	0.4099	++++-++	1.429	0.153	????+?+
3	AADAC	7	MISSLOF	FALSE	0.01	83 (2)	27 (0)	1.28 [0.78-2.11]	0.32768	1.22 [0.74-2.03]	0.43167	795470 [0-9.7896E+230]	0.069182	0.943	0.3458	++	0.772	0.44	++	1.671	0.09466	+?	0.604	0.5457	-+++-++	0.727	0.4672	-+++-++	1.429	0.153	????+?+
3	AADACL2	3	LOF	-	0.0001	3 (0)	2 (0)	0.61 [0.08-4.64]	0.64104	0.61 [0.08-4.64]	0.64104	NA	NA	-0.395	0.6925	--	-0.395	0.6925	--	NA	NA	NA	-0.195	0.8451	???-+??	-0.195	0.8451	???-+??	NA	NA	NA
3	AADACL2	2	LOF	-	0.001	8 (0)	2 (0)	1.04 [0.18-6.04]	0.96699	1.04 [0.18-6.04]	0.96699	NA	NA	0.105	0.9166	++	0.105	0.9166	++	NA	NA	NA	0.302	0.7625	???-+?+	0.302	0.7625	???-+?+	NA	NA	NA
3	AADACL2	1	LOF	-	0.01	8 (0)	2 (0)	1.04 [0.18-6.04]	0.96699	1.04 [0.18-6.04]	0.96699	NA	NA	0.105	0.9166	++	0.105	0.9166	++	NA	NA	NA	0.302	0.7625	???-+?+	0.302	0.7625	???-+?+	NA	NA	NA
3	AADACL2	6	MISSLOF	TRUE	0.0001	21 (0)	14 (0)	0.61 [0.29-1.31]	0.21267	0.61 [0.29-1.31]	0.21267	NA	NA	-1.279	0.2009	-+	-1.279	0.2009	-+	NA	NA	NA	-0.565	0.5719	?+?--++	-0.565	0.5719	?+?--++	NA	NA	NA
3	AADACL2	9	MISSLOF	FALSE	0.0001	27 (0)	19 (0)	0.53 [0.28-1.03]	0.067672	0.53 [0.28-1.03]	0.067672	NA	NA	-1.865	0.06221	-+	-1.865	0.06221	-+	NA	NA	NA	-1.119	0.2633	+-?--++	-1.119	0.2633	+-?--++	NA	NA	NA
3	AADACL2	5	MISSLOF	TRUE	0.001	35 (0)	17 (0)	0.81 [0.42-1.56]	0.53169	0.81 [0.42-1.56]	0.53169	NA	NA	-0.7	0.4842	-+	-0.7	0.4842	-+	NA	NA	NA	0.249	0.8033	?+?--++	0.249	0.8033	?+?--++	NA	NA	NA
3	AADACL2	8	MISSLOF	FALSE	0.001	48 (0)	26 (0)	0.69 [0.4-1.19]	0.18417	0.69 [0.4-1.19]	0.18417	NA	NA	-1.349	0.1772	-+	-1.349	0.1772	-+	NA	NA	NA	-0.457	0.6474	+-?--++	-0.457	0.6474	+-?--++	NA	NA	NA
3	AADACL2	4	MISSLOF	TRUE	0.01	45 (0)	20 (0)	0.74 [0.41-1.35]	0.33121	0.74 [0.41-1.35]	0.33121	NA	NA	-0.944	0.3452	-+	-0.944	0.3452	-+	NA	NA	NA	-0.427	0.6696	--+--++	-0.427	0.6696	--+--++	NA	NA	NA
3	AADACL2	7	MISSLOF	FALSE	0.01	58 (0)	29 (0)	0.65 [0.39-1.09]	0.11112	0.65 [0.39-1.09]	0.11112	NA	NA	-1.526	0.127	-+	-1.526	0.127	-+	NA	NA	NA	-0.872	0.3832	--+--++	-0.872	0.3832	--+--++	NA	NA	NA
1	AADACL3	3	LOF	-	0.0001	3 (0)	0 (0)	25662 [0-1.3959E+163]	0.47156	25662 [0-1.3959E+163]	0.47156	NA	NA	0.694	0.4875	++	0.694	0.4875	++	NA	NA	NA	0.577	0.5638	??+?+?+	0.577	0.5638	??+?+?+	NA	NA	NA
1	AADACL3	2	LOF	-	0.001	3 (0)	0 (0)	25662 [0-1.3959E+163]	0.47156	25662 [0-1.3959E+163]	0.47156	NA	NA	0.694	0.4875	++	0.694	0.4875	++	NA	NA	NA	0.577	0.5638	??+?+?+	0.577	0.5638	??+?+?+	NA	NA	NA
1	AADACL3	1	LOF	-	0.01	3 (0)	0 (0)	25662 [0-1.3959E+163]	0.47156	25662 [0-1.3959E+163]	0.47156	NA	NA	0.694	0.4875	++	0.694	0.4875	++	NA	NA	NA	0.577	0.5638	??+?+?+	0.577	0.5638	??+?+?+	NA	NA	NA
1	AADACL3	6	MISSLOF	TRUE	0.0001	16 (0)	2 (0)	2.64 [0.54-13.02]	0.19568	2.64 [0.54-13.02]	0.19568	NA	NA	1.306	0.1914	++	1.306	0.1914	++	NA	NA	NA	1.241	0.2147	-++++++	1.241	0.2147	-++++++	NA	NA	NA
1	AADACL3	9	MISSLOF	FALSE	0.0001	20 (0)	2 (0)	3.05 [0.64-14.62]	0.12128	3.05 [0.64-14.62]	0.12128	NA	NA	1.54	0.1235	++	1.54	0.1235	++	NA	NA	NA	1.459	0.1447	-++++++	1.459	0.1447	-++++++	NA	NA	NA
1	AADACL3	5	MISSLOF	TRUE	0.001	37 (0)	10 (0)	1.02 [0.47-2.19]	0.96346	1.02 [0.47-2.19]	0.96346	NA	NA	0.503	0.6153	++	0.503	0.6153	++	NA	NA	NA	0.382	0.7028	-++--++	0.382	0.7028	-++--++	NA	NA	NA
1	AADACL3	8	MISSLOF	FALSE	0.001	58 (0)	15 (0)	1.23 [0.64-2.33]	0.53002	1.23 [0.64-2.33]	0.53002	NA	NA	0.781	0.4348	++	0.781	0.4348	++	NA	NA	NA	0.736	0.4615	+++--++	0.736	0.4615	+++--++	NA	NA	NA
1	AADACL3	4	MISSLOF	TRUE	0.01	37 (0)	10 (0)	1.02 [0.47-2.19]	0.96346	1.02 [0.47-2.19]	0.96346	NA	NA	0.503	0.6153	++	0.503	0.6153	++	NA	NA	NA	0.382	0.7028	-++--++	0.382	0.7028	-++--++	NA	NA	NA
1	AADACL3	7	MISSLOF	FALSE	0.01	94 (1)	29 (1)	0.89 [0.55-1.45]	0.65107	0.92 [0.56-1.5]	0.73064	0.19 [0-8.05]	0.37468	1.811	0.07008	++	1.718	0.08573	++	-0.966	0.3342	-?	-0.55	0.5822	--+--++	-0.538	0.5903	--+--++	-0.801	0.4233	+???-??
1	AADACL4	3	LOF	-	0.0001	3 (0)	0 (0)	69046 [0-1.0158E+233]	0.41926	69046 [0-1.0158E+233]	0.41926	NA	NA	0.779	0.436	+?	0.779	0.436	+?	NA	NA	NA	0.422	0.6728	????+++	0.422	0.6728	????+++	NA	NA	NA
1	AADACL4	2	LOF	-	0.001	4 (0)	0 (0)	81868 [0-3.703E+207]	0.32246	81868 [0-3.703E+207]	0.32246	NA	NA	0.987	0.3234	+?	0.987	0.3234	+?	NA	NA	NA	0.525	0.5995	??+?+++	0.525	0.5995	??+?+++	NA	NA	NA
1	AADACL4	1	LOF	-	0.01	4 (0)	0 (0)	81868 [0-3.703E+207]	0.32246	81868 [0-3.703E+207]	0.32246	NA	NA	0.987	0.3234	+?	0.987	0.3234	+?	NA	NA	NA	0.525	0.5995	??+?+++	0.525	0.5995	??+?+++	NA	NA	NA
1	AADACL4	6	MISSLOF	TRUE	0.0001	18 (0)	7 (0)	0.98 [0.36-2.68]	0.97395	0.98 [0.36-2.68]	0.97395	NA	NA	0.194	0.8461	+-	0.194	0.8461	+-	NA	NA	NA	0.716	0.474	++-+++-	0.716	0.474	++-+++-	NA	NA	NA
1	AADACL4	9	MISSLOF	FALSE	0.0001	34 (0)	13 (0)	1.19 [0.57-2.49]	0.64569	1.19 [0.57-2.49]	0.64569	NA	NA	0.459	0.6459	++	0.459	0.6459	++	NA	NA	NA	1.045	0.2961	+--+++-	1.045	0.2961	+--+++-	NA	NA	NA
1	AADACL4	5	MISSLOF	TRUE	0.001	28 (0)	9 (0)	1.12 [0.47-2.67]	0.79062	1.12 [0.47-2.67]	0.79062	NA	NA	0.526	0.5989	+-	0.526	0.5989	+-	NA	NA	NA	0.738	0.4603	++-+++-	0.738	0.4603	++-+++-	NA	NA	NA
1	AADACL4	8	MISSLOF	FALSE	0.001	53 (0)	17 (0)	1.21 [0.65-2.27]	0.54469	1.21 [0.65-2.27]	0.54469	NA	NA	0.622	0.5342	++	0.622	0.5342	++	NA	NA	NA	0.904	0.3662	+--+-+-	0.904	0.3662	+--+-+-	NA	NA	NA
1	AADACL4	4	MISSLOF	TRUE	0.01	88 (0)	28 (0)	1.53 [0.94-2.5]	0.079628	1.53 [0.94-2.5]	0.079628	NA	NA	1.629	0.1033	+-	1.629	0.1033	+-	NA	NA	NA	2.588	0.009651	++-+++-	2.588	0.009651	++-+++-	NA	NA	NA
1	AADACL4	7	MISSLOF	FALSE	0.01	112 (0)	36 (0)	1.47 [0.95-2.27]	0.075303	1.47 [0.95-2.27]	0.075303	NA	NA	1.625	0.1041	++	1.625	0.1041	++	NA	NA	NA	1.583	0.1133	+--+-+-	1.583	0.1133	+--+-+-	NA	NA	NA
4	AADAT	6	MISSLOF	TRUE	0.0001	9 (0)	3 (0)	1.41 [0.28-7.18]	0.6764	1.41 [0.28-7.18]	0.6764	NA	NA	0.601	0.5481	++	0.601	0.5481	++	NA	NA	NA	0.843	0.3991	?-?+-++	0.843	0.3991	?-?+-++	NA	NA	NA
4	AADAT	9	MISSLOF	FALSE	0.0001	14 (0)	4 (0)	1.99 [0.56-7.11]	0.27305	1.99 [0.56-7.11]	0.27305	NA	NA	1.066	0.2864	++	1.066	0.2864	++	NA	NA	NA	1.241	0.2147	?-?+-++	1.241	0.2147	?-?+-++	NA	NA	NA
4	AADAT	5	MISSLOF	TRUE	0.001	9 (0)	4 (0)	1.23 [0.27-5.62]	0.79185	1.23 [0.27-5.62]	0.79185	NA	NA	0.292	0.7705	-+	0.292	0.7705	-+	NA	NA	NA	0.5	0.6173	?-?+-++	0.5	0.6173	?-?+-++	NA	NA	NA
4	AADAT	8	MISSLOF	FALSE	0.001	15 (0)	5 (0)	1.79 [0.54-5.95]	0.32937	1.79 [0.54-5.95]	0.32937	NA	NA	0.967	0.3335	-+	0.967	0.3335	-+	NA	NA	NA	1.051	0.2931	+-?+-++	1.051	0.2931	+-?+-++	NA	NA	NA
4	AADAT	4	MISSLOF	TRUE	0.01	19 (0)	13 (0)	0.82 [0.35-1.93]	0.64829	0.82 [0.35-1.93]	0.64829	NA	NA	-0.911	0.3623	--	-0.911	0.3623	--	NA	NA	NA	-0.79	0.4296	?-?--++	-0.79	0.4296	?-?--++	NA	NA	NA
4	AADAT	7	MISSLOF	FALSE	0.01	25 (0)	14 (0)	1.05 [0.48-2.28]	0.90847	1.05 [0.48-2.28]	0.90847	NA	NA	0.144	0.8855	-+	0.144	0.8855	-+	NA	NA	NA	-0.977	0.3284	+-?--++	-0.977	0.3284	+-?--++	NA	NA	NA
9	AAED1	3	LOF	-	0.0001	5 (0)	2 (0)	0.68 [0.11-4.34]	0.69334	0.68 [0.11-4.34]	0.69334	NA	NA	-0.159	0.8734	-+	-0.159	0.8734	-+	NA	NA	NA	-0.595	0.552	?++-???	-0.595	0.552	?++-???	NA	NA	NA
9	AAED1	2	LOF	-	0.001	12 (0)	5 (0)	1.23 [0.38-3.96]	0.72988	1.23 [0.38-3.96]	0.72988	NA	NA	0.304	0.7608	-+	0.304	0.7608	-+	NA	NA	NA	0.135	0.8925	?++--+?	0.135	0.8925	?++--+?	NA	NA	NA
9	AAED1	1	LOF	-	0.01	12 (0)	5 (0)	1.23 [0.38-3.96]	0.72988	1.23 [0.38-3.96]	0.72988	NA	NA	0.304	0.7608	-+	0.304	0.7608	-+	NA	NA	NA	0.135	0.8925	?++--+?	0.135	0.8925	?++--+?	NA	NA	NA
9	AAED1	6	MISSLOF	TRUE	0.0001	15 (0)	5 (0)	1.15 [0.36-3.67]	0.80876	1.15 [0.36-3.67]	0.80876	NA	NA	0.155	0.8772	+-	0.155	0.8772	+-	NA	NA	NA	0.088	0.9302	+++-?+?	0.088	0.9302	+++-?+?	NA	NA	NA
9	AAED1	9	MISSLOF	FALSE	0.0001	17 (0)	5 (0)	1.43 [0.46-4.43]	0.5242	1.43 [0.46-4.43]	0.5242	NA	NA	0.51	0.6097	+-	0.51	0.6097	+-	NA	NA	NA	0.585	0.5585	+++-?+?	0.585	0.5585	+++-?+?	NA	NA	NA
9	AAED1	5	MISSLOF	TRUE	0.001	49 (0)	19 (0)	1.26 [0.69-2.28]	0.44531	1.26 [0.69-2.28]	0.44531	NA	NA	1.045	0.2961	+-	1.045	0.2961	+-	NA	NA	NA	1.329	0.1839	+++-+++	1.329	0.1839	+++-+++	NA	NA	NA
9	AAED1	8	MISSLOF	FALSE	0.001	62 (0)	21 (0)	1.44 [0.82-2.52]	0.19408	1.44 [0.82-2.52]	0.19408	NA	NA	1.355	0.1755	+-	1.355	0.1755	+-	NA	NA	NA	1.711	0.08712	+++++++	1.711	0.08712	+++++++	NA	NA	NA
9	AAED1	4	MISSLOF	TRUE	0.01	54 (0)	24 (0)	1.02 [0.59-1.74]	0.95552	1.02 [0.59-1.74]	0.95552	NA	NA	0.259	0.7957	+-	0.259	0.7957	+-	NA	NA	NA	0.833	0.4048	++--+++	0.833	0.4048	++--+++	NA	NA	NA
9	AAED1	7	MISSLOF	FALSE	0.01	67 (0)	26 (0)	1.17 [0.7-1.96]	0.54577	1.17 [0.7-1.96]	0.54577	NA	NA	0.595	0.5516	+-	0.595	0.5516	+-	NA	NA	NA	1.212	0.2255	++-++++	1.212	0.2255	++-++++	NA	NA	NA
15	AAGAB	3	LOF	-	0.0001	2 (0)	2 (0)	0.26 [0.03-2.03]	0.21105	0.26 [0.03-2.03]	0.21105	NA	NA	-1.308	0.1907	--	-1.308	0.1907	--	NA	NA	NA	-1.674	0.0941	?-?-?+?	-1.674	0.0941	?-?-?+?	NA	NA	NA
15	AAGAB	2	LOF	-	0.001	2 (0)	2 (0)	0.26 [0.03-2.03]	0.21105	0.26 [0.03-2.03]	0.21105	NA	NA	-1.308	0.1907	--	-1.308	0.1907	--	NA	NA	NA	-1.674	0.0941	?-?-?+?	-1.674	0.0941	?-?-?+?	NA	NA	NA
15	AAGAB	1	LOF	-	0.01	21 (0)	17 (1)	0.54 [0.26-1.11]	0.10156	0.59 [0.27-1.27]	0.18261	0.04 [0-3.57]	0.031024	-0.988	0.323	-+	-0.7	0.4839	-+	-2.1	0.03571	-?	-1.674	0.09407	--?--++	-1.388	0.165	--?--++	-2.304	0.02122	???-???
15	AAGAB	6	MISSLOF	TRUE	0.0001	15 (0)	4 (0)	0.54 [0.15-1.94]	0.36651	0.54 [0.15-1.94]	0.36651	NA	NA	0.907	0.3644	++	0.907	0.3644	++	NA	NA	NA	0.659	0.5097	-+?++++	0.659	0.5097	-+?++++	NA	NA	NA
15	AAGAB	9	MISSLOF	FALSE	0.0001	26 (0)	6 (0)	0.94 [0.34-2.58]	0.90349	0.94 [0.34-2.58]	0.90349	NA	NA	0.419	0.6749	++	0.419	0.6749	++	NA	NA	NA	0.346	0.729	-+?++-+	0.346	0.729	-+?++-+	NA	NA	NA
15	AAGAB	5	MISSLOF	TRUE	0.001	29 (0)	10 (0)	0.71 [0.3-1.69]	0.44465	0.71 [0.3-1.69]	0.44465	NA	NA	-0.748	0.4544	-+	-0.748	0.4544	-+	NA	NA	NA	-0.243	0.8083	-+++-+-	-0.243	0.8083	-+++-+-	NA	NA	NA
15	AAGAB	8	MISSLOF	FALSE	0.001	46 (0)	15 (0)	0.84 [0.42-1.66]	0.61279	0.84 [0.42-1.66]	0.61279	NA	NA	-0.376	0.7071	-+	-0.376	0.7071	-+	NA	NA	NA	-0.4	0.6889	-+++---	-0.4	0.6889	-+++---	NA	NA	NA
15	AAGAB	4	MISSLOF	TRUE	0.01	48 (0)	25 (1)	0.64 [0.36-1.15]	0.14152	0.69 [0.38-1.25]	0.22335	0.04 [0-3.57]	0.031024	-1.612	0.1071	-+	-1.388	0.1651	-+	-2.1	0.03571	-?	-1.119	0.2631	-+++-+-	-0.893	0.3719	-+++-+-	-2.304	0.02122	???-???
15	AAGAB	7	MISSLOF	FALSE	0.01	69 (0)	34 (1)	0.64 [0.39-1.05]	0.083362	0.67 [0.41-1.11]	0.12862	0.04 [0-3.57]	0.031024	-1.716	0.08622	-+	-1.533	0.1252	-+	-2.1	0.03571	-?	-1.472	0.1411	-+++---	-1.459	0.1445	-+++---	-2.304	0.02122	???-???
2	AAK1	6	MISSLOF	TRUE	0.0001	31 (1)	12 (0)	0.79 [0.37-1.69]	0.5434	0.7 [0.32-1.57]	0.39648	101370 [0-4.6581E+172]	0.2462	0.654	0.5131	++	-0.782	0.434	-+	1.052	0.2926	+?	-0.662	0.5078	-++-+++	-0.685	0.4935	-++-+++	0.684	0.494	????+??
2	AAK1	9	MISSLOF	FALSE	0.0001	35 (1)	13 (0)	0.85 [0.41-1.75]	0.65757	0.77 [0.36-1.65]	0.50966	101370 [0-4.6581E+172]	0.2462	0.534	0.5934	++	0.723	0.4698	++	1.052	0.2926	+?	-0.387	0.6991	-++-+++	-0.402	0.688	-++-+++	0.684	0.494	????+??
2	AAK1	5	MISSLOF	TRUE	0.001	40 (1)	24 (0)	0.52 [0.29-0.94]	0.030761	0.47 [0.26-0.87]	0.016711	101370 [0-4.6581E+172]	0.2462	-2.123	0.03375	--	-2.347	0.0189	--	1.052	0.2926	+?	-1.973	0.04855	----+++	-2.002	0.04531	----+++	0.684	0.494	????+??
2	AAK1	8	MISSLOF	FALSE	0.001	50 (1)	26 (0)	0.59 [0.34-1.03]	0.066873	0.55 [0.32-0.96]	0.039418	101370 [0-4.6581E+172]	0.2462	-1.796	0.07249	--	-2.011	0.04433	--	1.052	0.2926	+?	-1.498	0.1341	----+++	-1.519	0.1287	----+++	0.684	0.494	????+??
2	AAK1	4	MISSLOF	TRUE	0.01	75 (1)	37 (0)	0.7 [0.44-1.11]	0.13016	0.67 [0.42-1.07]	0.096312	101370 [0-4.6581E+172]	0.2462	-0.693	0.4884	-+	-0.823	0.4105	-+	1.052	0.2926	+?	-1.531	0.1258	----+++	-1.571	0.1162	----+++	0.684	0.494	????+??
2	AAK1	7	MISSLOF	FALSE	0.01	85 (1)	39 (0)	0.74 [0.48-1.15]	0.18461	0.71 [0.46-1.11]	0.14295	101370 [0-4.6581E+172]	0.2462	-0.599	0.5495	-+	-0.717	0.4736	-+	1.052	0.2926	+?	-1.17	0.242	----+++	-1.2	0.2301	----+++	0.684	0.494	????+??
11	AAMDC	2	LOF	-	0.001	4 (0)	1 (0)	0.83 [0.07-9.98]	0.8868	0.83 [0.07-9.98]	0.8868	NA	NA	0.277	0.7818	+?	0.277	0.7818	+?	NA	NA	NA	0.062	0.9509	????-++	0.062	0.9509	????-++	NA	NA	NA
11	AAMDC	1	LOF	-	0.01	4 (0)	1 (0)	0.83 [0.07-9.98]	0.8868	0.83 [0.07-9.98]	0.8868	NA	NA	0.277	0.7818	+?	0.277	0.7818	+?	NA	NA	NA	0.062	0.9509	????-++	0.062	0.9509	????-++	NA	NA	NA
11	AAMDC	6	MISSLOF	TRUE	0.0001	5 (0)	2 (0)	0.54 [0.09-3.23]	0.51702	0.54 [0.09-3.23]	0.51702	NA	NA	-0.501	0.6165	-+	-0.501	0.6165	-+	NA	NA	NA	-0.736	0.4618	++?-++?	-0.736	0.4618	++?-++?	NA	NA	NA
11	AAMDC	9	MISSLOF	FALSE	0.0001	6 (0)	2 (0)	0.55 [0.09-3.27]	0.53165	0.55 [0.09-3.27]	0.53165	NA	NA	-0.47	0.6384	-+	-0.47	0.6384	-+	NA	NA	NA	-0.732	0.4642	++?-++?	-0.732	0.4642	++?-++?	NA	NA	NA
11	AAMDC	5	MISSLOF	TRUE	0.001	9 (0)	4 (0)	0.57 [0.15-2.08]	0.40578	0.57 [0.15-2.08]	0.40578	NA	NA	-0.687	0.4919	-+	-0.687	0.4919	-+	NA	NA	NA	-0.679	0.497	++?--++	-0.679	0.497	++?--++	NA	NA	NA
11	AAMDC	8	MISSLOF	FALSE	0.001	10 (0)	4 (0)	0.57 [0.16-2.09]	0.41479	0.57 [0.16-2.09]	0.41479	NA	NA	-0.666	0.5051	-+	-0.666	0.5051	-+	NA	NA	NA	-0.675	0.4994	++?--++	-0.675	0.4994	++?--++	NA	NA	NA
11	AAMDC	4	MISSLOF	TRUE	0.01	9 (0)	4 (0)	0.57 [0.15-2.08]	0.40578	0.57 [0.15-2.08]	0.40578	NA	NA	-0.687	0.4919	-+	-0.687	0.4919	-+	NA	NA	NA	-0.679	0.497	++?--++	-0.679	0.497	++?--++	NA	NA	NA
11	AAMDC	7	MISSLOF	FALSE	0.01	10 (0)	4 (0)	0.57 [0.16-2.09]	0.41479	0.57 [0.16-2.09]	0.41479	NA	NA	-0.666	0.5051	-+	-0.666	0.5051	-+	NA	NA	NA	-0.675	0.4994	++?--++	-0.675	0.4994	++?--++	NA	NA	NA
2	AAMP	6	MISSLOF	TRUE	0.0001	12 (0)	12 (0)	0.42 [0.17-1.03]	0.060604	0.42 [0.17-1.03]	0.060604	NA	NA	-1.827	0.06763	--	-1.827	0.06763	--	NA	NA	NA	-1.156	0.2475	?-+--++	-1.156	0.2475	?-+--++	NA	NA	NA
2	AAMP	9	MISSLOF	FALSE	0.0001	13 (0)	12 (0)	0.5 [0.2-1.22]	0.13023	0.5 [0.2-1.22]	0.13023	NA	NA	-1.517	0.1292	--	-1.517	0.1292	--	NA	NA	NA	-0.852	0.394	?-+--++	-0.852	0.394	?-+--++	NA	NA	NA
2	AAMP	5	MISSLOF	TRUE	0.001	22 (0)	13 (0)	0.8 [0.37-1.74]	0.57646	0.8 [0.37-1.74]	0.57646	NA	NA	-0.458	0.6472	--	-0.458	0.6472	--	NA	NA	NA	-1.345	0.1785	?-+--++	-1.345	0.1785	?-+--++	NA	NA	NA
2	AAMP	8	MISSLOF	FALSE	0.001	23 (0)	13 (0)	0.9 [0.41-1.95]	0.78836	0.9 [0.41-1.95]	0.78836	NA	NA	-0.209	0.8347	+-	-0.209	0.8347	+-	NA	NA	NA	-1.041	0.2977	?-+--++	-1.041	0.2977	?-+--++	NA	NA	NA
2	AAMP	4	MISSLOF	TRUE	0.01	43 (0)	15 (0)	1.02 [0.52-2.01]	0.95897	1.02 [0.52-2.01]	0.95897	NA	NA	0.093	0.9256	+-	0.093	0.9256	+-	NA	NA	NA	-0.84	0.401	+-+--++	-0.84	0.401	+-+--++	NA	NA	NA
2	AAMP	7	MISSLOF	FALSE	0.01	44 (0)	15 (0)	1.11 [0.56-2.19]	0.76718	1.11 [0.56-2.19]	0.76718	NA	NA	0.292	0.7706	+-	0.292	0.7706	+-	NA	NA	NA	-0.545	0.5858	+-+--++	-0.545	0.5858	+-+--++	NA	NA	NA
17	AANAT	6	MISSLOF	TRUE	0.0001	14 (0)	10 (0)	0.46 [0.17-1.21]	0.11635	0.46 [0.17-1.21]	0.11635	NA	NA	-1.46	0.1442	-+	-1.46	0.1442	-+	NA	NA	NA	-0.948	0.343	++---++	-0.948	0.343	++---++	NA	NA	NA
17	AANAT	9	MISSLOF	FALSE	0.0001	24 (0)	14 (0)	0.6 [0.28-1.29]	0.19477	0.6 [0.28-1.29]	0.19477	NA	NA	-1.205	0.2281	-+	-1.205	0.2281	-+	NA	NA	NA	-1.077	0.2816	++----+	-1.077	0.2816	++----+	NA	NA	NA
17	AANAT	5	MISSLOF	TRUE	0.001	25 (0)	12 (0)	0.68 [0.3-1.53]	0.36024	0.68 [0.3-1.53]	0.36024	NA	NA	-0.752	0.4523	-+	-0.752	0.4523	-+	NA	NA	NA	-0.532	0.5945	++---+-	-0.532	0.5945	++---+-	NA	NA	NA
17	AANAT	8	MISSLOF	FALSE	0.001	49 (1)	19 (0)	0.83 [0.45-1.53]	0.55603	0.82 [0.44-1.52]	0.53628	8311.6 [0-3.8193E+171]	0.69697	-0.638	0.5237	-+	-0.67	0.5026	-+	0.384	0.7007	+?	-0.471	0.6374	++-----	-0.5	0.6173	++-----	0.256	0.7983	?????+?
17	AANAT	4	MISSLOF	TRUE	0.01	25 (0)	12 (0)	0.68 [0.3-1.53]	0.36024	0.68 [0.3-1.53]	0.36024	NA	NA	-0.752	0.4523	-+	-0.752	0.4523	-+	NA	NA	NA	-0.532	0.5945	++---+-	-0.532	0.5945	++---+-	NA	NA	NA
17	AANAT	7	MISSLOF	FALSE	0.01	169 (1)	53 (0)	1.1 [0.77-1.59]	0.59221	1.1 [0.76-1.59]	0.60045	8311.6 [0-3.8193E+171]	0.69697	0.831	0.4059	++	0.844	0.3986	++	0.384	0.7007	+?	0.933	0.351	++-+-+-	0.926	0.3543	++-+-+-	0.256	0.7983	?????+?
20	AAR2	2	LOF	-	0.001	4 (0)	3 (0)	0.86 [0.16-4.64]	0.85769	0.86 [0.16-4.64]	0.85769	NA	NA	0.024	0.9806	+-	0.024	0.9806	+-	NA	NA	NA	-0.219	0.8268	+??+-??	-0.219	0.8268	+??+-??	NA	NA	NA
20	AAR2	1	LOF	-	0.01	4 (0)	3 (0)	0.86 [0.16-4.64]	0.85769	0.86 [0.16-4.64]	0.85769	NA	NA	0.024	0.9806	+-	0.024	0.9806	+-	NA	NA	NA	-0.219	0.8268	+??+-??	-0.219	0.8268	+??+-??	NA	NA	NA
20	AAR2	6	MISSLOF	TRUE	0.0001	20 (1)	10 (0)	0.68 [0.29-1.6]	0.38243	0.62 [0.25-1.55]	0.31517	22051 [0-1.0132E+172]	0.53784	-0.798	0.4248	-+	-0.993	0.3209	-+	0.638	0.5237	+?	-0.675	0.4998	+++--+-	-0.758	0.4485	+++--+-	0.497	0.619	???+???
20	AAR2	9	MISSLOF	FALSE	0.0001	20 (1)	11 (0)	0.61 [0.27-1.41]	0.2599	0.56 [0.23-1.36]	0.20487	22051 [0-1.0132E+172]	0.53784	-1.054	0.2919	-+	-1.262	0.2068	-+	0.638	0.5237	+?	-0.895	0.3707	+++--+-	-0.992	0.321	+++--+-	0.497	0.619	???+???
20	AAR2	5	MISSLOF	TRUE	0.001	57 (1)	22 (0)	1.07 [0.6-1.9]	0.81608	1.06 [0.59-1.89]	0.85284	22051 [0-1.0132E+172]	0.53784	0.577	0.5641	+-	0.54	0.5893	+-	0.638	0.5237	+?	0.527	0.5979	+++--+-	0.497	0.6193	+++--+-	0.497	0.619	???+???
20	AAR2	8	MISSLOF	FALSE	0.001	60 (1)	23 (0)	1.05 [0.6-1.84]	0.86636	1.04 [0.59-1.83]	0.90359	22051 [0-1.0132E+172]	0.53784	0.487	0.6265	+-	0.446	0.6556	+-	0.638	0.5237	+?	0.546	0.5851	+++-++-	0.513	0.608	+++-++-	0.497	0.619	???+???
20	AAR2	4	MISSLOF	TRUE	0.01	118 (1)	44 (0)	1.25 [0.84-1.87]	0.2734	1.25 [0.83-1.87]	0.28533	22051 [0-1.0132E+172]	0.53784	0.877	0.3805	+-	0.851	0.3948	+-	0.638	0.5237	+?	1.344	0.1789	++++++-	0.303	0.7619	+++-++-	0.497	0.619	???+???
20	AAR2	7	MISSLOF	FALSE	0.01	121 (1)	45 (0)	1.23 [0.83-1.84]	0.29713	1.23 [0.82-1.84]	0.30982	22051 [0-1.0132E+172]	0.53784	0.677	0.4984	+-	0.65	0.5159	+-	0.638	0.5237	+?	0.473	0.6362	+++-++-	0.49	0.6241	+++-++-	0.497	0.619	???+???
8	AARD	2	LOF	-	0.001	10 (0)	7 (1)	0.51 [0.18-1.49]	0.22904	0.68 [0.22-2.11]	0.50788	0.01 [0-0.79]	0.0029548	-1.361	0.1734	--	-0.842	0.3996	--	-2.945	0.003231	-?	-0.952	0.3412	???--+?	0.045	0.9642	???-++?	-2.934	0.003346	????-??
8	AARD	1	LOF	-	0.01	10 (0)	7 (1)	0.51 [0.18-1.49]	0.22904	0.68 [0.22-2.11]	0.50788	0.01 [0-0.79]	0.0029548	-1.361	0.1734	--	-0.842	0.3996	--	-2.945	0.003231	-?	-0.952	0.3412	???--+?	0.045	0.9642	???-++?	-2.934	0.003346	????-??
8	AARD	6	MISSLOF	TRUE	0.0001	5 (0)	0 (0)	317690 [0-5.4689E+165]	0.055055	317690 [0-5.4689E+165]	0.055055	NA	NA	1.676	0.09368	++	1.676	0.09368	++	NA	NA	NA	1.384	0.1664	+??++?+	1.384	0.1664	+??++?+	NA	NA	NA
8	AARD	9	MISSLOF	FALSE	0.0001	17 (0)	5 (0)	1.16 [0.37-3.64]	0.79818	1.16 [0.37-3.64]	0.79818	NA	NA	0.569	0.5694	++	0.569	0.5694	++	NA	NA	NA	-0.389	0.697	+-?-+++	-0.389	0.697	+-?-+++	NA	NA	NA
8	AARD	5	MISSLOF	TRUE	0.001	18 (0)	7 (1)	0.91 [0.34-2.46]	0.85263	1.19 [0.42-3.37]	0.74787	0.01 [0-0.79]	0.0029548	0.221	0.8248	+-	-0.113	0.9101	+-	-2.945	0.003231	-?	0.447	0.6547	++?+-++	0.854	0.3928	++?++++	-2.934	0.003346	????-??
8	AARD	8	MISSLOF	FALSE	0.001	33 (0)	12 (1)	0.92 [0.44-1.95]	0.83002	1.07 [0.49-2.3]	0.87021	0.01 [0-0.79]	0.0029548	0.464	0.6423	++	0.156	0.8762	++	-2.945	0.003231	-?	0.322	0.7478	+-?++++	0.695	0.4872	+-?++++	-2.934	0.003346	????-??
8	AARD	4	MISSLOF	TRUE	0.01	76 (0)	19 (1)	1.21 [0.68-2.16]	0.50404	1.32 [0.74-2.38]	0.33965	0.01 [0-0.79]	0.0029548	0.641	0.5214	++	0.9	0.3683	++	-2.945	0.003231	-?	0.444	0.657	-++-++-	0.569	0.5697	-++-++-	-2.934	0.003346	????-??
8	AARD	7	MISSLOF	FALSE	0.01	119 (0)	32 (1)	0.96 [0.61-1.52]	0.86919	1.02 [0.64-1.61]	0.94882	0.01 [0-0.79]	0.0029548	0.265	0.7907	++	0.102	0.9189	++	-2.945	0.003231	-?	-0.782	0.4345	--+-++-	-0.502	0.6159	--+-++-	-2.934	0.003346	????-??
16	AARS	3	LOF	-	0.0001	4 (0)	0 (0)	147600 [0-1.2896E+214]	0.21492	147600 [0-1.2896E+214]	0.21492	NA	NA	1.217	0.2235	++	1.217	0.2235	++	NA	NA	NA	0.785	0.4323	?+??++?	0.785	0.4323	?+??++?	NA	NA	NA
16	AARS	2	LOF	-	0.001	4 (0)	0 (0)	147600 [0-1.2896E+214]	0.21492	147600 [0-1.2896E+214]	0.21492	NA	NA	1.217	0.2235	++	1.217	0.2235	++	NA	NA	NA	0.785	0.4323	?+??++?	0.785	0.4323	?+??++?	NA	NA	NA
16	AARS	1	LOF	-	0.01	4 (0)	0 (0)	147600 [0-1.2896E+214]	0.21492	147600 [0-1.2896E+214]	0.21492	NA	NA	1.217	0.2235	++	1.217	0.2235	++	NA	NA	NA	0.785	0.4323	?+??++?	0.785	0.4323	?+??++?	NA	NA	NA
16	AARS	6	MISSLOF	TRUE	0.0001	35 (0)	14 (0)	0.96 [0.46-1.98]	0.90385	0.96 [0.46-1.98]	0.90385	NA	NA	-0.075	0.9404	+-	-0.075	0.9404	+-	NA	NA	NA	-0.267	0.7891	?++--++	-0.267	0.7891	?++--++	NA	NA	NA
16	AARS	9	MISSLOF	FALSE	0.0001	50 (0)	19 (0)	0.93 [0.5-1.7]	0.80423	0.93 [0.5-1.7]	0.80423	NA	NA	0.044	0.9652	+-	0.044	0.9652	+-	NA	NA	NA	-0.177	0.8598	++---++	-0.177	0.8598	++---++	NA	NA	NA
16	AARS	5	MISSLOF	TRUE	0.001	52 (1)	16 (0)	1.23 [0.66-2.31]	0.50546	1.19 [0.62-2.27]	0.59791	106190 [0-4.8796E+172]	0.23801	0.741	0.4589	++	0.63	0.5289	++	1.307	0.1913	?+	0.672	0.5017	-++--++	0.418	0.6759	-++--++	1.404	0.1603	???+???
16	AARS	8	MISSLOF	FALSE	0.001	73 (1)	22 (0)	1.22 [0.72-2.08]	0.45392	1.19 [0.69-2.05]	0.52787	106190 [0-4.8796E+172]	0.23801	0.338	0.7351	+-	0.468	0.64	+-	1.307	0.1913	?+	0.55	0.5826	-+---++	0.448	0.6539	-+---++	1.404	0.1603	???+???
16	AARS	4	MISSLOF	TRUE	0.01	304 (2)	141 (3)	1.08 [0.85-1.37]	0.54154	1.1 [0.86-1.41]	0.44014	0.29 [0.04-2.14]	0.22197	0.556	0.5783	-+	0.568	0.5701	-+	-1.34	0.1803	--	1.033	0.3015	+++++-+	1.009	0.3127	+++-+-+	-1.104	0.2697	???+--?
16	AARS	7	MISSLOF	FALSE	0.01	344 (2)	149 (3)	1.1 [0.87-1.39]	0.40859	1.13 [0.89-1.43]	0.32462	0.29 [0.04-2.14]	0.22197	-0.8	0.4238	--	-0.965	0.3346	--	-1.34	0.1803	--	1.308	0.191	++-++-+	1.471	0.1414	++-++-+	-1.104	0.2697	???+--?
6	AARS2	3	LOF	-	0.0001	10 (0)	2 (0)	1.41 [0.26-7.62]	0.68448	1.41 [0.26-7.62]	0.68448	NA	NA	1.228	0.2193	+-	1.228	0.2193	+-	NA	NA	NA	0.946	0.3443	++++?+?	0.946	0.3443	++++?+?	NA	NA	NA
6	AARS2	2	LOF	-	0.001	10 (0)	2 (0)	1.41 [0.26-7.62]	0.68448	1.41 [0.26-7.62]	0.68448	NA	NA	1.228	0.2193	+-	1.228	0.2193	+-	NA	NA	NA	0.946	0.3443	++++?+?	0.946	0.3443	++++?+?	NA	NA	NA
6	AARS2	1	LOF	-	0.01	10 (0)	2 (0)	1.41 [0.26-7.62]	0.68448	1.41 [0.26-7.62]	0.68448	NA	NA	1.228	0.2193	+-	1.228	0.2193	+-	NA	NA	NA	0.946	0.3443	++++?+?	0.946	0.3443	++++?+?	NA	NA	NA
6	AARS2	6	MISSLOF	TRUE	0.0001	44 (0)	12 (0)	1.3 [0.63-2.66]	0.47135	1.3 [0.63-2.66]	0.47135	NA	NA	0.997	0.3186	+-	0.997	0.3186	+-	NA	NA	NA	1.444	0.1488	+++-+++	1.444	0.1488	+++-+++	NA	NA	NA
6	AARS2	9	MISSLOF	FALSE	0.0001	60 (1)	20 (0)	1.2 [0.66-2.19]	0.55184	1.2 [0.65-2.18]	0.55758	3980.9 [0-1.8295E+171]	0.78555	0.901	0.3675	+-	0.893	0.3716	+-	0.294	0.7686	+?	0.93	0.3523	+++-++-	0.945	0.3447	+++-++-	0.336	0.7365	??????+
6	AARS2	5	MISSLOF	TRUE	0.001	68 (0)	24 (0)	1.06 [0.62-1.82]	0.82719	1.06 [0.62-1.82]	0.82719	NA	NA	0.258	0.7965	+-	0.258	0.7965	+-	NA	NA	NA	0.852	0.3945	-+++++-	0.852	0.3945	-+++++-	NA	NA	NA
6	AARS2	8	MISSLOF	FALSE	0.001	113 (1)	39 (1)	0.97 [0.62-1.49]	0.87383	1.01 [0.65-1.57]	0.962	0.04 [0-0.65]	0.050518	-0.057	0.9546	+-	0.162	0.8716	+-	-1.886	0.05936	-?	0.243	0.8079	-++-++-	0.307	0.7591	-++-++-	-1.504	0.1326	??????-
6	AARS2	4	MISSLOF	TRUE	0.01	112 (0)	35 (1)	1.02 [0.65-1.6]	0.92015	1.06 [0.67-1.67]	0.80914	0 [0-2.8162E+162]	0.17321	0.003	0.9977	+-	0.154	0.8775	+-	-1.371	0.1703	-?	0.77	0.4411	-++++--	0.814	0.4155	-++++--	-1.215	0.2244	-??????
6	AARS2	7	MISSLOF	FALSE	0.01	241 (3)	69 (2)	0.98 [0.69-1.38]	0.90621	1 [0.7-1.43]	0.99432	0.46 [0.05-3.99]	0.48334	-0.069	0.945	+-	0.059	0.9528	+-	-0.663	0.5075	-?	0.618	0.5368	-++-++-	0.74	0.4593	+++-++-	-1.588	0.1123	-?????-
17	AARSD1	3	LOF	-	0.0001	5 (0)	2 (0)	0.64 [0.12-3.51]	0.61601	0.64 [0.12-3.51]	0.61601	NA	NA	0.268	0.7884	+-	0.268	0.7884	+-	NA	NA	NA	-0.174	0.8621	???-+++	-0.174	0.8621	???-+++	NA	NA	NA
17	AARSD1	2	LOF	-	0.001	13 (0)	3 (0)	1.45 [0.36-5.83]	0.59138	1.45 [0.36-5.83]	0.59138	NA	NA	0.668	0.5042	+-	0.668	0.5042	+-	NA	NA	NA	0.871	0.3837	+-?++++	0.871	0.3837	+-?++++	NA	NA	NA
17	AARSD1	1	LOF	-	0.01	13 (0)	3 (0)	1.45 [0.36-5.83]	0.59138	1.45 [0.36-5.83]	0.59138	NA	NA	0.668	0.5042	+-	0.668	0.5042	+-	NA	NA	NA	0.871	0.3837	+-?++++	0.871	0.3837	+-?++++	NA	NA	NA
17	AARSD1	6	MISSLOF	TRUE	0.0001	24 (0)	9 (1)	0.79 [0.34-1.84]	0.59416	0.93 [0.38-2.31]	0.87935	0.05 [0-4.42]	0.042878	0.907	0.3643	++	0.529	0.5971	++	-2.033	0.04206	-?	-0.002	0.9981	+++-+--	0.153	0.8787	+++-+--	-3.052	0.00227	??????-
17	AARSD1	9	MISSLOF	FALSE	0.0001	32 (0)	11 (1)	1 [0.47-2.16]	0.99036	1.16 [0.52-2.59]	0.71511	0.05 [0-4.42]	0.042878	0.457	0.6477	++	0.471	0.6379	++	-2.033	0.04206	-?	-0.218	0.8275	+++-+--	-0.063	0.9499	+++-+--	-3.052	0.00227	??????-
17	AARSD1	5	MISSLOF	TRUE	0.001	48 (0)	17 (1)	1.05 [0.56-1.98]	0.88577	1.16 [0.6-2.22]	0.6639	0.05 [0-4.42]	0.042878	0.425	0.6708	++	0.474	0.6356	++	-2.033	0.04206	-?	0.414	0.6791	+-+-+--	0.634	0.5258	+-+-+--	-3.052	0.00227	??????-
17	AARSD1	8	MISSLOF	FALSE	0.001	57 (0)	19 (1)	1.17 [0.64-2.12]	0.61026	1.27 [0.69-2.35]	0.43262	0.05 [0-4.42]	0.042878	0.567	0.5705	++	0.864	0.3875	++	-2.033	0.04206	-?	0.132	0.8949	+-+-+--	0.353	0.7241	+-+-+--	-3.052	0.00227	??????-
17	AARSD1	4	MISSLOF	TRUE	0.01	64 (0)	22 (1)	1.03 [0.58-1.83]	0.91041	1.12 [0.62-2.01]	0.70936	0.05 [0-4.42]	0.042878	0.215	0.83	+-	0.495	0.6204	+-	-2.033	0.04206	-?	0.016	0.9869	+---+--	0.239	0.8115	+---+--	-3.052	0.00227	??????-
17	AARSD1	7	MISSLOF	FALSE	0.01	73 (0)	24 (1)	1.13 [0.66-1.95]	0.65293	1.22 [0.7-2.11]	0.48479	0.05 [0-4.42]	0.042878	0.558	0.5772	+-	0.826	0.4086	+-	-2.033	0.04206	-?	0.036	0.9713	+---+--	0.258	0.7963	+---+--	-3.052	0.00227	??????-
4	AASDH	2	LOF	-	0.001	2 (0)	1 (0)	1.1 [0.07-16.62]	0.94646	1.1 [0.07-16.62]	0.94646	NA	NA	-0.61	0.5418	-+	-0.61	0.5418	-+	NA	NA	NA	0.219	0.8268	???+???	0.219	0.8268	???+???	NA	NA	NA
4	AASDH	1	LOF	-	0.01	2 (0)	1 (0)	1.1 [0.07-16.62]	0.94646	1.1 [0.07-16.62]	0.94646	NA	NA	-0.61	0.5418	-+	-0.61	0.5418	-+	NA	NA	NA	0.219	0.8268	???+???	0.219	0.8268	???+???	NA	NA	NA
4	AASDH	6	MISSLOF	TRUE	0.0001	32 (0)	17 (0)	0.78 [0.39-1.56]	0.4855	0.78 [0.39-1.56]	0.4855	NA	NA	-0.605	0.5451	-+	-0.605	0.5451	-+	NA	NA	NA	-0.516	0.6055	--++--+	-0.516	0.6055	--++--+	NA	NA	NA
4	AASDH	9	MISSLOF	FALSE	0.0001	54 (2)	21 (0)	1.16 [0.66-2.05]	0.60025	1.12 [0.62-2.02]	0.69684	104310 [0-3.7544E+194]	0.25979	0.242	0.8087	+-	0.126	0.9	+-	1.045	0.296	+?	0.388	0.6977	--++--+	0.388	0.6977	--++--+	1.076	0.282	???+?+?
4	AASDH	5	MISSLOF	TRUE	0.001	63 (0)	34 (0)	0.77 [0.47-1.26]	0.30203	0.77 [0.47-1.26]	0.30203	NA	NA	-1.018	0.3085	--	-1.018	0.3085	--	NA	NA	NA	-1.649	0.09917	--+---+	-1.649	0.09917	--+---+	NA	NA	NA
4	AASDH	8	MISSLOF	FALSE	0.001	95 (2)	39 (0)	1.04 [0.68-1.6]	0.8621	1.01 [0.65-1.57]	0.95274	104310 [0-3.7544E+194]	0.25979	-0.081	0.9354	+-	-0.017	0.9866	+-	1.045	0.296	+?	0.396	0.6924	--++--+	0.397	0.6916	--++--+	1.076	0.282	???+?+?
4	AASDH	4	MISSLOF	TRUE	0.01	144 (1)	56 (1)	0.89 [0.62-1.3]	0.56217	0.91 [0.62-1.33]	0.61677	0.33 [0.02-6.36]	0.47037	-0.051	0.9592	+-	-0.127	0.8991	+-	-0.687	0.4918	-?	-0.664	0.5067	--+---+	-0.664	0.5067	--+---+	NA	NA	NA
4	AASDH	7	MISSLOF	FALSE	0.01	173 (3)	61 (1)	1.07 [0.75-1.51]	0.71804	1.07 [0.75-1.52]	0.7199	1.11 [0.11-11.61]	0.93003	0.233	0.8154	+-	0.241	0.8092	+-	0.038	0.97	+?	0.681	0.4958	--++-+-	0.603	0.5464	--++-+-	1.076	0.282	???+?+?
11	AASDHPPT	9	MISSLOF	FALSE	0.0001	14 (0)	6 (0)	0.64 [0.21-1.94]	0.44096	0.64 [0.21-1.94]	0.44096	NA	NA	-0.705	0.4811	-+	-0.705	0.4811	-+	NA	NA	NA	-0.273	0.7848	?++--++	-0.273	0.7848	?++--++	NA	NA	NA
11	AASDHPPT	8	MISSLOF	FALSE	0.001	22 (0)	9 (0)	0.68 [0.28-1.68]	0.4135	0.68 [0.28-1.68]	0.4135	NA	NA	-0.802	0.4226	--	-0.802	0.4226	--	NA	NA	NA	-0.456	0.6486	?++--++	-0.456	0.6486	?++--++	NA	NA	NA
11	AASDHPPT	7	MISSLOF	FALSE	0.01	22 (0)	9 (0)	0.68 [0.28-1.68]	0.4135	0.68 [0.28-1.68]	0.4135	NA	NA	-0.802	0.4226	--	-0.802	0.4226	--	NA	NA	NA	-0.456	0.6486	?++--++	-0.456	0.6486	?++--++	NA	NA	NA
7	AASS	3	LOF	-	0.0001	2 (0)	1 (0)	0.68 [0.04-12.35]	0.79703	0.68 [0.04-12.35]	0.79703	NA	NA	0.153	0.8781	+-	0.153	0.8781	+-	NA	NA	NA	-0.37	0.7112	???-?+?	-0.37	0.7112	???-?+?	NA	NA	NA
7	AASS	2	LOF	-	0.001	2 (0)	1 (0)	0.68 [0.04-12.35]	0.79703	0.68 [0.04-12.35]	0.79703	NA	NA	0.153	0.8781	+-	0.153	0.8781	+-	NA	NA	NA	-0.37	0.7112	???-?+?	-0.37	0.7112	???-?+?	NA	NA	NA
7	AASS	1	LOF	-	0.01	2 (0)	1 (0)	0.68 [0.04-12.35]	0.79703	0.68 [0.04-12.35]	0.79703	NA	NA	0.153	0.8781	+-	0.153	0.8781	+-	NA	NA	NA	-0.37	0.7112	???-?+?	-0.37	0.7112	???-?+?	NA	NA	NA
7	AASS	6	MISSLOF	TRUE	0.0001	21 (1)	13 (0)	0.55 [0.23-1.28]	0.17358	0.5 [0.2-1.24]	0.13938	13982 [0-6.4254E+171]	0.61803	-1.546	0.1222	--	-1.643	0.1005	--	0.499	0.6179	+?	-1.218	0.2233	+-+--++	-1.218	0.2233	+-+--++	0.672	0.5017	??????+
7	AASS	9	MISSLOF	FALSE	0.0001	45 (1)	21 (0)	0.77 [0.41-1.45]	0.421	0.75 [0.39-1.43]	0.39027	13982 [0-6.4254E+171]	0.61803	-0.833	0.4049	--	-0.885	0.3759	--	0.499	0.6179	+?	-0.869	0.3848	-+---++	-0.869	0.3848	-+---++	0.672	0.5017	??????+
7	AASS	5	MISSLOF	TRUE	0.001	28 (1)	14 (0)	0.73 [0.34-1.61]	0.44561	0.7 [0.31-1.59]	0.40324	13982 [0-6.4254E+171]	0.61803	-1.065	0.2868	--	-1.124	0.2611	--	0.499	0.6179	+?	-0.467	0.6408	+-+--++	-0.467	0.6408	+-+--++	0.672	0.5017	??????+
7	AASS	8	MISSLOF	FALSE	0.001	77 (2)	29 (0)	1.11 [0.67-1.83]	0.69645	1.09 [0.65-1.82]	0.75508	58104 [0-5.5837E+197]	0.38755	0.176	0.86	+-	0.103	0.9183	+-	0.852	0.3942	+?	0.546	0.5853	-++++++	0.369	0.7121	-+++-++	0.661	0.5084	????+?+
7	AASS	4	MISSLOF	TRUE	0.01	41 (1)	19 (0)	1.15 [0.6-2.22]	0.66477	1.14 [0.59-2.22]	0.68849	13982 [0-6.4254E+171]	0.61803	-0.71	0.4777	--	-0.682	0.4955	--	0.499	0.6179	+?	0.37	0.7112	+-++-++	0.37	0.7112	+-++-++	0.672	0.5017	??????+
7	AASS	7	MISSLOF	FALSE	0.01	97 (2)	39 (0)	1.16 [0.75-1.8]	0.50622	1.15 [0.73-1.79]	0.54783	58104 [0-5.5837E+197]	0.38755	0.392	0.6953	+-	0.332	0.7398	+-	0.852	0.3942	+?	0.826	0.409	--+++++	0.649	0.5163	--++-++	0.661	0.5084	????+?+
17	AATK	3	LOF	-	0.0001	3 (0)	3 (0)	0.31 [0.05-1.75]	0.19557	0.31 [0.05-1.75]	0.19557	NA	NA	-1.18	0.2379	-+	-1.18	0.2379	-+	NA	NA	NA	-1.224	0.2208	?-?+-+?	-1.224	0.2208	?-?+-+?	NA	NA	NA
17	AATK	2	LOF	-	0.001	3 (0)	3 (0)	0.31 [0.05-1.75]	0.19557	0.31 [0.05-1.75]	0.19557	NA	NA	-1.18	0.2379	-+	-1.18	0.2379	-+	NA	NA	NA	-1.224	0.2208	?-?+-+?	-1.224	0.2208	?-?+-+?	NA	NA	NA
17	AATK	1	LOF	-	0.01	3 (0)	3 (0)	0.31 [0.05-1.75]	0.19557	0.31 [0.05-1.75]	0.19557	NA	NA	-1.18	0.2379	-+	-1.18	0.2379	-+	NA	NA	NA	-1.224	0.2208	?-?+-+?	-1.224	0.2208	?-?+-+?	NA	NA	NA
17	AATK	6	MISSLOF	TRUE	0.0001	3 (0)	3 (0)	0.31 [0.05-1.75]	0.19557	0.31 [0.05-1.75]	0.19557	NA	NA	-1.18	0.2379	-+	-1.18	0.2379	-+	NA	NA	NA	-1.224	0.2208	?-?+-+?	-1.224	0.2208	?-?+-+?	NA	NA	NA
17	AATK	9	MISSLOF	FALSE	0.0001	115 (1)	42 (0)	0.97 [0.64-1.47]	0.88855	0.97 [0.64-1.46]	0.87368	9894.5 [0-4.5466E+171]	0.672	0.138	0.8901	++	0.157	0.8752	++	0.406	0.6845	+?	0.6	0.5483	++-+++-	0.62	0.5354	++-+++-	0.426	0.6699	????+??
17	AATK	5	MISSLOF	TRUE	0.001	3 (0)	3 (0)	0.31 [0.05-1.75]	0.19557	0.31 [0.05-1.75]	0.19557	NA	NA	-1.18	0.2379	-+	-1.18	0.2379	-+	NA	NA	NA	-1.224	0.2208	?-?+-+?	-1.224	0.2208	?-?+-+?	NA	NA	NA
17	AATK	8	MISSLOF	FALSE	0.001	186 (1)	73 (0)	0.87 [0.63-1.2]	0.3866	0.86 [0.63-1.19]	0.37731	9894.5 [0-4.5466E+171]	0.672	0.278	0.781	+-	0.294	0.7685	+-	0.406	0.6845	+?	0.143	0.8865	++--++-	0.16	0.873	++--++-	0.426	0.6699	????+??
17	AATK	4	MISSLOF	TRUE	0.01	3 (0)	3 (0)	0.31 [0.05-1.75]	0.19557	0.31 [0.05-1.75]	0.19557	NA	NA	-1.18	0.2379	-+	-1.18	0.2379	-+	NA	NA	NA	-1.224	0.2208	?-?+-+?	-1.224	0.2208	?-?+-+?	NA	NA	NA
17	AATK	7	MISSLOF	FALSE	0.01	364 (4)	146 (0)	0.91 [0.72-1.15]	0.43268	0.9 [0.71-1.14]	0.38831	128980 [0-2.4887E+214]	0.24561	-0.905	0.3653	+-	-0.971	0.3314	+-	1.121	0.2621	+?	-0.219	0.8269	++--++-	-0.217	0.8279	++--++-	0.738	0.4603	+???++?
16	ABAT	6	MISSLOF	TRUE	0.0001	5 (0)	2 (0)	1.65 [0.3-9.11]	0.55514	1.65 [0.3-9.11]	0.55514	NA	NA	0.752	0.4523	-+	0.752	0.4523	-+	NA	NA	NA	0.386	0.6994	?-?+???	0.386	0.6994	?-?+???	NA	NA	NA
16	ABAT	9	MISSLOF	FALSE	0.0001	24 (0)	6 (0)	1.5 [0.54-4.11]	0.42374	1.5 [0.54-4.11]	0.42374	NA	NA	0.781	0.435	++	0.781	0.435	++	NA	NA	NA	0.668	0.5043	--?++++	0.668	0.5043	--?++++	NA	NA	NA
16	ABAT	5	MISSLOF	TRUE	0.001	5 (0)	2 (0)	1.65 [0.3-9.11]	0.55514	1.65 [0.3-9.11]	0.55514	NA	NA	0.752	0.4523	-+	0.752	0.4523	-+	NA	NA	NA	0.386	0.6994	?-?+???	0.386	0.6994	?-?+???	NA	NA	NA
16	ABAT	8	MISSLOF	FALSE	0.001	31 (0)	7 (0)	1.54 [0.62-3.84]	0.33739	1.54 [0.62-3.84]	0.33739	NA	NA	0.964	0.3352	++	0.964	0.3352	++	NA	NA	NA	0.747	0.4548	---++++	0.747	0.4548	---++++	NA	NA	NA
16	ABAT	4	MISSLOF	TRUE	0.01	5 (0)	2 (0)	1.65 [0.3-9.11]	0.55514	1.65 [0.3-9.11]	0.55514	NA	NA	0.752	0.4523	-+	0.752	0.4523	-+	NA	NA	NA	0.386	0.6994	?-?+???	0.386	0.6994	?-?+???	NA	NA	NA
16	ABAT	7	MISSLOF	FALSE	0.01	50 (0)	19 (0)	0.94 [0.51-1.75]	0.85188	0.94 [0.51-1.75]	0.85188	NA	NA	-0.24	0.8103	+-	-0.24	0.8103	+-	NA	NA	NA	-0.597	0.5502	+---+++	-0.597	0.5502	+---+++	NA	NA	NA
9	ABCA1	3	LOF	-	0.0001	6 (0)	1 (0)	1.6 [0.13-19.85]	0.70796	1.6 [0.13-19.85]	0.70796	NA	NA	0.282	0.7779	+?	0.282	0.7779	+?	NA	NA	NA	-0.18	0.8574	?+?-+?+	-0.18	0.8574	?+?-+?+	NA	NA	NA
9	ABCA1	2	LOF	-	0.001	6 (0)	1 (0)	1.6 [0.13-19.85]	0.70796	1.6 [0.13-19.85]	0.70796	NA	NA	0.282	0.7779	+?	0.282	0.7779	+?	NA	NA	NA	-0.18	0.8574	?+?-+?+	-0.18	0.8574	?+?-+?+	NA	NA	NA
9	ABCA1	1	LOF	-	0.01	6 (0)	1 (0)	1.6 [0.13-19.85]	0.70796	1.6 [0.13-19.85]	0.70796	NA	NA	0.282	0.7779	+?	0.282	0.7779	+?	NA	NA	NA	-0.18	0.8574	?+?-+?+	-0.18	0.8574	?+?-+?+	NA	NA	NA
9	ABCA1	6	MISSLOF	TRUE	0.0001	92 (0)	43 (0)	0.85 [0.56-1.31]	0.473	0.85 [0.56-1.31]	0.473	NA	NA	-0.884	0.3769	-+	-0.884	0.3769	-+	NA	NA	NA	-0.512	0.6086	-----++	-0.512	0.6086	-----++	NA	NA	NA
9	ABCA1	9	MISSLOF	FALSE	0.0001	101 (0)	46 (0)	0.89 [0.59-1.35]	0.58164	0.89 [0.59-1.35]	0.58164	NA	NA	-0.678	0.4976	-+	-0.678	0.4976	-+	NA	NA	NA	-0.276	0.7829	-----++	-0.276	0.7829	-----++	NA	NA	NA
9	ABCA1	5	MISSLOF	TRUE	0.001	158 (0)	51 (0)	1.1 [0.76-1.6]	0.60462	1.1 [0.76-1.6]	0.60462	NA	NA	0.477	0.6334	++	0.477	0.6334	++	NA	NA	NA	0.673	0.5008	-+-+-++	0.673	0.5008	-+-+-++	NA	NA	NA
9	ABCA1	8	MISSLOF	FALSE	0.001	184 (0)	63 (2)	1.01 [0.73-1.42]	0.9349	1.06 [0.75-1.49]	0.75624	0.1 [0-4.34]	0.08017	0.022	0.9824	++	0.26	0.7952	++	-1.885	0.05947	-?	0.393	0.6942	-+-+-++	0.512	0.6085	-+-+-++	-1.571	0.1161	????-??
9	ABCA1	4	MISSLOF	TRUE	0.01	271 (1)	77 (0)	1.38 [1.02-1.87]	0.032392	1.38 [1.02-1.87]	0.032778	5737 [0-2.6365E+171]	0.74492	2.116	0.03434	++	2.11	0.03486	++	0.341	0.7329	+?	2.514	0.01194	-+-++++	2.518	0.01181	-+-++++	0.422	0.6731	??????+
9	ABCA1	7	MISSLOF	FALSE	0.01	304 (2)	92 (2)	1.22 [0.93-1.62]	0.15273	1.26 [0.95-1.68]	0.10398	0.14 [0.01-1.57]	0.11241	1.376	0.1687	++	1.573	0.1157	++	-1.637	0.1016	-?	1.86	0.06294	-+-+-++	1.966	0.04931	-+-+-++	-0.848	0.3964	+???-?+
17	ABCA10	3	LOF	-	0.0001	8 (0)	1 (0)	1.82 [0.21-15.38]	0.55815	1.82 [0.21-15.38]	0.55815	NA	NA	0.664	0.5068	++	0.664	0.5068	++	NA	NA	NA	0.691	0.4894	+++++-?	0.691	0.4894	+++++-?	NA	NA	NA
17	ABCA10	2	LOF	-	0.001	22 (1)	5 (0)	1.25 [0.42-3.69]	0.68291	1.21 [0.39-3.74]	0.73102	19004 [0-8.7335E+171]	0.56524	0.563	0.5731	++	0.506	0.6129	++	0.553	0.5806	+?	0.29	0.7716	++-++-+	0.287	0.7744	++-++-+	0.212	0.8319	??????+
17	ABCA10	1	LOF	-	0.01	65 (1)	17 (0)	1.03 [0.55-1.96]	0.92013	1.02 [0.53-1.95]	0.95859	19004 [0-8.7335E+171]	0.56524	0.07	0.9442	++	0.031	0.9753	++	0.553	0.5806	+?	-0.932	0.3514	----+-+	-0.936	0.3495	----+-+	0.212	0.8319	??????+
17	ABCA10	6	MISSLOF	TRUE	0.0001	56 (0)	22 (0)	0.95 [0.53-1.71]	0.87031	0.95 [0.53-1.71]	0.87031	NA	NA	0.075	0.9399	+-	0.075	0.9399	+-	NA	NA	NA	-0.065	0.9482	++--+--	-0.065	0.9482	++--+--	NA	NA	NA
17	ABCA10	9	MISSLOF	FALSE	0.0001	83 (0)	26 (0)	1.24 [0.74-2.07]	0.41814	1.24 [0.74-2.07]	0.41814	NA	NA	0.761	0.4468	+-	0.761	0.4468	+-	NA	NA	NA	0.881	0.3785	++--+-+	0.881	0.3785	++--+-+	NA	NA	NA
17	ABCA10	5	MISSLOF	TRUE	0.001	122 (2)	44 (0)	0.97 [0.64-1.46]	0.88309	0.95 [0.63-1.45]	0.82457	58817 [0-5.2879E+199]	0.38772	0.584	0.5595	++	0.651	0.5149	++	0.815	0.4152	+?	-0.278	0.7812	++--+--	-0.289	0.7722	++--+--	0.307	0.7587	??????+
17	ABCA10	8	MISSLOF	FALSE	0.001	154 (2)	55 (0)	1 [0.7-1.45]	0.98538	0.99 [0.68-1.44]	0.96355	58817 [0-5.2879E+199]	0.38772	-0.058	0.9535	+-	-0.002	0.9988	+-	0.815	0.4152	+?	-0.099	0.921	++--+--	-0.109	0.9135	++--+--	0.307	0.7587	??????+
17	ABCA10	4	MISSLOF	TRUE	0.01	233 (2)	81 (0)	1.02 [0.75-1.39]	0.89836	1.01 [0.74-1.38]	0.93998	58817 [0-5.2879E+199]	0.38772	-0.036	0.9709	+-	-0.077	0.939	+-	0.815	0.4152	+?	-0.141	0.8881	-+--+--	-0.157	0.8749	-+--+--	0.307	0.7587	??????+
17	ABCA10	7	MISSLOF	FALSE	0.01	345 (5)	105 (1)	1.11 [0.85-1.45]	0.44101	1.11 [0.85-1.46]	0.44603	1.23 [0.13-11.77]	0.85234	0.507	0.6119	+-	0.513	0.6078	+-	0.128	0.8984	+?	-0.131	0.8957	+---+--	-0.142	0.8868	+---+--	0.666	0.5056	+????++
2	ABCA12	3	LOF	-	0.0001	6 (0)	3 (0)	0.65 [0.14-3.01]	0.59366	0.65 [0.14-3.01]	0.59366	NA	NA	-0.579	0.5627	-+	-0.579	0.5627	-+	NA	NA	NA	0.017	0.9862	???+-++	0.017	0.9862	???+-++	NA	NA	NA
2	ABCA12	2	LOF	-	0.001	7 (0)	3 (0)	0.68 [0.15-3.08]	0.62819	0.68 [0.15-3.08]	0.62819	NA	NA	-0.495	0.6208	-+	-0.495	0.6208	-+	NA	NA	NA	0.096	0.9236	???+-++	0.096	0.9236	???+-++	NA	NA	NA
2	ABCA12	1	LOF	-	0.01	7 (0)	3 (0)	0.68 [0.15-3.08]	0.62819	0.68 [0.15-3.08]	0.62819	NA	NA	-0.495	0.6208	-+	-0.495	0.6208	-+	NA	NA	NA	0.096	0.9236	???+-++	0.096	0.9236	???+-++	NA	NA	NA
2	ABCA12	6	MISSLOF	TRUE	0.0001	116 (1)	44 (0)	0.93 [0.62-1.39]	0.71051	0.92 [0.61-1.39]	0.69172	12958 [0-5.9546E+171]	0.63033	0.375	0.7077	++	0.399	0.6899	++	0.467	0.6404	+?	-0.32	0.7493	+--+++-	-0.32	0.7493	+--+++-	0.274	0.7838	?????+?
2	ABCA12	9	MISSLOF	FALSE	0.0001	132 (2)	50 (0)	0.99 [0.68-1.46]	0.97361	0.98 [0.67-1.45]	0.93371	41358 [0-4.2239E+199]	0.46252	0.628	0.53	++	0.584	0.559	++	0.711	0.4771	+?	0.026	0.9794	+--+++-	0.026	0.9794	+--+++-	0.516	0.6061	?????+?
2	ABCA12	5	MISSLOF	TRUE	0.001	170 (2)	67 (0)	0.9 [0.64-1.25]	0.53015	0.88 [0.63-1.24]	0.48024	69849 [0-6.2513E+190]	0.33598	0.696	0.4863	++	0.764	0.4447	++	0.889	0.3742	+?	-0.401	0.6885	+-+--+-	-0.385	0.7	+-+--+-	0.568	0.5698	????++?
2	ABCA12	8	MISSLOF	FALSE	0.001	189 (3)	75 (0)	0.95 [0.69-1.31]	0.75877	0.94 [0.68-1.29]	0.68796	62357 [0-1.8572E+158]	0.26662	-0.297	0.7668	+-	-0.234	0.8146	+-	1.038	0.2994	+?	0.269	0.7878	+-+-++-	-0.104	0.917	+-+--+-	0.708	0.4788	????++?
2	ABCA12	4	MISSLOF	TRUE	0.01	372 (5)	158 (0)	1.01 [0.8-1.26]	0.9529	0.99 [0.79-1.25]	0.95848	177790 [0-3.2981E+200]	0.14099	0.031	0.975	-+	-0.015	0.9883	-+	1.336	0.1817	++	0.351	0.7254	+-++-+-	0.302	0.7626	+-++-+-	1.287	0.1982	???+++?
2	ABCA12	7	MISSLOF	FALSE	0.01	432 (6)	172 (0)	1.01 [0.82-1.26]	0.90004	1 [0.8-1.25]	0.99674	169830 [0-2.2823E+184]	0.11559	0.258	0.7962	++	0.235	0.8139	++	1.463	0.1436	++	0.48	0.6315	+-++-+-	0.429	0.6678	+-++-+-	1.362	0.1731	???+++?
7	ABCA13	3	LOF	-	0.0001	36 (0)	12 (0)	1.16 [0.55-2.45]	0.68895	1.16 [0.55-2.45]	0.68895	NA	NA	0.683	0.4944	++	0.683	0.4944	++	NA	NA	NA	0.445	0.6562	++-+--+	0.445	0.6562	++-+--+	NA	NA	NA
7	ABCA13	2	LOF	-	0.001	56 (1)	14 (0)	1.46 [0.74-2.88]	0.2609	1.46 [0.74-2.88]	0.26678	7771.4 [0-3.5713E+171]	0.70622	1.5	0.1337	+-	1.49	0.1361	+-	0.396	0.6921	+?	1.053	0.2925	++++--+	1.053	0.2925	++++--+	0.435	0.6637	??????+
7	ABCA13	1	LOF	-	0.01	71 (1)	17 (0)	1.81 [0.98-3.35]	0.048826	1.81 [0.98-3.35]	0.049574	7771.4 [0-3.5713E+171]	0.70622	2.212	0.02696	++	2.208	0.02722	++	0.396	0.6921	+?	1.998	0.04573	+++++-+	1.998	0.04573	+++++-+	0.435	0.6637	??????+
7	ABCA13	6	MISSLOF	TRUE	0.0001	188 (1)	64 (0)	1.1 [0.79-1.53]	0.58214	1.09 [0.78-1.52]	0.61866	53718 [0-2.4684E+172]	0.36456	0.63	0.5288	++	0.568	0.57	++	1.106	0.2689	?+	0.695	0.4869	-+++--+	0.648	0.5173	-+++--+	0.758	0.4482	????+??
7	ABCA13	9	MISSLOF	FALSE	0.0001	284 (2)	117 (0)	0.86 [0.66-1.12]	0.25946	0.84 [0.65-1.1]	0.20701	243880 [0-2.1934E+196]	0.11665	-0.256	0.7982	-+	-0.264	0.7919	-+	1.56	0.1187	++	-1.332	0.1828	-------	-1.414	0.1575	-------	1.131	0.2579	????+??
7	ABCA13	5	MISSLOF	TRUE	0.001	317 (4)	96 (1)	1.11 [0.85-1.46]	0.44483	1.11 [0.84-1.46]	0.45534	1.37 [0.14-13.82]	0.78354	0.913	0.3611	++	0.891	0.3731	++	0.723	0.4696	++	1.007	0.3138	++-++-+	1.061	0.2885	++-++-+	1.195	0.232	?-?++?+
7	ABCA13	8	MISSLOF	FALSE	0.001	465 (5)	168 (1)	0.94 [0.75-1.16]	0.55628	0.92 [0.74-1.15]	0.48991	2.39 [0.25-22.89]	0.4165	-0.5	0.6168	+-	-0.518	0.6044	+-	0.914	0.3607	++	-0.542	0.588	+---+++	-0.605	0.5451	+---+++	1.347	0.178	?-?++?+
7	ABCA13	4	MISSLOF	TRUE	0.01	832 (20)	281 (4)	1.16 [0.97-1.38]	0.097053	1.15 [0.96-1.38]	0.11771	1.67 [0.53-5.28]	0.36559	1.724	0.08476	++	1.594	0.1108	++	0.643	0.5199	+-	1.188	0.235	+-++--+	1.062	0.2882	+-++--+	1.147	0.2513	+-?+--+
7	ABCA13	7	MISSLOF	FALSE	0.01	1087 (26)	386 (4)	1.06 [0.91-1.25]	0.46133	1.05 [0.89-1.23]	0.58675	2.05 [0.66-6.36]	0.1844	0.752	0.4518	++	0.574	0.5662	++	1.279	0.2008	++	-0.423	0.6724	+-+--++	-0.131	0.896	+-+-+++	1.453	0.1461	++?+--+
9	ABCA2	3	LOF	-	0.0001	2 (0)	1 (0)	2.36 [0.16-34.88]	0.52251	2.36 [0.16-34.88]	0.52251	NA	NA	0.886	0.3756	+-	0.886	0.3756	+-	NA	NA	NA	0.385	0.7005	?-??+??	0.385	0.7005	?-??+??	NA	NA	NA
9	ABCA2	2	LOF	-	0.001	2 (0)	1 (0)	2.36 [0.16-34.88]	0.52251	2.36 [0.16-34.88]	0.52251	NA	NA	0.886	0.3756	+-	0.886	0.3756	+-	NA	NA	NA	0.385	0.7005	?-??+??	0.385	0.7005	?-??+??	NA	NA	NA
9	ABCA2	1	LOF	-	0.01	2 (0)	1 (0)	2.36 [0.16-34.88]	0.52251	2.36 [0.16-34.88]	0.52251	NA	NA	0.886	0.3756	+-	0.886	0.3756	+-	NA	NA	NA	0.385	0.7005	?-??+??	0.385	0.7005	?-??+??	NA	NA	NA
9	ABCA2	6	MISSLOF	TRUE	0.0001	94 (0)	30 (0)	1.21 [0.76-1.94]	0.4123	1.21 [0.76-1.94]	0.4123	NA	NA	1.107	0.2681	++	1.107	0.2681	++	NA	NA	NA	0.46	0.6457	---++--	0.46	0.6457	---++--	NA	NA	NA
9	ABCA2	9	MISSLOF	FALSE	0.0001	132 (0)	40 (0)	1.23 [0.82-1.84]	0.31187	1.23 [0.82-1.84]	0.31187	NA	NA	1.453	0.1461	++	1.453	0.1461	++	NA	NA	NA	0.808	0.4188	---++--	0.808	0.4188	---++--	NA	NA	NA
9	ABCA2	5	MISSLOF	TRUE	0.001	128 (0)	42 (0)	1.11 [0.74-1.66]	0.61493	1.11 [0.74-1.66]	0.61493	NA	NA	0.72	0.4713	++	0.72	0.4713	++	NA	NA	NA	0.383	0.7014	---++--	0.383	0.7014	---++--	NA	NA	NA
9	ABCA2	8	MISSLOF	FALSE	0.001	198 (0)	63 (0)	1.15 [0.83-1.59]	0.40816	1.15 [0.83-1.59]	0.40816	NA	NA	1.018	0.3086	++	1.018	0.3086	++	NA	NA	NA	0.68	0.4967	---++--	0.68	0.4967	---++--	NA	NA	NA
9	ABCA2	4	MISSLOF	TRUE	0.01	143 (0)	50 (0)	1.07 [0.74-1.55]	0.70612	1.07 [0.74-1.55]	0.70612	NA	NA	0.678	0.4976	++	0.678	0.4976	++	NA	NA	NA	0.162	0.8712	---++--	0.162	0.8712	---++--	NA	NA	NA
9	ABCA2	7	MISSLOF	FALSE	0.01	316 (2)	121 (0)	0.95 [0.74-1.23]	0.71356	0.95 [0.74-1.23]	0.69901	21716 [0-7.1737E+197]	0.58612	-0.378	0.7054	+-	-0.396	0.692	+-	0.479	0.6319	++	0.171	0.8639	---++--	0.177	0.8595	---++--	0.64	0.5218	???+??+
16	ABCA3	3	LOF	-	0.0001	3 (0)	1 (0)	0.26 [0.02-2.75]	0.31108	0.26 [0.02-2.75]	0.31108	NA	NA	-0.365	0.7151	+-	-0.365	0.7151	+-	NA	NA	NA	-1.052	0.2928	?+?-??+	-1.052	0.2928	?+?-??+	NA	NA	NA
16	ABCA3	2	LOF	-	0.001	3 (0)	1 (0)	0.26 [0.02-2.75]	0.31108	0.26 [0.02-2.75]	0.31108	NA	NA	-0.365	0.7151	+-	-0.365	0.7151	+-	NA	NA	NA	-1.052	0.2928	?+?-??+	-1.052	0.2928	?+?-??+	NA	NA	NA
16	ABCA3	1	LOF	-	0.01	3 (0)	1 (0)	0.26 [0.02-2.75]	0.31108	0.26 [0.02-2.75]	0.31108	NA	NA	-0.365	0.7151	+-	-0.365	0.7151	+-	NA	NA	NA	-1.052	0.2928	?+?-??+	-1.052	0.2928	?+?-??+	NA	NA	NA
16	ABCA3	6	MISSLOF	TRUE	0.0001	77 (1)	29 (0)	0.82 [0.5-1.34]	0.43485	0.81 [0.49-1.33]	0.40628	18741 [0-8.6117E+171]	0.56746	0.674	0.5004	++	0.72	0.4718	++	0.553	0.5803	+?	-0.653	0.5138	+++-+-+	-0.691	0.4895	+++---+	0.582	0.5606	????+??
16	ABCA3	9	MISSLOF	FALSE	0.0001	109 (1)	44 (0)	0.83 [0.55-1.26]	0.38787	0.82 [0.54-1.25]	0.36609	18741 [0-8.6117E+171]	0.56746	-0.804	0.4216	-+	-0.849	0.3957	-+	0.553	0.5803	+?	-0.856	0.3918	+++---+	-0.909	0.3635	+++---+	0.582	0.5606	????+??
16	ABCA3	5	MISSLOF	TRUE	0.001	143 (3)	51 (0)	0.91 [0.63-1.31]	0.61055	0.88 [0.6-1.28]	0.50748	257510 [0-2.731E+239]	0.17225	-0.457	0.6474	+-	-0.586	0.5579	+-	1.26	0.2077	+?	-0.595	0.5522	-++-+-+	-0.643	0.5199	-++-+-+	0.935	0.3498	????+??
16	ABCA3	8	MISSLOF	FALSE	0.001	203 (4)	78 (0)	0.89 [0.65-1.21]	0.45265	0.87 [0.63-1.18]	0.36815	216980 [0-6.5507E+210]	0.14892	0.779	0.4357	++	0.917	0.359	++	1.343	0.1794	+?	-0.891	0.3727	-++-+-+	-0.949	0.3427	-++-+-+	0.889	0.3738	????++?
16	ABCA3	4	MISSLOF	TRUE	0.01	197 (3)	71 (0)	1.1 [0.8-1.51]	0.55609	1.08 [0.78-1.49]	0.63122	257510 [0-2.731E+239]	0.17225	0.659	0.5098	++	0.563	0.5735	++	1.26	0.2077	+?	0.533	0.5943	-++-+-+	0.5	0.6171	-++-+-+	0.935	0.3498	????+??
16	ABCA3	7	MISSLOF	FALSE	0.01	345 (5)	135 (1)	1.02 [0.81-1.3]	0.85297	1.02 [0.8-1.3]	0.88622	1.56 [0.16-15.24]	0.69027	-0.003	0.9978	+-	-0.02	0.9843	+-	0.242	0.8091	+?	0.04	0.9681	-++-+++	0.036	0.9713	-++-+++	-0.324	0.7461	???-++?
1	ABCA4	3	LOF	-	0.0001	6 (0)	4 (0)	0.47 [0.12-1.83]	0.28633	0.47 [0.12-1.83]	0.28633	NA	NA	-0.629	0.5292	+-	-0.629	0.5292	+-	NA	NA	NA	-0.662	0.5081	?+?-???	-0.662	0.5081	?+?-???	NA	NA	NA
1	ABCA4	2	LOF	-	0.001	6 (0)	4 (0)	0.47 [0.12-1.83]	0.28633	0.47 [0.12-1.83]	0.28633	NA	NA	-0.629	0.5292	+-	-0.629	0.5292	+-	NA	NA	NA	-0.662	0.5081	?+?-???	-0.662	0.5081	?+?-???	NA	NA	NA
1	ABCA4	1	LOF	-	0.01	6 (0)	4 (0)	0.47 [0.12-1.83]	0.28633	0.47 [0.12-1.83]	0.28633	NA	NA	-0.629	0.5292	+-	-0.629	0.5292	+-	NA	NA	NA	-0.662	0.5081	?+?-???	-0.662	0.5081	?+?-???	NA	NA	NA
1	ABCA4	6	MISSLOF	TRUE	0.0001	114 (2)	41 (0)	0.98 [0.65-1.49]	0.94036	0.97 [0.64-1.47]	0.88103	58024 [0-6.7238E+194]	0.38189	0.07	0.9438	++	0.14	0.8885	++	0.849	0.3957	+?	0.78	0.4353	-+--+++	0.706	0.48	-+--+++	1.017	0.3092	????+??
1	ABCA4	9	MISSLOF	FALSE	0.0001	134 (2)	44 (0)	1.12 [0.76-1.66]	0.55284	1.11 [0.75-1.65]	0.59364	58024 [0-6.7238E+194]	0.38189	0.723	0.4697	++	0.668	0.504	++	0.849	0.3957	+?	1.22	0.2224	-+-++++	1.164	0.2444	-+-++++	1.017	0.3092	????+??
1	ABCA4	5	MISSLOF	TRUE	0.001	203 (3)	92 (0)	0.71 [0.53-0.95]	0.022886	0.69 [0.51-0.93]	0.014658	104820 [0-1.6239E+154]	0.16092	-2.197	0.028	--	-2.357	0.01842	--	1.339	0.1806	+?	-1.262	0.207	-+--++-	-1.725	0.08454	-+---+-	1.546	0.1222	????+??
1	ABCA4	8	MISSLOF	FALSE	0.001	246 (4)	97 (0)	0.83 [0.63-1.1]	0.20652	0.81 [0.61-1.08]	0.15619	225900 [0-4.1616E+215]	0.14098	0.586	0.5581	+-	0.73	0.4655	+-	1.408	0.1592	+?	-0.489	0.6252	-+--++-	-0.587	0.557	-+--++-	1.646	0.09981	????+??
1	ABCA4	4	MISSLOF	TRUE	0.01	509 (7)	216 (1)	0.87 [0.71-1.06]	0.16814	0.85 [0.7-1.05]	0.13369	2.53 [0.28-23.08]	0.37077	-1.319	0.1871	--	-1.414	0.1575	--	0.763	0.4453	+?	-1.131	0.2579	+---++-	-1.2	0.2302	+---++-	1.128	0.2592	??+++??
1	ABCA4	7	MISSLOF	FALSE	0.01	651 (10)	252 (1)	0.91 [0.75-1.09]	0.30745	0.89 [0.74-1.08]	0.25315	2.73 [0.31-24.16]	0.31986	-0.857	0.3916	+-	-0.949	0.3428	+-	0.878	0.3801	+?	-0.318	0.7507	+-+-++-	-0.894	0.3714	+---++-	1.189	0.2344	??+++??
17	ABCA5	3	LOF	-	0.0001	8 (0)	0 (0)	7.39 [0.26-212.56]	0.1062	7.39 [0.26-212.56]	0.1062	NA	NA	2.054	0.04002	++	2.054	0.04002	++	NA	NA	NA	2.018	0.04358	?+?+???	2.018	0.04358	?+?+???	NA	NA	NA
17	ABCA5	2	LOF	-	0.001	9 (0)	0 (0)	9.35 [0.37-238.47]	0.051881	9.35 [0.37-238.47]	0.051881	NA	NA	1.849	0.0644	++	1.849	0.0644	++	NA	NA	NA	2.054	0.04002	?+?++??	2.054	0.04002	?+?++??	NA	NA	NA
17	ABCA5	1	LOF	-	0.01	9 (0)	0 (0)	9.35 [0.37-238.47]	0.051881	9.35 [0.37-238.47]	0.051881	NA	NA	1.849	0.0644	++	1.849	0.0644	++	NA	NA	NA	2.054	0.04002	?+?++??	2.054	0.04002	?+?++??	NA	NA	NA
17	ABCA5	6	MISSLOF	TRUE	0.0001	70 (0)	21 (0)	1.55 [0.88-2.73]	0.11693	1.55 [0.88-2.73]	0.11693	NA	NA	1.762	0.07804	++	1.762	0.07804	++	NA	NA	NA	2.038	0.04157	++++-++	2.038	0.04157	++++-++	NA	NA	NA
17	ABCA5	9	MISSLOF	FALSE	0.0001	74 (0)	23 (0)	1.5 [0.87-2.57]	0.13688	1.5 [0.87-2.57]	0.13688	NA	NA	1.727	0.08411	++	1.727	0.08411	++	NA	NA	NA	2.027	0.04267	++++-++	2.027	0.04267	++++-++	NA	NA	NA
17	ABCA5	5	MISSLOF	TRUE	0.001	138 (1)	40 (1)	1.46 [0.98-2.16]	0.058537	1.49 [0.99-2.24]	0.051777	1.01 [0.06-16.3]	0.99533	2.064	0.039	++	1.998	0.0457	++	-0.711	0.4768	?-	1.647	0.09961	++++--+	1.966	0.04927	++++-++	-0.449	0.6537	?????-?
17	ABCA5	8	MISSLOF	FALSE	0.001	146 (1)	45 (1)	1.37 [0.94-2]	0.098076	1.39 [0.94-2.05]	0.089742	1.01 [0.06-16.3]	0.99533	1.93	0.05355	++	1.86	0.06286	++	-0.711	0.4768	?-	1.326	0.1848	++++--+	1.764	0.07769	++++-++	-0.449	0.6537	?????-?
17	ABCA5	4	MISSLOF	TRUE	0.01	207 (4)	59 (1)	1.3 [0.93-1.82]	0.11501	1.32 [0.93-1.85]	0.11255	1.31 [0.11-16.15]	0.83115	1.135	0.2565	+-	1.737	0.08247	++	0.195	0.8455	+-	1.368	0.1712	++++--+	1.385	0.1662	++++--+	-0.449	0.6537	?????-?
17	ABCA5	7	MISSLOF	FALSE	0.01	215 (4)	64 (1)	1.25 [0.91-1.73]	0.16417	1.26 [0.91-1.76]	0.16268	1.31 [0.11-16.15]	0.83115	1.253	0.2101	+-	1.292	0.1965	+-	0.195	0.8455	+-	1.201	0.2296	++++--+	1.229	0.2192	++++--+	-0.449	0.6537	?????-?
17	ABCA6	3	LOF	-	0.0001	2 (0)	7 (0)	0.04 [0.01-0.29]	0.00024672	0.04 [0.01-0.29]	0.00024672	NA	NA	-3.951	7.796e-05	--	-3.951	7.796e-05	--	NA	NA	NA	-3.266	0.001091	?+?----	-3.266	0.001091	?+?----	NA	NA	NA
17	ABCA6	2	LOF	-	0.001	3 (0)	7 (0)	0.07 [0.01-0.34]	0.00049713	0.07 [0.01-0.34]	0.00049713	NA	NA	-3.683	0.0002306	--	-3.683	0.0002306	--	NA	NA	NA	-3.044	0.002336	?+?----	-3.044	0.002336	?+?----	NA	NA	NA
17	ABCA6	1	LOF	-	0.01	3 (0)	7 (0)	0.07 [0.01-0.34]	0.00049713	0.07 [0.01-0.34]	0.00049713	NA	NA	-3.683	0.0002306	--	-3.683	0.0002306	--	NA	NA	NA	-3.044	0.002336	?+?----	-3.044	0.002336	?+?----	NA	NA	NA
17	ABCA6	6	MISSLOF	TRUE	0.0001	45 (0)	27 (0)	0.5 [0.29-0.87]	0.016288	0.5 [0.29-0.87]	0.016288	NA	NA	-2.489	0.01281	--	-2.489	0.01281	--	NA	NA	NA	-2.432	0.01503	+-+----	-2.432	0.01503	+-+----	NA	NA	NA
17	ABCA6	9	MISSLOF	FALSE	0.0001	60 (0)	36 (0)	0.53 [0.33-0.86]	0.010951	0.53 [0.33-0.86]	0.010951	NA	NA	-2.641	0.008269	--	-2.641	0.008269	--	NA	NA	NA	-2.73	0.006325	+-+----	-2.73	0.006325	+-+----	NA	NA	NA
17	ABCA6	5	MISSLOF	TRUE	0.001	111 (0)	50 (1)	0.78 [0.53-1.16]	0.221	0.8 [0.53-1.18]	0.26336	0 [0-2.8216E+162]	0.17209	-1.091	0.2752	--	-0.976	0.3292	--	-1.424	0.1543	-?	-1.115	0.2648	+++----	-1.088	0.2767	+++----	-0.937	0.349	????-??
17	ABCA6	8	MISSLOF	FALSE	0.001	134 (0)	63 (1)	0.74 [0.52-1.06]	0.10253	0.75 [0.53-1.08]	0.12331	0 [0-2.8216E+162]	0.17209	-1.495	0.135	--	-1.394	0.1634	--	-1.424	0.1543	-?	-1.531	0.1257	+-+----	-1.527	0.1267	+-+----	-0.937	0.349	????-??
17	ABCA6	4	MISSLOF	TRUE	0.01	232 (7)	84 (1)	0.8 [0.59-1.09]	0.16091	0.81 [0.59-1.1]	0.17453	0.44 [0.04-5.43]	0.5452	1.331	0.1832	++	1.304	0.1921	++	1.058	0.2901	++	-2.019	0.04344	+++----	-2.03	0.04235	+++----	-0.592	0.5535	????-?+
17	ABCA6	7	MISSLOF	FALSE	0.01	254 (7)	97 (1)	0.77 [0.58-1.03]	0.076474	0.77 [0.58-1.03]	0.082912	0.44 [0.04-5.43]	0.5452	1.692	0.09064	++	0.566	0.5713	+-	1.058	0.2901	++	-2.373	0.01765	+-+----	-2.4	0.0164	+-+----	-0.592	0.5535	????-?+
19	ABCA7	3	LOF	-	0.0001	24 (0)	5 (0)	1.8 [0.59-5.51]	0.28537	1.8 [0.59-5.51]	0.28537	NA	NA	1.099	0.2716	++	1.099	0.2716	++	NA	NA	NA	1.368	0.1714	-+++++-	1.368	0.1714	-+++++-	NA	NA	NA
19	ABCA7	2	LOF	-	0.001	33 (0)	9 (0)	1.53 [0.66-3.55]	0.31556	1.53 [0.66-3.55]	0.31556	NA	NA	1.006	0.3145	++	1.006	0.3145	++	NA	NA	NA	1.392	0.164	-+++++-	1.392	0.164	-+++++-	NA	NA	NA
19	ABCA7	1	LOF	-	0.01	37 (0)	15 (0)	0.99 [0.49-1.97]	0.96857	0.99 [0.49-1.97]	0.96857	NA	NA	-0.034	0.973	+-	-0.034	0.973	+-	NA	NA	NA	-0.083	0.9338	--+-++-	-0.083	0.9338	--+-++-	NA	NA	NA
19	ABCA7	6	MISSLOF	TRUE	0.0001	33 (0)	5 (0)	2.47 [0.87-7.08]	0.069225	2.47 [0.87-7.08]	0.069225	NA	NA	1.775	0.07592	++	1.775	0.07592	++	NA	NA	NA	1.712	0.08686	-+++++-	1.712	0.08686	-+++++-	NA	NA	NA
19	ABCA7	9	MISSLOF	FALSE	0.0001	211 (0)	66 (0)	1.08 [0.78-1.49]	0.6573	1.08 [0.78-1.49]	0.6573	NA	NA	0.563	0.5732	++	0.563	0.5732	++	NA	NA	NA	1.15	0.2503	-++++++	1.15	0.2503	-++++++	NA	NA	NA
19	ABCA7	5	MISSLOF	TRUE	0.001	45 (0)	14 (0)	1.37 [0.69-2.72]	0.36242	1.37 [0.69-2.72]	0.36242	NA	NA	0.896	0.3704	+-	0.896	0.3704	+-	NA	NA	NA	1.306	0.1916	-++-++-	1.306	0.1916	-++-++-	NA	NA	NA
19	ABCA7	8	MISSLOF	FALSE	0.001	358 (0)	130 (1)	0.99 [0.77-1.26]	0.92852	0.99 [0.78-1.27]	0.95295	0 [0-1.3136E+163]	0.44944	0.075	0.9402	+-	0.036	0.9714	+-	-0.898	0.3691	-?	0.381	0.7031	-+--+-+	0.466	0.6409	-+--+-+	-1.551	0.1208	?????-?
19	ABCA7	4	MISSLOF	TRUE	0.01	51 (0)	22 (0)	0.93 [0.52-1.66]	0.80959	0.93 [0.52-1.66]	0.80959	NA	NA	-0.294	0.7687	+-	-0.294	0.7687	+-	NA	NA	NA	0.077	0.9382	--+-++-	0.077	0.9382	--+-++-	NA	NA	NA
19	ABCA7	7	MISSLOF	FALSE	0.01	546 (4)	193 (4)	0.92 [0.74-1.13]	0.41593	0.94 [0.76-1.16]	0.56262	0.16 [0.03-0.81]	0.028394	0.69	0.4903	+-	0.461	0.645	+-	-2.115	0.03446	-?	-0.039	0.9691	-+--+-+	0.023	0.9815	-+--+-+	0.16	0.873	+??++-?
17	ABCA8	3	LOF	-	0.0001	11 (0)	10 (0)	0.37 [0.13-1.03]	0.061404	0.37 [0.13-1.03]	0.061404	NA	NA	-1.762	0.07802	--	-1.762	0.07802	--	NA	NA	NA	-1.049	0.2942	+?---++	-1.049	0.2942	+?---++	NA	NA	NA
17	ABCA8	2	LOF	-	0.001	30 (0)	23 (0)	0.46 [0.24-0.86]	0.015176	0.46 [0.24-0.86]	0.015176	NA	NA	-2.357	0.01841	--	-2.357	0.01841	--	NA	NA	NA	-1.773	0.07621	-----++	-1.773	0.07621	-----++	NA	NA	NA
17	ABCA8	1	LOF	-	0.01	76 (1)	28 (0)	0.6 [0.36-1.01]	0.057697	0.59 [0.35-0.99]	0.050799	12962 [0-5.9565E+171]	0.63044	1.993	0.04624	++	-1.935	0.05304	-+	0.41	0.682	+?	-1.171	0.2417	-+---++	-1.156	0.2478	-+---++	0.395	0.6929	?+?????
17	ABCA8	6	MISSLOF	TRUE	0.0001	72 (0)	38 (0)	0.76 [0.48-1.21]	0.24759	0.76 [0.48-1.21]	0.24759	NA	NA	-0.961	0.3365	--	-0.961	0.3365	--	NA	NA	NA	-1.179	0.2384	-+-----	-1.179	0.2384	-+-----	NA	NA	NA
17	ABCA8	9	MISSLOF	FALSE	0.0001	94 (0)	47 (0)	0.85 [0.56-1.28]	0.43538	0.85 [0.56-1.28]	0.43538	NA	NA	-0.606	0.5445	-+	-0.606	0.5445	-+	NA	NA	NA	-0.624	0.5325	-+-+---	-0.624	0.5325	-+-+---	NA	NA	NA
17	ABCA8	5	MISSLOF	TRUE	0.001	156 (0)	75 (1)	0.78 [0.56-1.08]	0.1351	0.78 [0.56-1.09]	0.1461	0 [0-9.4905E+162]	0.38485	-1.267	0.2053	--	-1.235	0.2167	--	-0.796	0.4263	?-	-1.759	0.07864	-------	-1.716	0.08608	-------	-0.789	0.4303	???-???
17	ABCA8	8	MISSLOF	FALSE	0.001	211 (0)	102 (1)	0.79 [0.6-1.06]	0.1142	0.8 [0.6-1.06]	0.1228	0 [0-9.4905E+162]	0.38485	-1.408	0.1592	--	-1.432	0.1522	--	-0.796	0.4263	?-	-1.539	0.1238	-+---+-	-1.502	0.1331	-+---+-	-0.789	0.4303	???-???
17	ABCA8	4	MISSLOF	TRUE	0.01	379 (5)	135 (5)	0.85 [0.67-1.09]	0.20253	0.87 [0.68-1.12]	0.2866	0.35 [0.09-1.42]	0.14708	-0.105	0.9165	+-	-0.232	0.8163	+-	-1.574	0.1155	--	-1.199	0.2307	-+++---	-0.948	0.343	-+++-+-	-1.713	0.08666	--?-?-?
17	ABCA8	7	MISSLOF	FALSE	0.01	501 (7)	191 (5)	0.85 [0.69-1.05]	0.12431	0.86 [0.69-1.06]	0.16221	0.47 [0.13-1.68]	0.25537	1.415	0.1571	++	1.276	0.202	++	-1.23	0.2186	--	-1.231	0.2185	-+---+-	-1.118	0.2638	-+---+-	-1.549	0.1214	--+-?-?
17	ABCA9	3	LOF	-	0.0001	12 (0)	9 (0)	0.51 [0.19-1.41]	0.20082	0.51 [0.19-1.41]	0.20082	NA	NA	-0.696	0.4862	+-	-0.696	0.4862	+-	NA	NA	NA	-1.439	0.1502	+-?--++	-1.439	0.1502	+-?--++	NA	NA	NA
17	ABCA9	2	LOF	-	0.001	20 (0)	13 (0)	0.8 [0.36-1.8]	0.59553	0.8 [0.36-1.8]	0.59553	NA	NA	-0.917	0.359	--	-0.917	0.359	--	NA	NA	NA	-0.468	0.64	+-?--++	-0.468	0.64	+-?--++	NA	NA	NA
17	ABCA9	1	LOF	-	0.01	20 (0)	13 (0)	0.8 [0.36-1.8]	0.59553	0.8 [0.36-1.8]	0.59553	NA	NA	-0.917	0.359	--	-0.917	0.359	--	NA	NA	NA	-0.468	0.64	+-?--++	-0.468	0.64	+-?--++	NA	NA	NA
17	ABCA9	6	MISSLOF	TRUE	0.0001	62 (2)	28 (0)	0.99 [0.59-1.65]	0.97273	0.93 [0.55-1.58]	0.7794	259340 [0-8.6066E+191]	0.10888	0.275	0.7837	+-	0.096	0.9236	+-	1.492	0.1358	+?	0.763	0.4454	+-+-+++	0.401	0.6884	+-+-+++	1.697	0.0897	???+???
17	ABCA9	9	MISSLOF	FALSE	0.0001	101 (2)	44 (0)	1.03 [0.68-1.56]	0.88458	0.99 [0.65-1.51]	0.96491	259340 [0-8.6066E+191]	0.10888	0.421	0.6741	+-	0.278	0.7813	+-	1.492	0.1358	+?	-0.133	0.8943	+-+-+-+	0.134	0.893	+-+-+-+	1.697	0.0897	???+???
17	ABCA9	5	MISSLOF	TRUE	0.001	93 (2)	42 (0)	1.06 [0.69-1.61]	0.79319	1.02 [0.66-1.56]	0.94205	259340 [0-8.6066E+191]	0.10888	0.42	0.6746	+-	0.256	0.7977	+-	1.492	0.1358	+?	-0.25	0.8027	+-+-+-+	-0.01	0.992	+-+-+-+	1.697	0.0897	???+???
17	ABCA9	8	MISSLOF	FALSE	0.001	157 (2)	70 (0)	0.96 [0.69-1.34]	0.82806	0.94 [0.67-1.31]	0.7063	259340 [0-8.6066E+191]	0.10888	-0.007	0.9941	+-	-0.144	0.8856	+-	1.492	0.1358	+?	-0.826	0.4087	+-+-+-+	-0.619	0.5358	+-+-+-+	1.697	0.0897	???+???
17	ABCA9	4	MISSLOF	TRUE	0.01	212 (4)	91 (0)	0.94 [0.7-1.26]	0.68563	0.92 [0.68-1.23]	0.56056	328460 [0-5.9512E+203]	0.082369	-0.449	0.6535	--	-0.618	0.5367	--	1.646	0.09978	+?	-0.61	0.5416	+-+---+	-0.833	0.4047	+-+---+	1.748	0.08053	+??+?+?
17	ABCA9	7	MISSLOF	FALSE	0.01	304 (6)	125 (1)	0.92 [0.72-1.19]	0.54432	0.91 [0.7-1.18]	0.46677	2.42 [0.25-23.67]	0.41587	0.05	0.9603	+-	0.159	0.8734	+-	0.759	0.4477	+?	-0.904	0.3661	+-+-+--	-0.912	0.362	+-+-+--	1.748	0.08053	+??+?+?
7	ABCB1	3	LOF	-	0.0001	1 (0)	4 (0)	0.07 [0.01-0.89]	0.016933	0.07 [0.01-0.89]	0.016933	NA	NA	-2.288	0.02212	--	-2.288	0.02212	--	NA	NA	NA	-1.88	0.06013	?+?-???	-1.88	0.06013	?+?-???	NA	NA	NA
7	ABCB1	2	LOF	-	0.001	1 (0)	4 (0)	0.07 [0.01-0.89]	0.016933	0.07 [0.01-0.89]	0.016933	NA	NA	-2.288	0.02212	--	-2.288	0.02212	--	NA	NA	NA	-1.88	0.06013	?+?-???	-1.88	0.06013	?+?-???	NA	NA	NA
7	ABCB1	1	LOF	-	0.01	1 (0)	4 (0)	0.07 [0.01-0.89]	0.016933	0.07 [0.01-0.89]	0.016933	NA	NA	-2.288	0.02212	--	-2.288	0.02212	--	NA	NA	NA	-1.88	0.06013	?+?-???	-1.88	0.06013	?+?-???	NA	NA	NA
7	ABCB1	6	MISSLOF	TRUE	0.0001	43 (1)	22 (1)	0.64 [0.36-1.13]	0.13192	0.65 [0.35-1.19]	0.1684	0.18 [0.01-3.7]	0.28401	-0.674	0.5002	+-	-0.895	0.3705	+-	-1.127	0.2598	-?	-0.5	0.6168	+++--++	-0.417	0.6764	+++--++	-0.867	0.386	????-?+
7	ABCB1	9	MISSLOF	FALSE	0.0001	51 (1)	24 (1)	0.72 [0.42-1.25]	0.24733	0.74 [0.42-1.32]	0.30999	0.18 [0.01-3.7]	0.28401	-0.779	0.436	+-	-0.554	0.5796	+-	-1.127	0.2598	-?	-0.303	0.7622	+++--++	-0.22	0.8262	+++--++	-0.867	0.386	????-?+
7	ABCB1	5	MISSLOF	TRUE	0.001	69 (1)	32 (1)	0.63 [0.39-1.02]	0.064618	0.64 [0.39-1.05]	0.081332	0.18 [0.01-3.7]	0.28401	-0.154	0.8775	+-	-0.303	0.7619	+-	-1.127	0.2598	-?	-0.942	0.3464	+++--++	-0.856	0.3921	+++--++	-0.867	0.386	????-?+
7	ABCB1	8	MISSLOF	FALSE	0.001	80 (1)	34 (1)	0.71 [0.45-1.13]	0.15286	0.72 [0.45-1.17]	0.18899	0.18 [0.01-3.7]	0.28401	-0.548	0.5836	+-	-0.706	0.4802	+-	-1.127	0.2598	-?	-0.517	0.605	+++--++	-0.431	0.6662	+++--++	-0.867	0.386	????-?+
7	ABCB1	4	MISSLOF	TRUE	0.01	197 (2)	71 (2)	0.87 [0.63-1.2]	0.40805	0.89 [0.64-1.23]	0.48402	0.31 [0.03-2.74]	0.29708	-0.966	0.3339	+-	-0.803	0.422	+-	-1.125	0.2604	-?	-0.757	0.4492	+-+--++	-0.759	0.4477	+-+--++	-1.267	0.2053	?-??-?+
7	ABCB1	7	MISSLOF	FALSE	0.01	244 (2)	77 (2)	0.9 [0.66-1.22]	0.50861	0.92 [0.67-1.26]	0.59298	0.31 [0.03-2.74]	0.29708	-0.752	0.4521	+-	-0.594	0.5524	+-	-1.125	0.2604	-?	-0.15	0.8807	+++--++	-0.032	0.9741	+++--++	-1.267	0.2053	?-??-?+
1	ABCB10	6	MISSLOF	TRUE	0.0001	22 (0)	8 (0)	1.26 [0.48-3.28]	0.63789	1.26 [0.48-3.28]	0.63789	NA	NA	0.249	0.803	+-	0.249	0.803	+-	NA	NA	NA	-0.077	0.9385	+-+-+++	-0.077	0.9385	+-+-+++	NA	NA	NA
1	ABCB10	9	MISSLOF	FALSE	0.0001	31 (0)	13 (0)	1.07 [0.49-2.31]	0.87216	1.07 [0.49-2.31]	0.87216	NA	NA	-0.005	0.9962	+-	-0.005	0.9962	+-	NA	NA	NA	0.055	0.9565	+-+--++	0.055	0.9565	+-+--++	NA	NA	NA
1	ABCB10	5	MISSLOF	TRUE	0.001	26 (0)	9 (0)	1.2 [0.48-2.98]	0.69499	1.2 [0.48-2.98]	0.69499	NA	NA	0.188	0.8513	+-	0.188	0.8513	+-	NA	NA	NA	-0.109	0.9132	+++-++-	-0.109	0.9132	+++-++-	NA	NA	NA
1	ABCB10	8	MISSLOF	FALSE	0.001	39 (0)	14 (0)	1.27 [0.61-2.62]	0.52235	1.27 [0.61-2.62]	0.52235	NA	NA	0.472	0.6372	+-	0.472	0.6372	+-	NA	NA	NA	0.253	0.8	+-+--+-	0.253	0.8	+-+--+-	NA	NA	NA
1	ABCB10	4	MISSLOF	TRUE	0.01	26 (0)	9 (0)	1.2 [0.48-2.98]	0.69499	1.2 [0.48-2.98]	0.69499	NA	NA	0.188	0.8513	+-	0.188	0.8513	+-	NA	NA	NA	-0.109	0.9132	+++-++-	-0.109	0.9132	+++-++-	NA	NA	NA
1	ABCB10	7	MISSLOF	FALSE	0.01	39 (0)	14 (0)	1.27 [0.61-2.62]	0.52235	1.27 [0.61-2.62]	0.52235	NA	NA	0.472	0.6372	+-	0.472	0.6372	+-	NA	NA	NA	0.253	0.8	+-+--+-	0.253	0.8	+-+--+-	NA	NA	NA
2	ABCB11	3	LOF	-	0.0001	3 (0)	0 (0)	60175 [0-7.5521E+163]	0.28445	60175 [0-7.5521E+163]	0.28445	NA	NA	1.106	0.2688	++	1.106	0.2688	++	NA	NA	NA	1.337	0.1811	++?????	1.337	0.1811	++?????	NA	NA	NA
2	ABCB11	2	LOF	-	0.001	3 (0)	0 (0)	60175 [0-7.5521E+163]	0.28445	60175 [0-7.5521E+163]	0.28445	NA	NA	1.106	0.2688	++	1.106	0.2688	++	NA	NA	NA	1.337	0.1811	++?????	1.337	0.1811	++?????	NA	NA	NA
2	ABCB11	1	LOF	-	0.01	3 (0)	0 (0)	60175 [0-7.5521E+163]	0.28445	60175 [0-7.5521E+163]	0.28445	NA	NA	1.106	0.2688	++	1.106	0.2688	++	NA	NA	NA	1.337	0.1811	++?????	1.337	0.1811	++?????	NA	NA	NA
2	ABCB11	6	MISSLOF	TRUE	0.0001	55 (1)	24 (0)	0.68 [0.39-1.16]	0.16485	0.64 [0.37-1.12]	0.12612	56065 [0-2.5763E+172]	0.35613	-0.323	0.7467	+-	-0.208	0.835	+-	0.884	0.3769	+?	-1.066	0.2863	--+-++-	-1.111	0.2664	--+-++-	0.754	0.4506	????+??
2	ABCB11	9	MISSLOF	FALSE	0.0001	61 (1)	27 (0)	0.7 [0.42-1.17]	0.17754	0.67 [0.39-1.13]	0.13923	56065 [0-2.5763E+172]	0.35613	-0.5	0.6172	+-	-0.396	0.6921	+-	0.884	0.3769	+?	-0.942	0.346	--+-++-	-1.036	0.3003	--+--+-	0.754	0.4506	????+??
2	ABCB11	5	MISSLOF	TRUE	0.001	101 (1)	37 (0)	0.89 [0.57-1.37]	0.58861	0.87 [0.56-1.35]	0.52949	56065 [0-2.5763E+172]	0.35613	-0.704	0.4812	+-	-0.771	0.4405	+-	0.884	0.3769	+?	0.065	0.9485	---++++	0.065	0.9484	---++++	0.754	0.4506	????+??
2	ABCB11	8	MISSLOF	FALSE	0.001	125 (1)	43 (0)	0.96 [0.64-1.44]	0.85015	0.95 [0.63-1.42]	0.79209	56065 [0-2.5763E+172]	0.35613	-0.286	0.7747	+-	-0.342	0.7327	+-	0.884	0.3769	+?	0.222	0.8244	---++++	0.185	0.8532	---++++	0.754	0.4506	????+??
2	ABCB11	4	MISSLOF	TRUE	0.01	137 (2)	55 (0)	0.79 [0.54-1.14]	0.2065	0.77 [0.53-1.12]	0.1738	65627 [0-1.6001E+178]	0.32981	-1.007	0.3139	+-	-0.934	0.3505	+-	0.935	0.3496	+?	-0.768	0.4424	----+++	-0.84	0.4011	----+++	0.902	0.3672	?+??+??
2	ABCB11	7	MISSLOF	FALSE	0.01	162 (2)	63 (0)	0.83 [0.58-1.17]	0.27953	0.81 [0.57-1.15]	0.24321	65627 [0-1.6001E+178]	0.32981	-1.084	0.2783	+-	-1.147	0.2515	+-	0.935	0.3496	+?	-0.535	0.5923	----+++	-0.59	0.5552	----+++	0.902	0.3672	?+??+??
7	ABCB4	3	LOF	-	0.0001	2 (0)	2 (0)	0.86 [0.08-9.55]	0.90238	0.86 [0.08-9.55]	0.90238	NA	NA	-0.202	0.8402	-?	-0.202	0.8402	-?	NA	NA	NA	-0.23	0.8183	??+-???	-0.23	0.8183	??+-???	NA	NA	NA
7	ABCB4	2	LOF	-	0.001	2 (0)	2 (0)	0.86 [0.08-9.55]	0.90238	0.86 [0.08-9.55]	0.90238	NA	NA	-0.202	0.8402	-?	-0.202	0.8402	-?	NA	NA	NA	-0.23	0.8183	??+-???	-0.23	0.8183	??+-???	NA	NA	NA
7	ABCB4	1	LOF	-	0.01	2 (0)	2 (0)	0.86 [0.08-9.55]	0.90238	0.86 [0.08-9.55]	0.90238	NA	NA	-0.202	0.8402	-?	-0.202	0.8402	-?	NA	NA	NA	-0.23	0.8183	??+-???	-0.23	0.8183	??+-???	NA	NA	NA
7	ABCB4	6	MISSLOF	TRUE	0.0001	45 (0)	17 (0)	1.08 [0.58-2.02]	0.81369	1.08 [0.58-2.02]	0.81369	NA	NA	0.016	0.9872	-+	0.016	0.9872	-+	NA	NA	NA	0.188	0.8508	+-+-+-+	0.188	0.8508	+-+-+-+	NA	NA	NA
7	ABCB4	9	MISSLOF	FALSE	0.0001	57 (0)	22 (0)	0.95 [0.54-1.66]	0.86148	0.95 [0.54-1.66]	0.86148	NA	NA	-0.272	0.7853	+-	-0.272	0.7853	+-	NA	NA	NA	-0.081	0.9354	+-+-+-+	-0.081	0.9354	+-+-+-+	NA	NA	NA
7	ABCB4	5	MISSLOF	TRUE	0.001	79 (0)	29 (0)	1.15 [0.71-1.88]	0.55817	1.15 [0.71-1.88]	0.55817	NA	NA	0.388	0.6978	++	0.388	0.6978	++	NA	NA	NA	0.788	0.4307	+-+++-+	0.788	0.4307	+-+++-+	NA	NA	NA
7	ABCB4	8	MISSLOF	FALSE	0.001	108 (0)	48 (0)	0.91 [0.61-1.36]	0.64313	0.91 [0.61-1.36]	0.64313	NA	NA	-0.39	0.6963	+-	-0.39	0.6963	+-	NA	NA	NA	-0.158	0.8746	+---+-+	-0.158	0.8746	+---+-+	NA	NA	NA
7	ABCB4	4	MISSLOF	TRUE	0.01	186 (1)	62 (0)	1.15 [0.82-1.63]	0.40834	1.15 [0.82-1.63]	0.41099	3482.5 [0-1.6005E+171]	0.7989	0.688	0.4917	++	0.681	0.496	++	0.306	0.7598	+?	1.07	0.2848	+-+++++	1.07	0.2848	+-+++++	NA	NA	NA
7	ABCB4	7	MISSLOF	FALSE	0.01	235 (2)	87 (0)	0.96 [0.71-1.3]	0.81027	0.96 [0.71-1.3]	0.79397	19039 [0-3.6936E+192]	0.60104	-0.167	0.8674	+-	-0.192	0.8476	+-	0.588	0.5568	+?	-0.018	0.9852	+---+-+	-0.027	0.9786	+---+-+	0.465	0.6417	+??????
7	ABCB5	3	LOF	-	0.0001	7 (0)	0 (0)	206850 [0-1.2688E+161]	0.05395	206850 [0-1.2688E+161]	0.05395	NA	NA	1.863	0.06245	++	1.863	0.06245	++	NA	NA	NA	1.166	0.2435	+?++?++	1.166	0.2435	+?++?++	NA	NA	NA
7	ABCB5	2	LOF	-	0.001	21 (0)	4 (0)	1.87 [0.57-6.09]	0.27637	1.87 [0.57-6.09]	0.27637	NA	NA	1.138	0.255	++	1.138	0.255	++	NA	NA	NA	0.842	0.3995	-+++?++	0.842	0.3995	-+++?++	NA	NA	NA
7	ABCB5	1	LOF	-	0.01	47 (0)	10 (0)	1.03 [0.47-2.27]	0.93631	1.03 [0.47-2.27]	0.93631	NA	NA	0.459	0.6464	++	0.459	0.6464	++	NA	NA	NA	0.491	0.6237	-++++++	0.491	0.6237	-++++++	NA	NA	NA
7	ABCB5	6	MISSLOF	TRUE	0.0001	78 (1)	25 (0)	1.09 [0.65-1.82]	0.74139	1.06 [0.63-1.78]	0.83573	103490 [0-4.7557E+172]	0.24276	0.218	0.8272	++	0.104	0.9174	++	1.103	0.2699	+?	1.649	0.09908	+++++-+	1.731	0.0835	+++++-+	1.091	0.2754	????+??
7	ABCB5	9	MISSLOF	FALSE	0.0001	88 (1)	28 (0)	1.1 [0.68-1.78]	0.70254	1.07 [0.65-1.75]	0.78927	103490 [0-4.7557E+172]	0.24276	0.387	0.6986	++	0.283	0.777	++	1.103	0.2699	+?	1.424	0.1545	+++++-+	1.353	0.1759	+++++-+	1.091	0.2754	????+??
7	ABCB5	5	MISSLOF	TRUE	0.001	181 (2)	54 (0)	1.25 [0.87-1.78]	0.21954	1.23 [0.86-1.76]	0.25314	110900 [0-1.9744E+172]	0.21914	1.226	0.2201	++	1.144	0.2527	++	1.19	0.2342	+?	1.518	0.129	--+++-+	1.513	0.1302	--+++-+	1.029	0.3034	??+?+??
7	ABCB5	8	MISSLOF	FALSE	0.001	213 (2)	61 (0)	1.24 [0.89-1.74]	0.19783	1.23 [0.88-1.73]	0.22727	110900 [0-1.9744E+172]	0.21914	1.355	0.1755	++	1.275	0.2022	++	1.19	0.2342	+?	1.097	0.2728	--+++-+	1.081	0.2795	--+++-+	1.029	0.3034	??+?+??
7	ABCB5	4	MISSLOF	TRUE	0.01	567 (13)	189 (3)	1.01 [0.82-1.25]	0.89469	1.01 [0.81-1.25]	0.93709	1.34 [0.29-6.13]	0.6979	0.074	0.9408	+-	0.041	0.9672	+-	0.262	0.7933	+?	-0.047	0.9627	+-+-+-+	-0.069	0.9452	--+-+-+	-0.015	0.9881	+-+-+??
7	ABCB5	7	MISSLOF	FALSE	0.01	588 (13)	194 (3)	1.02 [0.83-1.25]	0.8781	1.01 [0.82-1.25]	0.91958	1.34 [0.29-6.13]	0.6979	0.131	0.896	+-	0.097	0.9225	+-	0.262	0.7933	+?	-0.008	0.9933	+-+++-+	-0.069	0.9453	--+++-+	-0.015	0.9881	+-+-+??
2	ABCB6	3	LOF	-	0.0001	4 (0)	2 (0)	1.68 [0.23-12.14]	0.60742	1.68 [0.23-12.14]	0.60742	NA	NA	0.377	0.7058	+-	0.377	0.7058	+-	NA	NA	NA	-0.43	0.6674	+??-??+	-0.43	0.6674	+??-??+	NA	NA	NA
2	ABCB6	2	LOF	-	0.001	11 (0)	2 (0)	2.99 [0.56-15.96]	0.16757	2.99 [0.56-15.96]	0.16757	NA	NA	1.046	0.2956	+-	1.046	0.2956	+-	NA	NA	NA	1.572	0.1159	++?+??+	1.572	0.1159	++?+??+	NA	NA	NA
2	ABCB6	1	LOF	-	0.01	11 (0)	2 (0)	2.99 [0.56-15.96]	0.16757	2.99 [0.56-15.96]	0.16757	NA	NA	1.046	0.2956	+-	1.046	0.2956	+-	NA	NA	NA	1.572	0.1159	++?+??+	1.572	0.1159	++?+??+	NA	NA	NA
2	ABCB6	6	MISSLOF	TRUE	0.0001	60 (0)	27 (0)	1.23 [0.72-2.09]	0.44074	1.23 [0.72-2.09]	0.44074	NA	NA	0.572	0.5672	+-	0.572	0.5672	+-	NA	NA	NA	0.3	0.7642	++?-++-	0.3	0.7642	++?-++-	NA	NA	NA
2	ABCB6	9	MISSLOF	FALSE	0.0001	64 (0)	27 (0)	1.27 [0.75-2.15]	0.36771	1.27 [0.75-2.15]	0.36771	NA	NA	0.703	0.4818	+-	0.703	0.4818	+-	NA	NA	NA	0.401	0.6881	+++-++-	0.401	0.6881	+++-++-	NA	NA	NA
2	ABCB6	5	MISSLOF	TRUE	0.001	132 (0)	47 (0)	1.42 [0.95-2.1]	0.079266	1.42 [0.95-2.1]	0.079266	NA	NA	1.757	0.07894	+-	1.757	0.07894	+-	NA	NA	NA	1.308	0.1908	++?-+++	1.308	0.1908	++?-+++	NA	NA	NA
2	ABCB6	8	MISSLOF	FALSE	0.001	138 (0)	48 (0)	1.4 [0.95-2.07]	0.086588	1.4 [0.95-2.07]	0.086588	NA	NA	1.696	0.08998	+-	1.696	0.08998	+-	NA	NA	NA	1.196	0.2318	+++-+++	1.196	0.2318	+++-+++	NA	NA	NA
2	ABCB6	4	MISSLOF	TRUE	0.01	376 (2)	145 (2)	1.13 [0.89-1.43]	0.30341	1.15 [0.9-1.46]	0.26199	0.5 [0.06-3.88]	0.51122	0.639	0.523	+-	0.828	0.4076	+-	-0.282	0.7781	-+	0.315	0.7524	+-?-+++	0.374	0.7088	+-?-+++	-0.706	0.4803	?+?--??
2	ABCB6	7	MISSLOF	FALSE	0.01	382 (2)	146 (2)	1.13 [0.89-1.43]	0.31128	1.14 [0.9-1.45]	0.26945	0.5 [0.06-3.88]	0.51122	0.616	0.538	+-	0.804	0.4215	+-	-0.282	0.7781	-+	0.306	0.7598	+-+-+++	0.352	0.7248	+-+-+++	-0.706	0.4803	?+?--??
X	ABCB7	6	MISSLOF	TRUE	0.0001	4 (1)	3 (1)	0.6 [0.17-2.06]	0.43392	0.61 [0.09-4.03]	0.61626	0.22 [0.01-3.63]	0.30591	0.015	0.9877	+-	0.232	0.8164	+-	-0.491	0.6232	+-	-0.782	0.4344	???-++?	-0.725	0.4684	???-++?	-1.016	0.3094	???-+??
X	ABCB7	9	MISSLOF	FALSE	0.0001	12 (2)	9 (2)	0.67 [0.3-1.51]	0.34243	0.73 [0.25-2.15]	0.57448	0.22 [0.03-1.79]	0.168	-0.926	0.3545	--	-1.219	0.2229	--	-1.496	0.1347	--	-1.012	0.3115	?---++?	-0.715	0.4745	?---++?	-0.92	0.3578	?+?-+??
X	ABCB7	5	MISSLOF	TRUE	0.001	9 (3)	5 (1)	0.65 [0.24-1.74]	0.41154	0.59 [0.14-2.42]	0.46869	0.38 [0.04-4.19]	0.46508	-0.656	0.5117	+-	-0.653	0.514	--	-0.269	0.7879	+-	-1.69	0.09111	-??--+?	-1.501	0.1332	-??--+?	-0.847	0.3969	+??-+??
X	ABCB7	8	MISSLOF	FALSE	0.001	39 (10)	18 (4)	0.9 [0.53-1.55]	0.71383	1.02 [0.5-2.09]	0.96211	0.48 [0.13-1.78]	0.29474	-0.577	0.564	--	-0.847	0.3969	--	-0.463	0.6437	+-	-1.263	0.2065	+---+--	-1.267	0.2052	----+--	-0.728	0.4664	++?-++-
X	ABCB7	4	MISSLOF	TRUE	0.01	9 (3)	5 (1)	0.65 [0.24-1.74]	0.41154	0.59 [0.14-2.42]	0.46869	0.38 [0.04-4.19]	0.46508	-0.656	0.5117	+-	-0.653	0.514	--	-0.269	0.7879	+-	-1.69	0.09111	-??--+?	-1.501	0.1332	-??--+?	-0.847	0.3969	+??-+??
X	ABCB7	7	MISSLOF	FALSE	0.01	57 (16)	28 (6)	0.74 [0.48-1.14]	0.18477	0.75 [0.41-1.38]	0.36309	0.39 [0.14-1.12]	0.098706	-1.451	0.1469	--	-1.696	0.08994	--	0.112	0.9108	+-	-2.16	0.03074	+------	-1.985	0.04717	+------	-1.21	0.2264	++?--+-
7	ABCB8	3	LOF	-	0.0001	2 (0)	3 (0)	0.72 [0.08-6.9]	0.77433	0.72 [0.08-6.9]	0.77433	NA	NA	-0.708	0.479	-+	-0.708	0.479	-+	NA	NA	NA	-0.041	0.9669	???-???	-0.041	0.9669	???-???	NA	NA	NA
7	ABCB8	2	LOF	-	0.001	2 (0)	3 (0)	0.72 [0.08-6.9]	0.77433	0.72 [0.08-6.9]	0.77433	NA	NA	-0.708	0.479	-+	-0.708	0.479	-+	NA	NA	NA	-0.041	0.9669	???-???	-0.041	0.9669	???-???	NA	NA	NA
7	ABCB8	1	LOF	-	0.01	2 (0)	3 (0)	0.72 [0.08-6.9]	0.77433	0.72 [0.08-6.9]	0.77433	NA	NA	-0.708	0.479	-+	-0.708	0.479	-+	NA	NA	NA	-0.041	0.9669	???-???	-0.041	0.9669	???-???	NA	NA	NA
7	ABCB8	6	MISSLOF	TRUE	0.0001	51 (1)	18 (0)	1.36 [0.74-2.51]	0.30905	1.36 [0.73-2.51]	0.32619	21595 [0-9.9232E+171]	0.54172	1.124	0.2609	++	1.086	0.2773	++	0.584	0.559	+?	1.389	0.165	-++++++	1.381	0.1671	-++++++	0.487	0.6265	????+??
7	ABCB8	9	MISSLOF	FALSE	0.0001	62 (1)	23 (0)	1.24 [0.72-2.15]	0.43027	1.23 [0.71-2.14]	0.45165	21595 [0-9.9232E+171]	0.54172	0.91	0.363	++	0.877	0.3805	++	0.584	0.559	+?	1.064	0.2871	-++++++	1.051	0.2932	-++++++	0.487	0.6265	????+??
7	ABCB8	5	MISSLOF	TRUE	0.001	63 (1)	21 (0)	1.24 [0.71-2.18]	0.44681	1.23 [0.7-2.17]	0.46931	21595 [0-9.9232E+171]	0.54172	0.892	0.3722	++	0.853	0.3936	++	0.584	0.559	+?	1.511	0.1308	-+-++++	1.507	0.1319	-+-++++	0.487	0.6265	????+??
7	ABCB8	8	MISSLOF	FALSE	0.001	104 (2)	28 (0)	1.34 [0.83-2.14]	0.21948	1.32 [0.81-2.13]	0.2553	98231 [0-6.5978E+193]	0.26974	1.376	0.1689	++	1.304	0.1922	++	1.047	0.2953	+?	1.477	0.1397	-++++++	1.483	0.138	-++++++	0.845	0.3981	????+?+
7	ABCB8	4	MISSLOF	TRUE	0.01	99 (1)	32 (0)	1.49 [0.95-2.36]	0.077026	1.49 [0.94-2.36]	0.081002	21595 [0-9.9232E+171]	0.54172	1.78	0.07512	++	1.75	0.08013	++	0.584	0.559	+?	2.15	0.03153	-+-++++	2.144	0.03204	-+-++++	0.487	0.6265	????+??
7	ABCB8	7	MISSLOF	FALSE	0.01	298 (12)	73 (1)	1.31 [0.97-1.76]	0.076863	1.28 [0.94-1.74]	0.11775	7.32 [0.52-103.25]	0.083622	1.822	0.06845	++	1.62	0.1052	++	1.063	0.288	+-	1.934	0.05305	--+++++	1.921	0.05472	--+++++	0.583	0.5596	?+?-+++
12	ABCB9	3	LOF	-	0.0001	4 (0)	0 (0)	312340 [0-7.9526E+224]	0.097234	312340 [0-7.9526E+224]	0.097234	NA	NA	1.653	0.09838	+?	1.653	0.09838	+?	NA	NA	NA	1.588	0.1123	???+???	1.588	0.1123	???+???	NA	NA	NA
12	ABCB9	2	LOF	-	0.001	4 (0)	1 (0)	2.04 [0.21-19.63]	0.51405	2.04 [0.21-19.63]	0.51405	NA	NA	0.641	0.5218	+?	0.641	0.5218	+?	NA	NA	NA	0.393	0.6943	???+???	0.393	0.6943	???+???	NA	NA	NA
12	ABCB9	1	LOF	-	0.01	4 (0)	1 (0)	2.04 [0.21-19.63]	0.51405	2.04 [0.21-19.63]	0.51405	NA	NA	0.641	0.5218	+?	0.641	0.5218	+?	NA	NA	NA	0.393	0.6943	???+???	0.393	0.6943	???+???	NA	NA	NA
12	ABCB9	6	MISSLOF	TRUE	0.0001	73 (0)	15 (0)	2.03 [1.09-3.75]	0.017934	2.03 [1.09-3.75]	0.017934	NA	NA	2.47	0.01352	++	2.47	0.01352	++	NA	NA	NA	2.712	0.006683	+-+++++	2.712	0.006683	+-+++++	NA	NA	NA
12	ABCB9	9	MISSLOF	FALSE	0.0001	78 (0)	17 (0)	1.9 [1.06-3.41]	0.023755	1.9 [1.06-3.41]	0.023755	NA	NA	2.395	0.0166	++	2.395	0.0166	++	NA	NA	NA	2.691	0.007121	+-+++++	2.691	0.007121	+-+++++	NA	NA	NA
12	ABCB9	5	MISSLOF	TRUE	0.001	82 (0)	23 (0)	1.45 [0.86-2.45]	0.15823	1.45 [0.86-2.45]	0.15823	NA	NA	1.486	0.1372	++	1.486	0.1372	++	NA	NA	NA	1.691	0.09084	+-+++++	1.691	0.09084	+-+++++	NA	NA	NA
12	ABCB9	8	MISSLOF	FALSE	0.001	88 (0)	26 (0)	1.39 [0.84-2.29]	0.18949	1.39 [0.84-2.29]	0.18949	NA	NA	1.339	0.1807	++	1.339	0.1807	++	NA	NA	NA	1.552	0.1207	+-+++++	1.552	0.1207	+-+++++	NA	NA	NA
12	ABCB9	4	MISSLOF	TRUE	0.01	87 (1)	23 (0)	1.54 [0.92-2.59]	0.093185	1.54 [0.91-2.59]	0.096045	11700 [0-5.377E+171]	0.64672	1.719	0.08562	++	1.699	0.0894	++	0.514	0.607	+?	1.779	0.07528	+-+++++	1.774	0.07608	+-+++++	0.281	0.7791	??+????
12	ABCB9	7	MISSLOF	FALSE	0.01	159 (1)	53 (1)	1.38 [0.97-1.97]	0.071769	1.41 [0.98-2.03]	0.057552	0.34 [0.01-8.44]	0.51003	1.833	0.06677	++	1.942	0.05211	++	-0.635	0.5256	-?	2.194	0.02822	+-+++++	2.285	0.0223	+-+++++	-0.99	0.322	??+-???
16	ABCC1	6	MISSLOF	TRUE	0.0001	69 (0)	32 (0)	0.72 [0.44-1.17]	0.18996	0.72 [0.44-1.17]	0.18996	NA	NA	0.474	0.6352	+-	0.474	0.6352	+-	NA	NA	NA	-0.83	0.4065	++---++	-0.83	0.4065	++---++	NA	NA	NA
16	ABCC1	9	MISSLOF	FALSE	0.0001	76 (1)	33 (0)	0.77 [0.48-1.23]	0.27496	0.76 [0.48-1.23]	0.26971	3702 [0-1.7013E+171]	0.79286	0.264	0.792	+-	0.277	0.7816	+-	0.284	0.7768	+?	-0.715	0.4746	++---++	-0.715	0.4746	++---++	0.222	0.824	??????+
16	ABCC1	5	MISSLOF	TRUE	0.001	137 (1)	46 (0)	1.06 [0.72-1.55]	0.77669	1.05 [0.71-1.54]	0.8229	49982 [0-2.2971E+172]	0.37973	0.378	0.7056	++	0.314	0.7534	++	0.899	0.3686	+?	-0.222	0.8246	+++---+	-0.237	0.813	+++---+	0.874	0.382	??+????
16	ABCC1	8	MISSLOF	FALSE	0.001	147 (2)	48 (0)	1.11 [0.76-1.62]	0.57139	1.1 [0.75-1.61]	0.61346	54954 [0-2.2539E+174]	0.35921	0.653	0.5138	++	0.59	0.5551	++	0.943	0.3458	+?	-0.036	0.9713	+++---+	-0.054	0.9567	+++---+	0.702	0.483	??+???+
16	ABCC1	4	MISSLOF	TRUE	0.01	250 (1)	86 (1)	1.17 [0.88-1.56]	0.28169	1.18 [0.88-1.58]	0.26049	0.62 [0.04-10.29]	0.74051	1.39	0.1646	++	1.454	0.146	++	-0.357	0.721	-?	0.825	0.4095	+++-++-	0.879	0.3794	+++-++-	-0.627	0.5303	??+?-??
16	ABCC1	7	MISSLOF	FALSE	0.01	279 (3)	92 (2)	1.2 [0.91-1.58]	0.19723	1.22 [0.92-1.61]	0.16992	0.69 [0.09-5.06]	0.71813	1.334	0.1822	+-	1.459	0.1446	+-	-0.853	0.3936	+-	1.392	0.164	++++++-	1.491	0.136	++++++-	-0.119	0.9053	-++?-?+
6	ABCC10	3	LOF	-	0.0001	8 (0)	2 (0)	1.24 [0.22-7.03]	0.80374	1.24 [0.22-7.03]	0.80374	NA	NA	0.285	0.7759	-+	0.285	0.7759	-+	NA	NA	NA	0.329	0.7421	+??+?+-	0.329	0.7421	+??+?+-	NA	NA	NA
6	ABCC10	2	LOF	-	0.001	14 (0)	2 (0)	2.23 [0.45-10.99]	0.2902	2.23 [0.45-10.99]	0.2902	NA	NA	1.13	0.2583	++	1.13	0.2583	++	NA	NA	NA	1.205	0.2281	++?+?+-	1.205	0.2281	++?+?+-	NA	NA	NA
6	ABCC10	1	LOF	-	0.01	14 (0)	2 (0)	2.23 [0.45-10.99]	0.2902	2.23 [0.45-10.99]	0.2902	NA	NA	1.13	0.2583	++	1.13	0.2583	++	NA	NA	NA	1.205	0.2281	++?+?+-	1.205	0.2281	++?+?+-	NA	NA	NA
6	ABCC10	6	MISSLOF	TRUE	0.0001	82 (0)	34 (0)	0.92 [0.58-1.45]	0.71555	0.92 [0.58-1.45]	0.71555	NA	NA	-0.4	0.6893	+-	-0.4	0.6893	+-	NA	NA	NA	-0.315	0.7531	+-+-+--	-0.315	0.7531	+-+-+--	NA	NA	NA
6	ABCC10	9	MISSLOF	FALSE	0.0001	112 (0)	43 (0)	1 [0.67-1.51]	0.98537	1 [0.67-1.51]	0.98537	NA	NA	-0.049	0.9608	+-	-0.049	0.9608	+-	NA	NA	NA	-0.12	0.9042	+-+-+--	-0.12	0.9042	+-+-+--	NA	NA	NA
6	ABCC10	5	MISSLOF	TRUE	0.001	151 (1)	54 (0)	1.04 [0.72-1.49]	0.84125	1.03 [0.71-1.48]	0.8804	40541 [0-1.8628E+172]	0.42002	0.195	0.8457	++	0.197	0.8436	++	0.792	0.4282	+?	0.746	0.4557	+++++--	0.695	0.4869	+++++--	0.95	0.3423	???+???
6	ABCC10	8	MISSLOF	FALSE	0.001	223 (2)	75 (0)	1.07 [0.79-1.46]	0.65567	1.06 [0.78-1.45]	0.69104	52635 [0-5.5933E+182]	0.38229	0.442	0.6585	+-	0.397	0.6912	+-	0.862	0.3888	+?	1.254	0.2099	++++++-	1.207	0.2275	++++++-	0.947	0.3436	???+?+?
6	ABCC10	4	MISSLOF	TRUE	0.01	199 (1)	77 (0)	1 [0.73-1.37]	0.98949	1 [0.73-1.36]	0.97519	40541 [0-1.8628E+172]	0.42002	0.015	0.9879	+-	0.016	0.9869	+-	0.792	0.4282	+?	0.865	0.3869	+++++--	-0.303	0.7617	+++-+--	0.95	0.3423	???+???
6	ABCC10	7	MISSLOF	FALSE	0.01	338 (4)	120 (0)	1.08 [0.84-1.38]	0.56567	1.06 [0.83-1.37]	0.62572	164500 [0-4.9928E+216]	0.19481	0.553	0.5801	++	0.469	0.6391	++	1.293	0.1959	+?	1.428	0.1532	+++++--	1.363	0.1729	+++++--	1.246	0.2128	+??+?+?
16	ABCC11	3	LOF	-	0.0001	13 (1)	4 (0)	1.35 [0.41-4.47]	0.6117	1.28 [0.35-4.63]	0.70265	40541 [0-1.8628E+172]	0.42002	0.505	0.6138	++	0.32	0.749	-+	0.792	0.4282	+?	1.036	0.3001	?+?+++?	0.884	0.3768	?+?+++?	0.95	0.3423	???+???
16	ABCC11	2	LOF	-	0.001	18 (1)	6 (0)	0.99 [0.37-2.69]	0.98659	0.91 [0.31-2.66]	0.86398	40541 [0-1.8628E+172]	0.42002	0.064	0.9491	-+	-0.132	0.8948	-+	0.792	0.4282	+?	0.493	0.6221	+-?+++?	0.593	0.5533	+-?+++?	0.95	0.3423	???+???
16	ABCC11	1	LOF	-	0.01	29 (1)	10 (0)	1.4 [0.63-3.12]	0.39935	1.37 [0.6-3.13]	0.4443	40541 [0-1.8628E+172]	0.42002	0.835	0.4036	-+	0.71	0.4777	-+	0.792	0.4282	+?	1.125	0.2607	+-?+++?	1.025	0.3055	+-?+++?	0.95	0.3423	???+???
16	ABCC11	6	MISSLOF	TRUE	0.0001	74 (1)	29 (0)	0.98 [0.6-1.59]	0.92719	0.96 [0.58-1.58]	0.86996	40541 [0-1.8628E+172]	0.42002	-0.09	0.928	-+	-0.177	0.8598	-+	0.792	0.4282	+?	0.037	0.9704	-+++-+-	-0.012	0.9901	-+++-+-	0.95	0.3423	???+???
16	ABCC11	9	MISSLOF	FALSE	0.0001	113 (1)	42 (0)	0.91 [0.6-1.36]	0.63309	0.89 [0.59-1.35]	0.58764	40541 [0-1.8628E+172]	0.42002	-0.513	0.6076	-+	-0.589	0.556	-+	0.792	0.4282	+?	0.502	0.6158	-+++---	0.595	0.5517	-+++---	0.95	0.3423	???+???
16	ABCC11	5	MISSLOF	TRUE	0.001	139 (2)	57 (0)	0.99 [0.69-1.41]	0.93951	0.97 [0.67-1.4]	0.86853	89222 [0-2.0054E+199]	0.29685	0.546	0.585	++	-0.14	0.8884	-+	1.017	0.3089	+?	-0.229	0.8188	-++--+-	-0.282	0.7783	-++--+-	0.995	0.3198	???+??+
16	ABCC11	8	MISSLOF	FALSE	0.001	206 (2)	81 (0)	0.92 [0.68-1.24]	0.57268	0.9 [0.66-1.23]	0.51826	89222 [0-2.0054E+199]	0.29685	1.079	0.2807	++	-0.692	0.4892	-+	1.017	0.3089	+?	-0.473	0.6364	-++--+-	-0.564	0.5726	-++--+-	0.995	0.3198	???+??+
16	ABCC11	4	MISSLOF	TRUE	0.01	299 (6)	108 (0)	1.04 [0.8-1.36]	0.76489	1.01 [0.77-1.33]	0.92372	6.66 [0.22-205.67]	0.13627	1.163	0.2449	++	1.373	0.1698	++	1.43	0.1528	+?	-0.601	0.5479	---++--	-0.719	0.4722	---++--	1.743	0.08137	++?++?+
16	ABCC11	7	MISSLOF	FALSE	0.01	421 (6)	161 (1)	1.01 [0.81-1.26]	0.91841	0.99 [0.79-1.25]	0.95285	5.69 [0.46-70.27]	0.13384	1.611	0.1072	++	-0.011	0.9909	-+	1.389	0.1648	+?	-0.747	0.455	--++---	-0.826	0.409	--++---	0.733	0.4638	++?-+?+
16	ABCC12	3	LOF	-	0.0001	11 (0)	4 (0)	1.42 [0.37-5.37]	0.60474	1.42 [0.37-5.37]	0.60474	NA	NA	0.829	0.4071	++	0.829	0.4071	++	NA	NA	NA	0.515	0.6068	?+?-++?	0.515	0.6068	?+?-++?	NA	NA	NA
16	ABCC12	2	LOF	-	0.001	26 (0)	8 (0)	1.54 [0.63-3.78]	0.33107	1.54 [0.63-3.78]	0.33107	NA	NA	0.969	0.3325	++	0.969	0.3325	++	NA	NA	NA	1.068	0.2857	+-++++-	1.068	0.2857	+-++++-	NA	NA	NA
16	ABCC12	1	LOF	-	0.01	91 (0)	29 (0)	1.14 [0.69-1.87]	0.61139	1.14 [0.69-1.87]	0.61139	NA	NA	0.665	0.5062	+-	0.665	0.5062	+-	NA	NA	NA	0.2	0.8414	+-+-+-+	0.2	0.8414	+-+-+-+	NA	NA	NA
16	ABCC12	6	MISSLOF	TRUE	0.0001	71 (1)	18 (0)	1.42 [0.79-2.56]	0.23173	1.42 [0.79-2.56]	0.2341	3690.2 [0-1.6958E+171]	0.79317	1.107	0.2682	++	1.099	0.2719	++	0.291	0.771	+?	1.576	0.1151	++++-++	1.576	0.1151	++++-++	0.107	0.9146	?????+?
16	ABCC12	9	MISSLOF	FALSE	0.0001	122 (1)	32 (0)	1.53 [0.97-2.4]	0.0612	1.53 [0.97-2.4]	0.061786	3690.2 [0-1.6958E+171]	0.79317	1.802	0.07162	++	1.796	0.07242	++	0.291	0.771	+?	2.33	0.0198	++++-++	2.331	0.01973	++++-++	0.107	0.9146	?????+?
16	ABCC12	5	MISSLOF	TRUE	0.001	118 (2)	39 (0)	1.23 [0.81-1.87]	0.32036	1.22 [0.8-1.86]	0.3464	46576 [0-5.1356E+176]	0.39646	0.797	0.4254	++	0.741	0.4586	++	0.844	0.3986	+?	1.481	0.1385	+-++-+-	1.422	0.155	+-++-+-	0.927	0.3538	???+?+?
16	ABCC12	8	MISSLOF	FALSE	0.001	189 (2)	57 (0)	1.36 [0.96-1.92]	0.080696	1.35 [0.95-1.92]	0.087618	46576 [0-5.1356E+176]	0.39646	1.556	0.1198	++	1.518	0.129	++	0.844	0.3986	+?	1.997	0.04583	++++-+-	1.955	0.0506	++++-+-	0.927	0.3538	???+?+?
16	ABCC12	4	MISSLOF	TRUE	0.01	401 (11)	118 (1)	1.2 [0.93-1.55]	0.16823	1.19 [0.91-1.54]	0.20054	2.65 [0.29-24.52]	0.34319	0.991	0.3217	+-	0.887	0.3752	+-	1.036	0.3001	+-	1.076	0.2819	--+++++	1.046	0.2957	--+++++	0.361	0.7181	+??-++?
16	ABCC12	7	MISSLOF	FALSE	0.01	466 (11)	135 (1)	1.26 [0.99-1.6]	0.057603	1.25 [0.98-1.6]	0.069351	2.65 [0.29-24.52]	0.34319	1.46	0.1443	+-	1.374	0.1695	+-	1.036	0.3001	+-	1.44	0.1499	--++++-	1.42	0.1555	--++++-	0.361	0.7181	+??-++?
10	ABCC2	3	LOF	-	0.0001	11 (0)	4 (0)	1.8 [0.48-6.82]	0.3778	1.8 [0.48-6.82]	0.3778	NA	NA	0.384	0.7009	-+	0.384	0.7009	-+	NA	NA	NA	1.119	0.2632	+++++?-	1.119	0.2632	+++++?-	NA	NA	NA
10	ABCC2	2	LOF	-	0.001	16 (0)	4 (0)	2.82 [0.82-9.78]	0.084893	2.82 [0.82-9.78]	0.084893	NA	NA	1.609	0.1077	++	1.609	0.1077	++	NA	NA	NA	1.824	0.06819	+++++?-	1.824	0.06819	+++++?-	NA	NA	NA
10	ABCC2	1	LOF	-	0.01	16 (0)	4 (0)	2.82 [0.82-9.78]	0.084893	2.82 [0.82-9.78]	0.084893	NA	NA	1.609	0.1077	++	1.609	0.1077	++	NA	NA	NA	1.824	0.06819	+++++?-	1.824	0.06819	+++++?-	NA	NA	NA
10	ABCC2	6	MISSLOF	TRUE	0.0001	80 (0)	28 (0)	1.17 [0.71-1.92]	0.52991	1.17 [0.71-1.92]	0.52991	NA	NA	0.691	0.4896	++	0.691	0.4896	++	NA	NA	NA	0.439	0.6608	-++++--	0.439	0.6608	-++++--	NA	NA	NA
10	ABCC2	9	MISSLOF	FALSE	0.0001	111 (0)	35 (0)	1.41 [0.91-2.2]	0.11826	1.41 [0.91-2.2]	0.11826	NA	NA	1.538	0.1241	++	1.538	0.1241	++	NA	NA	NA	0.723	0.4696	-++++--	0.723	0.4696	-++++--	NA	NA	NA
10	ABCC2	5	MISSLOF	TRUE	0.001	131 (0)	45 (0)	1.19 [0.8-1.76]	0.38844	1.19 [0.8-1.76]	0.38844	NA	NA	0.94	0.3471	++	0.94	0.3471	++	NA	NA	NA	0.534	0.5934	-+++-+-	0.534	0.5934	-+++-+-	NA	NA	NA
10	ABCC2	8	MISSLOF	FALSE	0.001	198 (0)	67 (0)	1.21 [0.87-1.69]	0.24126	1.21 [0.87-1.69]	0.24126	NA	NA	1.239	0.2155	++	1.239	0.2155	++	NA	NA	NA	1.194	0.2323	+++++--	1.194	0.2323	+++++--	NA	NA	NA
10	ABCC2	4	MISSLOF	TRUE	0.01	398 (7)	147 (1)	1.06 [0.84-1.34]	0.60744	1.07 [0.85-1.35]	0.5791	0.65 [0.07-5.78]	0.71101	0.586	0.5579	++	0.617	0.5369	++	0.253	0.8006	+?	0.261	0.7938	+-++---	0.251	0.8016	+-++---	0.359	0.72	+????+?
10	ABCC2	7	MISSLOF	FALSE	0.01	540 (8)	202 (1)	1.01 [0.83-1.24]	0.89964	1.02 [0.83-1.25]	0.88086	0.75 [0.09-6.49]	0.79946	-0.115	0.9085	+-	-0.102	0.9184	+-	0.122	0.9029	+?	-0.228	0.82	+-+-++-	-0.295	0.7678	+-+-+--	0.359	0.72	+????+?
17	ABCC3	3	LOF	-	0.0001	11 (0)	1 (0)	6.36 [0.41-98.75]	0.12491	6.36 [0.41-98.75]	0.12491	NA	NA	1.504	0.1325	++	1.504	0.1325	++	NA	NA	NA	1.425	0.1542	+??++++	1.425	0.1542	+??++++	NA	NA	NA
17	ABCC3	2	LOF	-	0.001	15 (0)	2 (0)	3.51 [0.54-22.87]	0.14863	3.51 [0.54-22.87]	0.14863	NA	NA	1.468	0.1421	++	1.468	0.1421	++	NA	NA	NA	1.197	0.2314	++?++++	1.197	0.2314	++?++++	NA	NA	NA
17	ABCC3	1	LOF	-	0.01	15 (0)	2 (0)	3.51 [0.54-22.87]	0.14863	3.51 [0.54-22.87]	0.14863	NA	NA	1.468	0.1421	++	1.468	0.1421	++	NA	NA	NA	1.197	0.2314	++?++++	1.197	0.2314	++?++++	NA	NA	NA
17	ABCC3	6	MISSLOF	TRUE	0.0001	77 (0)	23 (0)	1.28 [0.74-2.22]	0.37015	1.28 [0.74-2.22]	0.37015	NA	NA	0.841	0.4004	+-	0.841	0.4004	+-	NA	NA	NA	0.806	0.4201	-++--++	0.806	0.4201	-++--++	NA	NA	NA
17	ABCC3	9	MISSLOF	FALSE	0.0001	83 (0)	24 (0)	1.31 [0.77-2.25]	0.31106	1.31 [0.77-2.25]	0.31106	NA	NA	0.974	0.3302	+-	0.974	0.3302	+-	NA	NA	NA	0.913	0.3612	-++--++	0.913	0.3612	-++--++	NA	NA	NA
17	ABCC3	5	MISSLOF	TRUE	0.001	156 (0)	48 (0)	1.17 [0.8-1.72]	0.4139	1.17 [0.8-1.72]	0.4139	NA	NA	0.476	0.634	+-	0.476	0.634	+-	NA	NA	NA	0.826	0.4087	+++--++	0.826	0.4087	+++--++	NA	NA	NA
17	ABCC3	8	MISSLOF	FALSE	0.001	163 (0)	49 (0)	1.19 [0.82-1.74]	0.36136	1.19 [0.82-1.74]	0.36136	NA	NA	0.574	0.5659	+-	0.574	0.5659	+-	NA	NA	NA	0.889	0.3737	+++--++	0.889	0.3737	+++--++	NA	NA	NA
17	ABCC3	4	MISSLOF	TRUE	0.01	362 (4)	140 (1)	1.03 [0.81-1.3]	0.82217	1.02 [0.8-1.3]	0.85202	1.56 [0.15-16.07]	0.70003	0.504	0.6143	++	-0.216	0.8293	+-	0.843	0.399	++	0.538	0.5905	++++-+-	0.437	0.6622	++++-+-	1.166	0.2435	+??+-??
17	ABCC3	7	MISSLOF	FALSE	0.01	394 (5)	145 (1)	1.03 [0.81-1.29]	0.82785	1.02 [0.81-1.29]	0.86502	1.68 [0.17-16.6]	0.64469	-0.278	0.781	+-	-0.208	0.8351	+-	0.753	0.4515	++	0.513	0.6076	++++-+-	0.407	0.684	++++-+-	1.161	0.2458	+??+-+?
13	ABCC4	3	LOF	-	0.0001	7 (0)	0 (0)	212480 [0-2.6932E+160]	0.050197	212480 [0-2.6932E+160]	0.050197	NA	NA	1.868	0.06181	++	1.868	0.06181	++	NA	NA	NA	1.795	0.07262	?+?+?+?	1.795	0.07262	?+?+?+?	NA	NA	NA
13	ABCC4	2	LOF	-	0.001	8 (0)	0 (0)	5.24 [0.22-124.59]	0.16284	5.24 [0.22-124.59]	0.16284	NA	NA	1.88	0.06006	++	1.88	0.06006	++	NA	NA	NA	1.822	0.0685	?+?+?+?	1.822	0.0685	?+?+?+?	NA	NA	NA
13	ABCC4	1	LOF	-	0.01	8 (0)	0 (0)	5.24 [0.22-124.59]	0.16284	5.24 [0.22-124.59]	0.16284	NA	NA	1.88	0.06006	++	1.88	0.06006	++	NA	NA	NA	1.822	0.0685	?+?+?+?	1.822	0.0685	?+?+?+?	NA	NA	NA
13	ABCC4	6	MISSLOF	TRUE	0.0001	61 (0)	18 (0)	1.22 [0.68-2.22]	0.50111	1.22 [0.68-2.22]	0.50111	NA	NA	0.57	0.5686	-+	0.57	0.5686	-+	NA	NA	NA	0.895	0.3709	-+-+-++	0.895	0.3709	-+-+-++	NA	NA	NA
13	ABCC4	9	MISSLOF	FALSE	0.0001	64 (0)	20 (0)	1.16 [0.65-2.06]	0.60875	1.16 [0.65-2.06]	0.60875	NA	NA	0.398	0.6903	-+	0.398	0.6903	-+	NA	NA	NA	1.024	0.3059	-+-+-++	1.024	0.3059	-+-+-++	NA	NA	NA
13	ABCC4	5	MISSLOF	TRUE	0.001	79 (0)	28 (0)	0.94 [0.57-1.54]	0.79428	0.94 [0.57-1.54]	0.79428	NA	NA	-0.337	0.7362	-+	-0.337	0.7362	-+	NA	NA	NA	0.457	0.6475	-+-+-+-	0.457	0.6475	-+-+-+-	NA	NA	NA
13	ABCC4	8	MISSLOF	FALSE	0.001	95 (0)	32 (0)	1 [0.63-1.6]	0.99734	1 [0.63-1.6]	0.99734	NA	NA	-0.089	0.9293	-+	-0.089	0.9293	-+	NA	NA	NA	0.869	0.385	-+-+-+-	0.869	0.385	-+-+-+-	NA	NA	NA
13	ABCC4	4	MISSLOF	TRUE	0.01	183 (2)	73 (0)	0.88 [0.64-1.21]	0.43892	0.87 [0.63-1.21]	0.41916	25888 [0-5.4707E+191]	0.54351	-0.741	0.4584	-+	-0.776	0.4376	-+	0.605	0.5451	+?	-0.761	0.4465	-+---+-	-0.803	0.4222	-+---+-	0.678	0.4978	????+?+
13	ABCC4	7	MISSLOF	FALSE	0.01	216 (2)	85 (1)	0.87 [0.65-1.18]	0.36985	0.88 [0.65-1.19]	0.39689	0.42 [0.03-6.59]	0.54839	-0.885	0.376	-+	-0.845	0.398	-+	-0.622	0.5339	-?	0.12	0.9046	-+-+-+-	0.129	0.8975	-+-+-+-	0.07	0.9442	-???+?+
3	ABCC5	6	MISSLOF	TRUE	0.0001	30 (0)	17 (0)	0.79 [0.38-1.63]	0.52381	0.79 [0.38-1.63]	0.52381	NA	NA	-0.561	0.5747	--	-0.561	0.5747	--	NA	NA	NA	0.366	0.7147	++--+-+	0.366	0.7147	++--+-+	NA	NA	NA
3	ABCC5	9	MISSLOF	FALSE	0.0001	33 (0)	18 (0)	0.81 [0.41-1.61]	0.55352	0.81 [0.41-1.61]	0.55352	NA	NA	-1.116	0.2645	--	-1.116	0.2645	--	NA	NA	NA	0.38	0.7037	++--+-+	0.38	0.7037	++--+-+	NA	NA	NA
3	ABCC5	5	MISSLOF	TRUE	0.001	45 (0)	20 (1)	0.99 [0.54-1.84]	0.98323	1.04 [0.55-1.97]	0.9076	0 [0-5.8689E+162]	0.2933	-0.119	0.9056	+-	0.003	0.9975	+-	-1.083	0.2787	-?	0.24	0.8101	++--+--	0.315	0.753	++--+--	-1.344	0.179	??-????
3	ABCC5	8	MISSLOF	FALSE	0.001	53 (0)	21 (1)	1.08 [0.6-1.92]	0.80639	1.12 [0.61-2.06]	0.70201	0 [0-5.8689E+162]	0.2933	0.534	0.5934	++	0.527	0.5982	++	-1.083	0.2787	-?	0.397	0.6912	++--+--	0.472	0.6372	++--+--	-1.344	0.179	??-????
3	ABCC5	4	MISSLOF	TRUE	0.01	77 (0)	27 (1)	1.17 [0.71-1.93]	0.53367	1.21 [0.73-2.03]	0.45518	0 [0-5.8689E+162]	0.2933	0.573	0.5664	+-	0.718	0.4731	+-	-1.083	0.2787	-?	0.98	0.3269	+--++-+	1.055	0.2916	+--++-+	-1.344	0.179	??-????
3	ABCC5	7	MISSLOF	FALSE	0.01	85 (0)	28 (1)	1.22 [0.75-1.98]	0.41477	1.26 [0.77-2.08]	0.34766	0 [0-5.8689E+162]	0.2933	0.922	0.3567	++	1.058	0.2899	++	-1.083	0.2787	-?	1.098	0.2724	+--++-+	1.172	0.2412	+--++-+	-1.344	0.179	??-????
16	ABCC6	3	LOF	-	0.0001	13 (0)	4 (0)	1.15 [0.32-4.12]	0.82741	1.15 [0.32-4.12]	0.82741	NA	NA	0.597	0.5506	+-	0.597	0.5506	+-	NA	NA	NA	0.445	0.6564	++?++-?	0.445	0.6564	++?++-?	NA	NA	NA
16	ABCC6	2	LOF	-	0.001	16 (0)	4 (0)	1.62 [0.49-5.38]	0.41985	1.62 [0.49-5.38]	0.41985	NA	NA	1.194	0.2325	+-	1.194	0.2325	+-	NA	NA	NA	0.722	0.4703	++?++-+	0.722	0.4703	++?++-+	NA	NA	NA
16	ABCC6	1	LOF	-	0.01	26 (0)	5 (0)	2.71 [0.98-7.46]	0.036234	2.71 [0.98-7.46]	0.036234	NA	NA	2.461	0.01384	++	2.461	0.01384	++	NA	NA	NA	1.934	0.05312	++?++-+	1.934	0.05312	++?++-+	NA	NA	NA
16	ABCC6	6	MISSLOF	TRUE	0.0001	101 (0)	46 (0)	0.89 [0.59-1.35]	0.5909	0.89 [0.59-1.35]	0.5909	NA	NA	-0.744	0.457	-+	-0.744	0.457	-+	NA	NA	NA	-0.876	0.3813	---+---	-0.876	0.3813	---+---	NA	NA	NA
16	ABCC6	9	MISSLOF	FALSE	0.0001	123 (0)	56 (0)	0.85 [0.59-1.24]	0.40319	0.85 [0.59-1.24]	0.40319	NA	NA	-0.971	0.3317	-+	-0.971	0.3317	-+	NA	NA	NA	-0.578	0.5629	--++-+-	-0.578	0.5629	--++-+-	NA	NA	NA
16	ABCC6	5	MISSLOF	TRUE	0.001	207 (1)	77 (0)	1.02 [0.75-1.4]	0.89275	1.02 [0.74-1.4]	0.90992	17032 [0-7.8271E+171]	0.58467	-0.141	0.8878	+-	-0.167	0.8677	+-	0.599	0.5494	+?	0.068	0.9455	--++-+-	0.062	0.9505	--++-+-	0.613	0.5397	+??????
16	ABCC6	8	MISSLOF	FALSE	0.001	237 (1)	94 (0)	0.91 [0.68-1.22]	0.53562	0.91 [0.68-1.21]	0.52074	17032 [0-7.8271E+171]	0.58467	-0.386	0.6996	+-	-0.36	0.7185	+-	0.599	0.5494	+?	-1.32	0.1867	--+--+-	-1.333	0.1824	--+--+-	0.613	0.5397	+??????
16	ABCC6	4	MISSLOF	TRUE	0.01	447 (10)	145 (0)	1.09 [0.86-1.38]	0.46745	1.07 [0.84-1.35]	0.57504	9.87 [0.22-446.01]	0.11169	0.788	0.4305	+-	0.617	0.5369	+-	1.956	0.05045	++	0.898	0.3691	--+++++	0.808	0.4189	--+++++	2.166	0.03032	++?+?+?
16	ABCC6	7	MISSLOF	FALSE	0.01	497 (10)	169 (0)	1 [0.8-1.25]	0.98914	0.98 [0.79-1.23]	0.87781	9.87 [0.22-446.01]	0.11169	0.136	0.8918	+-	-0.036	0.9714	+-	1.956	0.05045	++	-0.175	0.8612	--+-++-	-0.352	0.7246	--+-++-	2.166	0.03032	++?+?+?
11	ABCC8	3	LOF	-	0.0001	3 (0)	4 (0)	0.45 [0.08-2.43]	0.3536	0.45 [0.08-2.43]	0.3536	NA	NA	-0.54	0.5894	--	-0.54	0.5894	--	NA	NA	NA	-1.383	0.1666	?---?+?	-1.383	0.1666	?---?+?	NA	NA	NA
11	ABCC8	2	LOF	-	0.001	3 (0)	4 (0)	0.45 [0.08-2.43]	0.3536	0.45 [0.08-2.43]	0.3536	NA	NA	-0.54	0.5894	--	-0.54	0.5894	--	NA	NA	NA	-1.383	0.1666	?---?+?	-1.383	0.1666	?---?+?	NA	NA	NA
11	ABCC8	1	LOF	-	0.01	3 (0)	4 (0)	0.45 [0.08-2.43]	0.3536	0.45 [0.08-2.43]	0.3536	NA	NA	-0.54	0.5894	--	-0.54	0.5894	--	NA	NA	NA	-1.383	0.1666	?---?+?	-1.383	0.1666	?---?+?	NA	NA	NA
11	ABCC8	6	MISSLOF	TRUE	0.0001	72 (0)	39 (0)	0.68 [0.43-1.07]	0.099133	0.68 [0.43-1.07]	0.099133	NA	NA	-1.728	0.08401	--	-1.728	0.08401	--	NA	NA	NA	-1.417	0.1564	+----+-	-1.417	0.1564	+----+-	NA	NA	NA
11	ABCC8	9	MISSLOF	FALSE	0.0001	76 (0)	39 (0)	0.76 [0.48-1.19]	0.23731	0.76 [0.48-1.19]	0.23731	NA	NA	-1.004	0.3155	-+	-1.004	0.3155	-+	NA	NA	NA	-1.032	0.3019	+----+-	-1.032	0.3019	+----+-	NA	NA	NA
11	ABCC8	5	MISSLOF	TRUE	0.001	113 (0)	50 (0)	0.8 [0.54-1.19]	0.26938	0.8 [0.54-1.19]	0.26938	NA	NA	-1.07	0.2847	-+	-1.07	0.2847	-+	NA	NA	NA	-0.535	0.5923	+--+-+-	-0.535	0.5923	+--+-+-	NA	NA	NA
11	ABCC8	8	MISSLOF	FALSE	0.001	119 (0)	51 (0)	0.84 [0.57-1.24]	0.37416	0.84 [0.57-1.24]	0.37416	NA	NA	-0.844	0.3985	-+	-0.844	0.3985	-+	NA	NA	NA	-0.424	0.6719	+--+-+-	-0.424	0.6719	+--+-+-	NA	NA	NA
11	ABCC8	4	MISSLOF	TRUE	0.01	113 (0)	50 (0)	0.8 [0.54-1.19]	0.26938	0.8 [0.54-1.19]	0.26938	NA	NA	-1.07	0.2847	-+	-1.07	0.2847	-+	NA	NA	NA	-0.535	0.5923	+--+-+-	-0.535	0.5923	+--+-+-	NA	NA	NA
11	ABCC8	7	MISSLOF	FALSE	0.01	119 (0)	51 (0)	0.84 [0.57-1.24]	0.37416	0.84 [0.57-1.24]	0.37416	NA	NA	-0.844	0.3985	-+	-0.844	0.3985	-+	NA	NA	NA	-0.424	0.6719	+--+-+-	-0.424	0.6719	+--+-+-	NA	NA	NA
12	ABCC9	3	LOF	-	0.0001	1 (0)	2 (0)	0.13 [0.01-1.69]	0.10905	0.13 [0.01-1.69]	0.10905	NA	NA	-1.68	0.09295	-?	-1.68	0.09295	-?	NA	NA	NA	-0.534	0.5934	???+-??	-0.534	0.5934	???+-??	NA	NA	NA
12	ABCC9	2	LOF	-	0.001	7 (0)	5 (0)	0.6 [0.17-2.13]	0.43256	0.6 [0.17-2.13]	0.43256	NA	NA	-0.921	0.3572	-+	-0.921	0.3572	-+	NA	NA	NA	0.198	0.8433	???+-??	0.198	0.8433	???+-??	NA	NA	NA
12	ABCC9	1	LOF	-	0.01	7 (0)	5 (0)	0.6 [0.17-2.13]	0.43256	0.6 [0.17-2.13]	0.43256	NA	NA	-0.921	0.3572	-+	-0.921	0.3572	-+	NA	NA	NA	0.198	0.8433	???+-??	0.198	0.8433	???+-??	NA	NA	NA
12	ABCC9	6	MISSLOF	TRUE	0.0001	25 (0)	17 (0)	0.69 [0.33-1.44]	0.33181	0.69 [0.33-1.44]	0.33181	NA	NA	-0.882	0.3778	+-	-0.882	0.3778	+-	NA	NA	NA	-0.629	0.5293	?++--+?	-0.629	0.5293	?++--+?	NA	NA	NA
12	ABCC9	9	MISSLOF	FALSE	0.0001	33 (0)	23 (0)	0.61 [0.32-1.15]	0.12884	0.61 [0.32-1.15]	0.12884	NA	NA	-1.58	0.1141	--	-1.58	0.1141	--	NA	NA	NA	-1.549	0.1213	-++--+-	-1.549	0.1213	-++--+-	NA	NA	NA
12	ABCC9	5	MISSLOF	TRUE	0.001	44 (0)	23 (0)	0.82 [0.46-1.47]	0.51358	0.82 [0.46-1.47]	0.51358	NA	NA	-0.44	0.66	+-	-0.44	0.66	+-	NA	NA	NA	-0.43	0.667	?++---+	-0.43	0.667	?++---+	NA	NA	NA
12	ABCC9	8	MISSLOF	FALSE	0.001	55 (0)	30 (0)	0.79 [0.47-1.33]	0.3716	0.79 [0.47-1.33]	0.3716	NA	NA	-1.046	0.2954	--	-1.046	0.2954	--	NA	NA	NA	-1.017	0.309	-++----	-1.017	0.309	-++----	NA	NA	NA
12	ABCC9	4	MISSLOF	TRUE	0.01	87 (0)	51 (0)	0.95 [0.64-1.41]	0.78603	0.95 [0.64-1.41]	0.78603	NA	NA	-0.685	0.4935	--	-0.685	0.4935	--	NA	NA	NA	0.245	0.8066	?++---+	0.245	0.8066	?++---+	NA	NA	NA
12	ABCC9	7	MISSLOF	FALSE	0.01	128 (0)	66 (1)	0.88 [0.62-1.24]	0.46297	0.9 [0.63-1.28]	0.562	0.05 [0-4.21]	0.03979	-1.015	0.3102	--	-0.858	0.3908	--	-2.117	0.03424	-?	-0.324	0.7459	--+--+-	-0.349	0.7271	--+--+-	-1.5	0.1336	?-?????
X	ABCD1	6	MISSLOF	TRUE	0.0001	20 (5)	10 (2)	0.98 [0.45-2.12]	0.95645	1.19 [0.43-3.27]	0.73813	0.46 [0.08-2.85]	0.42483	-0.743	0.4575	--	0.336	0.7372	+-	-0.625	0.5323	-+	0.526	0.5991	+-?+-+-	0.427	0.669	+-?+-+-	0.252	0.8007	+??+-?-
X	ABCD1	9	MISSLOF	FALSE	0.0001	23 (6)	10 (2)	1.02 [0.47-2.18]	0.96617	1.24 [0.46-3.37]	0.66532	0.49 [0.08-2.93]	0.45671	-0.078	0.938	+-	0.408	0.683	+-	-0.576	0.5649	-+	0.603	0.5467	+-?+-+-	0.54	0.589	+-?+-+-	0.308	0.7582	+??+-?-
X	ABCD1	5	MISSLOF	TRUE	0.001	30 (9)	13 (3)	0.98 [0.53-1.81]	0.94343	1.12 [0.47-2.69]	0.79399	0.63 [0.15-2.58]	0.53455	-0.136	0.8916	+-	0.198	0.8427	+-	0.711	0.4769	++	0.386	0.6997	+-?+-+-	0.39	0.6962	+-?+-+-	-0.082	0.9344	+??+-?-
X	ABCD1	8	MISSLOF	FALSE	0.001	36 (11)	13 (3)	1.05 [0.57-1.91]	0.88526	1.21 [0.52-2.85]	0.65296	0.74 [0.19-2.91]	0.67496	0.025	0.9797	+-	0.336	0.7366	+-	0.56	0.5754	++	0.489	0.6249	+-?+++-	0.474	0.6355	+-?+++-	0.012	0.9908	+??+-+-
X	ABCD1	4	MISSLOF	TRUE	0.01	38 (12)	14 (3)	1.14 [0.63-2.06]	0.65945	1.36 [0.6-3.07]	0.45964	0.86 [0.22-3.34]	0.82555	0.219	0.8266	+-	0.495	0.6206	+-	0.709	0.4785	++	0.758	0.4484	+-?+-+-	0.642	0.5211	+-?+-+-	0.522	0.6013	++?+-?-
X	ABCD1	7	MISSLOF	FALSE	0.01	51 (17)	21 (4)	1.1 [0.68-1.8]	0.68726	1.2 [0.61-2.38]	0.59377	1.04 [0.32-3.32]	0.95019	0.01	0.9917	+-	0.144	0.8854	+-	0.89	0.3734	++	0.573	0.5663	+-?+++-	-0.125	0.9002	+-?-++-	0.548	0.5835	++?+-+-
12	ABCD2	6	MISSLOF	TRUE	0.0001	16 (0)	7 (0)	0.88 [0.32-2.47]	0.81456	0.88 [0.32-2.47]	0.81456	NA	NA	-0.127	0.8991	+-	-0.127	0.8991	+-	NA	NA	NA	0.267	0.7895	+++-?++	0.267	0.7895	+++-?++	NA	NA	NA
12	ABCD2	9	MISSLOF	FALSE	0.0001	19 (0)	9 (0)	0.78 [0.31-1.97]	0.60161	0.78 [0.31-1.97]	0.60161	NA	NA	-0.257	0.7972	+-	-0.257	0.7972	+-	NA	NA	NA	-0.13	0.8962	+-+-+++	-0.13	0.8962	+-+-+++	NA	NA	NA
12	ABCD2	5	MISSLOF	TRUE	0.001	24 (0)	9 (0)	1.03 [0.43-2.45]	0.95518	1.03 [0.43-2.45]	0.95518	NA	NA	0.071	0.9432	+-	0.071	0.9432	+-	NA	NA	NA	0.485	0.6277	+++-+++	0.485	0.6277	+++-+++	NA	NA	NA
12	ABCD2	8	MISSLOF	FALSE	0.001	28 (0)	11 (0)	1.01 [0.45-2.24]	0.98731	1.01 [0.45-2.24]	0.98731	NA	NA	0.135	0.8924	+-	0.135	0.8924	+-	NA	NA	NA	-0.022	0.9823	+-+-+++	-0.022	0.9823	+-+-+++	NA	NA	NA
12	ABCD2	4	MISSLOF	TRUE	0.01	24 (0)	9 (0)	1.03 [0.43-2.45]	0.95518	1.03 [0.43-2.45]	0.95518	NA	NA	0.071	0.9432	+-	0.071	0.9432	+-	NA	NA	NA	0.485	0.6277	+++-+++	0.485	0.6277	+++-+++	NA	NA	NA
12	ABCD2	7	MISSLOF	FALSE	0.01	50 (0)	14 (0)	1.2 [0.6-2.37]	0.60578	1.2 [0.6-2.37]	0.60578	NA	NA	0.502	0.6157	+-	0.502	0.6157	+-	NA	NA	NA	0.493	0.6223	+++-+++	0.493	0.6223	+++-+++	NA	NA	NA
1	ABCD3	6	MISSLOF	TRUE	0.0001	17 (0)	4 (0)	1.06 [0.32-3.53]	0.92175	1.06 [0.32-3.53]	0.92175	NA	NA	0.583	0.5596	++	0.583	0.5596	++	NA	NA	NA	0.782	0.4344	++?+-?+	0.782	0.4344	++?+-?+	NA	NA	NA
1	ABCD3	9	MISSLOF	FALSE	0.0001	24 (0)	7 (0)	0.93 [0.35-2.43]	0.87854	0.93 [0.35-2.43]	0.87854	NA	NA	0.562	0.5743	++	0.562	0.5743	++	NA	NA	NA	0.937	0.3489	++?+-?+	0.937	0.3489	++?+-?+	NA	NA	NA
1	ABCD3	5	MISSLOF	TRUE	0.001	25 (0)	5 (0)	1.27 [0.45-3.58]	0.64808	1.27 [0.45-3.58]	0.64808	NA	NA	0.63	0.5286	++	0.63	0.5286	++	NA	NA	NA	0.988	0.323	++?+--+	0.988	0.323	++?+--+	NA	NA	NA
1	ABCD3	8	MISSLOF	FALSE	0.001	32 (0)	8 (0)	1.09 [0.45-2.6]	0.8516	1.09 [0.45-2.6]	0.8516	NA	NA	0.597	0.5508	++	0.597	0.5508	++	NA	NA	NA	0.72	0.4713	++?+--+	0.72	0.4713	++?+--+	NA	NA	NA
1	ABCD3	4	MISSLOF	TRUE	0.01	25 (0)	5 (0)	1.27 [0.45-3.58]	0.64808	1.27 [0.45-3.58]	0.64808	NA	NA	0.63	0.5286	++	0.63	0.5286	++	NA	NA	NA	0.988	0.323	++?+--+	0.988	0.323	++?+--+	NA	NA	NA
1	ABCD3	7	MISSLOF	FALSE	0.01	37 (0)	17 (0)	0.79 [0.4-1.53]	0.48415	0.79 [0.4-1.53]	0.48415	NA	NA	-0.72	0.4713	--	-0.72	0.4713	--	NA	NA	NA	-0.195	0.8451	++?---+	-0.195	0.8451	++?---+	NA	NA	NA
14	ABCD4	6	MISSLOF	TRUE	0.0001	10 (0)	0 (0)	378900 [0-5.04E+216]	0.060193	378900 [0-5.04E+216]	0.060193	NA	NA	1.777	0.07551	++	1.777	0.07551	++	NA	NA	NA	1.861	0.06281	+++++++	1.861	0.06281	+++++++	NA	NA	NA
14	ABCD4	9	MISSLOF	FALSE	0.0001	49 (1)	14 (0)	1.34 [0.66-2.7]	0.40711	1.34 [0.66-2.7]	0.40824	920.22 [0-4.2303E+170]	0.89521	0.608	0.5429	++	0.607	0.544	++	0.103	0.9181	+?	0.421	0.6739	-++++--	0.424	0.6716	-++++--	0.143	0.8864	?+?????
14	ABCD4	5	MISSLOF	TRUE	0.001	10 (0)	0 (0)	378900 [0-5.04E+216]	0.060193	378900 [0-5.04E+216]	0.060193	NA	NA	1.777	0.07551	++	1.777	0.07551	++	NA	NA	NA	1.861	0.06281	+++++++	1.861	0.06281	+++++++	NA	NA	NA
14	ABCD4	8	MISSLOF	FALSE	0.001	70 (1)	21 (0)	1.44 [0.82-2.53]	0.19848	1.44 [0.82-2.53]	0.19899	920.22 [0-4.2303E+170]	0.89521	1.104	0.2695	++	1.103	0.2699	++	0.103	0.9181	+?	0.529	0.597	-+-++--	0.526	0.5987	-+-++--	0.143	0.8864	?+?????
14	ABCD4	4	MISSLOF	TRUE	0.01	28 (1)	11 (0)	1 [0.44-2.28]	0.99424	0.99 [0.43-2.28]	0.98964	5309.9 [0-2.44E+171]	0.754	-0.398	0.6909	+-	-0.413	0.6799	+-	0.307	0.7587	+?	0.135	0.8924	+++--++	0.135	0.8924	+++--++	0.515	0.6066	?+?????
14	ABCD4	7	MISSLOF	FALSE	0.01	136 (3)	42 (0)	1.21 [0.81-1.81]	0.34251	1.2 [0.8-1.8]	0.37284	85968 [0-4.0199E+224]	0.36814	0.888	0.3745	++	0.831	0.406	++	0.862	0.3887	+?	0.326	0.7441	++--+-+	0.323	0.7468	++--+-+	0.91	0.3629	++?????
4	ABCE1	9	MISSLOF	FALSE	0.0001	10 (0)	5 (0)	0.87 [0.25-2.96]	0.81971	0.87 [0.25-2.96]	0.81971	NA	NA	-0.497	0.6194	-+	-0.497	0.6194	-+	NA	NA	NA	0.391	0.6958	?-?+++?	0.391	0.6958	?-?+++?	NA	NA	NA
4	ABCE1	8	MISSLOF	FALSE	0.001	11 (0)	5 (0)	0.88 [0.26-2.99]	0.83807	0.88 [0.26-2.99]	0.83807	NA	NA	-0.478	0.6323	-+	-0.478	0.6323	-+	NA	NA	NA	0.418	0.6762	?-?+++?	0.418	0.6762	?-?+++?	NA	NA	NA
4	ABCE1	7	MISSLOF	FALSE	0.01	11 (0)	5 (0)	0.88 [0.26-2.99]	0.83807	0.88 [0.26-2.99]	0.83807	NA	NA	-0.478	0.6323	-+	-0.478	0.6323	-+	NA	NA	NA	0.418	0.6762	?-?+++?	0.418	0.6762	?-?+++?	NA	NA	NA
6	ABCF1	6	MISSLOF	TRUE	0.0001	27 (0)	10 (0)	0.71 [0.31-1.64]	0.43432	0.71 [0.31-1.64]	0.43432	NA	NA	-0.753	0.4513	-+	-0.753	0.4513	-+	NA	NA	NA	0.031	0.9754	++?-+++	0.031	0.9754	++?-+++	NA	NA	NA
6	ABCF1	9	MISSLOF	FALSE	0.0001	29 (0)	12 (0)	0.68 [0.31-1.53]	0.36318	0.68 [0.31-1.53]	0.36318	NA	NA	-0.889	0.3738	-+	-0.889	0.3738	-+	NA	NA	NA	-0.036	0.9712	++?-+++	-0.036	0.9712	++?-+++	NA	NA	NA
6	ABCF1	5	MISSLOF	TRUE	0.001	30 (0)	12 (0)	0.72 [0.33-1.55]	0.40217	0.72 [0.33-1.55]	0.40217	NA	NA	-0.849	0.3958	-+	-0.849	0.3958	-+	NA	NA	NA	-0.27	0.7875	--+-+++	-0.27	0.7875	--+-+++	NA	NA	NA
6	ABCF1	8	MISSLOF	FALSE	0.001	35 (0)	14 (0)	0.71 [0.34-1.49]	0.37279	0.71 [0.34-1.49]	0.37279	NA	NA	-0.886	0.3758	-+	-0.886	0.3758	-+	NA	NA	NA	-0.063	0.9501	+-+-+++	-0.063	0.9501	+-+-+++	NA	NA	NA
6	ABCF1	4	MISSLOF	TRUE	0.01	61 (0)	21 (0)	0.73 [0.4-1.31]	0.29549	0.73 [0.4-1.31]	0.29549	NA	NA	0.912	0.3619	++	0.912	0.3619	++	NA	NA	NA	-0.74	0.4595	--+--++	-0.74	0.4595	--+--++	NA	NA	NA
6	ABCF1	7	MISSLOF	FALSE	0.01	181 (4)	68 (0)	0.93 [0.67-1.29]	0.67542	0.91 [0.65-1.27]	0.57241	191730 [0-1.2746E+221]	0.17443	-0.269	0.7882	+-	-0.419	0.6752	+-	1.363	0.1729	++	-0.668	0.5044	+-+--++	-0.796	0.4259	--+--++	0.852	0.3941	+?++?+?
7	ABCF2	6	MISSLOF	TRUE	0.0001	6 (0)	1 (0)	2.54 [0.27-23.91]	0.37691	2.54 [0.27-23.91]	0.37691	NA	NA	1.034	0.3012	+-	1.034	0.3012	+-	NA	NA	NA	0.381	0.7033	+?+-+??	0.381	0.7033	+?+-+??	NA	NA	NA
7	ABCF2	9	MISSLOF	FALSE	0.0001	21 (0)	3 (0)	2.46 [0.66-9.13]	0.14411	2.46 [0.66-9.13]	0.14411	NA	NA	1.506	0.1321	++	1.506	0.1321	++	NA	NA	NA	1.896	0.058	-+++++?	1.896	0.058	-+++++?	NA	NA	NA
7	ABCF2	5	MISSLOF	TRUE	0.001	6 (0)	1 (0)	2.54 [0.27-23.91]	0.37691	2.54 [0.27-23.91]	0.37691	NA	NA	1.034	0.3012	+-	1.034	0.3012	+-	NA	NA	NA	0.381	0.7033	+?+-+??	0.381	0.7033	+?+-+??	NA	NA	NA
7	ABCF2	8	MISSLOF	FALSE	0.001	21 (0)	3 (0)	2.46 [0.66-9.13]	0.14411	2.46 [0.66-9.13]	0.14411	NA	NA	1.506	0.1321	++	1.506	0.1321	++	NA	NA	NA	1.896	0.058	-+++++?	1.896	0.058	-+++++?	NA	NA	NA
7	ABCF2	4	MISSLOF	TRUE	0.01	73 (3)	25 (1)	0.78 [0.47-1.3]	0.3494	0.74 [0.43-1.28]	0.29474	1.16 [0.12-11.6]	0.89593	0.138	0.89	+-	0.238	0.812	+-	0.189	0.8503	+?	-0.355	0.7229	+-+--++	-0.287	0.7739	+-+--++	0.984	0.325	?+?????
7	ABCF2	7	MISSLOF	FALSE	0.01	108 (3)	37 (1)	0.83 [0.54-1.29]	0.40942	0.81 [0.51-1.28]	0.36882	1.16 [0.12-11.6]	0.89593	1.104	0.2696	++	1.2	0.2301	++	0.189	0.8503	+?	-0.129	0.897	--++--+	-0.153	0.8781	--++--+	0.984	0.325	?+?????
3	ABCF3	6	MISSLOF	TRUE	0.0001	37 (1)	10 (0)	1.45 [0.66-3.21]	0.33971	1.42 [0.63-3.22]	0.38415	48834 [0-2.2442E+172]	0.38378	0.843	0.3994	+-	0.784	0.4328	+-	0.807	0.4199	+?	0.833	0.4049	-+-+-++	0.833	0.4049	-+-+-++	0.522	0.6018	??????+
3	ABCF3	9	MISSLOF	FALSE	0.0001	44 (1)	11 (0)	1.46 [0.69-3.08]	0.30687	1.43 [0.67-3.09]	0.34584	48834 [0-2.2442E+172]	0.38378	0.897	0.3699	+-	0.841	0.4003	+-	0.807	0.4199	+?	1.301	0.1931	-+++-++	1.301	0.1931	-+++-++	0.522	0.6018	??????+
3	ABCF3	5	MISSLOF	TRUE	0.001	68 (1)	15 (0)	1.55 [0.82-2.91]	0.15981	1.53 [0.81-2.91]	0.17891	48834 [0-2.2442E+172]	0.38378	0.961	0.3368	+-	0.918	0.3588	+-	0.807	0.4199	+?	1.616	0.106	+++++--	1.557	0.1196	+++++--	0.522	0.6018	??????+
3	ABCF3	8	MISSLOF	FALSE	0.001	82 (1)	18 (0)	1.48 [0.84-2.63]	0.16521	1.47 [0.82-2.63]	0.18398	48834 [0-2.2442E+172]	0.38378	1.296	0.1948	++	1.25	0.2111	++	0.807	0.4199	+?	1.744	0.0812	+++++--	1.685	0.09197	+++++--	0.522	0.6018	??????+
3	ABCF3	4	MISSLOF	TRUE	0.01	104 (1)	30 (0)	1.77 [1.11-2.84]	0.013087	1.77 [1.1-2.84]	0.014452	48834 [0-2.2442E+172]	0.38378	1.798	0.07222	+-	1.771	0.07651	+-	0.807	0.4199	+?	2.214	0.02682	+++++--	2.156	0.03107	+++++--	0.522	0.6018	??????+
3	ABCF3	7	MISSLOF	FALSE	0.01	146 (2)	43 (0)	1.47 [0.99-2.18]	0.049658	1.47 [0.98-2.19]	0.05507	125260 [0-3.2887E+199]	0.22708	1.604	0.1087	+-	1.581	0.1139	+-	1.13	0.2584	+?	2.05	0.04037	+-++++-	1.935	0.05303	+-++++-	1.114	0.2653	????+?+
21	ABCG1	6	MISSLOF	TRUE	0.0001	5 (0)	2 (0)	0.72 [0.09-5.66]	0.75361	0.72 [0.09-5.66]	0.75361	NA	NA	-0.253	0.8004	-+	-0.253	0.8004	-+	NA	NA	NA	-0.039	0.9689	+??-?++	-0.039	0.9689	+??-?++	NA	NA	NA
21	ABCG1	9	MISSLOF	FALSE	0.0001	19 (1)	10 (0)	0.69 [0.29-1.61]	0.3927	0.61 [0.24-1.53]	0.30054	36146 [0-1.6609E+172]	0.44282	-1.01	0.3125	-+	-1.085	0.2777	-+	0.963	0.3356	?+	-0.331	0.7407	+-+--++	-0.6	0.5484	+-+--++	1.104	0.2698	???+???
21	ABCG1	5	MISSLOF	TRUE	0.001	8 (0)	3 (0)	1 [0.21-4.71]	0.9996	1 [0.21-4.71]	0.9996	NA	NA	-0.076	0.9392	-+	-0.076	0.9392	-+	NA	NA	NA	0.216	0.829	+??+?++	0.216	0.829	+??+?++	NA	NA	NA
21	ABCG1	8	MISSLOF	FALSE	0.001	39 (2)	18 (0)	0.7 [0.37-1.32]	0.28124	0.62 [0.31-1.22]	0.17445	109340 [0-1.7031E+200]	0.25564	-1.135	0.2562	-+	-1.427	0.1534	-+	1.163	0.2449	++	-0.421	0.6738	+-+--++	-0.79	0.4294	+-+--++	1.663	0.09633	???+???
21	ABCG1	4	MISSLOF	TRUE	0.01	8 (0)	3 (0)	1 [0.21-4.71]	0.9996	1 [0.21-4.71]	0.9996	NA	NA	-0.076	0.9392	-+	-0.076	0.9392	-+	NA	NA	NA	0.216	0.829	+??+?++	0.216	0.829	+??+?++	NA	NA	NA
21	ABCG1	7	MISSLOF	FALSE	0.01	39 (2)	18 (0)	0.7 [0.37-1.32]	0.28124	0.62 [0.31-1.22]	0.17445	109340 [0-1.7031E+200]	0.25564	-1.135	0.2562	-+	-1.427	0.1534	-+	1.163	0.2449	++	-0.421	0.6738	+-+--++	-0.79	0.4294	+-+--++	1.663	0.09633	???+???
4	ABCG2	3	LOF	-	0.0001	14 (0)	7 (0)	0.81 [0.28-2.34]	0.69392	0.81 [0.28-2.34]	0.69392	NA	NA	-0.38	0.7036	--	-0.38	0.7036	--	NA	NA	NA	-0.357	0.7212	+?---++	-0.357	0.7212	+?---++	NA	NA	NA
4	ABCG2	2	LOF	-	0.001	20 (0)	9 (0)	0.93 [0.38-2.3]	0.87499	0.93 [0.38-2.3]	0.87499	NA	NA	-0.259	0.7953	--	-0.259	0.7953	--	NA	NA	NA	-0.081	0.9357	+--+-++	-0.081	0.9357	+--+-++	NA	NA	NA
4	ABCG2	1	LOF	-	0.01	20 (0)	9 (0)	0.93 [0.38-2.3]	0.87499	0.93 [0.38-2.3]	0.87499	NA	NA	-0.259	0.7953	--	-0.259	0.7953	--	NA	NA	NA	-0.081	0.9357	+--+-++	-0.081	0.9357	+--+-++	NA	NA	NA
4	ABCG2	6	MISSLOF	TRUE	0.0001	35 (0)	17 (0)	0.92 [0.47-1.8]	0.8096	0.92 [0.47-1.8]	0.8096	NA	NA	-0.313	0.7546	-+	-0.313	0.7546	-+	NA	NA	NA	-0.031	0.9753	+--+-++	-0.031	0.9753	+--+-++	NA	NA	NA
4	ABCG2	9	MISSLOF	FALSE	0.0001	80 (0)	33 (0)	1.07 [0.66-1.73]	0.78109	1.07 [0.66-1.73]	0.78109	NA	NA	0.272	0.7853	-+	0.272	0.7853	-+	NA	NA	NA	0.317	0.7515	+--+-++	0.317	0.7515	+--+-++	NA	NA	NA
4	ABCG2	5	MISSLOF	TRUE	0.001	64 (0)	27 (0)	0.98 [0.58-1.64]	0.93157	0.98 [0.58-1.64]	0.93157	NA	NA	-0.212	0.8324	-+	-0.212	0.8324	-+	NA	NA	NA	0.444	0.6572	+--+-++	0.444	0.6572	+--+-++	NA	NA	NA
4	ABCG2	8	MISSLOF	FALSE	0.001	121 (0)	52 (0)	0.98 [0.67-1.44]	0.91829	0.98 [0.67-1.44]	0.91829	NA	NA	-0.196	0.8444	-+	-0.196	0.8444	-+	NA	NA	NA	0.407	0.6839	+--+-+-	0.407	0.6839	+--+-+-	NA	NA	NA
4	ABCG2	4	MISSLOF	TRUE	0.01	64 (0)	27 (0)	0.98 [0.58-1.64]	0.93157	0.98 [0.58-1.64]	0.93157	NA	NA	-0.212	0.8324	-+	-0.212	0.8324	-+	NA	NA	NA	0.444	0.6572	+--+-++	0.444	0.6572	+--+-++	NA	NA	NA
4	ABCG2	7	MISSLOF	FALSE	0.01	191 (1)	74 (0)	1.18 [0.86-1.61]	0.31191	1.17 [0.86-1.61]	0.31768	10749 [0-4.94E+171]	0.65974	0.262	0.7935	-+	0.275	0.7836	-+	0.428	0.669	+?	1.217	0.2236	+--+-+-	1.216	0.224	+--+-+-	0.117	0.9065	??????+
11	ABCG4	6	MISSLOF	TRUE	0.0001	6 (0)	1 (0)	2.92 [0.21-39.77]	0.38621	2.92 [0.21-39.77]	0.38621	NA	NA	1.229	0.2191	++	1.229	0.2191	++	NA	NA	NA	1.23	0.2188	+??++??	1.23	0.2188	+??++??	NA	NA	NA
11	ABCG4	9	MISSLOF	FALSE	0.0001	34 (0)	11 (0)	1.01 [0.46-2.23]	0.98046	1.01 [0.46-2.23]	0.98046	NA	NA	0.053	0.9578	-+	0.053	0.9578	-+	NA	NA	NA	0.95	0.342	+-++++-	0.95	0.342	+-++++-	NA	NA	NA
11	ABCG4	5	MISSLOF	TRUE	0.001	10 (0)	1 (0)	4.43 [0.41-47.64]	0.15742	4.43 [0.41-47.64]	0.15742	NA	NA	1.552	0.1208	++	1.552	0.1208	++	NA	NA	NA	1.673	0.09429	+++++??	1.673	0.09429	+++++??	NA	NA	NA
11	ABCG4	8	MISSLOF	FALSE	0.001	48 (0)	17 (0)	1.1 [0.58-2.11]	0.76286	1.1 [0.58-2.11]	0.76286	NA	NA	0.478	0.6323	++	0.478	0.6323	++	NA	NA	NA	0.826	0.409	+++++--	0.826	0.409	+++++--	NA	NA	NA
11	ABCG4	4	MISSLOF	TRUE	0.01	10 (0)	1 (0)	4.43 [0.41-47.64]	0.15742	4.43 [0.41-47.64]	0.15742	NA	NA	1.552	0.1208	++	1.552	0.1208	++	NA	NA	NA	1.673	0.09429	+++++??	1.673	0.09429	+++++??	NA	NA	NA
11	ABCG4	7	MISSLOF	FALSE	0.01	183 (4)	73 (1)	0.88 [0.64-1.22]	0.44919	0.88 [0.63-1.22]	0.44359	0.93 [0.06-14.55]	0.95884	-0.517	0.6054	+-	-0.525	0.5995	+-	0.086	0.9313	+?	-0.615	0.5385	+-+-+--	-0.568	0.57	+-+-+--	-0.844	0.3986	???-???
2	ABCG5	3	LOF	-	0.0001	3 (0)	1 (0)	2 [0.14-28.65]	0.60634	2 [0.14-28.65]	0.60634	NA	NA	0.156	0.8758	+-	0.156	0.8758	+-	NA	NA	NA	-0.1	0.9205	?+?-??+	-0.1	0.9205	?+?-??+	NA	NA	NA
2	ABCG5	2	LOF	-	0.001	4 (0)	1 (0)	2.66 [0.23-30.89]	0.41265	2.66 [0.23-30.89]	0.41265	NA	NA	0.584	0.5591	+-	0.584	0.5591	+-	NA	NA	NA	0.174	0.862	?+?-??+	0.174	0.862	?+?-??+	NA	NA	NA
2	ABCG5	1	LOF	-	0.01	4 (0)	1 (0)	2.66 [0.23-30.89]	0.41265	2.66 [0.23-30.89]	0.41265	NA	NA	0.584	0.5591	+-	0.584	0.5591	+-	NA	NA	NA	0.174	0.862	?+?-??+	0.174	0.862	?+?-??+	NA	NA	NA
2	ABCG5	6	MISSLOF	TRUE	0.0001	36 (0)	13 (0)	1.01 [0.49-2.09]	0.98269	1.01 [0.49-2.09]	0.98269	NA	NA	0.175	0.8608	++	0.175	0.8608	++	NA	NA	NA	0.125	0.9007	++----+	0.125	0.9007	++----+	NA	NA	NA
2	ABCG5	9	MISSLOF	FALSE	0.0001	52 (0)	25 (0)	0.74 [0.43-1.3]	0.3015	0.74 [0.43-1.3]	0.3015	NA	NA	-1.054	0.292	-+	-1.054	0.292	-+	NA	NA	NA	-0.56	0.5754	++----+	-0.56	0.5754	++----+	NA	NA	NA
2	ABCG5	5	MISSLOF	TRUE	0.001	47 (0)	16 (0)	1.27 [0.66-2.46]	0.46266	1.27 [0.66-2.46]	0.46266	NA	NA	0.675	0.4997	++	0.675	0.4997	++	NA	NA	NA	0.247	0.805	++--+-+	0.247	0.805	++--+-+	NA	NA	NA
2	ABCG5	8	MISSLOF	FALSE	0.001	79 (0)	32 (0)	0.87 [0.53-1.4]	0.56007	0.87 [0.53-1.4]	0.56007	NA	NA	-0.609	0.5427	-+	-0.609	0.5427	-+	NA	NA	NA	-0.526	0.5989	-+----+	-0.526	0.5989	-+----+	NA	NA	NA
2	ABCG5	4	MISSLOF	TRUE	0.01	151 (2)	54 (0)	0.92 [0.63-1.34]	0.6696	0.92 [0.63-1.34]	0.65773	11208 [0-6.6177E+196]	0.69183	0.185	0.853	+-	0.205	0.8375	+-	0.448	0.654	+?	-0.835	0.4038	+-----+	-0.837	0.4028	+-----+	0.177	0.8592	+??????
2	ABCG5	7	MISSLOF	FALSE	0.01	289 (3)	122 (0)	0.84 [0.65-1.09]	0.19686	0.83 [0.64-1.08]	0.1688	180420 [0-1.4183E+220]	0.22041	-0.293	0.7692	+-	-0.217	0.8279	+-	1.144	0.2527	+?	-1.335	0.1818	--+--++	-1.386	0.1656	--+--++	0.669	0.5035	+???+??
2	ABCG8	3	LOF	-	0.0001	9 (1)	3 (0)	1.81 [0.37-8.93]	0.45306	1.79 [0.34-9.4]	0.48604	17806 [0-8.1818E+171]	0.57657	0.6	0.5487	+-	0.574	0.5659	+-	0.547	0.5841	+?	1.384	0.1665	?-?++?+	1.384	0.1665	?-?++?+	0.237	0.8123	????+??
2	ABCG8	2	LOF	-	0.001	11 (1)	4 (0)	1.44 [0.38-5.56]	0.58332	1.41 [0.35-5.76]	0.6268	17806 [0-8.1818E+171]	0.57657	0.292	0.7702	+-	0.249	0.8032	+-	0.547	0.5841	+?	0.332	0.7402	?-?-+?+	0.332	0.7402	?-?-+?+	0.237	0.8123	????+??
2	ABCG8	1	LOF	-	0.01	11 (1)	4 (0)	1.44 [0.38-5.56]	0.58332	1.41 [0.35-5.76]	0.6268	17806 [0-8.1818E+171]	0.57657	0.292	0.7702	+-	0.249	0.8032	+-	0.547	0.5841	+?	0.332	0.7402	?-?-+?+	0.332	0.7402	?-?-+?+	0.237	0.8123	????+??
2	ABCG8	6	MISSLOF	TRUE	0.0001	54 (1)	18 (0)	1.37 [0.74-2.53]	0.31325	1.36 [0.73-2.54]	0.32789	17806 [0-8.1818E+171]	0.57657	0.395	0.6928	+-	0.365	0.7149	+-	0.547	0.5841	+?	0.565	0.5724	-++++--	0.561	0.575	-++++--	0.237	0.8123	????+??
2	ABCG8	9	MISSLOF	FALSE	0.0001	73 (1)	25 (0)	1.29 [0.76-2.18]	0.34097	1.28 [0.75-2.18]	0.35527	17806 [0-8.1818E+171]	0.57657	0.887	0.3752	+-	0.864	0.3877	+-	0.547	0.5841	+?	0.139	0.8897	-++-++-	0.135	0.8925	-++-++-	0.237	0.8123	????+??
2	ABCG8	5	MISSLOF	TRUE	0.001	100 (1)	25 (0)	1.47 [0.89-2.43]	0.1252	1.46 [0.88-2.43]	0.13075	17806 [0-8.1818E+171]	0.57657	0.69	0.4903	+-	0.669	0.5035	+-	0.547	0.5841	+?	1.488	0.1367	+++++-+	1.484	0.1377	+++++-+	0.237	0.8123	????+??
2	ABCG8	8	MISSLOF	FALSE	0.001	135 (1)	42 (0)	1.13 [0.76-1.69]	0.54603	1.13 [0.75-1.69]	0.56307	17806 [0-8.1818E+171]	0.57657	0.155	0.8766	+-	0.131	0.8959	+-	0.547	0.5841	+?	0.689	0.4906	-+-++++	0.685	0.4931	-+-++++	0.237	0.8123	????+??
2	ABCG8	4	MISSLOF	TRUE	0.01	196 (4)	61 (0)	1.01 [0.72-1.42]	0.95821	1 [0.71-1.41]	0.99344	69262 [0-2.2233E+222]	0.39185	-0.141	0.8881	+-	-0.074	0.9407	+-	0.9	0.3681	+?	0.172	0.8635	-++-+-+	0.178	0.8584	-++-+-+	0.237	0.8123	????+??
2	ABCG8	7	MISSLOF	FALSE	0.01	245 (4)	85 (1)	0.89 [0.66-1.2]	0.44108	0.9 [0.66-1.22]	0.49399	0.32 [0.03-3.1]	0.37632	1.058	0.2902	++	0.989	0.3229	++	0.795	0.4266	+?	-0.293	0.7697	-+--+++	-0.288	0.7733	-+--+++	0.237	0.8123	????+??
2	ABHD1	3	LOF	-	0.0001	6 (0)	2 (0)	0.67 [0.11-4.08]	0.67072	0.67 [0.11-4.08]	0.67072	NA	NA	-0.286	0.7751	-+	-0.286	0.7751	-+	NA	NA	NA	0.071	0.9432	-+?+???	0.071	0.9432	-+?+???	NA	NA	NA
2	ABHD1	2	LOF	-	0.001	8 (0)	8 (0)	0.44 [0.13-1.42]	0.16985	0.44 [0.13-1.42]	0.16985	NA	NA	-1.3	0.1935	--	-1.3	0.1935	--	NA	NA	NA	-0.812	0.4166	-+?--??	-0.812	0.4166	-+?--??	NA	NA	NA
2	ABHD1	1	LOF	-	0.01	8 (0)	8 (0)	0.44 [0.13-1.42]	0.16985	0.44 [0.13-1.42]	0.16985	NA	NA	-1.3	0.1935	--	-1.3	0.1935	--	NA	NA	NA	-0.812	0.4166	-+?--??	-0.812	0.4166	-+?--??	NA	NA	NA
2	ABHD1	6	MISSLOF	TRUE	0.0001	21 (0)	13 (1)	0.49 [0.22-1.07]	0.08318	0.53 [0.23-1.25]	0.15537	0.05 [0-4.21]	0.03979	-1.889	0.05888	-+	-1.631	0.1028	-+	-2.117	0.03424	-?	-0.811	0.4175	--++-++	-0.847	0.3971	--++-++	-1.5	0.1336	?-?????
2	ABHD1	9	MISSLOF	FALSE	0.0001	35 (0)	14 (1)	0.73 [0.36-1.49]	0.4017	0.82 [0.39-1.72]	0.59899	0.05 [0-4.21]	0.03979	-0.898	0.369	-+	1.238	0.2158	++	-2.117	0.03424	-?	-0.095	0.924	--++-++	-0.014	0.9891	--++-++	-1.5	0.1336	?-?????
2	ABHD1	5	MISSLOF	TRUE	0.001	37 (0)	23 (1)	0.65 [0.35-1.2]	0.1723	0.7 [0.37-1.31]	0.26836	0.05 [0-4.21]	0.03979	-1.282	0.2	-+	-1.034	0.3011	-+	-2.117	0.03424	-?	-0.288	0.7733	--++-++	-0.216	0.829	--++-++	-1.5	0.1336	?-?????
2	ABHD1	8	MISSLOF	FALSE	0.001	53 (0)	25 (1)	0.77 [0.44-1.35]	0.37315	0.83 [0.47-1.47]	0.51855	0.05 [0-4.21]	0.03979	-0.817	0.4138	-+	-0.573	0.5666	-+	-2.117	0.03424	-?	0.225	0.8222	--++-++	0.331	0.7404	--++-++	-1.5	0.1336	?-?????
2	ABHD1	4	MISSLOF	TRUE	0.01	53 (0)	25 (1)	0.82 [0.46-1.45]	0.50406	0.88 [0.49-1.58]	0.67779	0.05 [0-4.21]	0.03979	-0.619	0.5357	-+	-0.373	0.7092	-+	-2.117	0.03424	-?	0.151	0.8801	--++-++	0.264	0.7917	--++-++	-1.5	0.1336	?-?????
2	ABHD1	7	MISSLOF	FALSE	0.01	126 (1)	49 (2)	0.84 [0.56-1.24]	0.38162	0.89 [0.59-1.34]	0.57756	0.04 [0-0.74]	0.014104	0.284	0.7765	+-	0.316	0.7521	+-	-2.658	0.007867	--	0.573	0.5668	+-++--+	0.66	0.5094	+-++--+	-1.5	0.1336	?-?????
3	ABHD10	6	MISSLOF	TRUE	0.0001	19 (0)	3 (0)	1.83 [0.45-7.4]	0.36866	1.83 [0.45-7.4]	0.36866	NA	NA	0.995	0.3197	++	0.995	0.3197	++	NA	NA	NA	1.129	0.2589	++++++-	1.129	0.2589	++++++-	NA	NA	NA
3	ABHD10	9	MISSLOF	FALSE	0.0001	20 (0)	3 (0)	1.99 [0.5-7.88]	0.29926	1.99 [0.5-7.88]	0.29926	NA	NA	1.135	0.2564	++	1.135	0.2564	++	NA	NA	NA	1.272	0.2033	++++++-	1.272	0.2033	++++++-	NA	NA	NA
3	ABHD10	5	MISSLOF	TRUE	0.001	54 (0)	9 (1)	2.23 [1.03-4.82]	0.028428	2.64 [1.15-6.05]	0.013206	0 [0-5.4017E+162]	0.27719	2.303	0.02129	++	2.516	0.01189	++	-1.17	0.2422	-?	2.367	0.01793	++++++-	2.625	0.008657	++++++-	-1.17	0.242	????-??
3	ABHD10	8	MISSLOF	FALSE	0.001	59 (0)	9 (1)	2.42 [1.13-5.19]	0.013289	2.86 [1.26-6.49]	0.0057089	0 [0-5.4017E+162]	0.27719	2.491	0.01273	++	2.797	0.00515	++	-1.17	0.2422	-?	2.54	0.0111	++++++-	2.798	0.005144	++++++-	-1.17	0.242	????-??
3	ABHD10	4	MISSLOF	TRUE	0.01	88 (0)	15 (1)	1.91 [1.02-3.54]	0.031691	2.1 [1.1-4.03]	0.018195	0 [0-5.4017E+162]	0.27719	2.133	0.03296	++	2.301	0.02136	++	-1.17	0.2422	-?	1.882	0.05985	++++++-	2.14	0.03233	++++++-	-1.17	0.242	????-??
3	ABHD10	7	MISSLOF	FALSE	0.01	93 (0)	15 (1)	2.03 [1.1-3.75]	0.01649	2.24 [1.18-4.26]	0.0089642	0 [0-5.4017E+162]	0.27719	2.311	0.02082	++	2.556	0.0106	++	-1.17	0.2422	-?	2.147	0.03182	++++++-	2.405	0.01617	++++++-	-1.17	0.242	????-??
7	ABHD11	6	MISSLOF	TRUE	0.0001	4 (0)	2 (0)	0.81 [0.13-5.13]	0.82836	0.81 [0.13-5.13]	0.82836	NA	NA	0.6	0.5482	+-	0.6	0.5482	+-	NA	NA	NA	0.385	0.7004	?+?-+?+	0.385	0.7004	?+?-+?+	NA	NA	NA
7	ABHD11	9	MISSLOF	FALSE	0.0001	18 (0)	10 (0)	0.76 [0.31-1.87]	0.55447	0.76 [0.31-1.87]	0.55447	NA	NA	-0.643	0.52	--	-0.643	0.52	--	NA	NA	NA	-0.104	0.9175	+++--++	-0.104	0.9175	+++--++	NA	NA	NA
7	ABHD11	5	MISSLOF	TRUE	0.001	4 (0)	4 (0)	0.24 [0.05-1.16]	0.079581	0.24 [0.05-1.16]	0.079581	NA	NA	-1.623	0.1046	--	-1.623	0.1046	--	NA	NA	NA	-0.312	0.7552	?+?-+?-	-0.312	0.7552	?+?-+?-	NA	NA	NA
7	ABHD11	8	MISSLOF	FALSE	0.001	21 (0)	12 (0)	0.62 [0.27-1.42]	0.26857	0.62 [0.27-1.42]	0.26857	NA	NA	-1.143	0.253	--	-1.143	0.253	--	NA	NA	NA	-0.51	0.6101	+++--+-	-0.51	0.6101	+++--+-	NA	NA	NA
7	ABHD11	4	MISSLOF	TRUE	0.01	4 (0)	4 (0)	0.24 [0.05-1.16]	0.079581	0.24 [0.05-1.16]	0.079581	NA	NA	-1.623	0.1046	--	-1.623	0.1046	--	NA	NA	NA	-0.312	0.7552	?+?-+?-	-0.312	0.7552	?+?-+?-	NA	NA	NA
7	ABHD11	7	MISSLOF	FALSE	0.01	21 (0)	12 (0)	0.62 [0.27-1.42]	0.26857	0.62 [0.27-1.42]	0.26857	NA	NA	-1.143	0.253	--	-1.143	0.253	--	NA	NA	NA	-0.51	0.6101	+++--+-	-0.51	0.6101	+++--+-	NA	NA	NA
20	ABHD12	3	LOF	-	0.0001	2 (0)	1 (0)	0.62 [0.04-9.86]	0.73746	0.62 [0.04-9.86]	0.73746	NA	NA	-0.439	0.661	-?	-0.439	0.661	-?	NA	NA	NA	-0.514	0.607	????-??	-0.514	0.607	????-??	NA	NA	NA
20	ABHD12	2	LOF	-	0.001	2 (0)	1 (0)	0.62 [0.04-9.86]	0.73746	0.62 [0.04-9.86]	0.73746	NA	NA	-0.439	0.661	-?	-0.439	0.661	-?	NA	NA	NA	-0.514	0.607	????-??	-0.514	0.607	????-??	NA	NA	NA
20	ABHD12	1	LOF	-	0.01	2 (0)	1 (0)	0.62 [0.04-9.86]	0.73746	0.62 [0.04-9.86]	0.73746	NA	NA	-0.439	0.661	-?	-0.439	0.661	-?	NA	NA	NA	-0.514	0.607	????-??	-0.514	0.607	????-??	NA	NA	NA
20	ABHD12	6	MISSLOF	TRUE	0.0001	4 (0)	3 (0)	0.43 [0.08-2.25]	0.32977	0.43 [0.08-2.25]	0.32977	NA	NA	-1.037	0.2999	--	-1.037	0.2999	--	NA	NA	NA	-0.785	0.4325	???--+?	-0.785	0.4325	???--+?	NA	NA	NA
20	ABHD12	9	MISSLOF	FALSE	0.0001	25 (0)	15 (0)	0.58 [0.27-1.21]	0.15175	0.58 [0.27-1.21]	0.15175	NA	NA	-1.338	0.181	-+	-1.338	0.181	-+	NA	NA	NA	-1.067	0.2859	+++--+-	-1.067	0.2859	+++--+-	NA	NA	NA
20	ABHD12	5	MISSLOF	TRUE	0.001	6 (0)	3 (0)	0.78 [0.17-3.52]	0.74764	0.78 [0.17-3.52]	0.74764	NA	NA	-0.353	0.7238	--	-0.353	0.7238	--	NA	NA	NA	-0.358	0.7205	??+--+?	-0.358	0.7205	??+--+?	NA	NA	NA
20	ABHD12	8	MISSLOF	FALSE	0.001	37 (0)	23 (0)	0.61 [0.33-1.11]	0.1112	0.61 [0.33-1.11]	0.1112	NA	NA	-1.626	0.104	-+	-1.626	0.104	-+	NA	NA	NA	-1.472	0.141	-+-----	-1.472	0.141	-+-----	NA	NA	NA
20	ABHD12	4	MISSLOF	TRUE	0.01	7 (0)	4 (0)	0.8 [0.21-3.09]	0.7476	0.8 [0.21-3.09]	0.7476	NA	NA	-0.279	0.7802	--	-0.279	0.7802	--	NA	NA	NA	-0.269	0.7877	??+--+?	-0.269	0.7877	??+--+?	NA	NA	NA
20	ABHD12	7	MISSLOF	FALSE	0.01	52 (0)	27 (0)	0.63 [0.37-1.1]	0.11028	0.63 [0.37-1.1]	0.11028	NA	NA	-1.575	0.1152	-+	-1.575	0.1152	-+	NA	NA	NA	-1.995	0.04601	++-----	-1.995	0.04601	++-----	NA	NA	NA
14	ABHD12B	3	LOF	-	0.0001	3 (0)	1 (0)	1.07 [0.09-12.15]	0.95924	1.07 [0.09-12.15]	0.95924	NA	NA	-0.485	0.628	-+	-0.485	0.628	-+	NA	NA	NA	0.361	0.7178	???+??+	0.361	0.7178	???+??+	NA	NA	NA
14	ABHD12B	2	LOF	-	0.001	3 (0)	1 (0)	1.07 [0.09-12.15]	0.95924	1.07 [0.09-12.15]	0.95924	NA	NA	-0.485	0.628	-+	-0.485	0.628	-+	NA	NA	NA	0.361	0.7178	???+??+	0.361	0.7178	???+??+	NA	NA	NA
14	ABHD12B	1	LOF	-	0.01	17 (0)	10 (0)	0.94 [0.37-2.36]	0.89345	0.94 [0.37-2.36]	0.89345	NA	NA	-0.294	0.7684	-+	-0.294	0.7684	-+	NA	NA	NA	0.036	0.9711	?-?+??+	0.036	0.9711	?-?+??+	NA	NA	NA
14	ABHD12B	6	MISSLOF	TRUE	0.0001	14 (0)	9 (0)	0.49 [0.19-1.24]	0.14066	0.49 [0.19-1.24]	0.14066	NA	NA	-1.256	0.2092	-+	-1.256	0.2092	-+	NA	NA	NA	-1.198	0.2309	-+?--?+	-1.198	0.2309	-+?--?+	NA	NA	NA
14	ABHD12B	9	MISSLOF	FALSE	0.0001	23 (0)	12 (0)	0.64 [0.29-1.41]	0.27801	0.64 [0.29-1.41]	0.27801	NA	NA	-0.874	0.3822	-+	-0.874	0.3822	-+	NA	NA	NA	-0.802	0.4224	-+?--++	-0.802	0.4224	-+?--++	NA	NA	NA
14	ABHD12B	5	MISSLOF	TRUE	0.001	28 (1)	13 (0)	0.76 [0.36-1.57]	0.46216	0.74 [0.35-1.56]	0.43477	9290.8 [0-4.2691E+171]	0.68118	-0.541	0.5886	-+	-0.593	0.5532	-+	0.417	0.6768	+?	-0.805	0.4206	-+?---+	-0.908	0.3641	-+?---+	0.267	0.7896	????+??
14	ABHD12B	8	MISSLOF	FALSE	0.001	50 (1)	18 (0)	0.97 [0.53-1.79]	0.92033	0.96 [0.52-1.78]	0.89921	9290.8 [0-4.2691E+171]	0.68118	-0.195	0.8456	-+	-0.225	0.8223	-+	0.417	0.6768	+?	-0.039	0.9686	-+?---+	-0.125	0.9003	-+?---+	0.267	0.7896	????+??
14	ABHD12B	4	MISSLOF	TRUE	0.01	42 (1)	22 (0)	0.81 [0.45-1.47]	0.49014	0.8 [0.44-1.46]	0.46942	9290.8 [0-4.2691E+171]	0.68118	-0.782	0.4343	-+	-0.823	0.4103	-+	0.417	0.6768	+?	-0.707	0.4797	-+?---+	-0.809	0.4186	-+?---+	0.267	0.7896	????+??
14	ABHD12B	7	MISSLOF	FALSE	0.01	88 (1)	38 (0)	0.97 [0.62-1.51]	0.88675	0.96 [0.62-1.51]	0.87154	9290.8 [0-4.2691E+171]	0.68118	-0.224	0.8229	-+	-0.245	0.8062	-+	0.417	0.6768	+?	0.371	0.7103	-+?-+-+	0.39	0.6962	-+?-+-+	0.267	0.7896	????+??
13	ABHD13	6	MISSLOF	TRUE	0.0001	3 (0)	0 (0)	86862 [0-4.0238E+154]	0.19738	86862 [0-4.0238E+154]	0.19738	NA	NA	0.993	0.3206	++	0.993	0.3206	++	NA	NA	NA	1.373	0.1698	?++????	1.373	0.1698	?++????	NA	NA	NA
13	ABHD13	9	MISSLOF	FALSE	0.0001	12 (0)	10 (0)	0.48 [0.18-1.32]	0.16308	0.48 [0.18-1.32]	0.16308	NA	NA	-1.489	0.1366	--	-1.489	0.1366	--	NA	NA	NA	-0.779	0.4361	+-+--++	-0.779	0.4361	+-+--++	NA	NA	NA
13	ABHD13	5	MISSLOF	TRUE	0.001	3 (0)	0 (0)	86862 [0-4.0238E+154]	0.19738	86862 [0-4.0238E+154]	0.19738	NA	NA	0.993	0.3206	++	0.993	0.3206	++	NA	NA	NA	1.373	0.1698	?++????	1.373	0.1698	?++????	NA	NA	NA
13	ABHD13	8	MISSLOF	FALSE	0.001	18 (0)	10 (0)	0.76 [0.3-1.92]	0.56603	0.76 [0.3-1.92]	0.56603	NA	NA	-0.693	0.4885	--	-0.693	0.4885	--	NA	NA	NA	-0.482	0.6298	+-+--++	-0.482	0.6298	+-+--++	NA	NA	NA
13	ABHD13	4	MISSLOF	TRUE	0.01	3 (0)	0 (0)	86862 [0-4.0238E+154]	0.19738	86862 [0-4.0238E+154]	0.19738	NA	NA	0.993	0.3206	++	0.993	0.3206	++	NA	NA	NA	1.373	0.1698	?++????	1.373	0.1698	?++????	NA	NA	NA
13	ABHD13	7	MISSLOF	FALSE	0.01	18 (0)	10 (0)	0.76 [0.3-1.92]	0.56603	0.76 [0.3-1.92]	0.56603	NA	NA	-0.693	0.4885	--	-0.693	0.4885	--	NA	NA	NA	-0.482	0.6298	+-+--++	-0.482	0.6298	+-+--++	NA	NA	NA
3	ABHD14A	6	MISSLOF	TRUE	0.0001	17 (0)	3 (0)	1.78 [0.46-6.85]	0.38205	1.78 [0.46-6.85]	0.38205	NA	NA	0.922	0.3567	++	0.922	0.3567	++	NA	NA	NA	1.209	0.2268	?++++-+	1.209	0.2268	?++++-+	NA	NA	NA
3	ABHD14A	9	MISSLOF	FALSE	0.0001	27 (0)	6 (0)	1.87 [0.69-5.09]	0.20386	1.87 [0.69-5.09]	0.20386	NA	NA	1.185	0.2359	++	1.185	0.2359	++	NA	NA	NA	1.481	0.1385	?+-++-+	1.481	0.1385	?+-++-+	NA	NA	NA
3	ABHD14A	5	MISSLOF	TRUE	0.001	25 (0)	5 (0)	1.42 [0.49-4.13]	0.5123	1.42 [0.49-4.13]	0.5123	NA	NA	0.95	0.3422	+-	0.95	0.3422	+-	NA	NA	NA	1.042	0.2976	?++++-+	1.042	0.2976	?++++-+	NA	NA	NA
3	ABHD14A	8	MISSLOF	FALSE	0.001	46 (0)	9 (0)	2.01 [0.89-4.53]	0.076126	2.01 [0.89-4.53]	0.076126	NA	NA	1.786	0.07405	++	1.786	0.07405	++	NA	NA	NA	1.85	0.06434	?+-++-+	1.85	0.06434	?+-++-+	NA	NA	NA
3	ABHD14A	4	MISSLOF	TRUE	0.01	70 (0)	18 (0)	1.56 [0.87-2.8]	0.12887	1.56 [0.87-2.8]	0.12887	NA	NA	1.284	0.1993	+-	1.284	0.1993	+-	NA	NA	NA	1.504	0.1325	+++-+-+	1.504	0.1325	+++-+-+	NA	NA	NA
3	ABHD14A	7	MISSLOF	FALSE	0.01	114 (0)	32 (0)	1.55 [0.99-2.45]	0.051771	1.55 [0.99-2.45]	0.051771	NA	NA	1.713	0.08674	++	1.713	0.08674	++	NA	NA	NA	1.282	0.1998	++--+-+	1.282	0.1998	++--+-+	NA	NA	NA
3	ABHD14B	1	LOF	-	0.01	66 (0)	21 (0)	1.38 [0.78-2.44]	0.25746	1.38 [0.78-2.44]	0.25746	NA	NA	1.037	0.2996	++	1.037	0.2996	++	NA	NA	NA	2.243	0.02488	?+++++?	2.243	0.02488	?+++++?	NA	NA	NA
3	ABHD14B	6	MISSLOF	TRUE	0.0001	10 (0)	1 (0)	2.13 [0.25-18]	0.45061	2.13 [0.25-18]	0.45061	NA	NA	0.646	0.5183	++	0.646	0.5183	++	NA	NA	NA	0.945	0.3445	++++-+?	0.945	0.3445	++++-+?	NA	NA	NA
3	ABHD14B	9	MISSLOF	FALSE	0.0001	18 (0)	5 (0)	1.21 [0.42-3.52]	0.72395	1.21 [0.42-3.52]	0.72395	NA	NA	0.476	0.6339	++	0.476	0.6339	++	NA	NA	NA	0.406	0.6847	--++-+?	0.406	0.6847	--++-+?	NA	NA	NA
3	ABHD14B	5	MISSLOF	TRUE	0.001	14 (0)	2 (0)	1.42 [0.3-6.78]	0.64704	1.42 [0.3-6.78]	0.64704	NA	NA	0.428	0.6684	++	0.428	0.6684	++	NA	NA	NA	0.95	0.3422	++++-+-	0.95	0.3422	++++-+-	NA	NA	NA
3	ABHD14B	8	MISSLOF	FALSE	0.001	22 (0)	6 (0)	1.12 [0.42-2.98]	0.81985	1.12 [0.42-2.98]	0.81985	NA	NA	0.339	0.7343	++	0.339	0.7343	++	NA	NA	NA	0.407	0.6838	--++-+-	0.407	0.6838	--++-+-	NA	NA	NA
3	ABHD14B	4	MISSLOF	TRUE	0.01	80 (0)	23 (0)	1.39 [0.81-2.38]	0.22034	1.39 [0.81-2.38]	0.22034	NA	NA	1.085	0.2778	++	1.085	0.2778	++	NA	NA	NA	1.999	0.04556	++++++-	1.999	0.04556	++++++-	NA	NA	NA
3	ABHD14B	7	MISSLOF	FALSE	0.01	114 (0)	54 (0)	1.02 [0.7-1.49]	0.91884	1.02 [0.7-1.49]	0.91884	NA	NA	-0.17	0.8653	--	-0.17	0.8653	--	NA	NA	NA	0.688	0.4913	-++-++-	0.688	0.4913	-++-++-	NA	NA	NA
17	ABHD15	3	LOF	-	0.0001	4 (0)	3 (0)	0.29 [0.05-1.82]	0.19604	0.29 [0.05-1.82]	0.19604	NA	NA	-1.566	0.1174	-+	-1.566	0.1174	-+	NA	NA	NA	-0.811	0.4175	???-+?+	-0.811	0.4175	???-+?+	NA	NA	NA
17	ABHD15	2	LOF	-	0.001	4 (0)	4 (0)	0.24 [0.04-1.29]	0.095208	0.24 [0.04-1.29]	0.095208	NA	NA	-1.833	0.06687	--	-1.833	0.06687	--	NA	NA	NA	-1.061	0.2886	???-+?+	-1.061	0.2886	???-+?+	NA	NA	NA
17	ABHD15	1	LOF	-	0.01	16 (0)	17 (0)	0.56 [0.25-1.25]	0.15819	0.56 [0.25-1.25]	0.15819	NA	NA	-1.535	0.1249	--	-1.535	0.1249	--	NA	NA	NA	-0.845	0.3979	?-?-+?+	-0.845	0.3979	?-?-+?+	NA	NA	NA
17	ABHD15	6	MISSLOF	TRUE	0.0001	25 (0)	11 (0)	1.09 [0.46-2.56]	0.84855	1.09 [0.46-2.56]	0.84855	NA	NA	-0.122	0.9027	-+	-0.122	0.9027	-+	NA	NA	NA	0.15	0.8809	+-+-+++	0.15	0.8809	+-+-+++	NA	NA	NA
17	ABHD15	9	MISSLOF	FALSE	0.0001	35 (0)	17 (0)	0.97 [0.49-1.94]	0.94252	0.97 [0.49-1.94]	0.94252	NA	NA	-0.791	0.429	--	-0.791	0.429	--	NA	NA	NA	0.113	0.9097	+-+-+++	0.113	0.9097	+-+-+++	NA	NA	NA
17	ABHD15	5	MISSLOF	TRUE	0.001	50 (0)	16 (0)	1.5 [0.79-2.87]	0.20856	1.5 [0.79-2.87]	0.20856	NA	NA	1.022	0.3065	+-	1.022	0.3065	+-	NA	NA	NA	0.654	0.5133	+-+-+-+	0.654	0.5133	+-+-+-+	NA	NA	NA
17	ABHD15	8	MISSLOF	FALSE	0.001	66 (0)	24 (0)	1.44 [0.84-2.47]	0.17712	1.44 [0.84-2.47]	0.17712	NA	NA	1.172	0.2412	+-	1.172	0.2412	+-	NA	NA	NA	1.108	0.2678	+-+-+-+	1.108	0.2678	+-+-+-+	NA	NA	NA
17	ABHD15	4	MISSLOF	TRUE	0.01	62 (0)	29 (0)	1.18 [0.7-1.99]	0.52225	1.18 [0.7-1.99]	0.52225	NA	NA	-0.89	0.3733	--	-0.89	0.3733	--	NA	NA	NA	0.47	0.6381	+-+-+-+	0.47	0.6381	+-+-+-+	NA	NA	NA
17	ABHD15	7	MISSLOF	FALSE	0.01	144 (1)	65 (0)	1.29 [0.92-1.83]	0.13916	1.29 [0.91-1.82]	0.14593	25248 [0-1.1601E+172]	0.51246	-0.664	0.5066	-+	-0.637	0.5242	-+	0.671	0.5022	+?	0.963	0.3358	-++-+-+	0.984	0.325	-++-+-+	0.593	0.553	???+???
6	ABHD16A	6	MISSLOF	TRUE	0.0001	2 (0)	1 (0)	0.11 [0.01-1.25]	0.12858	0.11 [0.01-1.25]	0.12858	NA	NA	0.965	0.3345	?+	0.965	0.3345	?+	NA	NA	NA	-1.574	0.1155	?-?????	-1.574	0.1155	?-?????	NA	NA	NA
6	ABHD16A	9	MISSLOF	FALSE	0.0001	20 (1)	11 (0)	0.88 [0.38-2.03]	0.75934	0.84 [0.35-2.01]	0.69917	19036 [0-8.7484E+171]	0.56506	-0.811	0.4171	--	-0.744	0.4571	--	0.635	0.5254	+?	-1.188	0.2348	-----+?	-1.213	0.2253	-----+?	0.3	0.7641	??+????
6	ABHD16A	5	MISSLOF	TRUE	0.001	2 (0)	2 (0)	0.09 [0.01-0.93]	0.063185	0.09 [0.01-0.93]	0.063185	NA	NA	-0.541	0.5887	-+	-0.541	0.5887	-+	NA	NA	NA	-1.553	0.1204	?-?-???	-1.553	0.1204	?-?-???	NA	NA	NA
6	ABHD16A	8	MISSLOF	FALSE	0.001	35 (1)	14 (0)	1.01 [0.5-2.04]	0.98556	0.99 [0.48-2.03]	0.97012	19036 [0-8.7484E+171]	0.56506	0.032	0.9746	-+	0.091	0.9278	-+	0.635	0.5254	+?	-0.449	0.6538	---+-++	-0.472	0.6368	---+-++	0.3	0.7641	??+????
6	ABHD16A	4	MISSLOF	TRUE	0.01	2 (0)	2 (0)	0.09 [0.01-0.93]	0.063185	0.09 [0.01-0.93]	0.063185	NA	NA	-0.541	0.5887	-+	-0.541	0.5887	-+	NA	NA	NA	-1.553	0.1204	?-?-???	-1.553	0.1204	?-?-???	NA	NA	NA
6	ABHD16A	7	MISSLOF	FALSE	0.01	74 (1)	39 (0)	0.9 [0.57-1.41]	0.63953	0.89 [0.56-1.4]	0.61095	19036 [0-8.7484E+171]	0.56506	-0.297	0.7661	--	-0.346	0.7291	--	0.635	0.5254	+?	-0.484	0.6284	-----++	-0.501	0.6163	-----++	0.3	0.7641	??+????
20	ABHD16B	3	LOF	-	0.0001	3 (0)	1 (0)	1.78 [0.16-19.6]	0.62702	1.78 [0.16-19.6]	0.62702	NA	NA	0.76	0.4475	+-	0.76	0.4475	+-	NA	NA	NA	0.452	0.6515	?+?-+??	0.452	0.6515	?+?-+??	NA	NA	NA
20	ABHD16B	2	LOF	-	0.001	3 (0)	3 (0)	0.51 [0.09-2.89]	0.44535	0.51 [0.09-2.89]	0.44535	NA	NA	-0.884	0.3767	--	-0.884	0.3767	--	NA	NA	NA	-0.281	0.7785	?+?-+??	-0.281	0.7785	?+?-+??	NA	NA	NA
20	ABHD16B	1	LOF	-	0.01	3 (0)	3 (0)	0.51 [0.09-2.89]	0.44535	0.51 [0.09-2.89]	0.44535	NA	NA	-0.884	0.3767	--	-0.884	0.3767	--	NA	NA	NA	-0.281	0.7785	?+?-+??	-0.281	0.7785	?+?-+??	NA	NA	NA
20	ABHD16B	6	MISSLOF	TRUE	0.0001	33 (0)	9 (0)	1.56 [0.67-3.65]	0.29487	1.56 [0.67-3.65]	0.29487	NA	NA	0.153	0.8782	+-	0.153	0.8782	+-	NA	NA	NA	1.963	0.04962	+--++++	1.963	0.04962	+--++++	NA	NA	NA
20	ABHD16B	9	MISSLOF	FALSE	0.0001	40 (0)	9 (0)	2.16 [0.94-4.96]	0.056954	2.16 [0.94-4.96]	0.056954	NA	NA	2.172	0.02983	++	2.172	0.02983	++	NA	NA	NA	2.751	0.005934	+--++++	2.751	0.005934	+--++++	NA	NA	NA
20	ABHD16B	5	MISSLOF	TRUE	0.001	65 (0)	21 (0)	0.96 [0.54-1.7]	0.88948	0.96 [0.54-1.7]	0.88948	NA	NA	0.93	0.3522	++	0.93	0.3522	++	NA	NA	NA	0.296	0.7674	----+++	0.296	0.7674	----+++	NA	NA	NA
20	ABHD16B	8	MISSLOF	FALSE	0.001	82 (0)	26 (0)	1.12 [0.67-1.88]	0.656	1.12 [0.67-1.88]	0.656	NA	NA	0.118	0.9059	+-	0.118	0.9059	+-	NA	NA	NA	0.979	0.3276	+--++++	0.979	0.3276	+--++++	NA	NA	NA
20	ABHD16B	4	MISSLOF	TRUE	0.01	116 (0)	38 (0)	0.83 [0.54-1.3]	0.42772	0.83 [0.54-1.3]	0.42772	NA	NA	0.558	0.5765	+-	0.558	0.5765	+-	NA	NA	NA	-0.568	0.5698	------+	-0.568	0.5698	------+	NA	NA	NA
20	ABHD16B	7	MISSLOF	FALSE	0.01	192 (0)	65 (0)	0.96 [0.68-1.35]	0.8214	0.96 [0.68-1.35]	0.8214	NA	NA	-0.136	0.8921	+-	-0.136	0.8921	+-	NA	NA	NA	-0.108	0.9138	---++-+	-0.108	0.9138	---++-+	NA	NA	NA
19	ABHD17A	3	LOF	-	0.0001	6 (0)	0 (0)	59378 [0-7.18E+174]	0.31404	59378 [0-7.18E+174]	0.31404	NA	NA	1.006	0.3145	+?	1.006	0.3145	+?	NA	NA	NA	0.901	0.3676	????+?+	0.901	0.3676	????+?+	NA	NA	NA
19	ABHD17A	2	LOF	-	0.001	6 (0)	0 (0)	59378 [0-7.18E+174]	0.31404	59378 [0-7.18E+174]	0.31404	NA	NA	1.006	0.3145	+?	1.006	0.3145	+?	NA	NA	NA	0.901	0.3676	????+?+	0.901	0.3676	????+?+	NA	NA	NA
19	ABHD17A	1	LOF	-	0.01	6 (0)	0 (0)	59378 [0-7.18E+174]	0.31404	59378 [0-7.18E+174]	0.31404	NA	NA	1.006	0.3145	+?	1.006	0.3145	+?	NA	NA	NA	0.901	0.3676	????+?+	0.901	0.3676	????+?+	NA	NA	NA
19	ABHD17A	6	MISSLOF	TRUE	0.0001	6 (0)	0 (0)	59378 [0-7.18E+174]	0.31404	59378 [0-7.18E+174]	0.31404	NA	NA	1.006	0.3145	+?	1.006	0.3145	+?	NA	NA	NA	0.901	0.3676	????+?+	0.901	0.3676	????+?+	NA	NA	NA
19	ABHD17A	9	MISSLOF	FALSE	0.0001	20 (0)	5 (0)	1.5 [0.51-4.44]	0.45276	1.5 [0.51-4.44]	0.45276	NA	NA	0.798	0.425	++	0.798	0.425	++	NA	NA	NA	1.244	0.2137	?+++-?+	1.244	0.2137	?+++-?+	NA	NA	NA
19	ABHD17A	5	MISSLOF	TRUE	0.001	6 (0)	0 (0)	59378 [0-7.18E+174]	0.31404	59378 [0-7.18E+174]	0.31404	NA	NA	1.006	0.3145	+?	1.006	0.3145	+?	NA	NA	NA	0.901	0.3676	????+?+	0.901	0.3676	????+?+	NA	NA	NA
19	ABHD17A	8	MISSLOF	FALSE	0.001	26 (0)	6 (0)	1.63 [0.61-4.33]	0.31397	1.63 [0.61-4.33]	0.31397	NA	NA	1.209	0.2265	++	1.209	0.2265	++	NA	NA	NA	1.36	0.1739	++++-?+	1.36	0.1739	++++-?+	NA	NA	NA
19	ABHD17A	4	MISSLOF	TRUE	0.01	6 (0)	0 (0)	59378 [0-7.18E+174]	0.31404	59378 [0-7.18E+174]	0.31404	NA	NA	1.006	0.3145	+?	1.006	0.3145	+?	NA	NA	NA	0.901	0.3676	????+?+	0.901	0.3676	????+?+	NA	NA	NA
19	ABHD17A	7	MISSLOF	FALSE	0.01	136 (1)	39 (1)	1.35 [0.89-2.05]	0.14718	1.37 [0.9-2.1]	0.13688	0.97 [0.04-23.01]	0.98262	1.539	0.1238	++	1.56	0.1188	++	0.352	0.7246	+-	1.947	0.05154	--+++++	1.971	0.04874	--+++++	-0.301	0.7631	+??-???
9	ABHD17B	6	MISSLOF	TRUE	0.0001	9 (0)	2 (0)	2.37 [0.46-12.29]	0.27569	2.37 [0.46-12.29]	0.27569	NA	NA	1.223	0.2212	+-	1.223	0.2212	+-	NA	NA	NA	1.13	0.2587	?+?+?+?	1.13	0.2587	?+?+?+?	NA	NA	NA
9	ABHD17B	9	MISSLOF	FALSE	0.0001	9 (0)	2 (0)	2.37 [0.46-12.29]	0.27569	2.37 [0.46-12.29]	0.27569	NA	NA	1.223	0.2212	+-	1.223	0.2212	+-	NA	NA	NA	1.13	0.2587	?+?+?+?	1.13	0.2587	?+?+?+?	NA	NA	NA
9	ABHD17B	5	MISSLOF	TRUE	0.001	10 (0)	4 (0)	1.19 [0.32-4.42]	0.79117	1.19 [0.32-4.42]	0.79117	NA	NA	0.343	0.7316	+-	0.343	0.7316	+-	NA	NA	NA	0.951	0.3417	?+-+?+?	0.951	0.3417	?+-+?+?	NA	NA	NA
9	ABHD17B	8	MISSLOF	FALSE	0.001	10 (0)	4 (0)	1.19 [0.32-4.42]	0.79117	1.19 [0.32-4.42]	0.79117	NA	NA	0.343	0.7316	+-	0.343	0.7316	+-	NA	NA	NA	0.951	0.3417	?+-+?+?	0.951	0.3417	?+-+?+?	NA	NA	NA
9	ABHD17B	4	MISSLOF	TRUE	0.01	10 (0)	4 (0)	1.19 [0.32-4.42]	0.79117	1.19 [0.32-4.42]	0.79117	NA	NA	0.343	0.7316	+-	0.343	0.7316	+-	NA	NA	NA	0.951	0.3417	?+-+?+?	0.951	0.3417	?+-+?+?	NA	NA	NA
9	ABHD17B	7	MISSLOF	FALSE	0.01	10 (0)	4 (0)	1.19 [0.32-4.42]	0.79117	1.19 [0.32-4.42]	0.79117	NA	NA	0.343	0.7316	+-	0.343	0.7316	+-	NA	NA	NA	0.951	0.3417	?+-+?+?	0.951	0.3417	?+-+?+?	NA	NA	NA
15	ABHD17C	9	MISSLOF	FALSE	0.0001	3 (0)	0 (0)	81638 [0-2.8083E+164]	0.22027	81638 [0-2.8083E+164]	0.22027	NA	NA	1.168	0.2429	++	1.168	0.2429	++	NA	NA	NA	1.209	0.2266	???++??	1.209	0.2266	???++??	NA	NA	NA
15	ABHD17C	8	MISSLOF	FALSE	0.001	3 (0)	0 (0)	81638 [0-2.8083E+164]	0.22027	81638 [0-2.8083E+164]	0.22027	NA	NA	1.168	0.2429	++	1.168	0.2429	++	NA	NA	NA	1.209	0.2266	???++??	1.209	0.2266	???++??	NA	NA	NA
15	ABHD17C	7	MISSLOF	FALSE	0.01	3 (0)	0 (0)	81638 [0-2.8083E+164]	0.22027	81638 [0-2.8083E+164]	0.22027	NA	NA	1.168	0.2429	++	1.168	0.2429	++	NA	NA	NA	1.209	0.2266	???++??	1.209	0.2266	???++??	NA	NA	NA
15	ABHD2	6	MISSLOF	TRUE	0.0001	8 (1)	4 (0)	1.35 [0.3-6.19]	0.69235	1.33 [0.27-6.41]	0.72367	9290.8 [0-4.2691E+171]	0.68118	-0.298	0.7656	+-	-0.359	0.7195	+-	0.417	0.6768	+?	-0.735	0.4624	+??--+?	-0.857	0.3912	+??--+?	0.267	0.7896	????+??
15	ABHD2	9	MISSLOF	FALSE	0.0001	12 (1)	5 (0)	1.11 [0.31-4.02]	0.8742	1.08 [0.28-4.1]	0.91183	9290.8 [0-4.2691E+171]	0.68118	0.223	0.8235	+-	0.18	0.857	+-	0.417	0.6768	+?	-0.231	0.8174	+??--+?	-0.353	0.7238	+??--+?	0.267	0.7896	????+??
15	ABHD2	5	MISSLOF	TRUE	0.001	11 (1)	7 (0)	0.7 [0.23-2.14]	0.53945	0.65 [0.2-2.16]	0.4865	9290.8 [0-4.2691E+171]	0.68118	-1.101	0.2707	--	-1.197	0.2312	--	0.417	0.6768	+?	-1.171	0.2415	-?---+?	-1.291	0.1968	-?---+?	0.267	0.7896	????+??
15	ABHD2	8	MISSLOF	FALSE	0.001	17 (1)	9 (0)	0.64 [0.25-1.65]	0.36903	0.6 [0.22-1.64]	0.32911	9290.8 [0-4.2691E+171]	0.68118	-0.77	0.4411	--	-0.848	0.3965	--	0.417	0.6768	+?	-0.658	0.5104	-?---+?	-0.778	0.4367	-?---+?	0.267	0.7896	????+??
15	ABHD2	4	MISSLOF	TRUE	0.01	11 (1)	7 (0)	0.7 [0.23-2.14]	0.53945	0.65 [0.2-2.16]	0.4865	9290.8 [0-4.2691E+171]	0.68118	-1.101	0.2707	--	-1.197	0.2312	--	0.417	0.6768	+?	-1.171	0.2415	-?---+?	-1.291	0.1968	-?---+?	0.267	0.7896	????+??
15	ABHD2	7	MISSLOF	FALSE	0.01	17 (1)	9 (0)	0.64 [0.25-1.65]	0.36903	0.6 [0.22-1.64]	0.32911	9290.8 [0-4.2691E+171]	0.68118	-0.77	0.4411	--	-0.848	0.3965	--	0.417	0.6768	+?	-0.658	0.5104	-?---+?	-0.778	0.4367	-?---+?	0.267	0.7896	????+??
18	ABHD3	3	LOF	-	0.0001	8 (0)	4 (0)	1.16 [0.29-4.63]	0.82817	1.16 [0.29-4.63]	0.82817	NA	NA	-0.413	0.6798	--	-0.413	0.6798	--	NA	NA	NA	0.548	0.5838	?-?+-??	0.548	0.5838	?-?+-??	NA	NA	NA
18	ABHD3	2	LOF	-	0.001	8 (0)	4 (0)	1.16 [0.29-4.63]	0.82817	1.16 [0.29-4.63]	0.82817	NA	NA	-0.413	0.6798	--	-0.413	0.6798	--	NA	NA	NA	0.548	0.5838	?-?+-??	0.548	0.5838	?-?+-??	NA	NA	NA
18	ABHD3	1	LOF	-	0.01	8 (0)	4 (0)	1.16 [0.29-4.63]	0.82817	1.16 [0.29-4.63]	0.82817	NA	NA	-0.413	0.6798	--	-0.413	0.6798	--	NA	NA	NA	0.548	0.5838	?-?+-??	0.548	0.5838	?-?+-??	NA	NA	NA
18	ABHD3	6	MISSLOF	TRUE	0.0001	17 (0)	7 (0)	0.91 [0.34-2.45]	0.85419	0.91 [0.34-2.45]	0.85419	NA	NA	-0.058	0.9535	-+	-0.058	0.9535	-+	NA	NA	NA	-0.299	0.7649	?-?++-+	-0.299	0.7649	?-?++-+	NA	NA	NA
18	ABHD3	9	MISSLOF	FALSE	0.0001	26 (0)	9 (0)	1 [0.42-2.38]	0.99661	1 [0.42-2.38]	0.99661	NA	NA	0.208	0.835	-+	0.208	0.835	-+	NA	NA	NA	-0.094	0.9251	+-+++-+	-0.094	0.9251	+-+++-+	NA	NA	NA
18	ABHD3	5	MISSLOF	TRUE	0.001	24 (0)	8 (0)	1.15 [0.47-2.82]	0.7634	1.15 [0.47-2.82]	0.7634	NA	NA	0.63	0.5286	++	0.63	0.5286	++	NA	NA	NA	0.111	0.9115	--?++-+	0.111	0.9115	--?++-+	NA	NA	NA
18	ABHD3	8	MISSLOF	FALSE	0.001	45 (0)	13 (0)	1.36 [0.68-2.72]	0.37626	1.36 [0.68-2.72]	0.37626	NA	NA	1.033	0.3014	++	1.033	0.3014	++	NA	NA	NA	0.706	0.4804	--+++-+	0.706	0.4804	--+++-+	NA	NA	NA
18	ABHD3	4	MISSLOF	TRUE	0.01	24 (0)	8 (0)	1.15 [0.47-2.82]	0.7634	1.15 [0.47-2.82]	0.7634	NA	NA	0.63	0.5286	++	0.63	0.5286	++	NA	NA	NA	0.111	0.9115	--?++-+	0.111	0.9115	--?++-+	NA	NA	NA
18	ABHD3	7	MISSLOF	FALSE	0.01	45 (0)	13 (0)	1.36 [0.68-2.72]	0.37626	1.36 [0.68-2.72]	0.37626	NA	NA	1.033	0.3014	++	1.033	0.3014	++	NA	NA	NA	0.706	0.4804	--+++-+	0.706	0.4804	--+++-+	NA	NA	NA
14	ABHD4	3	LOF	-	0.0001	3 (0)	3 (0)	0.41 [0.07-2.36]	0.31836	0.41 [0.07-2.36]	0.31836	NA	NA	-1.066	0.2863	-?	-1.066	0.2863	-?	NA	NA	NA	-0.098	0.9221	??-++-?	-0.098	0.9221	??-++-?	NA	NA	NA
14	ABHD4	2	LOF	-	0.001	4 (0)	4 (0)	0.48 [0.1-2.24]	0.35542	0.48 [0.1-2.24]	0.35542	NA	NA	-0.533	0.5939	-+	-0.533	0.5939	-+	NA	NA	NA	-0.589	0.5559	??-++-?	-0.589	0.5559	??-++-?	NA	NA	NA
14	ABHD4	1	LOF	-	0.01	4 (0)	4 (0)	0.48 [0.1-2.24]	0.35542	0.48 [0.1-2.24]	0.35542	NA	NA	-0.533	0.5939	-+	-0.533	0.5939	-+	NA	NA	NA	-0.589	0.5559	??-++-?	-0.589	0.5559	??-++-?	NA	NA	NA
14	ABHD4	6	MISSLOF	TRUE	0.0001	8 (0)	4 (0)	1.21 [0.31-4.74]	0.77774	1.21 [0.31-4.74]	0.77774	NA	NA	0.231	0.817	-+	0.231	0.817	-+	NA	NA	NA	0.835	0.4036	??-++-?	0.835	0.4036	??-++-?	NA	NA	NA
14	ABHD4	9	MISSLOF	FALSE	0.0001	25 (0)	9 (0)	1.42 [0.6-3.39]	0.41989	1.42 [0.6-3.39]	0.41989	NA	NA	0.839	0.4015	+-	0.839	0.4015	+-	NA	NA	NA	1.123	0.2613	?+-++-+	1.123	0.2613	?+-++-+	NA	NA	NA
14	ABHD4	5	MISSLOF	TRUE	0.001	9 (0)	5 (0)	1.14 [0.33-3.94]	0.83291	1.14 [0.33-3.94]	0.83291	NA	NA	0.122	0.9028	-+	0.122	0.9028	-+	NA	NA	NA	0.505	0.6134	??-++-?	0.505	0.6134	??-++-?	NA	NA	NA
14	ABHD4	8	MISSLOF	FALSE	0.001	55 (1)	15 (0)	1.83 [0.97-3.48]	0.053356	1.83 [0.96-3.49]	0.058888	40068 [0-1.8412E+172]	0.42257	1.869	0.06167	++	1.835	0.06656	++	0.715	0.4748	+?	1.3	0.1937	?--+++-	0.767	0.4429	?--++--	0.263	0.7922	?????+?
14	ABHD4	4	MISSLOF	TRUE	0.01	9 (0)	5 (0)	1.14 [0.33-3.94]	0.83291	1.14 [0.33-3.94]	0.83291	NA	NA	0.122	0.9028	-+	0.122	0.9028	-+	NA	NA	NA	0.505	0.6134	??-++-?	0.505	0.6134	??-++-?	NA	NA	NA
14	ABHD4	7	MISSLOF	FALSE	0.01	55 (1)	15 (0)	1.83 [0.97-3.48]	0.053356	1.83 [0.96-3.49]	0.058888	40068 [0-1.8412E+172]	0.42257	1.869	0.06167	++	1.835	0.06656	++	0.715	0.4748	+?	1.3	0.1937	?--+++-	0.767	0.4429	?--++--	0.263	0.7922	?????+?
3	ABHD5	6	MISSLOF	TRUE	0.0001	9 (0)	0 (0)	5.55 [0.24-130.91]	0.14784	5.55 [0.24-130.91]	0.14784	NA	NA	1.963	0.04961	++	1.963	0.04961	++	NA	NA	NA	2.014	0.044	++?++?+	2.014	0.044	++?++?+	NA	NA	NA
3	ABHD5	9	MISSLOF	FALSE	0.0001	16 (0)	3 (0)	1.6 [0.43-6.03]	0.46913	1.6 [0.43-6.03]	0.46913	NA	NA	0.827	0.4084	+-	0.827	0.4084	+-	NA	NA	NA	1.271	0.2038	++?+-?+	1.271	0.2038	++?+-?+	NA	NA	NA
3	ABHD5	5	MISSLOF	TRUE	0.001	9 (0)	1 (0)	3.35 [0.37-30.17]	0.22445	3.35 [0.37-30.17]	0.22445	NA	NA	1.161	0.2455	++	1.161	0.2455	++	NA	NA	NA	1.506	0.132	++?+-?+	1.506	0.132	++?+-?+	NA	NA	NA
3	ABHD5	8	MISSLOF	FALSE	0.001	37 (1)	6 (0)	2.36 [0.96-5.78]	0.040552	2.38 [0.95-5.94]	0.044665	55531 [0-2.5517E+172]	0.35802	2.13	0.03319	++	2.095	0.0362	++	0.955	0.3393	?+	2.956	0.003114	++?++++	2.249	0.0245	++?+-++	0.279	0.7802	????+??
3	ABHD5	4	MISSLOF	TRUE	0.01	40 (1)	24 (0)	1.11 [0.62-1.97]	0.73117	1.08 [0.6-1.95]	0.79665	49112 [0-2.2567E+172]	0.38201	0.226	0.8216	-+	0.117	0.9069	-+	0.87	0.3845	+?	-0.075	0.9403	++?--?+	-0.019	0.9847	++?--?+	0.779	0.436	???+???
3	ABHD5	7	MISSLOF	FALSE	0.01	76 (2)	30 (0)	1.38 [0.86-2.23]	0.17358	1.36 [0.83-2.22]	0.21291	141510 [0-1.3822E+200]	0.20464	0.125	0.9004	-+	0.139	0.8891	-+	1.242	0.2143	++	1.762	0.0781	++?+-++	1.73	0.08367	++?+-++	0.82	0.4125	???++??
3	ABHD6	6	MISSLOF	TRUE	0.0001	9 (0)	3 (0)	0.89 [0.21-3.85]	0.87853	0.89 [0.21-3.85]	0.87853	NA	NA	0.188	0.8505	-+	0.188	0.8505	-+	NA	NA	NA	0.034	0.9727	+-++-+?	0.034	0.9727	+-++-+?	NA	NA	NA
3	ABHD6	9	MISSLOF	FALSE	0.0001	12 (0)	4 (0)	1.1 [0.29-4.26]	0.88567	1.1 [0.29-4.26]	0.88567	NA	NA	1.135	0.2566	++	1.135	0.2566	++	NA	NA	NA	0.42	0.6742	+-++-++	0.42	0.6742	+-++-++	NA	NA	NA
3	ABHD6	5	MISSLOF	TRUE	0.001	9 (0)	3 (0)	0.89 [0.21-3.85]	0.87853	0.89 [0.21-3.85]	0.87853	NA	NA	0.188	0.8505	-+	0.188	0.8505	-+	NA	NA	NA	0.034	0.9727	+-++-+?	0.034	0.9727	+-++-+?	NA	NA	NA
3	ABHD6	8	MISSLOF	FALSE	0.001	24 (0)	4 (0)	2.2 [0.65-7.47]	0.17286	2.2 [0.65-7.47]	0.17286	NA	NA	1.526	0.127	++	1.526	0.127	++	NA	NA	NA	1.594	0.111	+-+++++	1.594	0.111	+-+++++	NA	NA	NA
3	ABHD6	4	MISSLOF	TRUE	0.01	9 (0)	3 (0)	0.89 [0.21-3.85]	0.87853	0.89 [0.21-3.85]	0.87853	NA	NA	0.188	0.8505	-+	0.188	0.8505	-+	NA	NA	NA	0.034	0.9727	+-++-+?	0.034	0.9727	+-++-+?	NA	NA	NA
3	ABHD6	7	MISSLOF	FALSE	0.01	24 (0)	4 (0)	2.2 [0.65-7.47]	0.17286	2.2 [0.65-7.47]	0.17286	NA	NA	1.526	0.127	++	1.526	0.127	++	NA	NA	NA	1.594	0.111	+-+++++	1.594	0.111	+-+++++	NA	NA	NA
19	ABHD8	6	MISSLOF	TRUE	0.0001	7 (0)	8 (0)	0.52 [0.16-1.67]	0.26817	0.52 [0.16-1.67]	0.26817	NA	NA	-1.232	0.2181	--	-1.232	0.2181	--	NA	NA	NA	-0.717	0.4735	?-?--??	-0.717	0.4735	?-?--??	NA	NA	NA
19	ABHD8	9	MISSLOF	FALSE	0.0001	13 (0)	10 (0)	0.56 [0.22-1.46]	0.24044	0.56 [0.22-1.46]	0.24044	NA	NA	-1.113	0.2657	--	-1.113	0.2657	--	NA	NA	NA	-1.288	0.1977	-----??	-1.288	0.1977	-----??	NA	NA	NA
19	ABHD8	5	MISSLOF	TRUE	0.001	12 (0)	8 (0)	0.71 [0.25-2.01]	0.52234	0.71 [0.25-2.01]	0.52234	NA	NA	-1.003	0.3158	--	-1.003	0.3158	--	NA	NA	NA	-0.047	0.9627	?-?--?+	-0.047	0.9627	?-?--?+	NA	NA	NA
19	ABHD8	8	MISSLOF	FALSE	0.001	22 (0)	11 (0)	0.71 [0.31-1.62]	0.4186	0.71 [0.31-1.62]	0.4186	NA	NA	-1.177	0.2392	--	-1.177	0.2392	--	NA	NA	NA	0.121	0.9035	----+?+	0.121	0.9035	----+?+	NA	NA	NA
19	ABHD8	4	MISSLOF	TRUE	0.01	21 (0)	16 (0)	0.66 [0.31-1.41]	0.2839	0.66 [0.31-1.41]	0.2839	NA	NA	-1.166	0.2437	--	-1.166	0.2437	--	NA	NA	NA	-0.395	0.6932	?-?--++	-0.395	0.6932	?-?--++	NA	NA	NA
19	ABHD8	7	MISSLOF	FALSE	0.01	31 (0)	19 (0)	0.67 [0.34-1.3]	0.23875	0.67 [0.34-1.3]	0.23875	NA	NA	-1.311	0.19	--	-1.311	0.19	--	NA	NA	NA	-0.251	0.8019	----+++	-0.251	0.8019	----+++	NA	NA	NA
10	ABI1	6	MISSLOF	TRUE	0.0001	6 (0)	4 (0)	0.38 [0.09-1.56]	0.19289	0.38 [0.09-1.56]	0.19289	NA	NA	-1.038	0.2991	-+	-1.038	0.2991	-+	NA	NA	NA	-1.237	0.2163	--?+-+?	-1.237	0.2163	--?+-+?	NA	NA	NA
10	ABI1	9	MISSLOF	FALSE	0.0001	11 (0)	7 (0)	0.52 [0.18-1.54]	0.24848	0.52 [0.18-1.54]	0.24848	NA	NA	-0.98	0.327	-+	-0.98	0.327	-+	NA	NA	NA	-0.562	0.5738	--?+-+?	-0.562	0.5738	--?+-+?	NA	NA	NA
10	ABI1	5	MISSLOF	TRUE	0.001	16 (0)	4 (0)	1.04 [0.31-3.46]	0.95359	1.04 [0.31-3.46]	0.95359	NA	NA	0.726	0.4678	++	0.726	0.4678	++	NA	NA	NA	-0.148	0.8823	--?+-++	-0.148	0.8823	--?+-++	NA	NA	NA
10	ABI1	8	MISSLOF	FALSE	0.001	31 (0)	11 (0)	0.84 [0.38-1.82]	0.6552	0.84 [0.38-1.82]	0.6552	NA	NA	-0.569	0.5696	-+	-0.569	0.5696	-+	NA	NA	NA	-0.172	0.8638	--++-++	-0.172	0.8638	--++-++	NA	NA	NA
10	ABI1	4	MISSLOF	TRUE	0.01	16 (0)	4 (0)	1.04 [0.31-3.46]	0.95359	1.04 [0.31-3.46]	0.95359	NA	NA	0.726	0.4678	++	0.726	0.4678	++	NA	NA	NA	-0.148	0.8823	--?+-++	-0.148	0.8823	--?+-++	NA	NA	NA
10	ABI1	7	MISSLOF	FALSE	0.01	39 (0)	15 (0)	0.85 [0.44-1.66]	0.64067	0.85 [0.44-1.66]	0.64067	NA	NA	-0.575	0.5651	-+	-0.575	0.5651	-+	NA	NA	NA	-0.245	0.8065	--++-++	-0.245	0.8065	--++-++	NA	NA	NA
2	ABI2	6	MISSLOF	TRUE	0.0001	21 (0)	4 (0)	2.56 [0.78-8.44]	0.10133	2.56 [0.78-8.44]	0.10133	NA	NA	1.673	0.09438	++	1.673	0.09438	++	NA	NA	NA	1.929	0.05372	?+-++++	1.929	0.05372	?+-++++	NA	NA	NA
2	ABI2	9	MISSLOF	FALSE	0.0001	23 (0)	4 (0)	2.7 [0.83-8.81]	0.076997	2.7 [0.83-8.81]	0.076997	NA	NA	1.879	0.06025	++	1.879	0.06025	++	NA	NA	NA	2.095	0.03618	?+-++++	2.095	0.03618	?+-++++	NA	NA	NA
2	ABI2	5	MISSLOF	TRUE	0.001	31 (0)	14 (0)	0.78 [0.38-1.61]	0.51135	0.78 [0.38-1.61]	0.51135	NA	NA	-0.528	0.5978	+-	-0.528	0.5978	+-	NA	NA	NA	-0.193	0.8473	?+--+++	-0.193	0.8473	?+--+++	NA	NA	NA
2	ABI2	8	MISSLOF	FALSE	0.001	33 (0)	14 (0)	0.82 [0.4-1.69]	0.5974	0.82 [0.4-1.69]	0.5974	NA	NA	-0.335	0.7379	+-	-0.335	0.7379	+-	NA	NA	NA	-0.035	0.9723	?+--+++	-0.035	0.9723	?+--+++	NA	NA	NA
2	ABI2	4	MISSLOF	TRUE	0.01	31 (0)	14 (0)	0.78 [0.38-1.61]	0.51135	0.78 [0.38-1.61]	0.51135	NA	NA	-0.528	0.5978	+-	-0.528	0.5978	+-	NA	NA	NA	-0.193	0.8473	?+--+++	-0.193	0.8473	?+--+++	NA	NA	NA
2	ABI2	7	MISSLOF	FALSE	0.01	33 (0)	14 (0)	0.82 [0.4-1.69]	0.5974	0.82 [0.4-1.69]	0.5974	NA	NA	-0.335	0.7379	+-	-0.335	0.7379	+-	NA	NA	NA	-0.035	0.9723	?+--+++	-0.035	0.9723	?+--+++	NA	NA	NA
17	ABI3	6	MISSLOF	TRUE	0.0001	19 (0)	3 (0)	3.07 [0.82-11.44]	0.068714	3.07 [0.82-11.44]	0.068714	NA	NA	1.584	0.1131	+-	1.584	0.1131	+-	NA	NA	NA	1.928	0.05383	?++++++	1.928	0.05383	?++++++	NA	NA	NA
17	ABI3	9	MISSLOF	FALSE	0.0001	27 (0)	7 (0)	1.54 [0.6-3.94]	0.35254	1.54 [0.6-3.94]	0.35254	NA	NA	0.807	0.4199	+-	0.807	0.4199	+-	NA	NA	NA	1.437	0.1506	+-++++-	1.437	0.1506	+-++++-	NA	NA	NA
17	ABI3	5	MISSLOF	TRUE	0.001	39 (1)	8 (0)	2.56 [1.08-6.05]	0.022022	2.57 [1.09-6.07]	0.022168	8097 [0-3.721E+171]	0.70067	2.304	0.02119	+-	2.307	0.02104	+-	0.401	0.6883	+?	2.253	0.02424	--+++++	2.265	0.02352	--+++++	0.462	0.6443	+??????
17	ABI3	8	MISSLOF	FALSE	0.001	51 (1)	15 (0)	1.43 [0.73-2.81]	0.29327	1.43 [0.72-2.82]	0.30017	8097 [0-3.721E+171]	0.70067	0.902	0.3669	+-	0.892	0.3723	+-	0.401	0.6883	+?	1.735	0.08279	+-++++-	1.316	0.1881	--++++-	0.462	0.6443	+??????
17	ABI3	4	MISSLOF	TRUE	0.01	52 (1)	18 (0)	1.82 [0.98-3.38]	0.051153	1.82 [0.98-3.39]	0.051915	8097 [0-3.721E+171]	0.70067	1.765	0.07753	+-	1.761	0.07822	+-	0.401	0.6883	+?	1.937	0.05279	-++++++	1.948	0.05137	-++++++	0.462	0.6443	+??????
17	ABI3	7	MISSLOF	FALSE	0.01	64 (1)	25 (0)	1.33 [0.77-2.29]	0.30711	1.32 [0.76-2.29]	0.31351	8097 [0-3.721E+171]	0.70067	0.791	0.4292	+-	0.779	0.4362	+-	0.401	0.6883	+?	0.913	0.3611	+-++++-	0.495	0.6208	--++++-	0.462	0.6443	+??????
3	ABI3BP	3	LOF	-	0.0001	3 (0)	0 (0)	46799 [0-4.0544E+161]	0.33676	46799 [0-4.0544E+161]	0.33676	NA	NA	0.995	0.3196	+?	0.995	0.3196	+?	NA	NA	NA	0.866	0.3863	??+?+?+	0.866	0.3863	??+?+?+	NA	NA	NA
3	ABI3BP	2	LOF	-	0.001	6 (0)	1 (0)	2.99 [0.21-42.13]	0.38207	2.99 [0.21-42.13]	0.38207	NA	NA	0.778	0.4367	+-	0.778	0.4367	+-	NA	NA	NA	1.11	0.267	??+++?+	1.11	0.267	??+++?+	NA	NA	NA
3	ABI3BP	1	LOF	-	0.01	6 (0)	1 (0)	2.99 [0.21-42.13]	0.38207	2.99 [0.21-42.13]	0.38207	NA	NA	0.778	0.4367	+-	0.778	0.4367	+-	NA	NA	NA	1.11	0.267	??+++?+	1.11	0.267	??+++?+	NA	NA	NA
3	ABI3BP	6	MISSLOF	TRUE	0.0001	41 (0)	11 (0)	1.37 [0.64-2.94]	0.41511	1.37 [0.64-2.94]	0.41511	NA	NA	0.776	0.438	+-	0.776	0.438	+-	NA	NA	NA	0.781	0.4346	+++-++-	0.781	0.4346	+++-++-	NA	NA	NA
3	ABI3BP	9	MISSLOF	FALSE	0.0001	50 (0)	13 (0)	1.5 [0.75-3]	0.23969	1.5 [0.75-3]	0.23969	NA	NA	1.047	0.2949	+-	1.047	0.2949	+-	NA	NA	NA	0.797	0.4256	-++-++-	0.797	0.4256	-++-++-	NA	NA	NA
3	ABI3BP	5	MISSLOF	TRUE	0.001	73 (0)	24 (0)	1.1 [0.65-1.87]	0.71946	1.1 [0.65-1.87]	0.71946	NA	NA	0.566	0.5714	+-	0.566	0.5714	+-	NA	NA	NA	0.469	0.639	-+-+++-	0.469	0.639	-+-+++-	NA	NA	NA
3	ABI3BP	8	MISSLOF	FALSE	0.001	94 (0)	30 (0)	1.22 [0.76-1.95]	0.40928	1.22 [0.76-1.95]	0.40928	NA	NA	0.976	0.3292	+-	0.976	0.3292	+-	NA	NA	NA	1.2	0.2301	-+++++-	1.2	0.2301	-+++++-	NA	NA	NA
3	ABI3BP	4	MISSLOF	TRUE	0.01	227 (2)	100 (0)	0.9 [0.68-1.2]	0.48688	0.9 [0.67-1.19]	0.45176	59392 [0-2.3174E+196]	0.37947	-0.665	0.5063	--	-0.718	0.4726	--	0.872	0.383	+?	-0.515	0.6067	-----++	-0.493	0.6223	-----++	1.042	0.2973	?+??+??
3	ABI3BP	7	MISSLOF	FALSE	0.01	299 (2)	126 (0)	0.94 [0.73-1.21]	0.61385	0.93 [0.72-1.2]	0.57986	59392 [0-2.3174E+196]	0.37947	-0.56	0.5752	--	-0.607	0.5442	--	0.872	0.383	+?	-0.259	0.7953	---+-+-	-0.241	0.8099	---+-+-	1.042	0.2973	?+??+??
9	ABL1	6	MISSLOF	TRUE	0.0001	36 (0)	11 (0)	1.23 [0.56-2.7]	0.6062	1.23 [0.56-2.7]	0.6062	NA	NA	0.033	0.974	+-	0.033	0.974	+-	NA	NA	NA	0.991	0.3216	---++++	0.991	0.3216	---++++	NA	NA	NA
9	ABL1	9	MISSLOF	FALSE	0.0001	38 (0)	12 (0)	1.12 [0.53-2.39]	0.76782	1.12 [0.53-2.39]	0.76782	NA	NA	0.438	0.6617	+-	0.438	0.6617	+-	NA	NA	NA	0.879	0.3793	-+--+++	0.879	0.3793	-+--+++	NA	NA	NA
9	ABL1	5	MISSLOF	TRUE	0.001	55 (0)	19 (0)	0.91 [0.5-1.68]	0.76987	0.91 [0.5-1.68]	0.76987	NA	NA	-0.073	0.9418	+-	-0.073	0.9418	+-	NA	NA	NA	0.436	0.6631	--+-+++	0.436	0.6631	--+-+++	NA	NA	NA
9	ABL1	8	MISSLOF	FALSE	0.001	66 (0)	29 (0)	0.71 [0.43-1.19]	0.20301	0.71 [0.43-1.19]	0.20301	NA	NA	-1.011	0.3121	--	-1.011	0.3121	--	NA	NA	NA	-0.509	0.6109	--+-+++	-0.509	0.6109	--+-+++	NA	NA	NA
9	ABL1	4	MISSLOF	TRUE	0.01	101 (0)	52 (0)	0.75 [0.51-1.11]	0.15318	0.75 [0.51-1.11]	0.15318	NA	NA	-1.152	0.2494	--	-1.152	0.2494	--	NA	NA	NA	-1.118	0.2636	--+---+	-1.118	0.2636	--+---+	NA	NA	NA
9	ABL1	7	MISSLOF	FALSE	0.01	132 (1)	68 (0)	0.72 [0.51-1.01]	0.056728	0.7 [0.5-0.99]	0.045463	53718 [0-2.4684E+172]	0.36456	-1.55	0.1212	--	-1.636	0.1018	--	1.106	0.2689	?+	-1.475	0.1402	--+---+	-1.537	0.1244	--+---+	0.758	0.4482	????+??
1	ABL2	3	LOF	-	0.0001	6 (0)	1 (0)	2.47 [0.15-40.12]	0.50167	2.47 [0.15-40.12]	0.50167	NA	NA	0.617	0.5373	++	0.617	0.5373	++	NA	NA	NA	0.126	0.8995	+?++-+?	0.126	0.8995	+?++-+?	NA	NA	NA
1	ABL2	2	LOF	-	0.001	9 (0)	1 (0)	4.14 [0.35-48.36]	0.20436	4.14 [0.35-48.36]	0.20436	NA	NA	1.057	0.2906	++	1.057	0.2906	++	NA	NA	NA	0.878	0.3801	++++-+?	0.878	0.3801	++++-+?	NA	NA	NA
1	ABL2	1	LOF	-	0.01	9 (0)	1 (0)	4.14 [0.35-48.36]	0.20436	4.14 [0.35-48.36]	0.20436	NA	NA	1.057	0.2906	++	1.057	0.2906	++	NA	NA	NA	0.878	0.3801	++++-+?	0.878	0.3801	++++-+?	NA	NA	NA
1	ABL2	6	MISSLOF	TRUE	0.0001	18 (0)	7 (0)	0.83 [0.29-2.37]	0.73448	0.83 [0.29-2.37]	0.73448	NA	NA	-0.244	0.807	-+	-0.244	0.807	-+	NA	NA	NA	-1.274	0.2025	--++--+	-1.274	0.2025	--++--+	NA	NA	NA
1	ABL2	9	MISSLOF	FALSE	0.0001	45 (0)	12 (0)	1.34 [0.65-2.79]	0.41998	1.34 [0.65-2.79]	0.41998	NA	NA	0.723	0.4697	++	0.723	0.4697	++	NA	NA	NA	1.057	0.2905	+-+++-+	1.057	0.2905	+-+++-+	NA	NA	NA
1	ABL2	5	MISSLOF	TRUE	0.001	33 (0)	12 (0)	0.7 [0.32-1.55]	0.39263	0.7 [0.32-1.55]	0.39263	NA	NA	0.716	0.474	+-	0.716	0.474	+-	NA	NA	NA	-1.082	0.2795	---+---	-1.082	0.2795	---+---	NA	NA	NA
1	ABL2	8	MISSLOF	FALSE	0.001	60 (0)	19 (0)	0.98 [0.53-1.79]	0.93747	0.98 [0.53-1.79]	0.93747	NA	NA	0.778	0.4368	++	0.778	0.4368	++	NA	NA	NA	-0.004	0.9964	---++--	-0.004	0.9964	---++--	NA	NA	NA
1	ABL2	4	MISSLOF	TRUE	0.01	147 (1)	66 (1)	0.83 [0.59-1.17]	0.29383	0.83 [0.58-1.17]	0.28373	1.24 [0.03-60.82]	0.91364	-1.362	0.1733	--	-1.066	0.2864	-+	0.352	0.7252	+-	-0.842	0.3999	-+-+---	-0.891	0.3731	-+-+---	-0.149	0.8817	???-+??
1	ABL2	7	MISSLOF	FALSE	0.01	252 (2)	90 (1)	0.99 [0.74-1.32]	0.95654	0.99 [0.74-1.32]	0.93941	1.55 [0.05-52.83]	0.80414	-0.116	0.9073	+-	0.147	0.883	++	0.47	0.6382	+-	0.617	0.5375	++-+++-	-0.176	0.8606	++-+-+-	-0.149	0.8817	???-+??
10	ABLIM1	3	LOF	-	0.0001	3 (0)	0 (0)	9.56 [0.25-363]	0.081462	9.56 [0.25-363]	0.081462	NA	NA	2.207	0.02729	?+	2.207	0.02729	?+	NA	NA	NA	2.179	0.02932	???+???	2.179	0.02932	???+???	NA	NA	NA
10	ABLIM1	2	LOF	-	0.001	4 (0)	0 (0)	9.72 [0.27-348.24]	0.076164	9.72 [0.27-348.24]	0.076164	NA	NA	1.63	0.1031	++	1.63	0.1031	++	NA	NA	NA	2.259	0.02386	+??+???	2.259	0.02386	+??+???	NA	NA	NA
10	ABLIM1	1	LOF	-	0.01	14 (0)	8 (0)	1.03 [0.37-2.85]	0.95192	1.03 [0.37-2.85]	0.95192	NA	NA	-0.162	0.8717	-+	-0.162	0.8717	-+	NA	NA	NA	0.128	0.8983	++?+?-?	0.128	0.8983	++?+?-?	NA	NA	NA
10	ABLIM1	6	MISSLOF	TRUE	0.0001	34 (0)	15 (0)	1.27 [0.64-2.51]	0.49712	1.27 [0.64-2.51]	0.49712	NA	NA	0.65	0.5155	+-	0.65	0.5155	+-	NA	NA	NA	0.702	0.4827	-++-+-+	0.702	0.4827	-++-+-+	NA	NA	NA
10	ABLIM1	9	MISSLOF	FALSE	0.0001	37 (0)	16 (0)	1.34 [0.69-2.6]	0.38213	1.34 [0.69-2.6]	0.38213	NA	NA	0.416	0.6775	+-	0.416	0.6775	+-	NA	NA	NA	0.347	0.7288	--+-+-+	0.347	0.7288	--+-+-+	NA	NA	NA
10	ABLIM1	5	MISSLOF	TRUE	0.001	76 (0)	31 (0)	0.98 [0.61-1.59]	0.94062	0.98 [0.61-1.59]	0.94062	NA	NA	-0.029	0.9768	-+	-0.029	0.9768	-+	NA	NA	NA	-0.439	0.6608	+---+--	-0.439	0.6608	+---+--	NA	NA	NA
10	ABLIM1	8	MISSLOF	FALSE	0.001	93 (0)	37 (0)	1.05 [0.67-1.63]	0.84144	1.05 [0.67-1.63]	0.84144	NA	NA	0.724	0.4692	++	0.724	0.4692	++	NA	NA	NA	-0.143	0.8865	+---+--	-0.143	0.8865	+---+--	NA	NA	NA
10	ABLIM1	4	MISSLOF	TRUE	0.01	110 (1)	43 (0)	0.99 [0.66-1.49]	0.95626	0.98 [0.65-1.48]	0.93026	19080 [0-8.768E+171]	0.56449	-0.057	0.9543	-+	-0.103	0.9183	-+	0.645	0.5191	+?	-0.438	0.6612	+-+-+--	-0.452	0.6515	+-+-+--	0.44	0.6599	??+????
10	ABLIM1	7	MISSLOF	FALSE	0.01	127 (1)	49 (0)	1.04 [0.71-1.52]	0.85571	1.03 [0.7-1.52]	0.87839	19080 [0-8.768E+171]	0.56449	0.695	0.487	++	0.735	0.4625	++	0.645	0.5191	+?	-0.308	0.7579	+-+-+--	-0.322	0.7477	+-+-+--	0.44	0.6599	??+????
4	ABLIM2	3	LOF	-	0.0001	3 (0)	1 (0)	2.1 [0.2-21.57]	0.51468	2.1 [0.2-21.57]	0.51468	NA	NA	0.795	0.4264	+-	0.795	0.4264	+-	NA	NA	NA	1.137	0.2554	??++???	1.137	0.2554	??++???	NA	NA	NA
4	ABLIM2	2	LOF	-	0.001	3 (0)	1 (0)	2.1 [0.2-21.57]	0.51468	2.1 [0.2-21.57]	0.51468	NA	NA	0.795	0.4264	+-	0.795	0.4264	+-	NA	NA	NA	1.137	0.2554	??++???	1.137	0.2554	??++???	NA	NA	NA
4	ABLIM2	1	LOF	-	0.01	3 (0)	1 (0)	2.1 [0.2-21.57]	0.51468	2.1 [0.2-21.57]	0.51468	NA	NA	0.795	0.4264	+-	0.795	0.4264	+-	NA	NA	NA	1.137	0.2554	??++???	1.137	0.2554	??++???	NA	NA	NA
4	ABLIM2	6	MISSLOF	TRUE	0.0001	50 (0)	20 (0)	0.91 [0.49-1.67]	0.75445	0.91 [0.49-1.67]	0.75445	NA	NA	-0.006	0.9956	+-	-0.006	0.9956	+-	NA	NA	NA	-0.149	0.8817	-----++	-0.149	0.8817	-----++	NA	NA	NA
4	ABLIM2	9	MISSLOF	FALSE	0.0001	52 (0)	25 (0)	0.76 [0.43-1.33]	0.34517	0.76 [0.43-1.33]	0.34517	NA	NA	-0.695	0.4868	--	-0.695	0.4868	--	NA	NA	NA	-0.664	0.5066	-----++	-0.664	0.5066	-----++	NA	NA	NA
4	ABLIM2	5	MISSLOF	TRUE	0.001	83 (0)	42 (0)	0.8 [0.51-1.25]	0.32893	0.8 [0.51-1.25]	0.32893	NA	NA	-0.915	0.3602	--	-0.915	0.3602	--	NA	NA	NA	-0.666	0.5056	--+--++	-0.666	0.5056	--+--++	NA	NA	NA
4	ABLIM2	8	MISSLOF	FALSE	0.001	92 (0)	50 (0)	0.71 [0.47-1.08]	0.11213	0.71 [0.47-1.08]	0.11213	NA	NA	-1.548	0.1216	--	-1.548	0.1216	--	NA	NA	NA	-1.268	0.2049	--+--++	-1.268	0.2049	--+--++	NA	NA	NA
4	ABLIM2	4	MISSLOF	TRUE	0.01	83 (0)	42 (0)	0.8 [0.51-1.25]	0.32893	0.8 [0.51-1.25]	0.32893	NA	NA	-0.915	0.3602	--	-0.915	0.3602	--	NA	NA	NA	-0.666	0.5056	--+--++	-0.666	0.5056	--+--++	NA	NA	NA
4	ABLIM2	7	MISSLOF	FALSE	0.01	92 (0)	50 (0)	0.71 [0.47-1.08]	0.11213	0.71 [0.47-1.08]	0.11213	NA	NA	-1.548	0.1216	--	-1.548	0.1216	--	NA	NA	NA	-1.268	0.2049	--+--++	-1.268	0.2049	--+--++	NA	NA	NA
5	ABLIM3	6	MISSLOF	TRUE	0.0001	50 (0)	13 (0)	1.75 [0.85-3.59]	0.11777	1.75 [0.85-3.59]	0.11777	NA	NA	1.443	0.1491	++	1.443	0.1491	++	NA	NA	NA	1.638	0.1015	-++++?+	1.638	0.1015	-++++?+	NA	NA	NA
5	ABLIM3	9	MISSLOF	FALSE	0.0001	53 (0)	14 (0)	1.67 [0.83-3.34]	0.13611	1.67 [0.83-3.34]	0.13611	NA	NA	1.391	0.1643	++	1.391	0.1643	++	NA	NA	NA	1.616	0.1061	-++++?+	1.616	0.1061	-++++?+	NA	NA	NA
5	ABLIM3	5	MISSLOF	TRUE	0.001	68 (0)	20 (0)	1.49 [0.82-2.7]	0.17666	1.49 [0.82-2.7]	0.17666	NA	NA	1.159	0.2466	++	1.159	0.2466	++	NA	NA	NA	1.561	0.1186	-++++++	1.561	0.1186	-++++++	NA	NA	NA
5	ABLIM3	8	MISSLOF	FALSE	0.001	83 (0)	23 (0)	1.57 [0.9-2.73]	0.10226	1.57 [0.9-2.73]	0.10226	NA	NA	1.577	0.1147	++	1.577	0.1147	++	NA	NA	NA	1.841	0.06559	-++++++	1.841	0.06559	-++++++	NA	NA	NA
5	ABLIM3	4	MISSLOF	TRUE	0.01	141 (2)	48 (0)	1.04 [0.71-1.52]	0.84716	1.03 [0.7-1.52]	0.87588	30247 [0-7.3133E+195]	0.52018	-0.046	0.9629	+-	-0.078	0.9382	+-	0.635	0.5253	+?	0.059	0.9526	--+++-+	0.005	0.9956	--+++-+	0.818	0.4133	???+???
5	ABLIM3	7	MISSLOF	FALSE	0.01	156 (2)	51 (0)	1.09 [0.75-1.58]	0.65218	1.08 [0.74-1.58]	0.67641	30247 [0-7.3133E+195]	0.52018	0.335	0.7375	+-	0.307	0.759	+-	0.635	0.5253	+?	0.376	0.7071	--+++-+	0.319	0.7499	--+++-+	0.818	0.4133	???+???
17	ABR	3	LOF	-	0.0001	6 (0)	3 (0)	0.89 [0.19-4.21]	0.8822	0.89 [0.19-4.21]	0.8822	NA	NA	-0.345	0.7297	--	-0.345	0.7297	--	NA	NA	NA	0.314	0.7536	-+?+++-	0.314	0.7536	-+?+++-	NA	NA	NA
17	ABR	2	LOF	-	0.001	6 (0)	3 (0)	0.89 [0.19-4.21]	0.8822	0.89 [0.19-4.21]	0.8822	NA	NA	-0.345	0.7297	--	-0.345	0.7297	--	NA	NA	NA	0.314	0.7536	-+?+++-	0.314	0.7536	-+?+++-	NA	NA	NA
17	ABR	1	LOF	-	0.01	6 (0)	3 (0)	0.89 [0.19-4.21]	0.8822	0.89 [0.19-4.21]	0.8822	NA	NA	-0.345	0.7297	--	-0.345	0.7297	--	NA	NA	NA	0.314	0.7536	-+?+++-	0.314	0.7536	-+?+++-	NA	NA	NA
17	ABR	6	MISSLOF	TRUE	0.0001	18 (0)	10 (0)	0.87 [0.35-2.17]	0.77272	0.87 [0.35-2.17]	0.77272	NA	NA	-0.464	0.6425	--	-0.464	0.6425	--	NA	NA	NA	-0.035	0.9722	---+++-	-0.035	0.9722	---+++-	NA	NA	NA
17	ABR	9	MISSLOF	FALSE	0.0001	27 (0)	12 (0)	1.02 [0.46-2.28]	0.9622	1.02 [0.46-2.28]	0.9622	NA	NA	-0.118	0.9064	-+	-0.118	0.9064	-+	NA	NA	NA	-0.009	0.9932	---+++-	-0.009	0.9932	---+++-	NA	NA	NA
17	ABR	5	MISSLOF	TRUE	0.001	23 (0)	11 (0)	0.9 [0.39-2.1]	0.81313	0.9 [0.39-2.1]	0.81313	NA	NA	-0.429	0.668	--	-0.429	0.668	--	NA	NA	NA	0.183	0.8547	---+++-	0.183	0.8547	---+++-	NA	NA	NA
17	ABR	8	MISSLOF	FALSE	0.001	39 (0)	14 (0)	1.16 [0.56-2.39]	0.69272	1.16 [0.56-2.39]	0.69272	NA	NA	0.158	0.8746	++	0.158	0.8746	++	NA	NA	NA	0.482	0.6298	---+++-	0.482	0.6298	---+++-	NA	NA	NA
17	ABR	4	MISSLOF	TRUE	0.01	61 (1)	33 (0)	0.91 [0.56-1.49]	0.71767	0.89 [0.54-1.47]	0.65855	42856 [0-1.9693E+172]	0.40933	-0.54	0.5889	--	-0.621	0.5349	--	0.774	0.4392	+?	-0.498	0.6188	---+++-	-0.498	0.6188	---+++-	0.352	0.7249	?????+?
17	ABR	7	MISSLOF	FALSE	0.01	77 (1)	36 (0)	1.01 [0.64-1.6]	0.9667	0.99 [0.62-1.59]	0.979	42856 [0-1.9693E+172]	0.40933	-0.157	0.8756	-+	-0.226	0.8215	-+	0.774	0.4392	+?	-0.049	0.9606	---+++-	-0.049	0.9606	---+++-	0.352	0.7249	?????+?
8	ABRA	3	LOF	-	0.0001	7 (0)	0 (0)	8.99 [0.27-297.95]	0.087713	8.99 [0.27-297.95]	0.087713	NA	NA	1.673	0.09438	++	1.673	0.09438	++	NA	NA	NA	1.926	0.05407	?+?++??	1.926	0.05407	?+?++??	NA	NA	NA
8	ABRA	2	LOF	-	0.001	7 (0)	0 (0)	8.99 [0.27-297.95]	0.087713	8.99 [0.27-297.95]	0.087713	NA	NA	1.673	0.09438	++	1.673	0.09438	++	NA	NA	NA	1.926	0.05407	?+?++??	1.926	0.05407	?+?++??	NA	NA	NA
8	ABRA	1	LOF	-	0.01	7 (0)	0 (0)	8.99 [0.27-297.95]	0.087713	8.99 [0.27-297.95]	0.087713	NA	NA	1.673	0.09438	++	1.673	0.09438	++	NA	NA	NA	1.926	0.05407	?+?++??	1.926	0.05407	?+?++??	NA	NA	NA
8	ABRA	6	MISSLOF	TRUE	0.0001	10 (0)	1 (0)	4.2 [0.46-38.12]	0.14127	4.2 [0.46-38.12]	0.14127	NA	NA	1.409	0.1587	++	1.409	0.1587	++	NA	NA	NA	1.445	0.1485	++?++??	1.445	0.1485	++?++??	NA	NA	NA
8	ABRA	9	MISSLOF	FALSE	0.0001	32 (0)	9 (0)	1.81 [0.75-4.34]	0.17286	1.81 [0.75-4.34]	0.17286	NA	NA	1.242	0.2142	++	1.242	0.2142	++	NA	NA	NA	0.834	0.4045	++?+-++	0.834	0.4045	++?+-++	NA	NA	NA
8	ABRA	5	MISSLOF	TRUE	0.001	10 (0)	1 (0)	4.2 [0.46-38.12]	0.14127	4.2 [0.46-38.12]	0.14127	NA	NA	1.409	0.1587	++	1.409	0.1587	++	NA	NA	NA	1.445	0.1485	++?++??	1.445	0.1485	++?++??	NA	NA	NA
8	ABRA	8	MISSLOF	FALSE	0.001	57 (0)	27 (0)	0.8 [0.46-1.4]	0.4467	0.8 [0.46-1.4]	0.4467	NA	NA	-0.784	0.4329	-+	-0.784	0.4329	-+	NA	NA	NA	-0.038	0.9697	-+---++	-0.038	0.9697	-+---++	NA	NA	NA
8	ABRA	4	MISSLOF	TRUE	0.01	10 (0)	1 (0)	4.2 [0.46-38.12]	0.14127	4.2 [0.46-38.12]	0.14127	NA	NA	1.409	0.1587	++	1.409	0.1587	++	NA	NA	NA	1.445	0.1485	++?++??	1.445	0.1485	++?++??	NA	NA	NA
8	ABRA	7	MISSLOF	FALSE	0.01	57 (0)	27 (0)	0.8 [0.46-1.4]	0.4467	0.8 [0.46-1.4]	0.4467	NA	NA	-0.784	0.4329	-+	-0.784	0.4329	-+	NA	NA	NA	-0.038	0.9697	-+---++	-0.038	0.9697	-+---++	NA	NA	NA
6	ABRACL	6	MISSLOF	TRUE	0.0001	5 (0)	1 (0)	0.76 [0.07-8.2]	0.82496	0.76 [0.07-8.2]	0.82496	NA	NA	0.812	0.4168	++	0.812	0.4168	++	NA	NA	NA	0.299	0.7647	+??+-++	0.299	0.7647	+??+-++	NA	NA	NA
6	ABRACL	9	MISSLOF	FALSE	0.0001	5 (0)	1 (0)	0.76 [0.07-8.2]	0.82496	0.76 [0.07-8.2]	0.82496	NA	NA	0.812	0.4168	++	0.812	0.4168	++	NA	NA	NA	0.299	0.7647	+??+-++	0.299	0.7647	+??+-++	NA	NA	NA
6	ABRACL	5	MISSLOF	TRUE	0.001	6 (0)	2 (0)	0.51 [0.09-2.93]	0.46917	0.51 [0.09-2.93]	0.46917	NA	NA	0.678	0.4978	++	0.678	0.4978	++	NA	NA	NA	-0.028	0.9779	+??+-++	-0.028	0.9779	+??+-++	NA	NA	NA
6	ABRACL	8	MISSLOF	FALSE	0.001	6 (0)	2 (0)	0.51 [0.09-2.93]	0.46917	0.51 [0.09-2.93]	0.46917	NA	NA	0.678	0.4978	++	0.678	0.4978	++	NA	NA	NA	-0.028	0.9779	+??+-++	-0.028	0.9779	+??+-++	NA	NA	NA
6	ABRACL	4	MISSLOF	TRUE	0.01	6 (0)	2 (0)	0.51 [0.09-2.93]	0.46917	0.51 [0.09-2.93]	0.46917	NA	NA	0.678	0.4978	++	0.678	0.4978	++	NA	NA	NA	-0.028	0.9779	+??+-++	-0.028	0.9779	+??+-++	NA	NA	NA
6	ABRACL	7	MISSLOF	FALSE	0.01	6 (0)	2 (0)	0.51 [0.09-2.93]	0.46917	0.51 [0.09-2.93]	0.46917	NA	NA	0.678	0.4978	++	0.678	0.4978	++	NA	NA	NA	-0.028	0.9779	+??+-++	-0.028	0.9779	+??+-++	NA	NA	NA
6	ABT1	3	LOF	-	0.0001	3 (0)	0 (0)	44457 [0-2.3713E+159]	0.34251	44457 [0-2.3713E+159]	0.34251	NA	NA	0.973	0.3305	+?	0.973	0.3305	+?	NA	NA	NA	0.79	0.4295	???++??	0.79	0.4295	???++??	NA	NA	NA
6	ABT1	2	LOF	-	0.001	3 (0)	0 (0)	44457 [0-2.3713E+159]	0.34251	44457 [0-2.3713E+159]	0.34251	NA	NA	0.973	0.3305	+?	0.973	0.3305	+?	NA	NA	NA	0.79	0.4295	???++??	0.79	0.4295	???++??	NA	NA	NA
6	ABT1	1	LOF	-	0.01	3 (0)	0 (0)	44457 [0-2.3713E+159]	0.34251	44457 [0-2.3713E+159]	0.34251	NA	NA	0.973	0.3305	+?	0.973	0.3305	+?	NA	NA	NA	0.79	0.4295	???++??	0.79	0.4295	???++??	NA	NA	NA
6	ABT1	6	MISSLOF	TRUE	0.0001	12 (0)	5 (0)	0.69 [0.2-2.39]	0.5633	0.69 [0.2-2.39]	0.5633	NA	NA	-0.132	0.8953	+-	-0.132	0.8953	+-	NA	NA	NA	-0.193	0.8472	++---?+	-0.193	0.8472	++---?+	NA	NA	NA
6	ABT1	9	MISSLOF	FALSE	0.0001	14 (0)	6 (0)	0.65 [0.21-2.01]	0.4616	0.65 [0.21-2.01]	0.4616	NA	NA	0.034	0.9729	+-	0.034	0.9729	+-	NA	NA	NA	-0.403	0.6868	-+---?+	-0.403	0.6868	-+---?+	NA	NA	NA
6	ABT1	5	MISSLOF	TRUE	0.001	12 (0)	7 (0)	0.48 [0.16-1.44]	0.19874	0.48 [0.16-1.44]	0.19874	NA	NA	-1.12	0.2626	--	-1.12	0.2626	--	NA	NA	NA	-0.691	0.4897	-+---?+	-0.691	0.4897	-+---?+	NA	NA	NA
6	ABT1	8	MISSLOF	FALSE	0.001	14 (0)	8 (0)	0.48 [0.17-1.33]	0.16619	0.48 [0.17-1.33]	0.16619	NA	NA	-1.208	0.2271	--	-1.208	0.2271	--	NA	NA	NA	-0.707	0.4795	-+---?+	-0.707	0.4795	-+---?+	NA	NA	NA
6	ABT1	4	MISSLOF	TRUE	0.01	69 (1)	25 (0)	0.72 [0.42-1.23]	0.23733	0.72 [0.42-1.23]	0.23368	2253.9 [0-1.0357E+171]	0.83712	1.734	0.08294	++	1.746	0.08081	++	0.224	0.8227	+?	-0.705	0.4811	---+--+	-0.725	0.4683	---+--+	0.238	0.812	?????+?
6	ABT1	7	MISSLOF	FALSE	0.01	71 (1)	26 (0)	0.71 [0.42-1.2]	0.20756	0.71 [0.41-1.2]	0.20422	2253.9 [0-1.0357E+171]	0.83712	1.791	0.07322	++	1.803	0.07131	++	0.224	0.8227	+?	-0.735	0.4624	---+--+	-0.756	0.4499	---+--+	0.238	0.812	?????+?
3	ABTB1	3	LOF	-	0.0001	4 (0)	2 (0)	1.03 [0.16-6.79]	0.97199	1.03 [0.16-6.79]	0.97199	NA	NA	0.153	0.8786	-+	0.153	0.8786	-+	NA	NA	NA	-0.099	0.9209	?+?+-??	-0.099	0.9209	?+?+-??	NA	NA	NA
3	ABTB1	2	LOF	-	0.001	4 (0)	2 (0)	1.03 [0.16-6.79]	0.97199	1.03 [0.16-6.79]	0.97199	NA	NA	0.153	0.8786	-+	0.153	0.8786	-+	NA	NA	NA	-0.099	0.9209	?+?+-??	-0.099	0.9209	?+?+-??	NA	NA	NA
3	ABTB1	1	LOF	-	0.01	23 (0)	15 (0)	0.68 [0.33-1.4]	0.29889	0.68 [0.33-1.4]	0.29889	NA	NA	-0.959	0.3377	-+	-0.959	0.3377	-+	NA	NA	NA	-1.069	0.2852	?+?--?+	-1.069	0.2852	?+?--?+	NA	NA	NA
3	ABTB1	6	MISSLOF	TRUE	0.0001	10 (0)	3 (0)	1.63 [0.41-6.59]	0.47696	1.63 [0.41-6.59]	0.47696	NA	NA	0.321	0.7483	-+	0.321	0.7483	-+	NA	NA	NA	0.335	0.7373	+-++-??	0.335	0.7373	+-++-??	NA	NA	NA
3	ABTB1	9	MISSLOF	FALSE	0.0001	25 (0)	8 (0)	0.93 [0.39-2.21]	0.86757	0.93 [0.39-2.21]	0.86757	NA	NA	-0.044	0.9651	-+	-0.044	0.9651	-+	NA	NA	NA	-0.007	0.9948	+-+++-+	-0.007	0.9948	+-+++-+	NA	NA	NA
3	ABTB1	5	MISSLOF	TRUE	0.001	11 (0)	8 (0)	0.81 [0.27-2.4]	0.7055	0.81 [0.27-2.4]	0.7055	NA	NA	-0.237	0.8126	-+	-0.237	0.8126	-+	NA	NA	NA	-0.681	0.4958	+-+--??	-0.681	0.4958	+-+--??	NA	NA	NA
3	ABTB1	8	MISSLOF	FALSE	0.001	38 (0)	17 (0)	0.8 [0.41-1.56]	0.52144	0.8 [0.41-1.56]	0.52144	NA	NA	-0.26	0.7949	-+	-0.26	0.7949	-+	NA	NA	NA	-1.292	0.1963	+-+-+-+	-1.292	0.1963	+-+-+-+	NA	NA	NA
3	ABTB1	4	MISSLOF	TRUE	0.01	30 (0)	21 (0)	0.69 [0.36-1.3]	0.2505	0.69 [0.36-1.3]	0.2505	NA	NA	-1.272	0.2033	-+	-1.272	0.2033	-+	NA	NA	NA	-1	0.3172	+-+--?+	-1	0.3172	+-+--?+	NA	NA	NA
3	ABTB1	7	MISSLOF	FALSE	0.01	67 (0)	37 (0)	0.72 [0.45-1.16]	0.18144	0.72 [0.45-1.16]	0.18144	NA	NA	-1.314	0.189	-+	-1.314	0.189	-+	NA	NA	NA	-1.744	0.08121	+-+---+	-1.744	0.08121	+-+---+	NA	NA	NA
11	ABTB2	3	LOF	-	0.0001	3 (0)	0 (0)	68961 [0-5.465E+161]	0.25178	68961 [0-5.465E+161]	0.25178	NA	NA	1.09	0.2759	+?	1.09	0.2759	+?	NA	NA	NA	0.562	0.5741	???+?+?	0.562	0.5741	???+?+?	NA	NA	NA
11	ABTB2	2	LOF	-	0.001	4 (0)	1 (0)	1.28 [0.13-12.72]	0.8298	1.28 [0.13-12.72]	0.8298	NA	NA	0.473	0.6363	+-	0.473	0.6363	+-	NA	NA	NA	-0.271	0.7865	+??-?+?	-0.271	0.7865	+??-?+?	NA	NA	NA
11	ABTB2	1	LOF	-	0.01	4 (0)	1 (0)	1.28 [0.13-12.72]	0.8298	1.28 [0.13-12.72]	0.8298	NA	NA	0.473	0.6363	+-	0.473	0.6363	+-	NA	NA	NA	-0.271	0.7865	+??-?+?	-0.271	0.7865	+??-?+?	NA	NA	NA
11	ABTB2	6	MISSLOF	TRUE	0.0001	47 (0)	22 (0)	0.75 [0.42-1.35]	0.34673	0.75 [0.42-1.35]	0.34673	NA	NA	-0.931	0.3519	--	-0.931	0.3519	--	NA	NA	NA	-1.293	0.1961	----+--	-1.293	0.1961	----+--	NA	NA	NA
11	ABTB2	9	MISSLOF	FALSE	0.0001	52 (0)	23 (0)	0.83 [0.47-1.47]	0.53123	0.83 [0.47-1.47]	0.53123	NA	NA	0.099	0.9214	+-	0.099	0.9214	+-	NA	NA	NA	-1.073	0.2833	----+--	-1.073	0.2833	----+--	NA	NA	NA
11	ABTB2	5	MISSLOF	TRUE	0.001	81 (1)	35 (0)	0.83 [0.53-1.33]	0.44751	0.83 [0.52-1.32]	0.43075	10810 [0-4.9674E+171]	0.65875	0.148	0.8824	+-	0.174	0.8621	+-	0.431	0.6663	+?	-1.074	0.2829	+---++-	-1.077	0.2816	+---++-	0.247	0.8047	?????+?
11	ABTB2	8	MISSLOF	FALSE	0.001	85 (1)	36 (0)	0.85 [0.54-1.34]	0.47964	0.84 [0.53-1.33]	0.4628	10810 [0-4.9674E+171]	0.65875	-0.009	0.9931	+-	0.016	0.9876	+-	0.431	0.6663	+?	-1.111	0.2668	+---++-	-1.114	0.2655	+---++-	0.247	0.8047	?????+?
11	ABTB2	4	MISSLOF	TRUE	0.01	127 (1)	50 (0)	0.83 [0.57-1.23]	0.3601	0.83 [0.56-1.22]	0.34801	10810 [0-4.9674E+171]	0.65875	-0.151	0.88	+-	-0.131	0.8956	+-	0.431	0.6663	+?	-0.885	0.3762	+---++-	-0.892	0.3722	+---++-	0.247	0.8047	?????+?
11	ABTB2	7	MISSLOF	FALSE	0.01	185 (2)	62 (0)	0.83 [0.59-1.18]	0.29788	0.82 [0.58-1.17]	0.27801	30967 [0-1.4325E+199]	0.52056	0.052	0.9585	+-	0.095	0.9246	+-	0.678	0.498	+?	-1.002	0.3162	+---++-	-1.007	0.3141	+---++-	0.247	0.8047	?????+?
X	AC002365.1	3	LOF	-	0.0001	2 (1)	1 (0)	0.23 [0.02-2.12]	0.28025	0.07 [0-4.17]	0.18199	1111.1 [0-5.1066E+170]	0.88495	-1.14	0.2542	-?	-1.384	0.1664	-?	0.125	0.9008	+?	-1.564	0.1177	?+?-???	-1.564	0.1177	?+?-???	0.195	0.8457	?+?????
X	AC002365.1	2	LOF	-	0.001	2 (1)	1 (0)	0.23 [0.02-2.12]	0.28025	0.07 [0-4.17]	0.18199	1111.1 [0-5.1066E+170]	0.88495	-1.14	0.2542	-?	-1.384	0.1664	-?	0.125	0.9008	+?	-1.564	0.1177	?+?-???	-1.564	0.1177	?+?-???	0.195	0.8457	?+?????
X	AC002365.1	1	LOF	-	0.01	2 (1)	1 (0)	0.23 [0.02-2.12]	0.28025	0.07 [0-4.17]	0.18199	1111.1 [0-5.1066E+170]	0.88495	-1.14	0.2542	-?	-1.384	0.1664	-?	0.125	0.9008	+?	-1.564	0.1177	?+?-???	-1.564	0.1177	?+?-???	0.195	0.8457	?+?????
X	AC002365.1	6	MISSLOF	TRUE	0.0001	6 (2)	3 (0)	0.61 [0.14-2.6]	0.52065	0.51 [0.09-2.8]	0.4364	10008 [0-1.3946E+187]	0.69443	-0.813	0.4161	--	-0.998	0.3181	--	0.385	0.7002	+?	-0.689	0.4908	?+?-?+?	-0.689	0.4908	?+?-?+?	0.237	0.8129	?+???+?
X	AC002365.1	9	MISSLOF	FALSE	0.0001	14 (5)	3 (0)	1.41 [0.38-5.23]	0.58965	1.27 [0.28-5.88]	0.7556	74614 [0-1.7722E+192]	0.30679	0.633	0.5268	++	0.418	0.6761	++	0.996	0.3191	++	1.181	0.2378	?+?++++	0.282	0.778	?+?-+++	0.719	0.4721	?+?+?+?
X	AC002365.1	5	MISSLOF	TRUE	0.001	6 (2)	3 (0)	0.61 [0.14-2.6]	0.52065	0.51 [0.09-2.8]	0.4364	10008 [0-1.3946E+187]	0.69443	-0.813	0.4161	--	-0.998	0.3181	--	0.385	0.7002	+?	-0.689	0.4908	?+?-?+?	-0.689	0.4908	?+?-?+?	0.237	0.8129	?+???+?
X	AC002365.1	8	MISSLOF	FALSE	0.001	14 (5)	3 (0)	1.41 [0.38-5.23]	0.58965	1.27 [0.28-5.88]	0.7556	74614 [0-1.7722E+192]	0.30679	0.633	0.5268	++	0.418	0.6761	++	0.996	0.3191	++	1.181	0.2378	?+?++++	0.282	0.778	?+?-+++	0.719	0.4721	?+?+?+?
X	AC002365.1	4	MISSLOF	TRUE	0.01	6 (2)	3 (0)	0.61 [0.14-2.6]	0.52065	0.51 [0.09-2.8]	0.4364	10008 [0-1.3946E+187]	0.69443	-0.813	0.4161	--	-0.998	0.3181	--	0.385	0.7002	+?	-0.689	0.4908	?+?-?+?	-0.689	0.4908	?+?-?+?	0.237	0.8129	?+???+?
X	AC002365.1	7	MISSLOF	FALSE	0.01	125 (42)	49 (11)	0.88 [0.64-1.21]	0.44894	0.88 [0.55-1.39]	0.58248	0.71 [0.33-1.49]	0.37119	-0.5	0.6169	-+	-0.771	0.441	--	1.203	0.2288	++	-0.392	0.6951	?-+--++	-0.317	0.751	?-+--++	0.535	0.5928	?+++-++
16	AC004381.6	3	LOF	-	0.0001	6 (0)	0 (0)	119490 [0-5.0344E+178]	0.17026	119490 [0-5.0344E+178]	0.17026	NA	NA	1.326	0.1848	++	1.326	0.1848	++	NA	NA	NA	1.465	0.1428	???+?+?	1.465	0.1428	???+?+?	NA	NA	NA
16	AC004381.6	2	LOF	-	0.001	11 (0)	1 (0)	4.05 [0.47-35.3]	0.14449	4.05 [0.47-35.3]	0.14449	NA	NA	1.292	0.1964	++	1.292	0.1964	++	NA	NA	NA	1.593	0.1112	++?+?+?	1.593	0.1112	++?+?+?	NA	NA	NA
16	AC004381.6	1	LOF	-	0.01	11 (0)	1 (0)	4.05 [0.47-35.3]	0.14449	4.05 [0.47-35.3]	0.14449	NA	NA	1.292	0.1964	++	1.292	0.1964	++	NA	NA	NA	1.593	0.1112	++?+?+?	1.593	0.1112	++?+?+?	NA	NA	NA
16	AC004381.6	6	MISSLOF	TRUE	0.0001	29 (1)	9 (0)	1.24 [0.52-2.97]	0.62651	1.22 [0.5-2.98]	0.6514	12276 [0-5.6416E+171]	0.63907	0.742	0.458	+-	0.724	0.4689	+-	0.418	0.6761	+?	0.658	0.5104	-+-+-+-	0.658	0.5104	-+-+-+-	0.458	0.6468	?+?????
16	AC004381.6	9	MISSLOF	FALSE	0.0001	40 (1)	10 (0)	1.64 [0.74-3.64]	0.2115	1.63 [0.73-3.65]	0.21931	12276 [0-5.6416E+171]	0.63907	1.526	0.127	+-	1.517	0.1293	+-	0.418	0.6761	+?	1.042	0.2975	-+-+-+-	1.042	0.2975	-+-+-+-	0.458	0.6468	?+?????
16	AC004381.6	5	MISSLOF	TRUE	0.001	58 (1)	26 (0)	0.98 [0.57-1.68]	0.93948	0.97 [0.56-1.67]	0.91584	12276 [0-5.6416E+171]	0.63907	0.086	0.9317	+-	0.072	0.9428	+-	0.418	0.6761	+?	0.713	0.4756	++-+++-	0.713	0.4756	++-+++-	0.458	0.6468	?+?????
16	AC004381.6	8	MISSLOF	FALSE	0.001	77 (1)	31 (1)	1.16 [0.72-1.86]	0.54037	1.19 [0.73-1.94]	0.48471	0.43 [0.01-13.02]	0.62999	0.652	0.5141	+-	0.808	0.4192	+-	-0.623	0.5335	-?	1.227	0.2198	++-+++-	1.273	0.2031	++-+++-	-0.507	0.612	?+????-
16	AC004381.6	4	MISSLOF	TRUE	0.01	58 (1)	26 (0)	0.98 [0.57-1.68]	0.93948	0.97 [0.56-1.67]	0.91584	12276 [0-5.6416E+171]	0.63907	0.086	0.9317	+-	0.072	0.9428	+-	0.418	0.6761	+?	0.713	0.4756	++-+++-	0.713	0.4756	++-+++-	0.458	0.6468	?+?????
16	AC004381.6	7	MISSLOF	FALSE	0.01	77 (1)	31 (1)	1.16 [0.72-1.86]	0.54037	1.19 [0.73-1.94]	0.48471	0.43 [0.01-13.02]	0.62999	0.652	0.5141	+-	0.808	0.4192	+-	-0.623	0.5335	-?	1.227	0.2198	++-+++-	1.273	0.2031	++-+++-	-0.507	0.612	?+????-
17	AC005358.1	6	MISSLOF	TRUE	0.0001	26 (0)	9 (0)	1.29 [0.51-3.27]	0.58189	1.29 [0.51-3.27]	0.58189	NA	NA	0.428	0.6686	++	0.428	0.6686	++	NA	NA	NA	0.211	0.8327	+++--?+	0.211	0.8327	+++--?+	NA	NA	NA
17	AC005358.1	9	MISSLOF	FALSE	0.0001	30 (0)	11 (0)	1.15 [0.5-2.65]	0.73885	1.15 [0.5-2.65]	0.73885	NA	NA	0.103	0.9182	-+	0.103	0.9182	-+	NA	NA	NA	0.131	0.896	+++--?+	0.131	0.896	+++--?+	NA	NA	NA
17	AC005358.1	5	MISSLOF	TRUE	0.001	62 (0)	14 (0)	1.83 [0.92-3.62]	0.072731	1.83 [0.92-3.62]	0.072731	NA	NA	1.61	0.1073	++	1.61	0.1073	++	NA	NA	NA	2.168	0.03017	-+-++++	2.168	0.03017	-+-++++	NA	NA	NA
17	AC005358.1	8	MISSLOF	FALSE	0.001	84 (0)	22 (0)	1.58 [0.91-2.74]	0.092681	1.58 [0.91-2.74]	0.092681	NA	NA	1.517	0.1293	++	1.517	0.1293	++	NA	NA	NA	1.712	0.08698	-+-++++	1.712	0.08698	-+-++++	NA	NA	NA
17	AC005358.1	4	MISSLOF	TRUE	0.01	101 (0)	25 (0)	1.35 [0.81-2.25]	0.24819	1.35 [0.81-2.25]	0.24819	NA	NA	1.155	0.2481	++	1.155	0.2481	++	NA	NA	NA	1.12	0.2628	+--++++	1.12	0.2628	+--++++	NA	NA	NA
17	AC005358.1	7	MISSLOF	FALSE	0.01	123 (0)	33 (0)	1.31 [0.83-2.06]	0.23304	1.31 [0.83-2.06]	0.23304	NA	NA	1.181	0.2376	++	1.181	0.2376	++	NA	NA	NA	0.863	0.3882	+--++++	0.863	0.3882	+--++++	NA	NA	NA
19	AC012313.1	2	LOF	-	0.001	6 (0)	4 (0)	0.78 [0.18-3.38]	0.73766	0.78 [0.18-3.38]	0.73766	NA	NA	-0.515	0.6063	--	-0.515	0.6063	--	NA	NA	NA	-0.094	0.9248	?+?-+++	-0.094	0.9248	?+?-+++	NA	NA	NA
19	AC012313.1	1	LOF	-	0.01	6 (0)	4 (0)	0.78 [0.18-3.38]	0.73766	0.78 [0.18-3.38]	0.73766	NA	NA	-0.515	0.6063	--	-0.515	0.6063	--	NA	NA	NA	-0.094	0.9248	?+?-+++	-0.094	0.9248	?+?-+++	NA	NA	NA
19	AC012313.1	9	MISSLOF	FALSE	0.0001	31 (0)	7 (0)	1.81 [0.7-4.63]	0.19989	1.81 [0.7-4.63]	0.19989	NA	NA	1.128	0.2593	++	1.128	0.2593	++	NA	NA	NA	1.673	0.09436	+++++++	1.673	0.09436	+++++++	NA	NA	NA
19	AC012313.1	5	MISSLOF	TRUE	0.001	6 (0)	4 (0)	0.78 [0.18-3.38]	0.73766	0.78 [0.18-3.38]	0.73766	NA	NA	-0.515	0.6063	--	-0.515	0.6063	--	NA	NA	NA	-0.094	0.9248	?+?-+++	-0.094	0.9248	?+?-+++	NA	NA	NA
19	AC012313.1	8	MISSLOF	FALSE	0.001	55 (0)	14 (0)	1.38 [0.71-2.67]	0.33036	1.38 [0.71-2.67]	0.33036	NA	NA	1.074	0.283	++	1.074	0.283	++	NA	NA	NA	1.657	0.09757	++-++++	1.657	0.09757	++-++++	NA	NA	NA
19	AC012313.1	4	MISSLOF	TRUE	0.01	6 (0)	4 (0)	0.78 [0.18-3.38]	0.73766	0.78 [0.18-3.38]	0.73766	NA	NA	-0.515	0.6063	--	-0.515	0.6063	--	NA	NA	NA	-0.094	0.9248	?+?-+++	-0.094	0.9248	?+?-+++	NA	NA	NA
19	AC012313.1	7	MISSLOF	FALSE	0.01	96 (0)	29 (0)	1.18 [0.72-1.91]	0.50637	1.18 [0.72-1.91]	0.50637	NA	NA	0.629	0.5294	++	0.629	0.5294	++	NA	NA	NA	1.186	0.2356	+--++++	1.186	0.2356	+--++++	NA	NA	NA
3	ACAA1	2	LOF	-	0.001	3 (0)	1 (0)	0.32 [0.03-3.52]	0.39018	0.32 [0.03-3.52]	0.39018	NA	NA	-0.851	0.3949	-+	-0.851	0.3949	-+	NA	NA	NA	-0.685	0.4931	++?-???	-0.685	0.4931	++?-???	NA	NA	NA
3	ACAA1	1	LOF	-	0.01	3 (0)	1 (0)	0.32 [0.03-3.52]	0.39018	0.32 [0.03-3.52]	0.39018	NA	NA	-0.851	0.3949	-+	-0.851	0.3949	-+	NA	NA	NA	-0.685	0.4931	++?-???	-0.685	0.4931	++?-???	NA	NA	NA
3	ACAA1	6	MISSLOF	TRUE	0.0001	24 (0)	7 (0)	1.37 [0.51-3.69]	0.52216	1.37 [0.51-3.69]	0.52216	NA	NA	0.28	0.7797	+-	0.28	0.7797	+-	NA	NA	NA	0.998	0.3182	++?-+++	0.998	0.3182	++?-+++	NA	NA	NA
3	ACAA1	9	MISSLOF	FALSE	0.0001	26 (0)	7 (0)	1.41 [0.53-3.76]	0.4835	1.41 [0.53-3.76]	0.4835	NA	NA	0.345	0.7303	+-	0.345	0.7303	+-	NA	NA	NA	1.161	0.2456	++?-+++	1.161	0.2456	++?-+++	NA	NA	NA
3	ACAA1	5	MISSLOF	TRUE	0.001	45 (0)	17 (0)	1.1 [0.57-2.13]	0.76934	1.1 [0.57-2.13]	0.76934	NA	NA	-0.18	0.857	+-	-0.18	0.857	+-	NA	NA	NA	0.806	0.4201	+-?-+++	0.806	0.4201	+-?-+++	NA	NA	NA
3	ACAA1	8	MISSLOF	FALSE	0.001	47 (0)	17 (0)	1.12 [0.58-2.15]	0.73491	1.12 [0.58-2.15]	0.73491	NA	NA	-0.133	0.8938	+-	-0.133	0.8938	+-	NA	NA	NA	0.969	0.3327	+-?-+++	0.969	0.3327	+-?-+++	NA	NA	NA
3	ACAA1	4	MISSLOF	TRUE	0.01	54 (0)	20 (0)	1.17 [0.64-2.13]	0.61512	1.17 [0.64-2.13]	0.61512	NA	NA	0.532	0.5945	++	0.532	0.5945	++	NA	NA	NA	0.266	0.7904	+---+++	0.266	0.7904	+---+++	NA	NA	NA
3	ACAA1	7	MISSLOF	FALSE	0.01	56 (0)	20 (0)	1.18 [0.65-2.15]	0.5869	1.18 [0.65-2.15]	0.5869	NA	NA	0.575	0.5655	++	0.575	0.5655	++	NA	NA	NA	0.387	0.6987	+---+++	0.387	0.6987	+---+++	NA	NA	NA
18	ACAA2	3	LOF	-	0.0001	2 (0)	1 (0)	0.45 [0.03-5.93]	0.56137	0.45 [0.03-5.93]	0.56137	NA	NA	-0.196	0.8447	+-	-0.196	0.8447	+-	NA	NA	NA	-1.094	0.2738	???-+??	-1.094	0.2738	???-+??	NA	NA	NA
18	ACAA2	2	LOF	-	0.001	2 (0)	1 (0)	0.45 [0.03-5.93]	0.56137	0.45 [0.03-5.93]	0.56137	NA	NA	-0.196	0.8447	+-	-0.196	0.8447	+-	NA	NA	NA	-1.094	0.2738	???-+??	-1.094	0.2738	???-+??	NA	NA	NA
18	ACAA2	1	LOF	-	0.01	2 (0)	1 (0)	0.45 [0.03-5.93]	0.56137	0.45 [0.03-5.93]	0.56137	NA	NA	-0.196	0.8447	+-	-0.196	0.8447	+-	NA	NA	NA	-1.094	0.2738	???-+??	-1.094	0.2738	???-+??	NA	NA	NA
18	ACAA2	6	MISSLOF	TRUE	0.0001	19 (0)	9 (0)	0.69 [0.29-1.64]	0.4055	0.69 [0.29-1.64]	0.4055	NA	NA	-0.057	0.9548	+-	-0.057	0.9548	+-	NA	NA	NA	-0.308	0.7583	?++-+++	-0.308	0.7583	?++-+++	NA	NA	NA
18	ACAA2	9	MISSLOF	FALSE	0.0001	21 (0)	10 (0)	0.68 [0.3-1.55]	0.36556	0.68 [0.3-1.55]	0.36556	NA	NA	-0.323	0.7469	+-	-0.323	0.7469	+-	NA	NA	NA	-0.331	0.7408	?++-+++	-0.331	0.7408	?++-+++	NA	NA	NA
18	ACAA2	5	MISSLOF	TRUE	0.001	28 (0)	11 (0)	0.84 [0.39-1.8]	0.64895	0.84 [0.39-1.8]	0.64895	NA	NA	0.154	0.8773	+-	0.154	0.8773	+-	NA	NA	NA	0.007	0.9942	+-+-+++	0.007	0.9942	+-+-+++	NA	NA	NA
18	ACAA2	8	MISSLOF	FALSE	0.001	37 (0)	13 (0)	0.93 [0.47-1.85]	0.83537	0.93 [0.47-1.85]	0.83537	NA	NA	0.276	0.7827	+-	0.276	0.7827	+-	NA	NA	NA	0.241	0.8095	+-+-+++	0.241	0.8095	+-+-+++	NA	NA	NA
18	ACAA2	4	MISSLOF	TRUE	0.01	74 (2)	23 (0)	0.91 [0.53-1.53]	0.71204	0.87 [0.51-1.5]	0.62346	64690 [0-2.267E+173]	0.32412	-0.302	0.7626	+-	-0.383	0.7017	+-	0.904	0.3661	+?	0.099	0.9209	+-+-+++	0.099	0.9209	+-+-+++	0.746	0.4554	?????+?
18	ACAA2	7	MISSLOF	FALSE	0.01	82 (2)	25 (0)	0.94 [0.57-1.56]	0.82112	0.92 [0.55-1.53]	0.73643	64690 [0-2.267E+173]	0.32412	-0.199	0.8424	+-	-0.27	0.7871	+-	0.904	0.3661	+?	0.271	0.7861	+-+-+++	0.271	0.7861	+-+-+++	0.746	0.4554	?????+?
17	ACACA	6	MISSLOF	TRUE	0.0001	1 (0)	2 (0)	0.1 [0-3.12]	0.1501	0.1 [0-3.12]	0.1501	NA	NA	-1.367	0.1718	--	-1.367	0.1718	--	NA	NA	NA	-1.427	0.1534	???-+??	-1.427	0.1534	???-+??	NA	NA	NA
17	ACACA	9	MISSLOF	FALSE	0.0001	1 (0)	2 (0)	0.1 [0-3.12]	0.1501	0.1 [0-3.12]	0.1501	NA	NA	-1.367	0.1718	--	-1.367	0.1718	--	NA	NA	NA	-1.427	0.1534	???-+??	-1.427	0.1534	???-+??	NA	NA	NA
17	ACACA	5	MISSLOF	TRUE	0.001	1 (0)	2 (0)	0.1 [0-3.12]	0.1501	0.1 [0-3.12]	0.1501	NA	NA	-1.367	0.1718	--	-1.367	0.1718	--	NA	NA	NA	-1.427	0.1534	???-+??	-1.427	0.1534	???-+??	NA	NA	NA
17	ACACA	8	MISSLOF	FALSE	0.001	1 (0)	2 (0)	0.1 [0-3.12]	0.1501	0.1 [0-3.12]	0.1501	NA	NA	-1.367	0.1718	--	-1.367	0.1718	--	NA	NA	NA	-1.427	0.1534	???-+??	-1.427	0.1534	???-+??	NA	NA	NA
17	ACACA	4	MISSLOF	TRUE	0.01	1 (0)	2 (0)	0.1 [0-3.12]	0.1501	0.1 [0-3.12]	0.1501	NA	NA	-1.367	0.1718	--	-1.367	0.1718	--	NA	NA	NA	-1.427	0.1534	???-+??	-1.427	0.1534	???-+??	NA	NA	NA
17	ACACA	7	MISSLOF	FALSE	0.01	1 (0)	2 (0)	0.1 [0-3.12]	0.1501	0.1 [0-3.12]	0.1501	NA	NA	-1.367	0.1718	--	-1.367	0.1718	--	NA	NA	NA	-1.427	0.1534	???-+??	-1.427	0.1534	???-+??	NA	NA	NA
12	ACACB	3	LOF	-	0.0001	12 (0)	6 (0)	0.77 [0.24-2.45]	0.65708	0.77 [0.24-2.45]	0.65708	NA	NA	-0.587	0.5571	-+	-0.587	0.5571	-+	NA	NA	NA	0.011	0.9913	-+?+-??	0.011	0.9913	-+?+-??	NA	NA	NA
12	ACACB	2	LOF	-	0.001	16 (0)	6 (0)	0.84 [0.27-2.58]	0.75791	0.84 [0.27-2.58]	0.75791	NA	NA	-0.41	0.6821	-+	-0.41	0.6821	-+	NA	NA	NA	0.226	0.821	-+?+-?+	0.226	0.821	-+?+-?+	NA	NA	NA
12	ACACB	1	LOF	-	0.01	16 (0)	6 (0)	0.84 [0.27-2.58]	0.75791	0.84 [0.27-2.58]	0.75791	NA	NA	-0.41	0.6821	-+	-0.41	0.6821	-+	NA	NA	NA	0.226	0.821	-+?+-?+	0.226	0.821	-+?+-?+	NA	NA	NA
12	ACACB	6	MISSLOF	TRUE	0.0001	131 (0)	68 (0)	0.72 [0.51-1.03]	0.073145	0.72 [0.51-1.03]	0.073145	NA	NA	-1.622	0.1048	-+	-1.622	0.1048	-+	NA	NA	NA	-1.129	0.259	-+---+-	-1.129	0.259	-+---+-	NA	NA	NA
12	ACACB	9	MISSLOF	FALSE	0.0001	157 (0)	79 (0)	0.73 [0.53-1.01]	0.05944	0.73 [0.53-1.01]	0.05944	NA	NA	-1.521	0.1283	-+	-1.521	0.1283	-+	NA	NA	NA	-0.898	0.369	-+---+-	-0.898	0.369	-+---+-	NA	NA	NA
12	ACACB	5	MISSLOF	TRUE	0.001	229 (1)	93 (1)	0.84 [0.62-1.12]	0.22874	0.84 [0.63-1.13]	0.24848	0.36 [0.02-6.75]	0.50296	1.136	0.2561	++	1.1	0.2714	++	-0.11	0.9126	+-	-0.565	0.5724	-+--+++	-0.486	0.6271	-+--+++	-1.07	0.2845	???-??+
12	ACACB	8	MISSLOF	FALSE	0.001	265 (1)	107 (1)	0.83 [0.64-1.1]	0.1972	0.84 [0.64-1.11]	0.21379	0.36 [0.02-6.75]	0.50296	1.18	0.238	++	1.147	0.2515	++	-0.11	0.9126	+-	-0.493	0.6218	-+---++	-0.416	0.6772	-+---++	-1.07	0.2845	???-??+
12	ACACB	4	MISSLOF	TRUE	0.01	350 (1)	142 (2)	0.85 [0.67-1.08]	0.19522	0.86 [0.68-1.1]	0.23944	0.19 [0.02-2.32]	0.17685	1.203	0.2289	++	1.092	0.275	++	-1.332	0.1828	--	-1.124	0.2609	-+--+-+	-1.165	0.244	-+--+-+	-1.646	0.09967	???-??-
12	ACACB	7	MISSLOF	FALSE	0.01	398 (1)	165 (2)	0.84 [0.67-1.05]	0.12842	0.85 [0.68-1.06]	0.15836	0.19 [0.02-2.32]	0.17685	-1.409	0.1587	-+	-1.328	0.1842	-+	-1.332	0.1828	--	-1.108	0.268	-+--+-+	-1.153	0.249	-+--+-+	-1.646	0.09967	???-??-
12	ACAD10	3	LOF	-	0.0001	13 (0)	3 (0)	2.02 [0.51-8.05]	0.29536	2.02 [0.51-8.05]	0.29536	NA	NA	0.981	0.3268	++	0.981	0.3268	++	NA	NA	NA	1.542	0.123	+?-++??	1.542	0.123	+?-++??	NA	NA	NA
12	ACAD10	2	LOF	-	0.001	14 (0)	5 (0)	1.34 [0.43-4.22]	0.60738	1.34 [0.43-4.22]	0.60738	NA	NA	0.567	0.571	-+	0.567	0.571	-+	NA	NA	NA	1.149	0.2507	++-++??	1.149	0.2507	++-++??	NA	NA	NA
12	ACAD10	1	LOF	-	0.01	14 (0)	5 (0)	1.34 [0.43-4.22]	0.60738	1.34 [0.43-4.22]	0.60738	NA	NA	0.567	0.571	-+	0.567	0.571	-+	NA	NA	NA	1.149	0.2507	++-++??	1.149	0.2507	++-++??	NA	NA	NA
12	ACAD10	6	MISSLOF	TRUE	0.0001	57 (1)	14 (0)	1.8 [0.93-3.47]	0.069029	1.79 [0.93-3.48]	0.072718	19657 [0-9.0322E+171]	0.55887	1.791	0.07334	++	1.776	0.07565	++	0.522	0.6017	?+	1.803	0.07133	-+-++-+	1.805	0.07102	-+-++-+	0.512	0.6085	???+???
12	ACAD10	9	MISSLOF	FALSE	0.0001	78 (1)	24 (0)	1.31 [0.77-2.22]	0.30808	1.3 [0.77-2.22]	0.32239	19657 [0-9.0322E+171]	0.55887	0.979	0.3278	++	0.947	0.3435	++	0.522	0.6017	?+	0.876	0.3809	-+-++-+	0.857	0.3917	-+-++-+	0.512	0.6085	???+???
12	ACAD10	5	MISSLOF	TRUE	0.001	74 (1)	22 (0)	1.33 [0.78-2.28]	0.28461	1.33 [0.77-2.28]	0.29809	19657 [0-9.0322E+171]	0.55887	0.914	0.3606	++	0.899	0.3685	++	0.522	0.6017	?+	1.18	0.238	-+-++-+	1.167	0.2431	-+-++-+	0.512	0.6085	???+???
12	ACAD10	8	MISSLOF	FALSE	0.001	108 (1)	36 (0)	1.09 [0.71-1.69]	0.68765	1.09 [0.7-1.69]	0.71095	19657 [0-9.0322E+171]	0.55887	0.126	0.8998	++	0.099	0.9211	++	0.522	0.6017	?+	0.334	0.7384	-+-++--	0.313	0.7546	-+-++--	0.512	0.6085	???+???
12	ACAD10	4	MISSLOF	TRUE	0.01	197 (3)	47 (2)	1.36 [0.95-1.94]	0.087459	1.43 [0.99-2.07]	0.054186	0.35 [0.04-2.78]	0.33157	1.778	0.07543	++	1.971	0.04872	++	-0.881	0.3785	-+	1.454	0.1459	+--++-+	1.735	0.08277	+--++-+	-1.221	0.2222	???-?+-
12	ACAD10	7	MISSLOF	FALSE	0.01	235 (3)	64 (2)	1.18 [0.86-1.62]	0.31126	1.22 [0.88-1.69]	0.23665	0.35 [0.04-2.78]	0.33157	1.204	0.2285	++	1.054	0.2919	++	-0.881	0.3785	-+	0.771	0.441	+--++--	1.054	0.2918	+--++-+	-1.221	0.2222	???-?+-
3	ACAD11	3	LOF	-	0.0001	6 (0)	0 (0)	15.54 [0.36-679.42]	0.045867	15.54 [0.36-679.42]	0.045867	NA	NA	1.988	0.04687	++	1.988	0.04687	++	NA	NA	NA	2.21	0.02707	???++??	2.21	0.02707	???++??	NA	NA	NA
3	ACAD11	2	LOF	-	0.001	8 (0)	3 (0)	1.35 [0.29-6.22]	0.69529	1.35 [0.29-6.22]	0.69529	NA	NA	0.385	0.7	-+	0.385	0.7	-+	NA	NA	NA	1.344	0.1788	--?++??	1.344	0.1788	--?++??	NA	NA	NA
3	ACAD11	1	LOF	-	0.01	8 (0)	3 (0)	1.35 [0.29-6.22]	0.69529	1.35 [0.29-6.22]	0.69529	NA	NA	0.385	0.7	-+	0.385	0.7	-+	NA	NA	NA	1.344	0.1788	--?++??	1.344	0.1788	--?++??	NA	NA	NA
3	ACAD11	6	MISSLOF	TRUE	0.0001	43 (0)	20 (0)	1.05 [0.57-1.96]	0.8665	1.05 [0.57-1.96]	0.8665	NA	NA	0.102	0.9186	-+	0.102	0.9186	-+	NA	NA	NA	0.447	0.6551	+-++-++	0.447	0.6551	+-++-++	NA	NA	NA
3	ACAD11	9	MISSLOF	FALSE	0.0001	46 (0)	20 (0)	1.13 [0.62-2.09]	0.68364	1.13 [0.62-2.09]	0.68364	NA	NA	0.023	0.9818	-+	0.023	0.9818	-+	NA	NA	NA	0.68	0.4963	+-++-++	0.68	0.4963	+-++-++	NA	NA	NA
3	ACAD11	5	MISSLOF	TRUE	0.001	59 (0)	34 (0)	0.88 [0.53-1.46]	0.62986	0.88 [0.53-1.46]	0.62986	NA	NA	-0.406	0.6849	--	-0.406	0.6849	--	NA	NA	NA	-0.832	0.4057	--+---+	-0.832	0.4057	--+---+	NA	NA	NA
3	ACAD11	8	MISSLOF	FALSE	0.001	62 (0)	34 (0)	0.93 [0.57-1.54]	0.78466	0.93 [0.57-1.54]	0.78466	NA	NA	-0.342	0.7323	--	-0.342	0.7323	--	NA	NA	NA	-0.75	0.453	--+---+	-0.75	0.453	--+---+	NA	NA	NA
3	ACAD11	4	MISSLOF	TRUE	0.01	102 (0)	54 (0)	0.8 [0.54-1.2]	0.28188	0.8 [0.54-1.2]	0.28188	NA	NA	-1.062	0.2883	--	-1.062	0.2883	--	NA	NA	NA	-1.67	0.09489	--+----	-1.67	0.09489	--+----	NA	NA	NA
3	ACAD11	7	MISSLOF	FALSE	0.01	105 (0)	54 (0)	0.83 [0.56-1.24]	0.36506	0.83 [0.56-1.24]	0.36506	NA	NA	-0.935	0.3495	--	-0.935	0.3495	--	NA	NA	NA	-1.624	0.1044	--+----	-1.624	0.1044	--+----	NA	NA	NA
11	ACAD8	3	LOF	-	0.0001	2 (0)	1 (0)	2.32 [0.17-31.96]	0.51906	2.32 [0.17-31.96]	0.51906	NA	NA	-0.154	0.8778	-+	-0.154	0.8778	-+	NA	NA	NA	1.018	0.3088	?-?+???	1.018	0.3088	?-?+???	NA	NA	NA
11	ACAD8	2	LOF	-	0.001	2 (0)	1 (0)	2.32 [0.17-31.96]	0.51906	2.32 [0.17-31.96]	0.51906	NA	NA	-0.154	0.8778	-+	-0.154	0.8778	-+	NA	NA	NA	1.018	0.3088	?-?+???	1.018	0.3088	?-?+???	NA	NA	NA
11	ACAD8	1	LOF	-	0.01	2 (0)	1 (0)	2.32 [0.17-31.96]	0.51906	2.32 [0.17-31.96]	0.51906	NA	NA	-0.154	0.8778	-+	-0.154	0.8778	-+	NA	NA	NA	1.018	0.3088	?-?+???	1.018	0.3088	?-?+???	NA	NA	NA
11	ACAD8	6	MISSLOF	TRUE	0.0001	30 (0)	25 (0)	0.5 [0.26-0.96]	0.038813	0.5 [0.26-0.96]	0.038813	NA	NA	-1.598	0.11	--	-1.598	0.11	--	NA	NA	NA	-1.631	0.103	--?-++-	-1.631	0.103	--?-++-	NA	NA	NA
11	ACAD8	9	MISSLOF	FALSE	0.0001	32 (0)	26 (0)	0.54 [0.29-1]	0.052723	0.54 [0.29-1]	0.052723	NA	NA	-1.5	0.1336	--	-1.5	0.1336	--	NA	NA	NA	-1.542	0.1231	--?-++-	-1.542	0.1231	--?-++-	NA	NA	NA
11	ACAD8	5	MISSLOF	TRUE	0.001	39 (0)	27 (0)	0.63 [0.35-1.15]	0.13694	0.63 [0.35-1.15]	0.13694	NA	NA	-1.114	0.2654	--	-1.114	0.2654	--	NA	NA	NA	-1.213	0.225	--?-++-	-1.213	0.225	--?-++-	NA	NA	NA
11	ACAD8	8	MISSLOF	FALSE	0.001	41 (0)	28 (0)	0.66 [0.37-1.18]	0.16111	0.66 [0.37-1.18]	0.16111	NA	NA	-1.059	0.2894	--	-1.059	0.2894	--	NA	NA	NA	-1.141	0.2538	--?-++-	-1.141	0.2538	--?-++-	NA	NA	NA
11	ACAD8	4	MISSLOF	TRUE	0.01	39 (0)	27 (0)	0.63 [0.35-1.15]	0.13694	0.63 [0.35-1.15]	0.13694	NA	NA	-1.114	0.2654	--	-1.114	0.2654	--	NA	NA	NA	-1.213	0.225	--?-++-	-1.213	0.225	--?-++-	NA	NA	NA
11	ACAD8	7	MISSLOF	FALSE	0.01	73 (0)	33 (0)	0.82 [0.5-1.34]	0.42811	0.82 [0.5-1.34]	0.42811	NA	NA	-0.52	0.6027	+-	-0.52	0.6027	+-	NA	NA	NA	-0.74	0.4594	+-?-++-	-0.74	0.4594	+-?-++-	NA	NA	NA
3	ACAD9	2	LOF	-	0.001	2 (0)	1 (0)	0.82 [0.02-27.98]	0.91225	0.82 [0.02-27.98]	0.91225	NA	NA	0.142	0.8871	+-	0.142	0.8871	+-	NA	NA	NA	-0.222	0.8241	?+?-?+?	-0.222	0.8241	?+?-?+?	NA	NA	NA
3	ACAD9	1	LOF	-	0.01	2 (0)	1 (0)	0.82 [0.02-27.98]	0.91225	0.82 [0.02-27.98]	0.91225	NA	NA	0.142	0.8871	+-	0.142	0.8871	+-	NA	NA	NA	-0.222	0.8241	?+?-?+?	-0.222	0.8241	?+?-?+?	NA	NA	NA
3	ACAD9	6	MISSLOF	TRUE	0.0001	32 (1)	20 (0)	0.72 [0.39-1.34]	0.31091	0.71 [0.38-1.33]	0.28655	12453 [0-5.7223E+171]	0.6367	-1.201	0.2296	--	-1.261	0.2072	--	0.465	0.6417	+?	-1.236	0.2165	+-+---+	-1.246	0.2127	+-+---+	0.287	0.7738	?????+?
3	ACAD9	9	MISSLOF	FALSE	0.0001	48 (1)	24 (0)	0.75 [0.43-1.29]	0.30093	0.73 [0.42-1.28]	0.28059	12453 [0-5.7223E+171]	0.6367	-1.103	0.2698	-+	-1.159	0.2466	-+	0.465	0.6417	+?	-1.125	0.2608	+-+----	-1.135	0.2564	+-+----	0.287	0.7738	?????+?
3	ACAD9	5	MISSLOF	TRUE	0.001	39 (1)	25 (0)	0.63 [0.36-1.11]	0.11496	0.62 [0.35-1.09]	0.10246	12453 [0-5.7223E+171]	0.6367	-1.684	0.0921	--	-1.747	0.08069	--	0.465	0.6417	+?	-2.045	0.04085	+-+----	-2.033	0.04202	+-+----	0.287	0.7738	?????+?
3	ACAD9	8	MISSLOF	FALSE	0.001	61 (1)	30 (0)	0.72 [0.44-1.19]	0.20525	0.71 [0.43-1.18]	0.19073	12453 [0-5.7223E+171]	0.6367	-1.305	0.1918	-+	-1.355	0.1756	-+	0.465	0.6417	+?	-1.725	0.0846	+------	-1.713	0.08673	+------	0.287	0.7738	?????+?
3	ACAD9	4	MISSLOF	TRUE	0.01	52 (1)	30 (0)	0.64 [0.38-1.06]	0.088223	0.62 [0.37-1.05]	0.079105	12453 [0-5.7223E+171]	0.6367	-1.572	0.116	-+	-1.651	0.09869	-+	0.465	0.6417	+?	-2.443	0.01457	+-+----	-2.431	0.01505	+-+----	0.287	0.7738	?????+?
3	ACAD9	7	MISSLOF	FALSE	0.01	74 (1)	35 (0)	0.71 [0.45-1.13]	0.15558	0.7 [0.44-1.12]	0.14441	12453 [0-5.7223E+171]	0.6367	-1.425	0.154	-+	-1.466	0.1427	-+	0.465	0.6417	+?	-1.903	0.05701	+-+----	-1.892	0.05855	+-+----	0.287	0.7738	?????+?
2	ACADL	3	LOF	-	0.0001	7 (1)	0 (0)	103460 [0-3.3924E+152]	0.13654	141050 [0-6.2496E+171]	0.13654	9107 [0-4.1847E+171]	0.68406	1.5	0.1335	++	1.5	0.1335	++	0.372	0.7101	?+	1.45	0.1471	++++???	1.45	0.1471	++++???	0.429	0.6677	???+???
2	ACADL	2	LOF	-	0.001	16 (1)	2 (0)	1.25 [0.28-5.6]	0.76227	1.22 [0.26-5.75]	0.79671	9107 [0-4.1847E+171]	0.68406	0.776	0.4378	++	0.776	0.4378	++	0.372	0.7101	?+	1.404	0.1602	++++-+?	1.404	0.1602	++++-+?	0.429	0.6677	???+???
2	ACADL	1	LOF	-	0.01	36 (2)	13 (0)	0.97 [0.49-1.93]	0.92529	0.93 [0.45-1.91]	0.83993	45615 [0-8.6339E+193]	0.43236	-0.336	0.7366	-+	-0.503	0.6153	-+	0.767	0.4434	++	0.855	0.3926	++++-++	0.787	0.4313	++++-++	0.883	0.3775	???+???
2	ACADL	6	MISSLOF	TRUE	0.0001	16 (1)	3 (0)	1.06 [0.29-3.79]	0.9332	1.02 [0.27-3.85]	0.97282	9107 [0-4.1847E+171]	0.68406	1.434	0.1515	++	1.434	0.1515	++	0.372	0.7101	?+	0.31	0.7563	++++-?-	0.266	0.7905	++++-?-	0.429	0.6677	???+???
2	ACADL	9	MISSLOF	FALSE	0.0001	25 (1)	11 (0)	0.6 [0.28-1.3]	0.21153	0.58 [0.26-1.28]	0.18869	9107 [0-4.1847E+171]	0.68406	-1.268	0.2047	-+	-1.278	0.2013	-+	0.372	0.7101	?+	-0.281	0.7788	+-++-+-	-0.23	0.8183	+-++-+-	0.429	0.6677	???+???
2	ACADL	5	MISSLOF	TRUE	0.001	29 (1)	5 (0)	1.24 [0.45-3.37]	0.66961	1.22 [0.44-3.39]	0.6917	9107 [0-4.1847E+171]	0.68406	1.214	0.2249	++	1.214	0.2249	++	0.372	0.7101	?+	1.313	0.1891	++++-+-	1.306	0.1916	++++-+-	0.429	0.6677	???+???
2	ACADL	8	MISSLOF	FALSE	0.001	54 (1)	15 (0)	0.92 [0.49-1.73]	0.79192	0.91 [0.48-1.72]	0.76938	9107 [0-4.1847E+171]	0.68406	1.683	0.09245	++	1.678	0.09344	++	0.372	0.7101	?+	0.392	0.6951	+-++-+-	0.372	0.7102	+-++-+-	0.429	0.6677	???+???
2	ACADL	4	MISSLOF	TRUE	0.01	71 (3)	22 (0)	1.13 [0.67-1.93]	0.64025	1.1 [0.64-1.91]	0.72028	50823 [0-3.2148E+160]	0.31455	0.329	0.7418	-+	0.239	0.8115	-+	1.07	0.2844	++	1.415	0.1571	++++-+-	1.262	0.207	++++-+-	1.142	0.2534	???++??
2	ACADL	7	MISSLOF	FALSE	0.01	94 (3)	32 (0)	0.99 [0.63-1.55]	0.96406	0.96 [0.61-1.53]	0.87668	50823 [0-3.2148E+160]	0.31455	-0.134	0.8931	-+	-0.223	0.8236	-+	1.07	0.2844	++	0.766	0.4436	+-++-++	0.617	0.5372	+-++-++	1.142	0.2534	???++??
1	ACADM	6	MISSLOF	TRUE	0.0001	24 (0)	4 (0)	1.94 [0.62-6.04]	0.22706	1.94 [0.62-6.04]	0.22706	NA	NA	1.122	0.2621	++	1.122	0.2621	++	NA	NA	NA	1.205	0.2282	++++--?	1.205	0.2282	++++--?	NA	NA	NA
1	ACADM	9	MISSLOF	FALSE	0.0001	24 (0)	5 (0)	1.49 [0.53-4.23]	0.43844	1.49 [0.53-4.23]	0.43844	NA	NA	0.716	0.4742	++	0.716	0.4742	++	NA	NA	NA	0.763	0.4456	++++--?	0.763	0.4456	++++--?	NA	NA	NA
1	ACADM	5	MISSLOF	TRUE	0.001	42 (1)	16 (0)	1.03 [0.54-1.99]	0.92699	1.02 [0.53-1.98]	0.94759	9190 [0-4.2235E+171]	0.68293	0.07	0.9438	-+	0.025	0.9798	-+	0.467	0.6406	+?	0.417	0.6766	++++--+	0.417	0.6766	++++--+	0.452	0.6515	+??????
1	ACADM	8	MISSLOF	FALSE	0.001	42 (1)	17 (0)	0.95 [0.5-1.8]	0.86968	0.94 [0.49-1.8]	0.84724	9190 [0-4.2235E+171]	0.68293	-0.182	0.8553	-+	-0.228	0.82	-+	0.467	0.6406	+?	0.236	0.8131	++++--+	0.236	0.8131	++++--+	0.452	0.6515	+??????
1	ACADM	4	MISSLOF	TRUE	0.01	72 (1)	31 (0)	1.11 [0.69-1.79]	0.67216	1.1 [0.68-1.79]	0.6846	9190 [0-4.2235E+171]	0.68293	0.434	0.6645	-+	0.446	0.6558	-+	0.467	0.6406	+?	0.372	0.7095	+-++--+	0.372	0.7095	+-++--+	0.452	0.6515	+??????
1	ACADM	7	MISSLOF	FALSE	0.01	72 (1)	32 (0)	1.06 [0.66-1.7]	0.81484	1.05 [0.65-1.7]	0.82881	9190 [0-4.2235E+171]	0.68293	-0.278	0.7809	--	-0.266	0.7901	--	0.467	0.6406	+?	0.2	0.8417	+-++--+	0.2	0.8417	+-++--+	0.452	0.6515	+??????
12	ACADS	3	LOF	-	0.0001	1 (0)	2 (0)	0.23 [0.01-3.49]	0.27524	0.23 [0.01-3.49]	0.27524	NA	NA	-0.296	0.7671	+-	-0.296	0.7671	+-	NA	NA	NA	-0.906	0.3649	???-???	-0.906	0.3649	???-???	NA	NA	NA
12	ACADS	2	LOF	-	0.001	1 (0)	2 (0)	0.23 [0.01-3.49]	0.27524	0.23 [0.01-3.49]	0.27524	NA	NA	-0.296	0.7671	+-	-0.296	0.7671	+-	NA	NA	NA	-0.906	0.3649	???-???	-0.906	0.3649	???-???	NA	NA	NA
12	ACADS	1	LOF	-	0.01	1 (0)	2 (0)	0.23 [0.01-3.49]	0.27524	0.23 [0.01-3.49]	0.27524	NA	NA	-0.296	0.7671	+-	-0.296	0.7671	+-	NA	NA	NA	-0.906	0.3649	???-???	-0.906	0.3649	???-???	NA	NA	NA
12	ACADS	6	MISSLOF	TRUE	0.0001	28 (0)	15 (0)	0.93 [0.46-1.91]	0.84962	0.93 [0.46-1.91]	0.84962	NA	NA	0.064	0.9492	+-	0.064	0.9492	+-	NA	NA	NA	0.115	0.9086	+---+++	0.115	0.9086	+---+++	NA	NA	NA
12	ACADS	9	MISSLOF	FALSE	0.0001	36 (0)	16 (0)	1.04 [0.53-2.06]	0.90213	1.04 [0.53-2.06]	0.90213	NA	NA	0.322	0.7473	+-	0.322	0.7473	+-	NA	NA	NA	0.561	0.5748	+---+++	0.561	0.5748	+---+++	NA	NA	NA
12	ACADS	5	MISSLOF	TRUE	0.001	41 (0)	16 (0)	1.11 [0.57-2.14]	0.75744	1.11 [0.57-2.14]	0.75744	NA	NA	0.52	0.6033	+-	0.52	0.6033	+-	NA	NA	NA	0.81	0.4178	+---+++	0.81	0.4178	+---+++	NA	NA	NA
12	ACADS	8	MISSLOF	FALSE	0.001	55 (0)	18 (0)	1.19 [0.64-2.18]	0.58172	1.19 [0.64-2.18]	0.58172	NA	NA	0.732	0.4639	+-	0.732	0.4639	+-	NA	NA	NA	0.915	0.3602	+---+++	0.915	0.3602	+---+++	NA	NA	NA
12	ACADS	4	MISSLOF	TRUE	0.01	56 (0)	19 (0)	1.04 [0.57-1.89]	0.90122	1.04 [0.57-1.89]	0.90122	NA	NA	0.216	0.8289	+-	0.216	0.8289	+-	NA	NA	NA	0.238	0.8118	+---+++	0.238	0.8118	+---+++	NA	NA	NA
12	ACADS	7	MISSLOF	FALSE	0.01	70 (0)	21 (0)	1.11 [0.63-1.94]	0.71671	1.11 [0.63-1.94]	0.71671	NA	NA	0.455	0.6488	+-	0.455	0.6488	+-	NA	NA	NA	0.353	0.7244	+---+++	0.353	0.7244	+---+++	NA	NA	NA
10	ACADSB	3	LOF	-	0.0001	3 (0)	0 (0)	93681 [0-3.1948E+238]	0.36275	93681 [0-3.1948E+238]	0.36275	NA	NA	0.943	0.3455	+?	0.943	0.3455	+?	NA	NA	NA	0.752	0.452	+??+???	0.752	0.452	+??+???	NA	NA	NA
10	ACADSB	2	LOF	-	0.001	5 (0)	2 (0)	0.59 [0.1-3.43]	0.56842	0.59 [0.1-3.43]	0.56842	NA	NA	-0.538	0.5904	-?	-0.538	0.5904	-?	NA	NA	NA	1.051	0.2934	+?++???	1.051	0.2934	+?++???	NA	NA	NA
10	ACADSB	1	LOF	-	0.01	5 (0)	2 (0)	0.59 [0.1-3.43]	0.56842	0.59 [0.1-3.43]	0.56842	NA	NA	-0.538	0.5904	-?	-0.538	0.5904	-?	NA	NA	NA	1.051	0.2934	+?++???	1.051	0.2934	+?++???	NA	NA	NA
10	ACADSB	6	MISSLOF	TRUE	0.0001	15 (0)	6 (0)	0.76 [0.26-2.22]	0.62539	0.76 [0.26-2.22]	0.62539	NA	NA	-0.201	0.8406	+-	-0.201	0.8406	+-	NA	NA	NA	-0.648	0.5172	+-?+-+?	-0.648	0.5172	+-?+-+?	NA	NA	NA
10	ACADSB	9	MISSLOF	FALSE	0.0001	18 (0)	10 (0)	0.55 [0.22-1.34]	0.19741	0.55 [0.22-1.34]	0.19741	NA	NA	-1.119	0.2632	--	-1.119	0.2632	--	NA	NA	NA	-1.632	0.1027	+-?--+?	-1.632	0.1027	+-?--+?	NA	NA	NA
10	ACADSB	5	MISSLOF	TRUE	0.001	27 (0)	10 (0)	0.93 [0.42-2.06]	0.85719	0.93 [0.42-2.06]	0.85719	NA	NA	-0.193	0.8471	+-	-0.193	0.8471	+-	NA	NA	NA	0.316	0.7522	+-++-+?	0.316	0.7522	+-++-+?	NA	NA	NA
10	ACADSB	8	MISSLOF	FALSE	0.001	41 (0)	19 (0)	0.78 [0.42-1.45]	0.42873	0.78 [0.42-1.45]	0.42873	NA	NA	-0.882	0.3775	+-	-0.882	0.3775	+-	NA	NA	NA	-0.175	0.8607	-++--++	-0.175	0.8607	-++--++	NA	NA	NA
10	ACADSB	4	MISSLOF	TRUE	0.01	27 (0)	10 (0)	0.93 [0.42-2.06]	0.85719	0.93 [0.42-2.06]	0.85719	NA	NA	-0.193	0.8471	+-	-0.193	0.8471	+-	NA	NA	NA	0.316	0.7522	+-++-+?	0.316	0.7522	+-++-+?	NA	NA	NA
10	ACADSB	7	MISSLOF	FALSE	0.01	98 (1)	25 (0)	0.94 [0.56-1.58]	0.81377	0.94 [0.56-1.58]	0.80994	1827.6 [0-8.4013E+170]	0.85303	1.486	0.1372	++	1.484	0.1378	++	0.143	0.8864	+?	-0.048	0.9616	-++--++	-0.048	0.9616	-++--++	NA	NA	NA
17	ACADVL	3	LOF	-	0.0001	6 (0)	2 (0)	0.92 [0.15-5.48]	0.92788	0.92 [0.15-5.48]	0.92788	NA	NA	-0.518	0.6043	-+	-0.518	0.6043	-+	NA	NA	NA	0.307	0.759	+??+-??	0.307	0.759	+??+-??	NA	NA	NA
17	ACADVL	2	LOF	-	0.001	6 (0)	2 (0)	0.92 [0.15-5.48]	0.92788	0.92 [0.15-5.48]	0.92788	NA	NA	-0.518	0.6043	-+	-0.518	0.6043	-+	NA	NA	NA	0.307	0.759	+??+-??	0.307	0.759	+??+-??	NA	NA	NA
17	ACADVL	1	LOF	-	0.01	6 (0)	2 (0)	0.92 [0.15-5.48]	0.92788	0.92 [0.15-5.48]	0.92788	NA	NA	-0.518	0.6043	-+	-0.518	0.6043	-+	NA	NA	NA	0.307	0.759	+??+-??	0.307	0.759	+??+-??	NA	NA	NA
17	ACADVL	6	MISSLOF	TRUE	0.0001	36 (0)	15 (0)	1.01 [0.49-2.07]	0.97557	1.01 [0.49-2.07]	0.97557	NA	NA	0.127	0.8991	-+	0.127	0.8991	-+	NA	NA	NA	0.368	0.7125	-+-+--+	0.368	0.7125	-+-+--+	NA	NA	NA
17	ACADVL	9	MISSLOF	FALSE	0.0001	41 (0)	17 (0)	0.98 [0.5-1.92]	0.94573	0.98 [0.5-1.92]	0.94573	NA	NA	0.043	0.9659	-+	0.043	0.9659	-+	NA	NA	NA	0.429	0.6682	-+-+--+	0.429	0.6682	-+-+--+	NA	NA	NA
17	ACADVL	5	MISSLOF	TRUE	0.001	62 (1)	23 (0)	1.14 [0.65-1.99]	0.64797	1.13 [0.64-1.99]	0.66547	11836 [0-5.4388E+171]	0.64469	0.508	0.6113	-+	0.499	0.618	-+	0.478	0.6326	?+	0.929	0.3531	++-+--+	0.916	0.3597	++-+--+	0.494	0.621	???+???
17	ACADVL	8	MISSLOF	FALSE	0.001	67 (1)	25 (0)	1.1 [0.65-1.89]	0.71522	1.1 [0.64-1.89]	0.73345	11836 [0-5.4388E+171]	0.64469	0.428	0.6684	-+	0.42	0.6746	-+	0.478	0.6326	?+	0.964	0.3351	++-+--+	0.951	0.3415	++-+--+	0.494	0.621	???+???
17	ACADVL	4	MISSLOF	TRUE	0.01	144 (2)	49 (0)	1.12 [0.77-1.63]	0.54524	1.11 [0.76-1.63]	0.58498	58812 [0-9.9598E+192]	0.37628	0.502	0.616	++	0.447	0.6551	++	0.839	0.4014	++	0.752	0.4521	++-+--+	0.667	0.5048	++-+--+	1.221	0.222	???+???
17	ACADVL	7	MISSLOF	FALSE	0.01	212 (4)	61 (0)	1.16 [0.83-1.63]	0.38568	1.15 [0.82-1.62]	0.4223	94322 [0-1.8226E+219]	0.32042	0.835	0.4037	++	0.769	0.4418	++	0.988	0.3233	++	1.047	0.295	++-+--+	0.957	0.3385	++-+--+	1.25	0.2113	+??+???
15	ACAN	3	LOF	-	0.0001	10 (0)	1 (0)	5.76 [0.82-40.55]	0.033286	5.76 [0.82-40.55]	0.033286	NA	NA	2.159	0.03082	++	2.159	0.03082	++	NA	NA	NA	2.305	0.02116	-+?+++?	2.305	0.02116	-+?+++?	NA	NA	NA
15	ACAN	2	LOF	-	0.001	10 (0)	1 (0)	5.76 [0.82-40.55]	0.033286	5.76 [0.82-40.55]	0.033286	NA	NA	2.159	0.03082	++	2.159	0.03082	++	NA	NA	NA	2.305	0.02116	-+?+++?	2.305	0.02116	-+?+++?	NA	NA	NA
15	ACAN	1	LOF	-	0.01	10 (0)	1 (0)	5.76 [0.82-40.55]	0.033286	5.76 [0.82-40.55]	0.033286	NA	NA	2.159	0.03082	++	2.159	0.03082	++	NA	NA	NA	2.305	0.02116	-+?+++?	2.305	0.02116	-+?+++?	NA	NA	NA
15	ACAN	6	MISSLOF	TRUE	0.0001	104 (0)	38 (0)	1.31 [0.85-2.02]	0.21705	1.31 [0.85-2.02]	0.21705	NA	NA	1.183	0.2366	++	1.183	0.2366	++	NA	NA	NA	0.796	0.426	-+-++--	0.796	0.426	-+-++--	NA	NA	NA
15	ACAN	9	MISSLOF	FALSE	0.0001	149 (0)	58 (0)	1.07 [0.74-1.53]	0.73109	1.07 [0.74-1.53]	0.73109	NA	NA	0.238	0.8118	-+	0.238	0.8118	-+	NA	NA	NA	-0.125	0.9002	-+-++--	-0.125	0.9002	-+-++--	NA	NA	NA
15	ACAN	5	MISSLOF	TRUE	0.001	178 (0)	50 (0)	1.43 [0.99-2.07]	0.049178	1.43 [0.99-2.07]	0.049178	NA	NA	2.042	0.04114	++	2.042	0.04114	++	NA	NA	NA	2.039	0.04142	+++++-+	2.039	0.04142	+++++-+	NA	NA	NA
15	ACAN	8	MISSLOF	FALSE	0.001	251 (0)	81 (0)	1.16 [0.86-1.56]	0.33795	1.16 [0.86-1.56]	0.33795	NA	NA	0.946	0.344	++	0.946	0.344	++	NA	NA	NA	0.515	0.6063	++-++-+	0.515	0.6063	++-++-+	NA	NA	NA
15	ACAN	4	MISSLOF	TRUE	0.01	311 (7)	98 (2)	1.02 [0.78-1.35]	0.87426	1.03 [0.77-1.36]	0.85665	0.89 [0.14-5.77]	0.90377	0.285	0.7755	++	0.326	0.7444	++	-0.294	0.769	+-	0.63	0.5287	--+++-+	0.712	0.4765	--+++-+	-0.826	0.409	-????+?
15	ACAN	7	MISSLOF	FALSE	0.01	520 (8)	167 (2)	0.99 [0.78-1.24]	0.897	0.98 [0.78-1.24]	0.89091	1.04 [0.17-6.35]	0.96504	0.675	0.4997	++	0.785	0.4326	++	-0.145	0.8847	+-	0.116	0.9079	---++-+	0.154	0.8779	---++-+	-0.42	0.6747	-????+?
17	ACAP1	6	MISSLOF	TRUE	0.0001	28 (1)	9 (0)	1.34 [0.59-3.04]	0.46997	1.27 [0.54-3]	0.58345	111280 [0-5.1134E+172]	0.23066	0.823	0.4108	++	0.66	0.5095	++	1.142	0.2535	+?	0.04	0.9684	+-+-++-	0.04	0.9684	+-+-++-	0.23	0.8183	?????+?
17	ACAP1	9	MISSLOF	FALSE	0.0001	40 (1)	13 (0)	1.37 [0.69-2.75]	0.36326	1.32 [0.64-2.71]	0.44368	111280 [0-5.1134E+172]	0.23066	0.974	0.3301	++	0.819	0.4126	++	1.142	0.2535	+?	0.179	0.8582	+++--+-	0.179	0.8582	+++--+-	0.23	0.8183	?????+?
17	ACAP1	5	MISSLOF	TRUE	0.001	33 (1)	13 (0)	0.95 [0.46-1.95]	0.88175	0.87 [0.41-1.85]	0.72255	111280 [0-5.1134E+172]	0.23066	-0.012	0.9907	-+	-0.21	0.8339	-+	1.142	0.2535	+?	-0.655	0.5124	--+-++-	-0.655	0.5124	--+-++-	0.23	0.8183	?????+?
17	ACAP1	8	MISSLOF	FALSE	0.001	45 (1)	17 (0)	1.05 [0.56-1.97]	0.88259	0.99 [0.52-1.91]	0.98624	111280 [0-5.1134E+172]	0.23066	0.254	0.7995	-+	0.079	0.9373	-+	1.142	0.2535	+?	-0.399	0.69	--+--+-	-0.399	0.69	--+--+-	0.23	0.8183	?????+?
17	ACAP1	4	MISSLOF	TRUE	0.01	139 (2)	48 (1)	1.12 [0.77-1.64]	0.54172	1.11 [0.75-1.65]	0.58681	2.07 [0.16-27.41]	0.57196	0.149	0.8814	+-	0.105	0.9164	+-	-0.399	0.6895	-?	-0.029	0.9772	--+-+++	0.023	0.9814	--+-+++	-0.458	0.6472	???-?+?
17	ACAP1	7	MISSLOF	FALSE	0.01	151 (2)	52 (1)	1.15 [0.8-1.65]	0.45618	1.14 [0.78-1.66]	0.49363	2.07 [0.16-27.41]	0.57196	0.704	0.4816	++	0.657	0.5109	++	-0.399	0.6895	-?	0.015	0.9881	--+-+++	0.07	0.9445	--+-+++	-0.458	0.6472	???-?+?
3	ACAP2	6	MISSLOF	TRUE	0.0001	15 (0)	7 (0)	0.63 [0.23-1.71]	0.37632	0.63 [0.23-1.71]	0.37632	NA	NA	-0.914	0.3606	--	-0.914	0.3606	--	NA	NA	NA	-0.634	0.526	++---++	-0.634	0.526	++---++	NA	NA	NA
3	ACAP2	9	MISSLOF	FALSE	0.0001	18 (0)	7 (0)	0.72 [0.27-1.88]	0.5076	0.72 [0.27-1.88]	0.5076	NA	NA	-0.199	0.8419	+-	-0.199	0.8419	+-	NA	NA	NA	-0.214	0.8302	++--+++	-0.214	0.8302	++--+++	NA	NA	NA
3	ACAP2	5	MISSLOF	TRUE	0.001	20 (0)	10 (0)	0.63 [0.26-1.53]	0.31547	0.63 [0.26-1.53]	0.31547	NA	NA	-0.942	0.346	-+	-0.942	0.346	-+	NA	NA	NA	-1.071	0.2844	+----++	-1.071	0.2844	+----++	NA	NA	NA
3	ACAP2	8	MISSLOF	FALSE	0.001	27 (0)	11 (0)	0.8 [0.36-1.79]	0.59904	0.8 [0.36-1.79]	0.59904	NA	NA	0.53	0.596	+-	0.53	0.596	+-	NA	NA	NA	-0.428	0.669	+---+++	-0.428	0.669	+---+++	NA	NA	NA
3	ACAP2	4	MISSLOF	TRUE	0.01	20 (0)	10 (0)	0.63 [0.26-1.53]	0.31547	0.63 [0.26-1.53]	0.31547	NA	NA	-0.942	0.346	-+	-0.942	0.346	-+	NA	NA	NA	-1.071	0.2844	+----++	-1.071	0.2844	+----++	NA	NA	NA
3	ACAP2	7	MISSLOF	FALSE	0.01	46 (0)	29 (1)	0.64 [0.37-1.09]	0.10383	0.65 [0.38-1.12]	0.12534	0 [0-4.476E+162]	0.24389	-1.57	0.1164	--	-1.48	0.1388	--	-1.203	0.2289	-?	-1.501	0.1335	+----++	-1.441	0.1497	+----++	-1.104	0.2696	???-???
1	ACAP3	6	MISSLOF	TRUE	0.0001	43 (0)	12 (0)	1.28 [0.64-2.6]	0.47709	1.28 [0.64-2.6]	0.47709	NA	NA	0.633	0.527	++	0.633	0.527	++	NA	NA	NA	0.433	0.6651	--++++-	0.433	0.6651	--++++-	NA	NA	NA
1	ACAP3	9	MISSLOF	FALSE	0.0001	46 (0)	12 (0)	1.39 [0.69-2.79]	0.34906	1.39 [0.69-2.79]	0.34906	NA	NA	0.837	0.4027	++	0.837	0.4027	++	NA	NA	NA	0.555	0.5788	--++++-	0.555	0.5788	--++++-	NA	NA	NA
1	ACAP3	5	MISSLOF	TRUE	0.001	60 (0)	20 (0)	1.02 [0.57-1.8]	0.95903	1.02 [0.57-1.8]	0.95903	NA	NA	0.193	0.8468	++	0.193	0.8468	++	NA	NA	NA	-0.086	0.9316	--++++-	-0.086	0.9316	--++++-	NA	NA	NA
1	ACAP3	8	MISSLOF	FALSE	0.001	72 (0)	22 (0)	1.04 [0.61-1.78]	0.88876	1.04 [0.61-1.78]	0.88876	NA	NA	0.121	0.9035	++	0.121	0.9035	++	NA	NA	NA	0.025	0.9803	--++++-	0.025	0.9803	--++++-	NA	NA	NA
1	ACAP3	4	MISSLOF	TRUE	0.01	89 (0)	33 (0)	0.81 [0.51-1.28]	0.37541	0.81 [0.51-1.28]	0.37541	NA	NA	1.228	0.2196	++	1.228	0.2196	++	NA	NA	NA	-0.269	0.7876	--++++-	-0.269	0.7876	--++++-	NA	NA	NA
1	ACAP3	7	MISSLOF	FALSE	0.01	101 (0)	35 (0)	0.84 [0.54-1.31]	0.43837	0.84 [0.54-1.31]	0.43837	NA	NA	1.123	0.2616	++	1.123	0.2616	++	NA	NA	NA	0.174	0.8619	--++++-	0.174	0.8619	--++++-	NA	NA	NA
11	ACAT1	3	LOF	-	0.0001	4 (0)	1 (0)	2.27 [0.2-25.14]	0.48482	2.27 [0.2-25.14]	0.48482	NA	NA	0.601	0.5476	++	0.601	0.5476	++	NA	NA	NA	0.079	0.9367	?++-??+	0.079	0.9367	?++-??+	NA	NA	NA
11	ACAT1	2	LOF	-	0.001	4 (0)	1 (0)	2.27 [0.2-25.14]	0.48482	2.27 [0.2-25.14]	0.48482	NA	NA	0.601	0.5476	++	0.601	0.5476	++	NA	NA	NA	0.079	0.9367	?++-??+	0.079	0.9367	?++-??+	NA	NA	NA
11	ACAT1	1	LOF	-	0.01	4 (0)	1 (0)	2.27 [0.2-25.14]	0.48482	2.27 [0.2-25.14]	0.48482	NA	NA	0.601	0.5476	++	0.601	0.5476	++	NA	NA	NA	0.079	0.9367	?++-??+	0.079	0.9367	?++-??+	NA	NA	NA
11	ACAT1	6	MISSLOF	TRUE	0.0001	21 (1)	8 (0)	0.97 [0.39-2.41]	0.94002	0.94 [0.36-2.41]	0.89307	13954 [0-6.4117E+171]	0.61818	-0.255	0.7989	-+	-0.352	0.7252	-+	0.495	0.6209	+?	0.359	0.7195	+++-+?+	0.359	0.7195	+++-+?+	0.401	0.6882	????+??
11	ACAT1	9	MISSLOF	FALSE	0.0001	22 (1)	11 (0)	0.69 [0.31-1.54]	0.37295	0.66 [0.28-1.52]	0.33031	13954 [0-6.4117E+171]	0.61818	-1.022	0.3068	-+	-1.153	0.2488	-+	0.495	0.6209	+?	-0.48	0.6314	-++-+?+	-0.48	0.6314	-++-+?+	0.401	0.6882	????+??
11	ACAT1	5	MISSLOF	TRUE	0.001	30 (1)	10 (0)	1.23 [0.55-2.75]	0.60985	1.22 [0.54-2.75]	0.63567	13954 [0-6.4117E+171]	0.61818	0.393	0.6943	++	0.344	0.7308	++	0.495	0.6209	+?	1.162	0.2451	+++-+++	1.162	0.2451	+++-+++	0.401	0.6882	????+??
11	ACAT1	8	MISSLOF	FALSE	0.001	31 (1)	13 (0)	0.91 [0.44-1.89]	0.8078	0.89 [0.43-1.88]	0.76922	13954 [0-6.4117E+171]	0.61818	-0.38	0.7043	-+	-0.453	0.6507	-+	0.495	0.6209	+?	0.398	0.6904	-++-+++	0.398	0.6904	-++-+++	0.401	0.6882	????+??
11	ACAT1	4	MISSLOF	TRUE	0.01	30 (1)	10 (0)	1.23 [0.55-2.75]	0.60985	1.22 [0.54-2.75]	0.63567	13954 [0-6.4117E+171]	0.61818	0.393	0.6943	++	0.344	0.7308	++	0.495	0.6209	+?	1.162	0.2451	+++-+++	1.162	0.2451	+++-+++	0.401	0.6882	????+??
11	ACAT1	7	MISSLOF	FALSE	0.01	31 (1)	13 (0)	0.91 [0.44-1.89]	0.8078	0.89 [0.43-1.88]	0.76922	13954 [0-6.4117E+171]	0.61818	-0.38	0.7043	-+	-0.453	0.6507	-+	0.495	0.6209	+?	0.398	0.6904	-++-+++	0.398	0.6904	-++-+++	0.401	0.6882	????+??
6	ACAT2	6	MISSLOF	TRUE	0.0001	4 (0)	0 (0)	191970 [0-2.6281E+195]	0.14881	191970 [0-2.6281E+195]	0.14881	NA	NA	1.4	0.1616	+?	1.4	0.1616	+?	NA	NA	NA	1.334	0.1822	???+?++	1.334	0.1822	???+?++	NA	NA	NA
6	ACAT2	9	MISSLOF	FALSE	0.0001	17 (0)	3 (0)	2.36 [0.58-9.54]	0.19416	2.36 [0.58-9.54]	0.19416	NA	NA	1.221	0.2221	++	1.221	0.2221	++	NA	NA	NA	1.415	0.157	-+?+-++	1.415	0.157	-+?+-++	NA	NA	NA
6	ACAT2	5	MISSLOF	TRUE	0.001	4 (0)	0 (0)	191970 [0-2.6281E+195]	0.14881	191970 [0-2.6281E+195]	0.14881	NA	NA	1.4	0.1616	+?	1.4	0.1616	+?	NA	NA	NA	1.334	0.1822	???+?++	1.334	0.1822	???+?++	NA	NA	NA
6	ACAT2	8	MISSLOF	FALSE	0.001	21 (0)	4 (0)	2.13 [0.63-7.29]	0.19921	2.13 [0.63-7.29]	0.19921	NA	NA	1.19	0.2339	++	1.19	0.2339	++	NA	NA	NA	1.616	0.1061	-+?+-++	1.616	0.1061	-+?+-++	NA	NA	NA
6	ACAT2	4	MISSLOF	TRUE	0.01	4 (0)	0 (0)	191970 [0-2.6281E+195]	0.14881	191970 [0-2.6281E+195]	0.14881	NA	NA	1.4	0.1616	+?	1.4	0.1616	+?	NA	NA	NA	1.334	0.1822	???+?++	1.334	0.1822	???+?++	NA	NA	NA
6	ACAT2	7	MISSLOF	FALSE	0.01	23 (0)	4 (0)	2.3 [0.69-7.71]	0.14877	2.3 [0.69-7.71]	0.14877	NA	NA	1.429	0.153	++	1.429	0.153	++	NA	NA	NA	1.839	0.06598	-+++-++	1.839	0.06598	-+++-++	NA	NA	NA
1	ACBD3	9	MISSLOF	FALSE	0.0001	18 (0)	4 (0)	2.24 [0.61-8.25]	0.20786	2.24 [0.61-8.25]	0.20786	NA	NA	1.309	0.1907	+-	1.309	0.1907	+-	NA	NA	NA	1.197	0.2314	++++-++	1.197	0.2314	++++-++	NA	NA	NA
1	ACBD3	5	MISSLOF	TRUE	0.001	3 (0)	2 (0)	0.72 [0.08-6.25]	0.77147	0.72 [0.08-6.25]	0.77147	NA	NA	0.067	0.9464	+-	0.067	0.9464	+-	NA	NA	NA	0.562	0.5738	???+???	0.562	0.5738	???+???	NA	NA	NA
1	ACBD3	8	MISSLOF	FALSE	0.001	34 (0)	11 (0)	1.23 [0.56-2.7]	0.60073	1.23 [0.56-2.7]	0.60073	NA	NA	0.392	0.6953	+-	0.392	0.6953	+-	NA	NA	NA	0.924	0.3553	-+++-++	0.924	0.3553	-+++-++	NA	NA	NA
1	ACBD3	4	MISSLOF	TRUE	0.01	3 (0)	2 (0)	0.72 [0.08-6.25]	0.77147	0.72 [0.08-6.25]	0.77147	NA	NA	0.067	0.9464	+-	0.067	0.9464	+-	NA	NA	NA	0.562	0.5738	???+???	0.562	0.5738	???+???	NA	NA	NA
1	ACBD3	7	MISSLOF	FALSE	0.01	60 (0)	28 (0)	0.84 [0.5-1.41]	0.51271	0.84 [0.5-1.41]	0.51271	NA	NA	-0.618	0.5366	+-	-0.618	0.5366	+-	NA	NA	NA	-0.301	0.7634	---+-+-	-0.301	0.7634	---+-+-	NA	NA	NA
17	ACBD4	3	LOF	-	0.0001	6 (0)	2 (0)	1.26 [0.23-7.06]	0.78813	1.26 [0.23-7.06]	0.78813	NA	NA	0.306	0.7594	++	0.306	0.7594	++	NA	NA	NA	0.522	0.6016	+??+++?	0.522	0.6016	+??+++?	NA	NA	NA
17	ACBD4	2	LOF	-	0.001	6 (0)	2 (0)	1.26 [0.23-7.06]	0.78813	1.26 [0.23-7.06]	0.78813	NA	NA	0.306	0.7594	++	0.306	0.7594	++	NA	NA	NA	0.522	0.6016	+??+++?	0.522	0.6016	+??+++?	NA	NA	NA
17	ACBD4	1	LOF	-	0.01	6 (0)	2 (0)	1.26 [0.23-7.06]	0.78813	1.26 [0.23-7.06]	0.78813	NA	NA	0.306	0.7594	++	0.306	0.7594	++	NA	NA	NA	0.522	0.6016	+??+++?	0.522	0.6016	+??+++?	NA	NA	NA
17	ACBD4	6	MISSLOF	TRUE	0.0001	18 (0)	8 (0)	0.85 [0.34-2.12]	0.73143	0.85 [0.34-2.12]	0.73143	NA	NA	-0.168	0.8666	-+	-0.168	0.8666	-+	NA	NA	NA	-0.35	0.7261	+-++-++	-0.35	0.7261	+-++-++	NA	NA	NA
17	ACBD4	9	MISSLOF	FALSE	0.0001	33 (0)	11 (0)	1.42 [0.66-3.05]	0.35476	1.42 [0.66-3.05]	0.35476	NA	NA	1.056	0.2908	++	1.056	0.2908	++	NA	NA	NA	0.667	0.5046	+-++-++	0.667	0.5046	+-++-++	NA	NA	NA
17	ACBD4	5	MISSLOF	TRUE	0.001	24 (0)	10 (0)	0.85 [0.38-1.94]	0.70717	0.85 [0.38-1.94]	0.70717	NA	NA	-0.236	0.8138	-+	-0.236	0.8138	-+	NA	NA	NA	-0.425	0.6707	--++-++	-0.425	0.6707	--++-++	NA	NA	NA
17	ACBD4	8	MISSLOF	FALSE	0.001	51 (0)	15 (0)	1.3 [0.68-2.49]	0.42409	1.3 [0.68-2.49]	0.42409	NA	NA	0.874	0.3822	++	0.874	0.3822	++	NA	NA	NA	0.59	0.5553	--++-++	0.59	0.5553	--++-++	NA	NA	NA
17	ACBD4	4	MISSLOF	TRUE	0.01	44 (0)	17 (0)	0.77 [0.4-1.46]	0.42546	0.77 [0.4-1.46]	0.42546	NA	NA	-0.528	0.5975	-+	-0.528	0.5975	-+	NA	NA	NA	-0.317	0.7516	--++-++	-0.317	0.7516	--++-++	NA	NA	NA
17	ACBD4	7	MISSLOF	FALSE	0.01	71 (0)	22 (0)	1.08 [0.62-1.88]	0.77677	1.08 [0.62-1.88]	0.77677	NA	NA	0.434	0.6644	++	0.434	0.6644	++	NA	NA	NA	0.575	0.5652	--++-++	0.575	0.5652	--++-++	NA	NA	NA
10	ACBD5	6	MISSLOF	TRUE	0.0001	21 (0)	4 (0)	1.19 [0.38-3.78]	0.75889	1.19 [0.38-3.78]	0.75889	NA	NA	0.672	0.5015	++	0.672	0.5015	++	NA	NA	NA	0.873	0.3827	+--++++	0.873	0.3827	+--++++	NA	NA	NA
10	ACBD5	9	MISSLOF	FALSE	0.0001	23 (0)	7 (0)	0.88 [0.32-2.38]	0.80082	0.88 [0.32-2.38]	0.80082	NA	NA	1.163	0.2448	++	1.163	0.2448	++	NA	NA	NA	0.48	0.6311	+--++++	0.48	0.6311	+--++++	NA	NA	NA
10	ACBD5	5	MISSLOF	TRUE	0.001	33 (0)	10 (0)	0.79 [0.35-1.82]	0.5904	0.79 [0.35-1.82]	0.5904	NA	NA	0.651	0.515	++	0.651	0.515	++	NA	NA	NA	0.388	0.6981	+--++++	0.388	0.6981	+--++++	NA	NA	NA
10	ACBD5	8	MISSLOF	FALSE	0.001	37 (0)	13 (0)	0.72 [0.33-1.54]	0.40283	0.72 [0.33-1.54]	0.40283	NA	NA	-0.748	0.4546	-+	-0.748	0.4546	-+	NA	NA	NA	0.552	0.581	+--++++	0.552	0.581	+--++++	NA	NA	NA
10	ACBD5	4	MISSLOF	TRUE	0.01	53 (1)	20 (0)	1.02 [0.55-1.91]	0.94797	0.94 [0.5-1.78]	0.85067	384280 [0-1.7659E+173]	0.080239	-0.251	0.8016	+-	-0.455	0.6489	+-	1.566	0.1173	+?	-0.192	0.8476	+---+++	-0.226	0.821	+---+++	1.539	0.1237	????+??
10	ACBD5	7	MISSLOF	FALSE	0.01	57 (1)	23 (0)	0.94 [0.52-1.72]	0.84971	0.87 [0.47-1.6]	0.66069	384280 [0-1.7659E+173]	0.080239	-0.506	0.613	+-	-0.709	0.4783	--	1.566	0.1173	+?	-0.308	0.7582	+---+++	-0.342	0.7324	+---+++	1.539	0.1237	????+??
1	ACBD6	6	MISSLOF	TRUE	0.0001	13 (0)	5 (0)	0.89 [0.28-2.86]	0.84739	0.89 [0.28-2.86]	0.84739	NA	NA	-0.323	0.7463	-+	-0.323	0.7463	-+	NA	NA	NA	0.772	0.4401	++?+-+?	0.772	0.4401	++?+-+?	NA	NA	NA
1	ACBD6	9	MISSLOF	FALSE	0.0001	16 (0)	7 (0)	0.68 [0.25-1.84]	0.45161	0.68 [0.25-1.84]	0.45161	NA	NA	-0.887	0.3752	-+	-0.887	0.3752	-+	NA	NA	NA	-0.541	0.5885	+-?+-+?	-0.541	0.5885	+-?+-+?	NA	NA	NA
1	ACBD6	5	MISSLOF	TRUE	0.001	15 (0)	5 (0)	1.06 [0.34-3.29]	0.91377	1.06 [0.34-3.29]	0.91377	NA	NA	-0.003	0.9977	-+	-0.003	0.9977	-+	NA	NA	NA	1.014	0.3107	++++-+?	1.014	0.3107	++++-+?	NA	NA	NA
1	ACBD6	8	MISSLOF	FALSE	0.001	19 (0)	7 (0)	0.8 [0.3-2.11]	0.66029	0.8 [0.3-2.11]	0.66029	NA	NA	-0.502	0.616	-+	-0.502	0.616	-+	NA	NA	NA	-0.256	0.7977	+-++-+?	-0.256	0.7977	+-++-+?	NA	NA	NA
1	ACBD6	4	MISSLOF	TRUE	0.01	15 (0)	5 (0)	1.06 [0.34-3.29]	0.91377	1.06 [0.34-3.29]	0.91377	NA	NA	-0.003	0.9977	-+	-0.003	0.9977	-+	NA	NA	NA	1.014	0.3107	++++-+?	1.014	0.3107	++++-+?	NA	NA	NA
1	ACBD6	7	MISSLOF	FALSE	0.01	19 (0)	7 (0)	0.8 [0.3-2.11]	0.66029	0.8 [0.3-2.11]	0.66029	NA	NA	-0.502	0.616	-+	-0.502	0.616	-+	NA	NA	NA	-0.256	0.7977	+-++-+?	-0.256	0.7977	+-++-+?	NA	NA	NA
10	ACBD7	2	LOF	-	0.001	8 (0)	1 (0)	1.6 [0.18-14.15]	0.65445	1.6 [0.18-14.15]	0.65445	NA	NA	0.443	0.6574	++	0.443	0.6574	++	NA	NA	NA	0.711	0.477	???+-?+	0.711	0.477	???+-?+	NA	NA	NA
10	ACBD7	1	LOF	-	0.01	8 (0)	1 (0)	1.6 [0.18-14.15]	0.65445	1.6 [0.18-14.15]	0.65445	NA	NA	0.443	0.6574	++	0.443	0.6574	++	NA	NA	NA	0.711	0.477	???+-?+	0.711	0.477	???+-?+	NA	NA	NA
10	ACBD7	9	MISSLOF	FALSE	0.0001	7 (0)	4 (0)	1.56 [0.39-6.22]	0.52513	1.56 [0.39-6.22]	0.52513	NA	NA	0.605	0.5455	-+	0.605	0.5455	-+	NA	NA	NA	0.527	0.5985	?-?+-??	0.527	0.5985	?-?+-??	NA	NA	NA
10	ACBD7	5	MISSLOF	TRUE	0.001	8 (0)	1 (0)	1.6 [0.18-14.15]	0.65445	1.6 [0.18-14.15]	0.65445	NA	NA	0.443	0.6574	++	0.443	0.6574	++	NA	NA	NA	0.711	0.477	???+-?+	0.711	0.477	???+-?+	NA	NA	NA
10	ACBD7	8	MISSLOF	FALSE	0.001	15 (0)	5 (0)	1.57 [0.49-5.06]	0.43658	1.57 [0.49-5.06]	0.43658	NA	NA	0.731	0.4651	-+	0.731	0.4651	-+	NA	NA	NA	0.718	0.4727	?-?+-?+	0.718	0.4727	?-?+-?+	NA	NA	NA
10	ACBD7	4	MISSLOF	TRUE	0.01	8 (0)	1 (0)	1.6 [0.18-14.15]	0.65445	1.6 [0.18-14.15]	0.65445	NA	NA	0.443	0.6574	++	0.443	0.6574	++	NA	NA	NA	0.711	0.477	???+-?+	0.711	0.477	???+-?+	NA	NA	NA
10	ACBD7	7	MISSLOF	FALSE	0.01	43 (0)	19 (0)	1.2 [0.65-2.23]	0.56092	1.2 [0.65-2.23]	0.56092	NA	NA	0.523	0.6008	-+	0.523	0.6008	-+	NA	NA	NA	0.75	0.453	++?+-++	0.75	0.453	++?+-++	NA	NA	NA
11	ACCS	3	LOF	-	0.0001	2 (0)	1 (0)	1.51 [0.03-68.22]	0.83088	1.51 [0.03-68.22]	0.83088	NA	NA	0.093	0.9262	+-	0.093	0.9262	+-	NA	NA	NA	-0.105	0.9162	+??-???	-0.105	0.9162	+??-???	NA	NA	NA
11	ACCS	2	LOF	-	0.001	2 (0)	1 (0)	1.51 [0.03-68.22]	0.83088	1.51 [0.03-68.22]	0.83088	NA	NA	0.093	0.9262	+-	0.093	0.9262	+-	NA	NA	NA	-0.105	0.9162	+??-???	-0.105	0.9162	+??-???	NA	NA	NA
11	ACCS	1	LOF	-	0.01	2 (0)	1 (0)	1.51 [0.03-68.22]	0.83088	1.51 [0.03-68.22]	0.83088	NA	NA	0.093	0.9262	+-	0.093	0.9262	+-	NA	NA	NA	-0.105	0.9162	+??-???	-0.105	0.9162	+??-???	NA	NA	NA
11	ACCS	6	MISSLOF	TRUE	0.0001	39 (0)	12 (0)	1.13 [0.54-2.36]	0.7511	1.13 [0.54-2.36]	0.7511	NA	NA	-0.059	0.9532	+-	-0.059	0.9532	+-	NA	NA	NA	-0.317	0.751	+-+-+-+	-0.317	0.751	+-+-+-+	NA	NA	NA
11	ACCS	9	MISSLOF	FALSE	0.0001	47 (0)	14 (0)	1.06 [0.53-2.1]	0.86998	1.06 [0.53-2.1]	0.86998	NA	NA	0.09	0.9279	+-	0.09	0.9279	+-	NA	NA	NA	-0.614	0.5389	+-+-+-+	-0.614	0.5389	+-+-+-+	NA	NA	NA
11	ACCS	5	MISSLOF	TRUE	0.001	93 (0)	28 (0)	1.19 [0.73-1.93]	0.48164	1.19 [0.73-1.93]	0.48164	NA	NA	0.591	0.5542	++	0.591	0.5542	++	NA	NA	NA	1.024	0.3059	+-+++-+	1.024	0.3059	+-+++-+	NA	NA	NA
11	ACCS	8	MISSLOF	FALSE	0.001	101 (0)	31 (0)	1.09 [0.69-1.73]	0.71053	1.09 [0.69-1.73]	0.71053	NA	NA	0.207	0.836	++	0.207	0.836	++	NA	NA	NA	1.046	0.2955	+-+++-+	1.046	0.2955	+-+++-+	NA	NA	NA
11	ACCS	4	MISSLOF	TRUE	0.01	162 (0)	39 (0)	1.37 [0.92-2.06]	0.11677	1.37 [0.92-2.06]	0.11677	NA	NA	1.654	0.09806	++	1.654	0.09806	++	NA	NA	NA	0.721	0.4711	+--++-+	0.721	0.4711	+--++-+	NA	NA	NA
11	ACCS	7	MISSLOF	FALSE	0.01	170 (0)	42 (0)	1.29 [0.87-1.9]	0.20184	1.29 [0.87-1.9]	0.20184	NA	NA	1.004	0.3152	+-	1.004	0.3152	+-	NA	NA	NA	0.563	0.5738	+-+-+-+	0.563	0.5738	+-+-+-+	NA	NA	NA
11	ACCSL	3	LOF	-	0.0001	3 (0)	1 (0)	0.71 [0.06-8.59]	0.79432	0.71 [0.06-8.59]	0.79432	NA	NA	-0.21	0.8336	-+	-0.21	0.8336	-+	NA	NA	NA	-0.987	0.3239	?+?-??+	-0.987	0.3239	?+?-??+	NA	NA	NA
11	ACCSL	2	LOF	-	0.001	3 (0)	1 (0)	0.71 [0.06-8.59]	0.79432	0.71 [0.06-8.59]	0.79432	NA	NA	-0.21	0.8336	-+	-0.21	0.8336	-+	NA	NA	NA	-0.987	0.3239	?+?-??+	-0.987	0.3239	?+?-??+	NA	NA	NA
11	ACCSL	1	LOF	-	0.01	41 (0)	8 (0)	1.09 [0.46-2.6]	0.84723	1.09 [0.46-2.6]	0.84723	NA	NA	-0.109	0.913	+-	-0.109	0.913	+-	NA	NA	NA	0.486	0.6267	?+?+-++	0.486	0.6267	?+?+-++	NA	NA	NA
11	ACCSL	6	MISSLOF	TRUE	0.0001	20 (0)	12 (0)	0.64 [0.28-1.5]	0.31283	0.64 [0.28-1.5]	0.31283	NA	NA	-1.242	0.2141	--	-1.242	0.2141	--	NA	NA	NA	-1.076	0.2819	+++--+-	-1.076	0.2819	+++--+-	NA	NA	NA
11	ACCSL	9	MISSLOF	FALSE	0.0001	30 (0)	16 (0)	0.76 [0.37-1.54]	0.44958	0.76 [0.37-1.54]	0.44958	NA	NA	-1.104	0.2698	--	-1.104	0.2698	--	NA	NA	NA	-0.972	0.3312	+-++-+-	-0.972	0.3312	+-++-+-	NA	NA	NA
11	ACCSL	5	MISSLOF	TRUE	0.001	40 (0)	20 (0)	0.66 [0.35-1.23]	0.19756	0.66 [0.35-1.23]	0.19756	NA	NA	-1.587	0.1124	--	-1.587	0.1124	--	NA	NA	NA	-0.98	0.3268	++---+-	-0.98	0.3268	++---+-	NA	NA	NA
11	ACCSL	8	MISSLOF	FALSE	0.001	52 (0)	25 (0)	0.78 [0.45-1.36]	0.38267	0.78 [0.45-1.36]	0.38267	NA	NA	-1.256	0.209	--	-1.256	0.209	--	NA	NA	NA	-0.442	0.6583	++-+-+-	-0.442	0.6583	++-+-+-	NA	NA	NA
11	ACCSL	4	MISSLOF	TRUE	0.01	78 (0)	27 (0)	0.79 [0.47-1.32]	0.37588	0.79 [0.47-1.32]	0.37588	NA	NA	-0.187	0.8518	+-	-0.187	0.8518	+-	NA	NA	NA	0.011	0.9909	++-+-+-	0.011	0.9909	++-+-+-	NA	NA	NA
11	ACCSL	7	MISSLOF	FALSE	0.01	166 (1)	56 (0)	0.98 [0.68-1.4]	0.89451	0.96 [0.67-1.38]	0.82709	86775 [0-3.9874E+172]	0.27369	0.676	0.4991	++	0.748	0.4545	++	1.034	0.3013	+?	0.845	0.3982	++-+-+-	0.769	0.4419	++-+-+-	1.159	0.2465	????+??
16	ACD	3	LOF	-	0.0001	3 (0)	0 (0)	347560 [0-2.3011E+239]	0.12562	347560 [0-2.3011E+239]	0.12562	NA	NA	1.217	0.2235	++	1.217	0.2235	++	NA	NA	NA	1.566	0.1174	?+?++??	1.566	0.1174	?+?++??	NA	NA	NA
16	ACD	2	LOF	-	0.001	3 (0)	0 (0)	347560 [0-2.3011E+239]	0.12562	347560 [0-2.3011E+239]	0.12562	NA	NA	1.217	0.2235	++	1.217	0.2235	++	NA	NA	NA	1.566	0.1174	?+?++??	1.566	0.1174	?+?++??	NA	NA	NA
16	ACD	1	LOF	-	0.01	3 (0)	0 (0)	347560 [0-2.3011E+239]	0.12562	347560 [0-2.3011E+239]	0.12562	NA	NA	1.217	0.2235	++	1.217	0.2235	++	NA	NA	NA	1.566	0.1174	?+?++??	1.566	0.1174	?+?++??	NA	NA	NA
16	ACD	6	MISSLOF	TRUE	0.0001	12 (0)	2 (0)	2.64 [0.53-13.21]	0.20334	2.64 [0.53-13.21]	0.20334	NA	NA	1.171	0.2415	++	1.171	0.2415	++	NA	NA	NA	1.381	0.1673	++?++++	1.381	0.1673	++?++++	NA	NA	NA
16	ACD	9	MISSLOF	FALSE	0.0001	43 (0)	11 (0)	1.33 [0.63-2.8]	0.44998	1.33 [0.63-2.8]	0.44998	NA	NA	0.765	0.4442	++	0.765	0.4442	++	NA	NA	NA	0.728	0.4666	-+?+--+	0.728	0.4666	-+?+--+	NA	NA	NA
16	ACD	5	MISSLOF	TRUE	0.001	15 (0)	3 (0)	2.26 [0.6-8.52]	0.19985	2.26 [0.6-8.52]	0.19985	NA	NA	1.3	0.1938	++	1.3	0.1938	++	NA	NA	NA	1.497	0.1345	++?++++	1.497	0.1345	++?++++	NA	NA	NA
16	ACD	8	MISSLOF	FALSE	0.001	88 (2)	21 (0)	1.49 [0.88-2.53]	0.13041	1.48 [0.86-2.53]	0.14536	53999 [0-2.0888E+185]	0.38207	1.234	0.2171	++	1.169	0.2423	++	0.816	0.4144	+?	1.84	0.0658	-++++-+	1.808	0.07066	-++++-+	1.006	0.3143	????+??
16	ACD	4	MISSLOF	TRUE	0.01	25 (0)	8 (0)	1.33 [0.55-3.2]	0.52538	1.33 [0.55-3.2]	0.52538	NA	NA	1.028	0.3041	+-	1.028	0.3041	+-	NA	NA	NA	1.316	0.1882	++?++++	1.316	0.1882	++?++++	NA	NA	NA
16	ACD	7	MISSLOF	FALSE	0.01	134 (2)	31 (0)	1.52 [0.98-2.36]	0.05291	1.52 [0.97-2.36]	0.05869	53999 [0-2.0888E+185]	0.38207	1.739	0.082	++	1.698	0.08957	++	0.816	0.4144	+?	2.114	0.03449	-++++-+	2.085	0.03708	-++++-+	1.006	0.3143	????+??
17	ACE	3	LOF	-	0.0001	3 (0)	0 (0)	102640 [0-3.3486E+238]	0.34943	102640 [0-3.3486E+238]	0.34943	NA	NA	0.999	0.3179	++	0.999	0.3179	++	NA	NA	NA	0.813	0.4165	?+??+?+	0.813	0.4165	?+??+?+	NA	NA	NA
17	ACE	2	LOF	-	0.001	3 (0)	0 (0)	102640 [0-3.3486E+238]	0.34943	102640 [0-3.3486E+238]	0.34943	NA	NA	0.999	0.3179	++	0.999	0.3179	++	NA	NA	NA	0.813	0.4165	?+??+?+	0.813	0.4165	?+??+?+	NA	NA	NA
17	ACE	1	LOF	-	0.01	3 (0)	0 (0)	102640 [0-3.3486E+238]	0.34943	102640 [0-3.3486E+238]	0.34943	NA	NA	0.999	0.3179	++	0.999	0.3179	++	NA	NA	NA	0.813	0.4165	?+??+?+	0.813	0.4165	?+??+?+	NA	NA	NA
17	ACE	6	MISSLOF	TRUE	0.0001	99 (0)	37 (1)	0.87 [0.57-1.33]	0.52052	0.89 [0.58-1.38]	0.6073	0 [0-2.5978E+162]	0.16099	1.117	0.264	++	0.996	0.3193	++	-1.408	0.1591	-?	-0.351	0.7257	++----+	0.429	0.6678	++-+--+	-1.811	0.07022	???-???
17	ACE	9	MISSLOF	FALSE	0.0001	115 (1)	44 (1)	0.84 [0.57-1.25]	0.39892	0.84 [0.56-1.27]	0.41753	0.56 [0.04-9.04]	0.68757	0.83	0.4065	++	0.798	0.425	++	-0.443	0.6579	-?	-0.354	0.7237	+-+-+-+	-0.346	0.7293	+-+---+	-1.254	0.21	???-+??
17	ACE	5	MISSLOF	TRUE	0.001	222 (2)	89 (1)	0.89 [0.67-1.19]	0.43971	0.88 [0.66-1.19]	0.42138	1.27 [0.08-20.59]	0.86478	1.649	0.0991	++	1.668	0.09535	++	0.141	0.8876	-+	-0.689	0.491	+--+--+	-0.636	0.5246	+--+--+	-0.678	0.4981	???-+??
17	ACE	8	MISSLOF	FALSE	0.001	237 (3)	96 (1)	0.88 [0.67-1.17]	0.38491	0.87 [0.65-1.16]	0.33832	1.98 [0.17-23.65]	0.57739	1.4	0.1615	++	1.474	0.1405	++	-0.176	0.8605	-+	-0.121	0.904	+-+---+	-0.109	0.9134	+-+---+	-0.558	0.5771	???-+??
17	ACE	4	MISSLOF	TRUE	0.01	428 (7)	168 (1)	0.91 [0.73-1.13]	0.39822	0.89 [0.71-1.12]	0.3329	2.7 [0.27-26.88]	0.35851	1.388	0.1651	++	1.473	0.1409	++	0.835	0.4039	++	-0.395	0.6929	+-+--++	-0.465	0.6417	+-+--++	0.653	0.5135	???+++?
17	ACE	7	MISSLOF	FALSE	0.01	517 (11)	192 (1)	0.9 [0.73-1.11]	0.32905	0.88 [0.71-1.09]	0.24619	3.56 [0.39-32.27]	0.19925	0.797	0.4252	+-	0.935	0.35	+-	1.177	0.2394	++	-0.675	0.4996	+-+--+-	-0.807	0.4198	+-+--+-	0.76	0.447	+??++++
X	ACE2	6	MISSLOF	TRUE	0.0001	5 (1)	6 (1)	0.64 [0.21-1.96]	0.43983	0.67 [0.16-2.8]	0.58102	0.22 [0.01-4.71]	0.34726	-0.316	0.7519	+-	-0.339	0.7347	+-	-0.385	0.7006	+-	-0.706	0.4802	?-?-+??	-0.341	0.7331	?-?-+??	-1.162	0.2453	???-+??
X	ACE2	9	MISSLOF	FALSE	0.0001	6 (1)	8 (1)	0.59 [0.22-1.62]	0.30991	0.59 [0.17-2.02]	0.39264	0.22 [0.01-4.71]	0.34726	-0.75	0.4534	--	-0.564	0.573	--	-0.385	0.7006	+-	-0.754	0.4509	?-?-+??	-0.862	0.3887	?-?-+??	-1.162	0.2453	???-+??
X	ACE2	5	MISSLOF	TRUE	0.001	10 (3)	11 (2)	0.41 [0.18-0.94]	0.038985	0.36 [0.11-1.18]	0.085301	0.13 [0.02-0.99]	0.073214	-1.821	0.06862	+-	-1.917	0.05524	+-	-1.174	0.2402	+-	-1.219	0.2227	--?-+??	-0.991	0.3216	--?-+??	-1.515	0.1299	-??-+??
X	ACE2	8	MISSLOF	FALSE	0.001	16 (4)	13 (2)	0.55 [0.27-1.13]	0.11506	0.53 [0.21-1.35]	0.18497	0.22 [0.03-1.43]	0.14421	-1.311	0.1899	+-	-0.995	0.3199	+-	-1.004	0.3155	+-	-0.949	0.3425	--?-+++	-0.709	0.4783	--?-+++	-1.349	0.1773	-??-++?
X	ACE2	4	MISSLOF	TRUE	0.01	19 (7)	17 (4)	0.4 [0.22-0.73]	0.0044256	0.29 [0.11-0.78]	0.011825	0.14 [0.03-0.58]	0.0095958	-3.192	0.001412	--	-3.066	0.002169	--	-0.734	0.4632	+-	-1.735	0.08273	--?-+?-	-1.532	0.1256	--?-+?-	-1.215	0.2244	-+?-+??
X	ACE2	7	MISSLOF	FALSE	0.01	42 (12)	27 (6)	0.71 [0.44-1.13]	0.161	0.77 [0.4-1.48]	0.43936	0.28 [0.09-0.84]	0.028518	-1.222	0.2217	+-	-0.957	0.3388	--	-1.353	0.176	+-	-1.127	0.2598	--?-+--	-1.553	0.1203	--?-+--	0.615	0.5389	-+?+++?
19	ACER1	3	LOF	-	0.0001	5 (0)	0 (0)	121790 [0-3.7631E+194]	0.20267	121790 [0-3.7631E+194]	0.20267	NA	NA	1.241	0.2145	++	1.241	0.2145	++	NA	NA	NA	0.921	0.3569	?+?+?+?	0.921	0.3569	?+?+?+?	NA	NA	NA
19	ACER1	2	LOF	-	0.001	5 (0)	0 (0)	121790 [0-3.7631E+194]	0.20267	121790 [0-3.7631E+194]	0.20267	NA	NA	1.241	0.2145	++	1.241	0.2145	++	NA	NA	NA	0.921	0.3569	?+?+?+?	0.921	0.3569	?+?+?+?	NA	NA	NA
19	ACER1	1	LOF	-	0.01	5 (0)	0 (0)	121790 [0-3.7631E+194]	0.20267	121790 [0-3.7631E+194]	0.20267	NA	NA	1.241	0.2145	++	1.241	0.2145	++	NA	NA	NA	0.921	0.3569	?+?+?+?	0.921	0.3569	?+?+?+?	NA	NA	NA
19	ACER1	6	MISSLOF	TRUE	0.0001	16 (0)	7 (0)	1.08 [0.39-2.99]	0.88429	1.08 [0.39-2.99]	0.88429	NA	NA	0.17	0.865	-+	0.17	0.865	-+	NA	NA	NA	0.729	0.4657	-+?+-++	0.729	0.4657	-+?+-++	NA	NA	NA
19	ACER1	9	MISSLOF	FALSE	0.0001	20 (0)	11 (0)	0.74 [0.32-1.72]	0.48768	0.74 [0.32-1.72]	0.48768	NA	NA	-0.604	0.5457	-+	-0.604	0.5457	-+	NA	NA	NA	-0.356	0.7216	-+?--++	-0.356	0.7216	-+?--++	NA	NA	NA
19	ACER1	5	MISSLOF	TRUE	0.001	26 (0)	9 (0)	1.64 [0.69-3.88]	0.25142	1.64 [0.69-3.88]	0.25142	NA	NA	0.16	0.8727	-+	0.16	0.8727	-+	NA	NA	NA	1.574	0.1154	-+++-++	1.574	0.1154	-+++-++	NA	NA	NA
19	ACER1	8	MISSLOF	FALSE	0.001	31 (0)	14 (0)	1.04 [0.5-2.15]	0.91281	1.04 [0.5-2.15]	0.91281	NA	NA	0.214	0.8308	-+	0.214	0.8308	-+	NA	NA	NA	0.586	0.5581	-+++-++	0.586	0.5581	-+++-++	NA	NA	NA
19	ACER1	4	MISSLOF	TRUE	0.01	94 (2)	33 (0)	1.51 [0.96-2.37]	0.068148	1.5 [0.95-2.36]	0.078426	85593 [0-1.8762E+200]	0.30706	1.81	0.07028	++	1.746	0.08076	++	0.932	0.3512	+?	2.141	0.03228	-+++-++	2.103	0.03549	-+++-++	0.642	0.5208	????++?
19	ACER1	7	MISSLOF	FALSE	0.01	108 (2)	42 (0)	1.32 [0.88-1.98]	0.1775	1.3 [0.86-1.97]	0.20065	85593 [0-1.8762E+200]	0.30706	0.283	0.7773	-+	0.351	0.7256	-+	0.932	0.3512	+?	1.281	0.2001	--++-++	1.244	0.2134	--++-++	0.642	0.5208	????++?
9	ACER2	6	MISSLOF	TRUE	0.0001	12 (0)	4 (0)	1.08 [0.28-4.16]	0.90634	1.08 [0.28-4.16]	0.90634	NA	NA	0.249	0.8033	+-	0.249	0.8033	+-	NA	NA	NA	0.442	0.6588	?+?+++-	0.442	0.6588	?+?+++-	NA	NA	NA
9	ACER2	9	MISSLOF	FALSE	0.0001	15 (0)	5 (0)	0.91 [0.28-3]	0.88337	0.91 [0.28-3]	0.88337	NA	NA	-0.14	0.8883	+-	-0.14	0.8883	+-	NA	NA	NA	0.836	0.4031	?+?+++-	0.836	0.4031	?+?+++-	NA	NA	NA
9	ACER2	5	MISSLOF	TRUE	0.001	12 (0)	4 (0)	1.08 [0.28-4.16]	0.90634	1.08 [0.28-4.16]	0.90634	NA	NA	0.249	0.8033	+-	0.249	0.8033	+-	NA	NA	NA	0.442	0.6588	?+?+++-	0.442	0.6588	?+?+++-	NA	NA	NA
9	ACER2	8	MISSLOF	FALSE	0.001	15 (0)	5 (0)	0.91 [0.28-3]	0.88337	0.91 [0.28-3]	0.88337	NA	NA	-0.14	0.8883	+-	-0.14	0.8883	+-	NA	NA	NA	0.836	0.4031	?+?+++-	0.836	0.4031	?+?+++-	NA	NA	NA
9	ACER2	4	MISSLOF	TRUE	0.01	25 (0)	5 (0)	1.36 [0.45-4.09]	0.57918	1.36 [0.45-4.09]	0.57918	NA	NA	0.528	0.5972	+-	0.528	0.5972	+-	NA	NA	NA	1.028	0.3039	++?+++-	1.028	0.3039	++?+++-	NA	NA	NA
9	ACER2	7	MISSLOF	FALSE	0.01	51 (0)	7 (0)	1.75 [0.71-4.29]	0.20297	1.75 [0.71-4.29]	0.20297	NA	NA	1.239	0.2153	+-	1.239	0.2153	+-	NA	NA	NA	1.544	0.1225	++++++-	1.544	0.1225	++++++-	NA	NA	NA
11	ACER3	6	MISSLOF	TRUE	0.0001	7 (0)	0 (0)	7 [0.23-213.24]	0.12705	7 [0.23-213.24]	0.12705	NA	NA	1.426	0.1538	+?	1.426	0.1538	+?	NA	NA	NA	1.455	0.1457	++++??+	1.455	0.1457	++++??+	NA	NA	NA
11	ACER3	9	MISSLOF	FALSE	0.0001	7 (0)	0 (0)	7 [0.23-213.24]	0.12705	7 [0.23-213.24]	0.12705	NA	NA	1.426	0.1538	+?	1.426	0.1538	+?	NA	NA	NA	1.455	0.1457	++++??+	1.455	0.1457	++++??+	NA	NA	NA
11	ACER3	5	MISSLOF	TRUE	0.001	9 (0)	3 (0)	1.35 [0.28-6.41]	0.70345	1.35 [0.28-6.41]	0.70345	NA	NA	0.516	0.6056	+-	0.516	0.6056	+-	NA	NA	NA	0.084	0.933	+++-??+	0.084	0.933	+++-??+	NA	NA	NA
11	ACER3	8	MISSLOF	FALSE	0.001	11 (0)	5 (0)	0.83 [0.24-2.87]	0.77046	0.83 [0.24-2.87]	0.77046	NA	NA	-0.293	0.7698	+-	-0.293	0.7698	+-	NA	NA	NA	-0.662	0.5078	+++-??-	-0.662	0.5078	+++-??-	NA	NA	NA
11	ACER3	4	MISSLOF	TRUE	0.01	9 (0)	3 (0)	1.35 [0.28-6.41]	0.70345	1.35 [0.28-6.41]	0.70345	NA	NA	0.516	0.6056	+-	0.516	0.6056	+-	NA	NA	NA	0.084	0.933	+++-??+	0.084	0.933	+++-??+	NA	NA	NA
11	ACER3	7	MISSLOF	FALSE	0.01	11 (0)	5 (0)	0.83 [0.24-2.87]	0.77046	0.83 [0.24-2.87]	0.77046	NA	NA	-0.293	0.7698	+-	-0.293	0.7698	+-	NA	NA	NA	-0.662	0.5078	+++-??-	-0.662	0.5078	+++-??-	NA	NA	NA
7	ACHE	6	MISSLOF	TRUE	0.0001	9 (0)	1 (0)	5.77 [0.63-52.87]	0.073096	5.77 [0.63-52.87]	0.073096	NA	NA	1.789	0.07354	++	1.789	0.07354	++	NA	NA	NA	1.892	0.05852	++?++?+	1.892	0.05852	++?++?+	NA	NA	NA
7	ACHE	9	MISSLOF	FALSE	0.0001	24 (0)	7 (0)	1.06 [0.4-2.82]	0.90002	1.06 [0.4-2.82]	0.90002	NA	NA	0.961	0.3365	++	0.961	0.3365	++	NA	NA	NA	0.802	0.4226	++?++--	0.802	0.4226	++?++--	NA	NA	NA
7	ACHE	5	MISSLOF	TRUE	0.001	31 (1)	11 (0)	1.24 [0.58-2.66]	0.56871	1.23 [0.57-2.66]	0.5912	13476 [0-6.1925E+171]	0.62391	0.579	0.5627	++	0.513	0.6081	+-	0.626	0.5314	?+	0.808	0.4193	++?++++	0.658	0.5105	++?+-++	0.618	0.5366	????+??
7	ACHE	8	MISSLOF	FALSE	0.001	51 (1)	20 (0)	0.98 [0.55-1.75]	0.94802	0.97 [0.54-1.75]	0.92032	13476 [0-6.1925E+171]	0.62391	0.071	0.9435	++	0.072	0.9424	++	0.626	0.5314	?+	0.124	0.9014	++?++--	0.174	0.8622	++?++--	0.618	0.5366	????+??
7	ACHE	4	MISSLOF	TRUE	0.01	51 (1)	13 (0)	1.75 [0.9-3.43]	0.088477	1.75 [0.89-3.44]	0.091834	13476 [0-6.1925E+171]	0.62391	1.847	0.06469	++	1.83	0.06726	++	0.626	0.5314	?+	1.576	0.1149	++?++++	1.56	0.1187	++?++++	0.618	0.5366	????+??
7	ACHE	7	MISSLOF	FALSE	0.01	137 (2)	50 (0)	1.03 [0.71-1.5]	0.86715	1.03 [0.71-1.49]	0.89071	24761 [0-3.8834E+195]	0.55802	0.939	0.3478	++	0.93	0.3523	++	0.606	0.5448	++	0.231	0.8172	--?++--	0.202	0.8403	--?++--	0.657	0.511	????+??
14	ACIN1	3	LOF	-	0.0001	3 (0)	0 (0)	221420 [0-1.3287E+234]	0.17971	221420 [0-1.3287E+234]	0.17971	NA	NA	1.297	0.1946	++	1.297	0.1946	++	NA	NA	NA	1.246	0.2126	?+?+???	1.246	0.2126	?+?+???	NA	NA	NA
14	ACIN1	2	LOF	-	0.001	7 (0)	0 (0)	180240 [0-1.3058E+160]	0.069315	180240 [0-1.3058E+160]	0.069315	NA	NA	1.8	0.07191	++	1.8	0.07191	++	NA	NA	NA	1.553	0.1205	++?+?+?	1.553	0.1205	++?+?+?	NA	NA	NA
14	ACIN1	1	LOF	-	0.01	7 (0)	0 (0)	180240 [0-1.3058E+160]	0.069315	180240 [0-1.3058E+160]	0.069315	NA	NA	1.8	0.07191	++	1.8	0.07191	++	NA	NA	NA	1.553	0.1205	++?+?+?	1.553	0.1205	++?+?+?	NA	NA	NA
14	ACIN1	6	MISSLOF	TRUE	0.0001	54 (0)	13 (0)	1.66 [0.84-3.29]	0.13436	1.66 [0.84-3.29]	0.13436	NA	NA	1.478	0.1393	++	1.478	0.1393	++	NA	NA	NA	1.473	0.1408	++-++--	1.473	0.1408	++-++--	NA	NA	NA
14	ACIN1	9	MISSLOF	FALSE	0.0001	71 (0)	21 (0)	1.15 [0.66-1.99]	0.62741	1.15 [0.66-1.99]	0.62741	NA	NA	0.612	0.5407	++	0.612	0.5407	++	NA	NA	NA	0.901	0.3674	++-++--	0.901	0.3674	++-++--	NA	NA	NA
14	ACIN1	5	MISSLOF	TRUE	0.001	86 (0)	23 (0)	1.3 [0.77-2.19]	0.3257	1.3 [0.77-2.19]	0.3257	NA	NA	1.074	0.2827	++	1.074	0.2827	++	NA	NA	NA	0.757	0.4492	++-+---	0.757	0.4492	++-+---	NA	NA	NA
14	ACIN1	8	MISSLOF	FALSE	0.001	125 (0)	40 (0)	1.05 [0.69-1.57]	0.83143	1.05 [0.69-1.57]	0.83143	NA	NA	0.117	0.9071	++	0.117	0.9071	++	NA	NA	NA	0.966	0.3343	++-+---	0.966	0.3343	++-+---	NA	NA	NA
14	ACIN1	4	MISSLOF	TRUE	0.01	184 (1)	65 (0)	0.95 [0.68-1.33]	0.77765	0.94 [0.67-1.32]	0.72293	71019 [0-3.2637E+172]	0.31129	-0.17	0.8653	-+	-0.244	0.8076	-+	0.999	0.3177	+?	-0.211	0.8326	+--++--	-0.211	0.8326	+--++--	NA	NA	NA
14	ACIN1	7	MISSLOF	FALSE	0.01	222 (1)	82 (0)	0.9 [0.66-1.22]	0.49071	0.89 [0.66-1.2]	0.44925	71019 [0-3.2637E+172]	0.31129	-0.873	0.3825	-+	-0.939	0.3477	-+	0.999	0.3177	+?	-1.197	0.2313	+---+--	-1.197	0.2313	+---+--	NA	NA	NA
3	ACKR2	2	LOF	-	0.001	7 (0)	3 (0)	0.5 [0.12-2.14]	0.37024	0.5 [0.12-2.14]	0.37024	NA	NA	-0.565	0.5723	+-	-0.565	0.5723	+-	NA	NA	NA	1.149	0.2506	++?++?-	1.149	0.2506	++?++?-	NA	NA	NA
3	ACKR2	1	LOF	-	0.01	7 (0)	3 (0)	0.5 [0.12-2.14]	0.37024	0.5 [0.12-2.14]	0.37024	NA	NA	-0.565	0.5723	+-	-0.565	0.5723	+-	NA	NA	NA	1.149	0.2506	++?++?-	1.149	0.2506	++?++?-	NA	NA	NA
3	ACKR2	6	MISSLOF	TRUE	0.0001	12 (0)	3 (0)	2.05 [0.47-8.89]	0.31028	2.05 [0.47-8.89]	0.31028	NA	NA	1.054	0.292	++	1.054	0.292	++	NA	NA	NA	0.381	0.7036	???+-+-	0.381	0.7036	???+-+-	NA	NA	NA
3	ACKR2	9	MISSLOF	FALSE	0.0001	32 (0)	4 (0)	2.54 [0.77-8.42]	0.095702	2.54 [0.77-8.42]	0.095702	NA	NA	1.966	0.04933	++	1.966	0.04933	++	NA	NA	NA	2.294	0.02181	++++++-	2.294	0.02181	++++++-	NA	NA	NA
3	ACKR2	5	MISSLOF	TRUE	0.001	36 (1)	13 (0)	1.19 [0.59-2.43]	0.62529	1.16 [0.55-2.41]	0.6978	50913 [0-2.3398E+172]	0.3759	0.63	0.5288	+-	0.553	0.5802	+-	0.823	0.4103	+?	0.736	0.462	++?+-+-	0.641	0.5213	++?+-+-	0.652	0.5143	??????+
3	ACKR2	8	MISSLOF	FALSE	0.001	61 (2)	19 (0)	1.15 [0.64-2.07]	0.64008	1.11 [0.6-2.05]	0.7313	88520 [0-1.0959E+195]	0.29476	0.937	0.3488	+-	0.873	0.3825	+-	0.941	0.3469	+?	0.879	0.3794	+++-++-	0.892	0.3721	+++-++-	0.938	0.3483	?+????+
3	ACKR2	4	MISSLOF	TRUE	0.01	64 (1)	25 (0)	0.98 [0.58-1.66]	0.94135	0.96 [0.56-1.63]	0.86991	50913 [0-2.3398E+172]	0.3759	-0.106	0.9152	+-	-0.026	0.9791	+-	0.823	0.4103	+?	0.554	0.5799	--?+-+-	0.459	0.646	--?+-+-	0.652	0.5143	??????+
3	ACKR2	7	MISSLOF	FALSE	0.01	146 (4)	54 (1)	1.03 [0.72-1.47]	0.89057	1.02 [0.7-1.48]	0.92272	1.36 [0.14-13.15]	0.7877	0.214	0.8303	++	0.221	0.8253	++	0.008	0.9937	+?	0.621	0.5345	-+++-+-	1.077	0.2814	-+++++-	0.688	0.4916	?+??-++
2	ACKR3	6	MISSLOF	TRUE	0.0001	22 (0)	8 (0)	1.16 [0.46-2.96]	0.75173	1.16 [0.46-2.96]	0.75173	NA	NA	0.271	0.7862	-+	0.271	0.7862	-+	NA	NA	NA	0.46	0.6458	?+++-+-	0.46	0.6458	?+++-+-	NA	NA	NA
2	ACKR3	9	MISSLOF	FALSE	0.0001	25 (0)	9 (0)	1.17 [0.47-2.87]	0.73707	1.17 [0.47-2.87]	0.73707	NA	NA	0.867	0.3861	++	0.867	0.3861	++	NA	NA	NA	-0.068	0.9455	?++--+-	-0.068	0.9455	?++--+-	NA	NA	NA
2	ACKR3	5	MISSLOF	TRUE	0.001	38 (0)	13 (0)	0.94 [0.46-1.93]	0.86411	0.94 [0.46-1.93]	0.86411	NA	NA	1.329	0.1839	++	1.329	0.1839	++	NA	NA	NA	-0.479	0.6316	--+--+-	-0.479	0.6316	--+--+-	NA	NA	NA
2	ACKR3	8	MISSLOF	FALSE	0.001	41 (0)	14 (0)	0.95 [0.47-1.92]	0.88626	0.95 [0.47-1.92]	0.88626	NA	NA	1.172	0.241	++	1.172	0.241	++	NA	NA	NA	-0.47	0.6385	--+--+-	-0.47	0.6385	--+--+-	NA	NA	NA
2	ACKR3	4	MISSLOF	TRUE	0.01	58 (0)	27 (0)	0.78 [0.46-1.32]	0.3612	0.78 [0.46-1.32]	0.3612	NA	NA	-0.879	0.3794	--	-0.879	0.3794	--	NA	NA	NA	-0.926	0.3545	--+--+-	-0.926	0.3545	--+--+-	NA	NA	NA
2	ACKR3	7	MISSLOF	FALSE	0.01	129 (1)	46 (0)	1.02 [0.69-1.51]	0.92343	1 [0.68-1.49]	0.9831	63776 [0-2.9305E+172]	0.33092	0.274	0.7838	+-	0.208	0.8354	+-	0.971	0.3317	+?	0.015	0.988	--+-++-	-0.053	0.9577	--+-++-	0.855	0.3923	???+???
3	ACKR4	3	LOF	-	0.0001	4 (0)	0 (0)	224580 [0-4.0361E+226]	0.15003	224580 [0-4.0361E+226]	0.15003	NA	NA	1.345	0.1787	++	1.345	0.1787	++	NA	NA	NA	1.286	0.1984	???++?+	1.286	0.1984	???++?+	NA	NA	NA
3	ACKR4	2	LOF	-	0.001	5 (0)	0 (0)	182690 [0-2.372E+199]	0.13756	182690 [0-2.372E+199]	0.13756	NA	NA	1.413	0.1576	++	1.413	0.1576	++	NA	NA	NA	1.387	0.1655	???++?+	1.387	0.1655	???++?+	NA	NA	NA
3	ACKR4	1	LOF	-	0.01	5 (0)	0 (0)	182690 [0-2.372E+199]	0.13756	182690 [0-2.372E+199]	0.13756	NA	NA	1.413	0.1576	++	1.413	0.1576	++	NA	NA	NA	1.387	0.1655	???++?+	1.387	0.1655	???++?+	NA	NA	NA
3	ACKR4	6	MISSLOF	TRUE	0.0001	16 (0)	4 (0)	1.32 [0.39-4.46]	0.64747	1.32 [0.39-4.46]	0.64747	NA	NA	0.587	0.5569	++	0.587	0.5569	++	NA	NA	NA	0.778	0.4363	?+++-?-	0.778	0.4363	?+++-?-	NA	NA	NA
3	ACKR4	9	MISSLOF	FALSE	0.0001	21 (0)	9 (0)	0.65 [0.27-1.58]	0.34685	0.65 [0.27-1.58]	0.34685	NA	NA	-0.797	0.4252	-+	-0.797	0.4252	-+	NA	NA	NA	-0.578	0.5632	-++--?-	-0.578	0.5632	-++--?-	NA	NA	NA
3	ACKR4	5	MISSLOF	TRUE	0.001	17 (0)	4 (0)	1.35 [0.4-4.52]	0.62311	1.35 [0.4-4.52]	0.62311	NA	NA	0.63	0.5288	++	0.63	0.5288	++	NA	NA	NA	0.838	0.4022	?+++-?-	0.838	0.4022	?+++-?-	NA	NA	NA
3	ACKR4	8	MISSLOF	FALSE	0.001	23 (0)	10 (0)	0.66 [0.28-1.58]	0.36048	0.66 [0.28-1.58]	0.36048	NA	NA	-0.745	0.4563	-+	-0.745	0.4563	-+	NA	NA	NA	-0.564	0.5731	-++--?-	-0.564	0.5731	-++--?-	NA	NA	NA
3	ACKR4	4	MISSLOF	TRUE	0.01	67 (0)	20 (1)	1.06 [0.6-1.85]	0.84608	1.12 [0.63-2]	0.69851	0 [0-2.348E+162]	0.14987	0.6	0.5483	++	0.49	0.6241	++	-1.358	0.1745	-?	-0.015	0.988	-+++-+-	0.09	0.928	++++-+-	-1.346	0.1782	-??????
3	ACKR4	7	MISSLOF	FALSE	0.01	99 (0)	34 (1)	0.97 [0.62-1.51]	0.88538	1 [0.63-1.58]	0.99778	0 [0-2.348E+162]	0.14987	0.022	0.9825	-+	1.518	0.129	++	-1.358	0.1745	-?	-0.205	0.8375	-++--+-	-0.128	0.8982	-++--+-	-1.346	0.1782	-??????
17	ACLY	3	LOF	-	0.0001	3 (0)	0 (0)	332190 [0-2.2915E+228]	0.11058	332190 [0-2.2915E+228]	0.11058	NA	NA	1.561	0.1186	+?	1.561	0.1186	+?	NA	NA	NA	1.495	0.135	???+??+	1.495	0.135	???+??+	NA	NA	NA
17	ACLY	2	LOF	-	0.001	3 (0)	1 (0)	1.56 [0.14-17.28]	0.70868	1.56 [0.14-17.28]	0.70868	NA	NA	0.367	0.7133	+?	0.367	0.7133	+?	NA	NA	NA	1.269	0.2045	??-+??+	1.269	0.2045	??-+??+	NA	NA	NA
17	ACLY	1	LOF	-	0.01	3 (0)	1 (0)	1.56 [0.14-17.28]	0.70868	1.56 [0.14-17.28]	0.70868	NA	NA	0.367	0.7133	+?	0.367	0.7133	+?	NA	NA	NA	1.269	0.2045	??-+??+	1.269	0.2045	??-+??+	NA	NA	NA
17	ACLY	6	MISSLOF	TRUE	0.0001	39 (0)	13 (0)	1.17 [0.58-2.38]	0.6585	1.17 [0.58-2.38]	0.6585	NA	NA	0.495	0.6208	++	0.495	0.6208	++	NA	NA	NA	0.9	0.3681	+--++++	0.9	0.3681	+--++++	NA	NA	NA
17	ACLY	9	MISSLOF	FALSE	0.0001	52 (0)	16 (0)	1.27 [0.68-2.38]	0.44474	1.27 [0.68-2.38]	0.44474	NA	NA	0.968	0.3329	++	0.968	0.3329	++	NA	NA	NA	1.251	0.2111	+--++++	1.251	0.2111	+--++++	NA	NA	NA
17	ACLY	5	MISSLOF	TRUE	0.001	52 (0)	23 (0)	1 [0.57-1.77]	0.99128	1 [0.57-1.77]	0.99128	NA	NA	-0.018	0.9859	-+	-0.018	0.9859	-+	NA	NA	NA	0.187	0.8517	+---++-	0.187	0.8517	+---++-	NA	NA	NA
17	ACLY	8	MISSLOF	FALSE	0.001	65 (0)	26 (0)	1.09 [0.65-1.83]	0.74161	1.09 [0.65-1.83]	0.74161	NA	NA	0.428	0.6684	-+	0.428	0.6684	-+	NA	NA	NA	0.515	0.6069	+---++-	0.515	0.6069	+---++-	NA	NA	NA
17	ACLY	4	MISSLOF	TRUE	0.01	83 (0)	39 (0)	0.97 [0.62-1.52]	0.90308	0.97 [0.62-1.52]	0.90308	NA	NA	-0.076	0.939	--	-0.076	0.939	--	NA	NA	NA	0.325	0.7451	+---++-	0.325	0.7451	+---++-	NA	NA	NA
17	ACLY	7	MISSLOF	FALSE	0.01	96 (0)	42 (0)	1.03 [0.68-1.57]	0.88481	1.03 [0.68-1.57]	0.88481	NA	NA	-0.408	0.6835	--	-0.408	0.6835	--	NA	NA	NA	0.544	0.5866	+---++-	0.544	0.5866	+---++-	NA	NA	NA
2	ACMSD	3	LOF	-	0.0001	7 (0)	0 (0)	223380 [0-1.3374E+159]	0.050918	223380 [0-1.3374E+159]	0.050918	NA	NA	1.915	0.05552	++	1.915	0.05552	++	NA	NA	NA	1.454	0.1458	+??++++	1.454	0.1458	+??++++	NA	NA	NA
2	ACMSD	2	LOF	-	0.001	7 (0)	0 (0)	223380 [0-1.3374E+159]	0.050918	223380 [0-1.3374E+159]	0.050918	NA	NA	1.915	0.05552	++	1.915	0.05552	++	NA	NA	NA	1.454	0.1458	+??++++	1.454	0.1458	+??++++	NA	NA	NA
2	ACMSD	1	LOF	-	0.01	7 (0)	0 (0)	223380 [0-1.3374E+159]	0.050918	223380 [0-1.3374E+159]	0.050918	NA	NA	1.915	0.05552	++	1.915	0.05552	++	NA	NA	NA	1.454	0.1458	+??++++	1.454	0.1458	+??++++	NA	NA	NA
2	ACMSD	6	MISSLOF	TRUE	0.0001	28 (0)	9 (0)	1.45 [0.62-3.43]	0.38532	1.45 [0.62-3.43]	0.38532	NA	NA	1.26	0.2077	++	1.26	0.2077	++	NA	NA	NA	0.689	0.4907	+-?-+++	0.689	0.4907	+-?-+++	NA	NA	NA
2	ACMSD	9	MISSLOF	FALSE	0.0001	30 (0)	10 (0)	1.42 [0.63-3.21]	0.38834	1.42 [0.63-3.21]	0.38834	NA	NA	1.202	0.2294	++	1.202	0.2294	++	NA	NA	NA	0.768	0.4424	+-?-+++	0.768	0.4424	+-?-+++	NA	NA	NA
2	ACMSD	5	MISSLOF	TRUE	0.001	33 (0)	9 (0)	1.53 [0.66-3.56]	0.31451	1.53 [0.66-3.56]	0.31451	NA	NA	1.401	0.1614	++	1.401	0.1614	++	NA	NA	NA	1.064	0.2874	+-?++++	1.064	0.2874	+-?++++	NA	NA	NA
2	ACMSD	8	MISSLOF	FALSE	0.001	62 (0)	14 (0)	1.69 [0.88-3.26]	0.10354	1.69 [0.88-3.26]	0.10354	NA	NA	1.943	0.05202	++	1.943	0.05202	++	NA	NA	NA	1.458	0.1449	+++++-+	1.458	0.1449	+++++-+	NA	NA	NA
2	ACMSD	4	MISSLOF	TRUE	0.01	34 (0)	10 (0)	1.36 [0.6-3.05]	0.45475	1.36 [0.6-3.05]	0.45475	NA	NA	1.119	0.263	++	1.119	0.263	++	NA	NA	NA	0.929	0.3527	+--++++	0.929	0.3527	+--++++	NA	NA	NA
2	ACMSD	7	MISSLOF	FALSE	0.01	63 (0)	15 (0)	1.57 [0.83-2.97]	0.1545	1.57 [0.83-2.97]	0.1545	NA	NA	1.727	0.08417	++	1.727	0.08417	++	NA	NA	NA	1.328	0.1843	++-++-+	1.328	0.1843	++-++-+	NA	NA	NA
7	ACN9	3	LOF	-	0.0001	1 (0)	2 (0)	0.23 [0.02-2.72]	0.22447	0.23 [0.02-2.72]	0.22447	NA	NA	-1.309	0.1906	-+	-1.309	0.1906	-+	NA	NA	NA	-0.195	0.8451	-??+??-	-0.195	0.8451	-??+??-	NA	NA	NA
7	ACN9	2	LOF	-	0.001	1 (0)	3 (0)	0.16 [0.02-1.65]	0.092302	0.16 [0.02-1.65]	0.092302	NA	NA	-1.603	0.1089	-+	-1.603	0.1089	-+	NA	NA	NA	-0.359	0.7197	-??+??-	-0.359	0.7197	-??+??-	NA	NA	NA
7	ACN9	1	LOF	-	0.01	1 (0)	3 (0)	0.16 [0.02-1.65]	0.092302	0.16 [0.02-1.65]	0.092302	NA	NA	-1.603	0.1089	-+	-1.603	0.1089	-+	NA	NA	NA	-0.359	0.7197	-??+??-	-0.359	0.7197	-??+??-	NA	NA	NA
7	ACN9	6	MISSLOF	TRUE	0.0001	1 (0)	2 (0)	0.23 [0.02-2.72]	0.22447	0.23 [0.02-2.72]	0.22447	NA	NA	-1.309	0.1906	-+	-1.309	0.1906	-+	NA	NA	NA	-0.195	0.8451	-??+??-	-0.195	0.8451	-??+??-	NA	NA	NA
7	ACN9	9	MISSLOF	FALSE	0.0001	9 (0)	6 (0)	0.69 [0.2-2.31]	0.54638	0.69 [0.2-2.31]	0.54638	NA	NA	-0.795	0.4268	--	-0.795	0.4268	--	NA	NA	NA	-0.417	0.6765	-+---?-	-0.417	0.6765	-+---?-	NA	NA	NA
7	ACN9	5	MISSLOF	TRUE	0.001	1 (0)	3 (0)	0.16 [0.02-1.65]	0.092302	0.16 [0.02-1.65]	0.092302	NA	NA	-1.603	0.1089	-+	-1.603	0.1089	-+	NA	NA	NA	-0.359	0.7197	-??+??-	-0.359	0.7197	-??+??-	NA	NA	NA
7	ACN9	8	MISSLOF	FALSE	0.001	9 (0)	8 (0)	0.52 [0.17-1.58]	0.24833	0.52 [0.17-1.58]	0.24833	NA	NA	-1.329	0.1837	--	-1.329	0.1837	--	NA	NA	NA	-0.826	0.4088	-+---?-	-0.826	0.4088	-+---?-	NA	NA	NA
7	ACN9	4	MISSLOF	TRUE	0.01	1 (0)	3 (0)	0.16 [0.02-1.65]	0.092302	0.16 [0.02-1.65]	0.092302	NA	NA	-1.603	0.1089	-+	-1.603	0.1089	-+	NA	NA	NA	-0.359	0.7197	-??+??-	-0.359	0.7197	-??+??-	NA	NA	NA
7	ACN9	7	MISSLOF	FALSE	0.01	30 (1)	10 (0)	0.84 [0.37-1.95]	0.69326	0.83 [0.36-1.95]	0.67512	4940.8 [0-2.2707E+171]	0.76231	0.19	0.8495	+-	0.222	0.8245	+-	0.359	0.7198	+?	-0.189	0.8504	-+---+-	-0.203	0.8388	-+---+-	0.23	0.8179	+??????
9	ACO1	3	LOF	-	0.0001	3 (0)	2 (0)	0.72 [0.1-5.39]	0.75516	0.72 [0.1-5.39]	0.75516	NA	NA	-0.451	0.6522	+-	-0.451	0.6522	+-	NA	NA	NA	-0.496	0.6197	?+--+??	-0.496	0.6197	?+--+??	NA	NA	NA
9	ACO1	2	LOF	-	0.001	3 (0)	2 (0)	0.72 [0.1-5.39]	0.75516	0.72 [0.1-5.39]	0.75516	NA	NA	-0.451	0.6522	+-	-0.451	0.6522	+-	NA	NA	NA	-0.496	0.6197	?+--+??	-0.496	0.6197	?+--+??	NA	NA	NA
9	ACO1	1	LOF	-	0.01	3 (0)	2 (0)	0.72 [0.1-5.39]	0.75516	0.72 [0.1-5.39]	0.75516	NA	NA	-0.451	0.6522	+-	-0.451	0.6522	+-	NA	NA	NA	-0.496	0.6197	?+--+??	-0.496	0.6197	?+--+??	NA	NA	NA
9	ACO1	6	MISSLOF	TRUE	0.0001	42 (0)	17 (0)	0.93 [0.48-1.81]	0.83139	0.93 [0.48-1.81]	0.83139	NA	NA	-0.045	0.9642	+-	-0.045	0.9642	+-	NA	NA	NA	0.184	0.854	+----++	0.184	0.854	+----++	NA	NA	NA
9	ACO1	9	MISSLOF	FALSE	0.0001	43 (0)	17 (0)	0.94 [0.48-1.82]	0.85262	0.94 [0.48-1.82]	0.85262	NA	NA	-0.032	0.9746	+-	-0.032	0.9746	+-	NA	NA	NA	0.201	0.8407	+----++	0.201	0.8407	+----++	NA	NA	NA
9	ACO1	5	MISSLOF	TRUE	0.001	62 (0)	34 (0)	0.8 [0.48-1.32]	0.38626	0.8 [0.48-1.32]	0.38626	NA	NA	-0.528	0.5977	--	-0.528	0.5977	--	NA	NA	NA	-0.248	0.8045	+-----+	-0.248	0.8045	+-----+	NA	NA	NA
9	ACO1	8	MISSLOF	FALSE	0.001	63 (0)	34 (0)	0.8 [0.49-1.33]	0.39846	0.8 [0.49-1.33]	0.39846	NA	NA	-0.53	0.5961	--	-0.53	0.5961	--	NA	NA	NA	-0.121	0.9038	++----+	-0.121	0.9038	++----+	NA	NA	NA
9	ACO1	4	MISSLOF	TRUE	0.01	162 (2)	69 (1)	0.71 [0.5-1.01]	0.056433	0.73 [0.51-1.03]	0.077638	0.07 [0.01-1.06]	0.098529	0.564	0.573	+-	0.423	0.6721	+-	-1.532	0.1255	-?	-0.403	0.6868	----+-+	-0.403	0.6868	----+-+	NA	NA	NA
9	ACO1	7	MISSLOF	FALSE	0.01	163 (2)	69 (1)	0.71 [0.5-1.01]	0.058565	0.73 [0.51-1.04]	0.080403	0.07 [0.01-1.06]	0.098529	0.556	0.5783	+-	0.416	0.6778	+-	-1.532	0.1255	-?	-0.393	0.6945	----+-+	-0.393	0.6945	----+-+	NA	NA	NA
22	ACO2	6	MISSLOF	TRUE	0.0001	4 (0)	1 (0)	1.3 [0.12-14.08]	0.82631	1.3 [0.12-14.08]	0.82631	NA	NA	0.167	0.8671	+?	0.167	0.8671	+?	NA	NA	NA	0.397	0.6912	?+?++??	0.397	0.6912	?+?++??	NA	NA	NA
22	ACO2	9	MISSLOF	FALSE	0.0001	21 (0)	4 (0)	1.3 [0.41-4.14]	0.64606	1.3 [0.41-4.14]	0.64606	NA	NA	0.408	0.6831	++	0.408	0.6831	++	NA	NA	NA	1.314	0.1889	++?+-+?	1.314	0.1889	++?+-+?	NA	NA	NA
22	ACO2	5	MISSLOF	TRUE	0.001	4 (0)	1 (0)	1.3 [0.12-14.08]	0.82631	1.3 [0.12-14.08]	0.82631	NA	NA	0.167	0.8671	+?	0.167	0.8671	+?	NA	NA	NA	0.397	0.6912	?+?++??	0.397	0.6912	?+?++??	NA	NA	NA
22	ACO2	8	MISSLOF	FALSE	0.001	27 (0)	5 (0)	1.32 [0.48-3.68]	0.58295	1.32 [0.48-3.68]	0.58295	NA	NA	0.436	0.6628	++	0.436	0.6628	++	NA	NA	NA	0.814	0.4155	++?+-+?	0.814	0.4155	++?+-+?	NA	NA	NA
22	ACO2	4	MISSLOF	TRUE	0.01	4 (0)	1 (0)	1.3 [0.12-14.08]	0.82631	1.3 [0.12-14.08]	0.82631	NA	NA	0.167	0.8671	+?	0.167	0.8671	+?	NA	NA	NA	0.397	0.6912	?+?++??	0.397	0.6912	?+?++??	NA	NA	NA
22	ACO2	7	MISSLOF	FALSE	0.01	35 (0)	13 (0)	1.01 [0.49-2.1]	0.9806	1.01 [0.49-2.1]	0.9806	NA	NA	-0.18	0.8571	-+	-0.18	0.8571	-+	NA	NA	NA	0.598	0.5499	++?--++	0.598	0.5499	++?--++	NA	NA	NA
14	ACOT1	9	MISSLOF	FALSE	0.0001	25 (5)	8 (0)	1.26 [0.55-2.88]	0.57576	1.12 [0.43-2.89]	0.81304	157000 [0-1.5677E+192]	0.15132	0.254	0.7998	-+	0.099	0.9211	-+	0.838	0.4018	++	0.745	0.4561	--+++++	0.325	0.7455	--+-+++	1.47	0.1416	+?++??+
14	ACOT1	8	MISSLOF	FALSE	0.001	28 (5)	8 (0)	1.3 [0.57-2.96]	0.51933	1.17 [0.46-2.98]	0.73404	157000 [0-1.5677E+192]	0.15132	0.395	0.693	++	0.178	0.8589	-+	0.838	0.4018	++	0.918	0.3589	+-+++++	0.426	0.67	--+-+++	1.47	0.1416	+?++??+
14	ACOT1	7	MISSLOF	FALSE	0.01	60 (6)	20 (0)	0.87 [0.51-1.49]	0.61182	0.77 [0.43-1.39]	0.39394	137300 [0-3.8615E+175]	0.13976	0.627	0.5308	++	0.86	0.3897	++	1.019	0.3081	++	-0.15	0.8806	--++-+-	-0.413	0.6795	--++-+-	1.489	0.1364	+?++??+
1	ACOT11	3	LOF	-	0.0001	10 (0)	2 (0)	1.63 [0.33-7.91]	0.52929	1.63 [0.33-7.91]	0.52929	NA	NA	1.303	0.1926	++	1.303	0.1926	++	NA	NA	NA	0.307	0.7586	?-?+++?	0.307	0.7586	?-?+++?	NA	NA	NA
1	ACOT11	2	LOF	-	0.001	11 (0)	2 (0)	1.75 [0.37-8.39]	0.45757	1.75 [0.37-8.39]	0.45757	NA	NA	1.366	0.1719	++	1.366	0.1719	++	NA	NA	NA	0.62	0.5356	?-?+++?	0.62	0.5356	?-?+++?	NA	NA	NA
1	ACOT11	1	LOF	-	0.01	11 (0)	2 (0)	1.75 [0.37-8.39]	0.45757	1.75 [0.37-8.39]	0.45757	NA	NA	1.366	0.1719	++	1.366	0.1719	++	NA	NA	NA	0.62	0.5356	?-?+++?	0.62	0.5356	?-?+++?	NA	NA	NA
1	ACOT11	6	MISSLOF	TRUE	0.0001	58 (1)	12 (0)	1.87 [0.94-3.72]	0.061378	1.87 [0.94-3.72]	0.062192	4646.7 [0-2.1352E+171]	0.76907	1.771	0.07659	++	1.761	0.07831	++	0.293	0.7692	+?	2.196	0.02809	+--++++	2.21	0.0271	+--++++	0.293	0.7692	????+??
1	ACOT11	9	MISSLOF	FALSE	0.0001	60 (1)	12 (0)	1.97 [1-3.91]	0.03879	1.98 [1-3.91]	0.039107	4646.7 [0-2.1352E+171]	0.76907	1.997	0.04585	++	1.988	0.04684	++	0.293	0.7692	+?	2.172	0.02984	+--++++	2.163	0.03053	+--++++	0.293	0.7692	????+??
1	ACOT11	5	MISSLOF	TRUE	0.001	83 (1)	23 (0)	1.33 [0.78-2.25]	0.28137	1.33 [0.78-2.25]	0.28472	4646.7 [0-2.1352E+171]	0.76907	1.246	0.2129	++	1.257	0.2088	++	0.293	0.7692	+?	2.158	0.03096	++-++++	2.174	0.02968	++-++++	0.293	0.7692	????+??
1	ACOT11	8	MISSLOF	FALSE	0.001	85 (1)	23 (0)	1.41 [0.83-2.38]	0.19268	1.41 [0.83-2.38]	0.19504	4646.7 [0-2.1352E+171]	0.76907	1.252	0.2107	++	1.241	0.2145	++	0.293	0.7692	+?	2.045	0.04088	++-++++	2.056	0.03975	++-++++	0.293	0.7692	????+??
1	ACOT11	4	MISSLOF	TRUE	0.01	137 (1)	54 (0)	1.01 [0.7-1.47]	0.94615	1.01 [0.7-1.47]	0.95242	4646.7 [0-2.1352E+171]	0.76907	0.081	0.9351	-+	0.071	0.9431	-+	0.293	0.7692	+?	1.004	0.3154	+--++++	1.018	0.3087	+--++++	0.293	0.7692	????+??
1	ACOT11	7	MISSLOF	FALSE	0.01	139 (1)	54 (0)	1.05 [0.72-1.52]	0.81147	1.04 [0.72-1.52]	0.81729	4646.7 [0-2.1352E+171]	0.76907	0.233	0.8157	-+	0.223	0.8232	-+	0.293	0.7692	+?	0.896	0.3701	+--++++	0.907	0.3646	+--++++	0.293	0.7692	????+??
5	ACOT12	3	LOF	-	0.0001	7 (0)	3 (0)	0.9 [0.2-4.01]	0.8882	0.9 [0.2-4.01]	0.8882	NA	NA	-0.383	0.7019	-+	-0.383	0.7019	-+	NA	NA	NA	-0.107	0.9147	?-?+-+?	-0.107	0.9147	?-?+-+?	NA	NA	NA
5	ACOT12	2	LOF	-	0.001	8 (0)	3 (0)	0.91 [0.2-4.03]	0.90037	0.91 [0.2-4.03]	0.90037	NA	NA	-0.344	0.7309	-+	-0.344	0.7309	-+	NA	NA	NA	-0.052	0.9585	?-?+-++	-0.052	0.9585	?-?+-++	NA	NA	NA
5	ACOT12	1	LOF	-	0.01	8 (0)	3 (0)	0.91 [0.2-4.03]	0.90037	0.91 [0.2-4.03]	0.90037	NA	NA	-0.344	0.7309	-+	-0.344	0.7309	-+	NA	NA	NA	-0.052	0.9585	?-?+-++	-0.052	0.9585	?-?+-++	NA	NA	NA
5	ACOT12	6	MISSLOF	TRUE	0.0001	32 (0)	8 (0)	1.56 [0.66-3.7]	0.29549	1.56 [0.66-3.7]	0.29549	NA	NA	1.639	0.1012	++	1.639	0.1012	++	NA	NA	NA	1.088	0.2768	?+-++++	1.088	0.2768	?+-++++	NA	NA	NA
5	ACOT12	9	MISSLOF	FALSE	0.0001	47 (0)	15 (0)	1.19 [0.62-2.29]	0.60069	1.19 [0.62-2.29]	0.60069	NA	NA	0.461	0.6448	++	0.461	0.6448	++	NA	NA	NA	0.822	0.411	--+++++	0.822	0.411	--+++++	NA	NA	NA
5	ACOT12	5	MISSLOF	TRUE	0.001	50 (0)	11 (0)	1.56 [0.75-3.24]	0.22164	1.56 [0.75-3.24]	0.22164	NA	NA	1.556	0.1196	++	1.556	0.1196	++	NA	NA	NA	1.19	0.234	++-++++	1.19	0.234	++-++++	NA	NA	NA
5	ACOT12	8	MISSLOF	FALSE	0.001	68 (0)	18 (0)	1.27 [0.7-2.28]	0.42508	1.27 [0.7-2.28]	0.42508	NA	NA	0.74	0.4593	++	0.74	0.4593	++	NA	NA	NA	1.108	0.2677	-++++++	1.108	0.2677	-++++++	NA	NA	NA
5	ACOT12	4	MISSLOF	TRUE	0.01	97 (0)	31 (0)	1.36 [0.86-2.17]	0.18407	1.36 [0.86-2.17]	0.18407	NA	NA	1.479	0.1392	+-	1.479	0.1392	+-	NA	NA	NA	1.429	0.1531	++--+++	1.429	0.1531	++--+++	NA	NA	NA
5	ACOT12	7	MISSLOF	FALSE	0.01	120 (0)	44 (0)	1.12 [0.75-1.68]	0.56551	1.12 [0.75-1.68]	0.56551	NA	NA	0.49	0.6242	++	0.49	0.6242	++	NA	NA	NA	0.882	0.3777	--+-+++	0.882	0.3777	--+-+++	NA	NA	NA
6	ACOT13	2	LOF	-	0.001	10 (0)	3 (0)	1.6 [0.36-7.03]	0.52243	1.6 [0.36-7.03]	0.52243	NA	NA	1.16	0.246	+-	1.16	0.246	+-	NA	NA	NA	0.619	0.536	???-+?+	0.619	0.536	???-+?+	NA	NA	NA
6	ACOT13	1	LOF	-	0.01	10 (0)	3 (0)	1.6 [0.36-7.03]	0.52243	1.6 [0.36-7.03]	0.52243	NA	NA	1.16	0.246	+-	1.16	0.246	+-	NA	NA	NA	0.619	0.536	???-+?+	0.619	0.536	???-+?+	NA	NA	NA
6	ACOT13	6	MISSLOF	TRUE	0.0001	18 (0)	9 (0)	1.12 [0.47-2.66]	0.80215	1.12 [0.47-2.66]	0.80215	NA	NA	0.528	0.5977	+-	0.528	0.5977	+-	NA	NA	NA	0.372	0.7101	+--+-+?	0.372	0.7101	+--+-+?	NA	NA	NA
6	ACOT13	9	MISSLOF	FALSE	0.0001	18 (0)	9 (0)	1.12 [0.47-2.66]	0.80215	1.12 [0.47-2.66]	0.80215	NA	NA	0.528	0.5977	+-	0.528	0.5977	+-	NA	NA	NA	0.372	0.7101	+--+-+?	0.372	0.7101	+--+-+?	NA	NA	NA
6	ACOT13	5	MISSLOF	TRUE	0.001	44 (0)	12 (0)	1.67 [0.82-3.41]	0.14301	1.67 [0.82-3.41]	0.14301	NA	NA	1.648	0.09932	+-	1.648	0.09932	+-	NA	NA	NA	1.238	0.2156	---++++	1.238	0.2156	---++++	NA	NA	NA
6	ACOT13	8	MISSLOF	FALSE	0.001	44 (0)	12 (0)	1.67 [0.82-3.41]	0.14301	1.67 [0.82-3.41]	0.14301	NA	NA	1.648	0.09932	+-	1.648	0.09932	+-	NA	NA	NA	1.238	0.2156	---++++	1.238	0.2156	---++++	NA	NA	NA
6	ACOT13	4	MISSLOF	TRUE	0.01	44 (0)	12 (0)	1.67 [0.82-3.41]	0.14301	1.67 [0.82-3.41]	0.14301	NA	NA	1.648	0.09932	+-	1.648	0.09932	+-	NA	NA	NA	1.238	0.2156	---++++	1.238	0.2156	---++++	NA	NA	NA
6	ACOT13	7	MISSLOF	FALSE	0.01	66 (0)	14 (0)	1.83 [0.96-3.48]	0.054337	1.83 [0.96-3.48]	0.054337	NA	NA	2.089	0.03672	+-	2.089	0.03672	+-	NA	NA	NA	1.752	0.07981	+--++++	1.752	0.07981	+--++++	NA	NA	NA
14	ACOT2	2	LOF	-	0.001	3 (0)	1 (0)	1.27 [0.12-13.99]	0.8427	1.27 [0.12-13.99]	0.8427	NA	NA	0.235	0.8141	-+	0.235	0.8141	-+	NA	NA	NA	0.869	0.385	+??+??-	0.869	0.385	+??+??-	NA	NA	NA
14	ACOT2	1	LOF	-	0.01	3 (0)	1 (0)	1.27 [0.12-13.99]	0.8427	1.27 [0.12-13.99]	0.8427	NA	NA	0.235	0.8141	-+	0.235	0.8141	-+	NA	NA	NA	0.869	0.385	+??+??-	0.869	0.385	+??+??-	NA	NA	NA
14	ACOT2	6	MISSLOF	TRUE	0.0001	14 (0)	11 (0)	0.44 [0.19-1.06]	0.071259	0.44 [0.19-1.06]	0.071259	NA	NA	-1.377	0.1686	-+	-1.377	0.1686	-+	NA	NA	NA	-1.643	0.1004	-?+--+?	-1.643	0.1004	-?+--+?	NA	NA	NA
14	ACOT2	9	MISSLOF	FALSE	0.0001	38 (0)	18 (0)	0.81 [0.42-1.56]	0.53767	0.81 [0.42-1.56]	0.53767	NA	NA	-0.579	0.5626	-+	-0.579	0.5626	-+	NA	NA	NA	-0.153	0.8781	-++--++	-0.153	0.8781	-++--++	NA	NA	NA
14	ACOT2	5	MISSLOF	TRUE	0.001	20 (0)	12 (0)	0.51 [0.23-1.15]	0.11131	0.51 [0.23-1.15]	0.11131	NA	NA	-1.137	0.2557	-+	-1.137	0.2557	-+	NA	NA	NA	-1.48	0.1388	-?+--+-	-1.48	0.1388	-?+--+-	NA	NA	NA
14	ACOT2	8	MISSLOF	FALSE	0.001	53 (0)	21 (0)	0.92 [0.5-1.67]	0.77614	0.92 [0.5-1.67]	0.77614	NA	NA	0.608	0.5435	++	0.608	0.5435	++	NA	NA	NA	0.476	0.6341	-++--+-	0.476	0.6341	-++--+-	NA	NA	NA
14	ACOT2	4	MISSLOF	TRUE	0.01	20 (0)	12 (0)	0.51 [0.23-1.15]	0.11131	0.51 [0.23-1.15]	0.11131	NA	NA	-1.137	0.2557	-+	-1.137	0.2557	-+	NA	NA	NA	-1.48	0.1388	-?+--+-	-1.48	0.1388	-?+--+-	NA	NA	NA
14	ACOT2	7	MISSLOF	FALSE	0.01	120 (1)	50 (1)	0.88 [0.6-1.29]	0.52132	0.88 [0.6-1.3]	0.52042	0.85 [0.03-20.78]	0.91882	0.59	0.5553	++	0.58	0.5616	++	-0.195	0.8454	-?	0.189	0.85	--++++-	0.295	0.7677	--++++-	-0.487	0.6265	???-+??
14	ACOT4	3	LOF	-	0.0001	7 (0)	0 (0)	221520 [0-6.4915E+155]	0.066034	221520 [0-6.4915E+155]	0.066034	NA	NA	1.761	0.07819	+?	1.761	0.07819	+?	NA	NA	NA	1.793	0.07304	++++?+?	1.793	0.07304	++++?+?	NA	NA	NA
14	ACOT4	2	LOF	-	0.001	11 (0)	0 (0)	9.51 [0.35-259.63]	0.057788	9.51 [0.35-259.63]	0.057788	NA	NA	1.646	0.09973	++	1.646	0.09973	++	NA	NA	NA	2.153	0.03135	++++++?	2.153	0.03135	++++++?	NA	NA	NA
14	ACOT4	1	LOF	-	0.01	11 (0)	0 (0)	9.51 [0.35-259.63]	0.057788	9.51 [0.35-259.63]	0.057788	NA	NA	1.646	0.09973	++	1.646	0.09973	++	NA	NA	NA	2.153	0.03135	++++++?	2.153	0.03135	++++++?	NA	NA	NA
14	ACOT4	6	MISSLOF	TRUE	0.0001	27 (0)	15 (0)	0.72 [0.34-1.53]	0.3973	0.72 [0.34-1.53]	0.3973	NA	NA	-0.946	0.3439	+-	-0.946	0.3439	+-	NA	NA	NA	-0.954	0.34	--+--+-	-0.954	0.34	--+--+-	NA	NA	NA
14	ACOT4	9	MISSLOF	FALSE	0.0001	31 (0)	15 (0)	0.77 [0.37-1.61]	0.49084	0.77 [0.37-1.61]	0.49084	NA	NA	-0.695	0.4872	+-	-0.695	0.4872	+-	NA	NA	NA	-0.2	0.8417	-++--+-	-0.2	0.8417	-++--+-	NA	NA	NA
14	ACOT4	5	MISSLOF	TRUE	0.001	43 (0)	22 (0)	0.69 [0.37-1.27]	0.23405	0.69 [0.37-1.27]	0.23405	NA	NA	-1.14	0.2541	+-	-1.14	0.2541	+-	NA	NA	NA	-0.754	0.4505	--+--+-	-0.754	0.4505	--+--+-	NA	NA	NA
14	ACOT4	8	MISSLOF	FALSE	0.001	55 (0)	22 (0)	0.79 [0.44-1.42]	0.43878	0.79 [0.44-1.42]	0.43878	NA	NA	-0.815	0.4153	+-	-0.815	0.4153	+-	NA	NA	NA	0.086	0.9316	-++--+-	0.086	0.9316	-++--+-	NA	NA	NA
14	ACOT4	4	MISSLOF	TRUE	0.01	61 (0)	32 (0)	0.62 [0.37-1.05]	0.077586	0.62 [0.37-1.05]	0.077586	NA	NA	-1.919	0.05497	--	-1.919	0.05497	--	NA	NA	NA	-1.383	0.1667	-----+-	-1.383	0.1667	-----+-	NA	NA	NA
14	ACOT4	7	MISSLOF	FALSE	0.01	73 (0)	32 (0)	0.7 [0.42-1.15]	0.16349	0.7 [0.42-1.15]	0.16349	NA	NA	-0.749	0.4541	+-	-0.749	0.4541	+-	NA	NA	NA	-1.087	0.2769	+----+-	-1.087	0.2769	+----+-	NA	NA	NA
14	ACOT6	6	MISSLOF	TRUE	0.0001	1 (0)	2 (0)	0.58 [0.05-6.98]	0.66083	0.58 [0.05-6.98]	0.66083	NA	NA	-0.615	0.5382	--	-0.615	0.5382	--	NA	NA	NA	-0.195	0.8451	???-???	-0.195	0.8451	???-???	NA	NA	NA
14	ACOT6	9	MISSLOF	FALSE	0.0001	11 (0)	4 (0)	2.32 [0.6-9.01]	0.20915	2.32 [0.6-9.01]	0.20915	NA	NA	0.864	0.3877	+-	0.864	0.3877	+-	NA	NA	NA	-0.247	0.8051	+?+-++?	-0.247	0.8051	+?+-++?	NA	NA	NA
14	ACOT6	5	MISSLOF	TRUE	0.001	1 (0)	2 (0)	0.58 [0.05-6.98]	0.66083	0.58 [0.05-6.98]	0.66083	NA	NA	-0.615	0.5382	--	-0.615	0.5382	--	NA	NA	NA	-0.195	0.8451	???-???	-0.195	0.8451	???-???	NA	NA	NA
14	ACOT6	8	MISSLOF	FALSE	0.001	14 (0)	7 (0)	1.2 [0.4-3.57]	0.74292	1.2 [0.4-3.57]	0.74292	NA	NA	0.332	0.74	+-	0.332	0.74	+-	NA	NA	NA	0.111	0.9113	-?+-+++	0.111	0.9113	-?+-+++	NA	NA	NA
14	ACOT6	4	MISSLOF	TRUE	0.01	1 (0)	2 (0)	0.58 [0.05-6.98]	0.66083	0.58 [0.05-6.98]	0.66083	NA	NA	-0.615	0.5382	--	-0.615	0.5382	--	NA	NA	NA	-0.195	0.8451	???-???	-0.195	0.8451	???-???	NA	NA	NA
14	ACOT6	7	MISSLOF	FALSE	0.01	52 (1)	27 (0)	0.56 [0.32-0.97]	0.040308	0.53 [0.3-0.93]	0.028844	38642 [0-1.7756E+172]	0.42956	-1.814	0.06965	--	-1.928	0.05387	--	0.765	0.4442	+?	-0.88	0.3787	--+--++	-0.96	0.337	--+--++	0.82	0.4125	?+?????
1	ACOT7	6	MISSLOF	TRUE	0.0001	11 (0)	9 (0)	0.27 [0.09-0.8]	0.020281	0.27 [0.09-0.8]	0.020281	NA	NA	-2.212	0.02698	-+	-2.212	0.02698	-+	NA	NA	NA	-1.756	0.07906	-----+-	-1.756	0.07906	-----+-	NA	NA	NA
1	ACOT7	9	MISSLOF	FALSE	0.0001	20 (0)	11 (0)	0.64 [0.27-1.55]	0.33224	0.64 [0.27-1.55]	0.33224	NA	NA	-0.989	0.3227	-+	-0.989	0.3227	-+	NA	NA	NA	-1.112	0.2663	----++-	-1.112	0.2663	----++-	NA	NA	NA
1	ACOT7	5	MISSLOF	TRUE	0.001	12 (0)	9 (0)	0.34 [0.12-1]	0.054902	0.34 [0.12-1]	0.054902	NA	NA	-1.863	0.06249	-+	-1.863	0.06249	-+	NA	NA	NA	-1.516	0.1295	---+-+-	-1.516	0.1295	---+-+-	NA	NA	NA
1	ACOT7	8	MISSLOF	FALSE	0.001	26 (0)	16 (0)	0.66 [0.32-1.37]	0.26921	0.66 [0.32-1.37]	0.26921	NA	NA	-1.071	0.2844	--	-1.071	0.2844	--	NA	NA	NA	-1.032	0.302	----++-	-1.032	0.302	----++-	NA	NA	NA
1	ACOT7	4	MISSLOF	TRUE	0.01	12 (0)	9 (0)	0.34 [0.12-1]	0.054902	0.34 [0.12-1]	0.054902	NA	NA	-1.863	0.06249	-+	-1.863	0.06249	-+	NA	NA	NA	-1.516	0.1295	---+-+-	-1.516	0.1295	---+-+-	NA	NA	NA
1	ACOT7	7	MISSLOF	FALSE	0.01	26 (0)	16 (0)	0.66 [0.32-1.37]	0.26921	0.66 [0.32-1.37]	0.26921	NA	NA	-1.071	0.2844	--	-1.071	0.2844	--	NA	NA	NA	-1.032	0.302	----++-	-1.032	0.302	----++-	NA	NA	NA
20	ACOT8	3	LOF	-	0.0001	1 (0)	2 (0)	0.4 [0.04-4.56]	0.44714	0.4 [0.04-4.56]	0.44714	NA	NA	-0.788	0.4305	-?	-0.788	0.4305	-?	NA	NA	NA	-1.031	0.3024	?-?-???	-1.031	0.3024	?-?-???	NA	NA	NA
20	ACOT8	2	LOF	-	0.001	4 (0)	5 (0)	0.41 [0.1-1.72]	0.2204	0.41 [0.1-1.72]	0.2204	NA	NA	-1.234	0.2171	--	-1.234	0.2171	--	NA	NA	NA	-1.117	0.2638	?-?-???	-1.117	0.2638	?-?-???	NA	NA	NA
20	ACOT8	1	LOF	-	0.01	4 (0)	5 (0)	0.41 [0.1-1.72]	0.2204	0.41 [0.1-1.72]	0.2204	NA	NA	-1.234	0.2171	--	-1.234	0.2171	--	NA	NA	NA	-1.117	0.2638	?-?-???	-1.117	0.2638	?-?-???	NA	NA	NA
20	ACOT8	6	MISSLOF	TRUE	0.0001	18 (0)	6 (0)	1.54 [0.52-4.56]	0.42632	1.54 [0.52-4.56]	0.42632	NA	NA	0.995	0.3197	++	0.995	0.3197	++	NA	NA	NA	0.611	0.5411	?-++-++	0.611	0.5411	?-++-++	NA	NA	NA
20	ACOT8	9	MISSLOF	FALSE	0.0001	19 (0)	6 (0)	1.55 [0.52-4.58]	0.4166	1.55 [0.52-4.58]	0.4166	NA	NA	1.013	0.3111	++	1.013	0.3111	++	NA	NA	NA	0.596	0.5515	?-++-++	0.596	0.5515	?-++-++	NA	NA	NA
20	ACOT8	5	MISSLOF	TRUE	0.001	47 (1)	16 (0)	1.04 [0.54-1.99]	0.90664	1.03 [0.54-1.99]	0.92355	7638.1 [0-3.5098E+171]	0.70849	0.647	0.5177	++	0.671	0.5024	++	0.37	0.7115	+?	0.187	0.852	+-+-+++	0.187	0.852	+-+-+++	0.084	0.9329	?????+?
20	ACOT8	8	MISSLOF	FALSE	0.001	50 (1)	17 (0)	1.03 [0.55-1.94]	0.9263	1.02 [0.54-1.94]	0.94311	7638.1 [0-3.5098E+171]	0.70849	0.737	0.4612	++	0.761	0.4467	++	0.37	0.7115	+?	0.156	0.8761	+-+-+++	0.156	0.8761	+-+-+++	0.084	0.9329	?????+?
20	ACOT8	4	MISSLOF	TRUE	0.01	106 (1)	39 (0)	1.29 [0.84-1.96]	0.23751	1.28 [0.84-1.96]	0.24157	7638.1 [0-3.5098E+171]	0.70849	1.427	0.1536	++	1.417	0.1565	++	0.37	0.7115	+?	1.727	0.08422	+-+++++	1.727	0.08422	+-+++++	0.084	0.9329	?????+?
20	ACOT8	7	MISSLOF	FALSE	0.01	119 (1)	40 (0)	1.39 [0.92-2.09]	0.11208	1.39 [0.92-2.09]	0.11409	7638.1 [0-3.5098E+171]	0.70849	1.799	0.07202	++	1.791	0.07336	++	0.37	0.7115	+?	2.127	0.03339	+-+++++	2.127	0.03339	+-+++++	0.084	0.9329	?????+?
X	ACOT9	3	LOF	-	0.0001	3 (1)	0 (0)	40389 [0-1.6898E+239]	0.22779	124030 [0-6.3233E+193]	0.22779	77329 [0-3.5533E+172]	0.29469	1.094	0.2742	+?	1.094	0.2742	+?	0.974	0.3302	+?	1.203	0.2289	?+??+??	1.203	0.2289	?+??+??	1.047	0.295	????+??
X	ACOT9	2	LOF	-	0.001	3 (1)	0 (0)	40389 [0-1.6898E+239]	0.22779	124030 [0-6.3233E+193]	0.22779	77329 [0-3.5533E+172]	0.29469	1.094	0.2742	+?	1.094	0.2742	+?	0.974	0.3302	+?	1.203	0.2289	?+??+??	1.203	0.2289	?+??+??	1.047	0.295	????+??
X	ACOT9	1	LOF	-	0.01	3 (1)	0 (0)	40389 [0-1.6898E+239]	0.22779	124030 [0-6.3233E+193]	0.22779	77329 [0-3.5533E+172]	0.29469	1.094	0.2742	+?	1.094	0.2742	+?	0.974	0.3302	+?	1.203	0.2289	?+??+??	1.203	0.2289	?+??+??	1.047	0.295	????+??
X	ACOT9	6	MISSLOF	TRUE	0.0001	21 (8)	12 (3)	0.77 [0.41-1.45]	0.4224	0.67 [0.24-1.85]	0.44168	0.59 [0.14-2.49]	0.48868	-1.085	0.2779	--	-1.039	0.2989	--	-0.429	0.6683	-+	-0.793	0.4279	-+?--+?	-0.734	0.4627	-+?--+?	0.377	0.7062	-+?+-+?
X	ACOT9	9	MISSLOF	FALSE	0.0001	23 (9)	14 (3)	0.76 [0.41-1.38]	0.37284	0.62 [0.24-1.6]	0.32365	0.66 [0.16-2.69]	0.57466	-0.893	0.3717	--	-0.956	0.3392	--	-0.315	0.753	-+	-0.458	0.6467	-+?--+?	-0.6	0.5487	-+?--+?	0.435	0.6636	-+?+-+?
X	ACOT9	5	MISSLOF	TRUE	0.001	45 (16)	15 (3)	0.99 [0.57-1.71]	0.974	0.99 [0.45-2.18]	0.98202	0.97 [0.26-3.63]	0.96751	0.846	0.3976	++	-0.009	0.9927	+-	0.505	0.6138	++	0.573	0.5664	-+++--?	-1.072	0.2835	--+---?	0.91	0.3628	-+?+-+?
X	ACOT9	8	MISSLOF	FALSE	0.001	47 (17)	18 (3)	0.94 [0.56-1.57]	0.80175	0.86 [0.41-1.8]	0.69812	1.04 [0.28-3.82]	0.95551	0.797	0.4253	++	-0.955	0.3397	--	0.427	0.6696	++	-0.706	0.4802	-++---?	-0.634	0.526	--+---?	0.963	0.3355	-+?+-+?
X	ACOT9	4	MISSLOF	TRUE	0.01	79 (29)	24 (4)	1.15 [0.75-1.78]	0.5168	1.15 [0.63-2.11]	0.64805	1.55 [0.51-4.68]	0.42123	0.678	0.4977	+-	0.259	0.7956	+-	1.396	0.1626	++	0.664	0.5065	-+++--+	-0.636	0.5249	--+---+	0.991	0.3215	-+?+-++
X	ACOT9	7	MISSLOF	FALSE	0.01	81 (30)	27 (4)	1.1 [0.73-1.67]	0.64684	1.05 [0.59-1.87]	0.87829	1.6 [0.53-4.8]	0.38481	0.455	0.6489	+-	0.185	0.8536	+-	1.445	0.1485	++	0.517	0.6052	-+++-++	-0.365	0.7152	--+---+	1.03	0.3029	-+?+-++
17	ACOX1	6	MISSLOF	TRUE	0.0001	28 (0)	8 (0)	1.59 [0.62-4.09]	0.32775	1.59 [0.62-4.09]	0.32775	NA	NA	0.986	0.3242	++	0.986	0.3242	++	NA	NA	NA	0.602	0.5475	+-+-+++	0.602	0.5475	+-+-+++	NA	NA	NA
17	ACOX1	9	MISSLOF	FALSE	0.0001	33 (0)	12 (0)	1.33 [0.6-2.93]	0.48136	1.33 [0.6-2.93]	0.48136	NA	NA	0.731	0.4649	++	0.731	0.4649	++	NA	NA	NA	0.668	0.5039	+-+-+++	0.668	0.5039	+-+-+++	NA	NA	NA
17	ACOX1	5	MISSLOF	TRUE	0.001	50 (2)	11 (0)	1.88 [0.88-4.01]	0.089818	1.87 [0.87-4.04]	0.096427	32796 [0-5.2804E+194]	0.5023	1.904	0.05687	++	1.871	0.06135	++	0.689	0.4906	+?	1.389	0.1647	+-+++++	1.389	0.1647	+-+++++	0.469	0.6389	+????+?
17	ACOX1	8	MISSLOF	FALSE	0.001	56 (2)	16 (0)	1.47 [0.77-2.81]	0.23702	1.46 [0.75-2.82]	0.25391	32796 [0-5.2804E+194]	0.5023	1.343	0.1791	++	1.294	0.1958	++	0.689	0.4906	+?	0.928	0.3534	+-++++-	0.928	0.3534	+-++++-	0.469	0.6389	+????+?
17	ACOX1	4	MISSLOF	TRUE	0.01	154 (4)	38 (0)	1.22 [0.81-1.84]	0.33208	1.21 [0.8-1.83]	0.37237	104160 [0-1.9976E+229]	0.31116	1.364	0.1725	++	1.272	0.2032	++	1.021	0.3072	+?	0.518	0.6043	+-+++++	0.605	0.5453	+-+++++	0.904	0.3661	+??+?+?
17	ACOX1	7	MISSLOF	FALSE	0.01	180 (5)	45 (0)	1.17 [0.8-1.72]	0.40537	1.16 [0.79-1.7]	0.45697	95027 [0-1.8749E+205]	0.27777	1.258	0.2084	++	1.231	0.2182	++	1.091	0.2751	+?	0.176	0.8605	+-++++-	0.264	0.7921	+-++++-	0.926	0.3545	+??+?+?
3	ACOX2	1	LOF	-	0.01	9 (0)	5 (0)	0.5 [0.14-1.85]	0.31523	0.5 [0.14-1.85]	0.31523	NA	NA	-1.009	0.3129	--	-1.009	0.3129	--	NA	NA	NA	-0.394	0.6933	?+?-+?-	-0.394	0.6933	?+?-+?-	NA	NA	NA
3	ACOX2	6	MISSLOF	TRUE	0.0001	9 (0)	3 (0)	0.82 [0.16-4.2]	0.8165	0.82 [0.16-4.2]	0.8165	NA	NA	-0.092	0.9271	+-	-0.092	0.9271	+-	NA	NA	NA	0.79	0.4297	++?++?-	0.79	0.4297	++?++?-	NA	NA	NA
3	ACOX2	9	MISSLOF	FALSE	0.0001	43 (0)	16 (0)	0.92 [0.47-1.79]	0.80955	0.92 [0.47-1.79]	0.80955	NA	NA	0.691	0.4896	++	0.691	0.4896	++	NA	NA	NA	0.464	0.6426	-++++?-	0.464	0.6426	-++++?-	NA	NA	NA
3	ACOX2	5	MISSLOF	TRUE	0.001	19 (0)	10 (0)	1.23 [0.51-2.96]	0.64564	1.23 [0.51-2.96]	0.64564	NA	NA	-0.418	0.6763	--	-0.418	0.6763	--	NA	NA	NA	0.738	0.4607	++?-+?-	0.738	0.4607	++?-+?-	NA	NA	NA
3	ACOX2	8	MISSLOF	FALSE	0.001	88 (1)	37 (0)	0.96 [0.62-1.5]	0.86857	0.94 [0.6-1.48]	0.80544	53952 [0-2.4791E+172]	0.36356	-0.102	0.9188	-+	-0.18	0.8568	-+	0.842	0.3998	+?	0.132	0.8947	+---+++	0.105	0.9161	+---+++	0.902	0.3672	????+??
3	ACOX2	4	MISSLOF	TRUE	0.01	27 (0)	14 (0)	1.07 [0.51-2.28]	0.85204	1.07 [0.51-2.28]	0.85204	NA	NA	-0.306	0.7593	--	-0.306	0.7593	--	NA	NA	NA	1.019	0.3082	++?-+?-	1.019	0.3082	++?-+?-	NA	NA	NA
3	ACOX2	7	MISSLOF	FALSE	0.01	121 (1)	43 (0)	1.04 [0.69-1.55]	0.8658	1.02 [0.68-1.54]	0.91962	53952 [0-2.4791E+172]	0.36356	0.274	0.7843	+-	0.216	0.8291	+-	0.842	0.3998	+?	0.411	0.6812	+---+++	0.392	0.6953	+---+++	0.902	0.3672	????+??
4	ACOX3	3	LOF	-	0.0001	4 (0)	0 (0)	157430 [0-4.4152E+203]	0.19372	157430 [0-4.4152E+203]	0.19372	NA	NA	1.268	0.205	++	1.268	0.205	++	NA	NA	NA	0.854	0.3933	???++?+	0.854	0.3933	???++?+	NA	NA	NA
4	ACOX3	2	LOF	-	0.001	7 (0)	2 (0)	0.71 [0.12-4.12]	0.7087	0.71 [0.12-4.12]	0.7087	NA	NA	-0.052	0.9584	-+	-0.052	0.9584	-+	NA	NA	NA	0.664	0.5064	?-?++++	0.664	0.5064	?-?++++	NA	NA	NA
4	ACOX3	1	LOF	-	0.01	7 (0)	2 (0)	0.71 [0.12-4.12]	0.7087	0.71 [0.12-4.12]	0.7087	NA	NA	-0.052	0.9584	-+	-0.052	0.9584	-+	NA	NA	NA	0.664	0.5064	?-?++++	0.664	0.5064	?-?++++	NA	NA	NA
4	ACOX3	6	MISSLOF	TRUE	0.0001	32 (0)	10 (0)	1.17 [0.51-2.66]	0.71253	1.17 [0.51-2.66]	0.71253	NA	NA	0.627	0.5304	++	0.627	0.5304	++	NA	NA	NA	0.6	0.5486	?+++-++	0.6	0.5486	?+++-++	NA	NA	NA
4	ACOX3	9	MISSLOF	FALSE	0.0001	52 (0)	16 (0)	1.23 [0.65-2.34]	0.51629	1.23 [0.65-2.34]	0.51629	NA	NA	0.678	0.4975	++	0.678	0.4975	++	NA	NA	NA	0.637	0.5243	++-++-+	0.637	0.5243	++-++-+	NA	NA	NA
4	ACOX3	5	MISSLOF	TRUE	0.001	50 (0)	14 (0)	1.19 [0.61-2.33]	0.60236	1.19 [0.61-2.33]	0.60236	NA	NA	1.316	0.1882	++	1.316	0.1882	++	NA	NA	NA	0.926	0.3544	?+++-++	0.926	0.3544	?+++-++	NA	NA	NA
4	ACOX3	8	MISSLOF	FALSE	0.001	99 (0)	29 (0)	1.34 [0.84-2.15]	0.21506	1.34 [0.84-2.15]	0.21506	NA	NA	1.166	0.2436	++	1.166	0.2436	++	NA	NA	NA	0.369	0.7118	---+-++	0.369	0.7118	---+-++	NA	NA	NA
4	ACOX3	4	MISSLOF	TRUE	0.01	50 (0)	14 (0)	1.19 [0.61-2.33]	0.60236	1.19 [0.61-2.33]	0.60236	NA	NA	1.316	0.1882	++	1.316	0.1882	++	NA	NA	NA	0.926	0.3544	?+++-++	0.926	0.3544	?+++-++	NA	NA	NA
4	ACOX3	7	MISSLOF	FALSE	0.01	126 (0)	37 (0)	1.27 [0.83-1.94]	0.26434	1.27 [0.83-1.94]	0.26434	NA	NA	0.991	0.3216	++	0.991	0.3216	++	NA	NA	NA	1.111	0.2665	++-++++	1.111	0.2665	++-++++	NA	NA	NA
2	ACOXL	3	LOF	-	0.0001	4 (0)	4 (0)	0.19 [0.04-0.96]	0.057242	0.19 [0.04-0.96]	0.057242	NA	NA	-1.978	0.04789	--	-1.978	0.04789	--	NA	NA	NA	-1.364	0.1726	--?-+??	-1.364	0.1726	--?-+??	NA	NA	NA
2	ACOXL	2	LOF	-	0.001	25 (1)	16 (0)	0.43 [0.21-0.86]	0.020751	0.41 [0.2-0.85]	0.018698	4442.8 [0-2.0415E+171]	0.77395	-1.007	0.3141	+-	-0.98	0.3269	+-	0.287	0.7738	+?	-2.494	0.01263	--?-++?	-2.5	0.01241	--?-++?	0.284	0.7765	????+??
2	ACOXL	1	LOF	-	0.01	48 (1)	35 (1)	0.64 [0.39-1.05]	0.081345	0.65 [0.38-1.09]	0.10414	0.14 [0.01-3.82]	0.25294	-1.732	0.08332	--	-1.571	0.1162	--	-1.15	0.2502	-?	-1.933	0.05326	--?-++?	-1.774	0.07601	--?-++?	-1.54	0.1236	???-+??
2	ACOXL	6	MISSLOF	TRUE	0.0001	34 (0)	19 (0)	0.67 [0.34-1.33]	0.2599	0.67 [0.34-1.33]	0.2599	NA	NA	-1.15	0.25	--	-1.15	0.25	--	NA	NA	NA	-0.926	0.3543	--+-++-	-0.926	0.3543	--+-++-	NA	NA	NA
2	ACOXL	9	MISSLOF	FALSE	0.0001	42 (0)	22 (0)	0.79 [0.42-1.49]	0.47715	0.79 [0.42-1.49]	0.47715	NA	NA	-0.774	0.439	-+	-0.774	0.439	-+	NA	NA	NA	-0.52	0.6034	--+-++-	-0.52	0.6034	--+-++-	NA	NA	NA
2	ACOXL	5	MISSLOF	TRUE	0.001	84 (2)	41 (0)	0.75 [0.48-1.16]	0.19412	0.72 [0.46-1.12]	0.1439	113380 [0-6.2529E+160]	0.19753	-0.255	0.7986	+-	-0.115	0.9085	+-	1.15	0.2501	+?	-1.333	0.1825	--+-++-	-1.367	0.1718	--+-++-	1.026	0.3048	????+??
2	ACOXL	8	MISSLOF	FALSE	0.001	96 (2)	46 (0)	0.82 [0.54-1.24]	0.35954	0.8 [0.52-1.21]	0.28892	113380 [0-6.2529E+160]	0.19753	-0.89	0.3737	--	-1.02	0.3075	--	1.15	0.2501	+?	-0.889	0.3741	--+-++-	-0.933	0.3509	--+-++-	1.026	0.3048	????+??
2	ACOXL	4	MISSLOF	TRUE	0.01	253 (5)	101 (1)	0.85 [0.64-1.12]	0.24458	0.84 [0.63-1.11]	0.22409	1.27 [0.12-13.95]	0.84145	1.288	0.1976	++	1.33	0.1836	++	0.095	0.9241	+?	-0.995	0.3196	--+-++-	-0.943	0.3459	--+-++-	-0.645	0.5192	?+?-+?+
2	ACOXL	7	MISSLOF	FALSE	0.01	264 (5)	106 (1)	0.87 [0.66-1.15]	0.33761	0.87 [0.65-1.15]	0.31518	1.27 [0.12-13.95]	0.84145	-0.896	0.3705	-+	-0.937	0.349	-+	0.095	0.9241	+?	-0.654	0.5132	--+-++-	-0.644	0.5197	--+-++-	-0.645	0.5192	?+?-+?+
2	ACP1	9	MISSLOF	FALSE	0.0001	13 (0)	4 (0)	1.13 [0.28-4.55]	0.85868	1.13 [0.28-4.55]	0.85868	NA	NA	1.043	0.2969	++	1.043	0.2969	++	NA	NA	NA	0.504	0.6143	+++-?+?	0.504	0.6143	+++-?+?	NA	NA	NA
2	ACP1	8	MISSLOF	FALSE	0.001	20 (0)	5 (0)	1.24 [0.39-3.95]	0.71698	1.24 [0.39-3.95]	0.71698	NA	NA	0.676	0.4992	++	0.676	0.4992	++	NA	NA	NA	0.531	0.5953	++-+?+?	0.531	0.5953	++-+?+?	NA	NA	NA
2	ACP1	7	MISSLOF	FALSE	0.01	36 (1)	7 (0)	1.11 [0.44-2.85]	0.82096	1.1 [0.42-2.85]	0.84574	8690.1 [0-3.9937E+171]	0.69088	0.488	0.6252	++	0.455	0.6488	++	0.453	0.6506	+?	0.272	0.7856	+--+++?	0.281	0.7789	+--+++?	0.344	0.7309	+??????
11	ACP2	3	LOF	-	0.0001	4 (0)	0 (0)	73494 [0-8.6742E+224]	0.38431	73494 [0-8.6742E+224]	0.38431	NA	NA	0.847	0.3972	++	0.847	0.3972	++	NA	NA	NA	1.035	0.3008	+??+???	1.035	0.3008	+??+???	NA	NA	NA
11	ACP2	2	LOF	-	0.001	4 (0)	0 (0)	73494 [0-8.6742E+224]	0.38431	73494 [0-8.6742E+224]	0.38431	NA	NA	0.847	0.3972	++	0.847	0.3972	++	NA	NA	NA	1.035	0.3008	+??+???	1.035	0.3008	+??+???	NA	NA	NA
11	ACP2	1	LOF	-	0.01	4 (0)	0 (0)	73494 [0-8.6742E+224]	0.38431	73494 [0-8.6742E+224]	0.38431	NA	NA	0.847	0.3972	++	0.847	0.3972	++	NA	NA	NA	1.035	0.3008	+??+???	1.035	0.3008	+??+???	NA	NA	NA
11	ACP2	6	MISSLOF	TRUE	0.0001	14 (0)	1 (0)	3.83 [0.42-34.57]	0.16873	3.83 [0.42-34.57]	0.16873	NA	NA	1.381	0.1674	++	1.381	0.1674	++	NA	NA	NA	1.503	0.133	++?+??-	1.503	0.133	++?+??-	NA	NA	NA
11	ACP2	9	MISSLOF	FALSE	0.0001	36 (0)	6 (0)	2.32 [0.84-6.42]	0.085295	2.32 [0.84-6.42]	0.085295	NA	NA	1.646	0.09984	++	1.646	0.09984	++	NA	NA	NA	1.801	0.07167	++?+-+-	1.801	0.07167	++?+-+-	NA	NA	NA
11	ACP2	5	MISSLOF	TRUE	0.001	16 (0)	1 (0)	4.08 [0.46-36.07]	0.1391	4.08 [0.46-36.07]	0.1391	NA	NA	1.491	0.1359	++	1.491	0.1359	++	NA	NA	NA	1.821	0.06861	++?+??-	1.821	0.06861	++?+??-	NA	NA	NA
11	ACP2	8	MISSLOF	FALSE	0.001	40 (0)	7 (0)	2.08 [0.81-5.38]	0.10936	2.08 [0.81-5.38]	0.10936	NA	NA	1.612	0.107	++	1.612	0.107	++	NA	NA	NA	1.882	0.05981	++?+-+-	1.882	0.05981	++?+-+-	NA	NA	NA
11	ACP2	4	MISSLOF	TRUE	0.01	16 (0)	1 (0)	4.08 [0.46-36.07]	0.1391	4.08 [0.46-36.07]	0.1391	NA	NA	1.491	0.1359	++	1.491	0.1359	++	NA	NA	NA	1.821	0.06861	++?+??-	1.821	0.06861	++?+??-	NA	NA	NA
11	ACP2	7	MISSLOF	FALSE	0.01	99 (2)	28 (0)	1.42 [0.88-2.28]	0.14185	1.39 [0.86-2.26]	0.1704	110740 [0-6.1294E+173]	0.22342	1.504	0.1327	++	1.418	0.1561	++	1.028	0.304	++	2.071	0.03833	++?++-+	2.016	0.0438	++?++-+	1.216	0.2239	????+?+
19	ACP5	6	MISSLOF	TRUE	0.0001	10 (0)	7 (0)	0.34 [0.1-1.13]	0.083502	0.34 [0.1-1.13]	0.083502	NA	NA	-1.702	0.08883	--	-1.702	0.08883	--	NA	NA	NA	-1.217	0.2237	?-+-+?+	-1.217	0.2237	?-+-+?+	NA	NA	NA
19	ACP5	9	MISSLOF	FALSE	0.0001	23 (0)	9 (0)	0.77 [0.31-1.88]	0.56929	0.77 [0.31-1.88]	0.56929	NA	NA	-0.585	0.5586	-+	-0.585	0.5586	-+	NA	NA	NA	0.013	0.9898	+-++-++	0.013	0.9898	+-++-++	NA	NA	NA
19	ACP5	5	MISSLOF	TRUE	0.001	15 (0)	10 (0)	0.39 [0.14-1.08]	0.07515	0.39 [0.14-1.08]	0.07515	NA	NA	-1.625	0.1042	--	-1.625	0.1042	--	NA	NA	NA	-1.192	0.2333	+-+-+?+	-1.192	0.2333	+-+-+?+	NA	NA	NA
19	ACP5	8	MISSLOF	FALSE	0.001	43 (0)	19 (1)	0.72 [0.39-1.34]	0.30824	0.78 [0.41-1.48]	0.44712	0.06 [0-5.17]	0.054007	-0.055	0.9559	+-	-0.343	0.7313	+-	-1.898	0.05765	-?	-0.308	0.7584	-++--++	-0.171	0.8643	-++--++	-1.747	0.08067	-??????
19	ACP5	4	MISSLOF	TRUE	0.01	50 (0)	23 (0)	0.98 [0.55-1.75]	0.95113	0.98 [0.55-1.75]	0.95113	NA	NA	-0.014	0.9888	+-	-0.014	0.9888	+-	NA	NA	NA	0.258	0.7962	+-++-++	0.258	0.7962	+-++-++	NA	NA	NA
19	ACP5	7	MISSLOF	FALSE	0.01	100 (0)	42 (1)	0.95 [0.63-1.43]	0.80047	0.98 [0.65-1.5]	0.94287	0.06 [0-5.17]	0.054007	0.034	0.9728	+-	0.241	0.8093	+-	-1.898	0.05765	-?	0.256	0.7978	-+++--+	0.393	0.6944	-+++--+	-1.747	0.08067	-??????
1	ACP6	2	LOF	-	0.001	7 (0)	1 (0)	3.01 [0.29-30.64]	0.31363	3.01 [0.29-30.64]	0.31363	NA	NA	1.178	0.2389	+-	1.178	0.2389	+-	NA	NA	NA	-0.056	0.9553	??+-+??	-0.056	0.9553	??+-+??	NA	NA	NA
1	ACP6	1	LOF	-	0.01	7 (0)	1 (0)	3.01 [0.29-30.64]	0.31363	3.01 [0.29-30.64]	0.31363	NA	NA	1.178	0.2389	+-	1.178	0.2389	+-	NA	NA	NA	-0.056	0.9553	??+-+??	-0.056	0.9553	??+-+??	NA	NA	NA
1	ACP6	6	MISSLOF	TRUE	0.0001	17 (0)	9 (0)	0.47 [0.19-1.13]	0.10355	0.47 [0.19-1.13]	0.10355	NA	NA	-1.548	0.1216	--	-1.548	0.1216	--	NA	NA	NA	0.334	0.7384	?+?+-+-	0.334	0.7384	?+?+-+-	NA	NA	NA
1	ACP6	9	MISSLOF	FALSE	0.0001	20 (0)	12 (0)	0.44 [0.2-0.98]	0.051894	0.44 [0.2-0.98]	0.051894	NA	NA	-1.887	0.05916	--	-1.887	0.05916	--	NA	NA	NA	-0.897	0.3696	?+?--+-	-0.897	0.3696	?+?--+-	NA	NA	NA
1	ACP6	5	MISSLOF	TRUE	0.001	39 (0)	15 (0)	0.68 [0.35-1.31]	0.25437	0.68 [0.35-1.31]	0.25437	NA	NA	-0.207	0.836	+-	-0.207	0.836	+-	NA	NA	NA	-0.686	0.4929	+-+--+-	-0.686	0.4929	+-+--+-	NA	NA	NA
1	ACP6	8	MISSLOF	FALSE	0.001	46 (0)	19 (0)	0.69 [0.38-1.26]	0.24067	0.69 [0.38-1.26]	0.24067	NA	NA	-0.075	0.9403	+-	-0.075	0.9403	+-	NA	NA	NA	-1.097	0.2727	+-+--+-	-1.097	0.2727	+-+--+-	NA	NA	NA
1	ACP6	4	MISSLOF	TRUE	0.01	89 (1)	41 (0)	0.77 [0.5-1.18]	0.23872	0.77 [0.5-1.18]	0.23241	5507.4 [0-2.531E+171]	0.74978	-1.112	0.2662	--	-1.132	0.2578	--	0.346	0.7293	+?	-0.601	0.5479	+-+--++	-0.615	0.5387	+-+--++	0.405	0.6857	??????+
1	ACP6	7	MISSLOF	FALSE	0.01	107 (2)	47 (0)	0.81 [0.54-1.21]	0.2993	0.8 [0.54-1.2]	0.29086	9083.6 [0-1.095E+192]	0.71444	0.544	0.5863	+-	-0.965	0.3344	--	0.407	0.6843	+?	-0.578	0.5634	+++--+-	-0.878	0.3802	-++--+-	0.395	0.6926	+?????+
3	ACPL2	9	MISSLOF	FALSE	0.0001	17 (0)	15 (0)	0.46 [0.19-1.1]	0.083064	0.46 [0.19-1.1]	0.083064	NA	NA	-1.726	0.08435	--	-1.726	0.08435	--	NA	NA	NA	-1.841	0.06557	+------	-1.841	0.06557	+------	NA	NA	NA
3	ACPL2	8	MISSLOF	FALSE	0.001	30 (0)	20 (0)	0.69 [0.35-1.36]	0.28728	0.69 [0.35-1.36]	0.28728	NA	NA	-1.072	0.2837	--	-1.072	0.2837	--	NA	NA	NA	-0.907	0.3642	---+---	-0.907	0.3642	---+---	NA	NA	NA
3	ACPL2	7	MISSLOF	FALSE	0.01	49 (0)	25 (0)	0.67 [0.37-1.22]	0.19599	0.67 [0.37-1.22]	0.19599	NA	NA	-1.155	0.2482	--	-1.155	0.2482	--	NA	NA	NA	-1.017	0.3094	---+---	-1.017	0.3094	---+---	NA	NA	NA
3	ACPP	3	LOF	-	0.0001	3 (0)	1 (0)	0.59 [0.05-6.68]	0.67797	0.59 [0.05-6.68]	0.67797	NA	NA	0.096	0.9233	+-	0.096	0.9233	+-	NA	NA	NA	-0.39	0.6966	+??-??+	-0.39	0.6966	+??-??+	NA	NA	NA
3	ACPP	2	LOF	-	0.001	3 (0)	1 (0)	0.59 [0.05-6.68]	0.67797	0.59 [0.05-6.68]	0.67797	NA	NA	0.096	0.9233	+-	0.096	0.9233	+-	NA	NA	NA	-0.39	0.6966	+??-??+	-0.39	0.6966	+??-??+	NA	NA	NA
3	ACPP	1	LOF	-	0.01	13 (0)	8 (0)	1.24 [0.46-3.31]	0.6706	1.24 [0.46-3.31]	0.6706	NA	NA	0.769	0.4419	+-	0.769	0.4419	+-	NA	NA	NA	0.483	0.629	+??-+++	0.483	0.629	+??-+++	NA	NA	NA
3	ACPP	6	MISSLOF	TRUE	0.0001	20 (0)	16 (0)	0.53 [0.25-1.11]	0.093474	0.53 [0.25-1.11]	0.093474	NA	NA	-1.483	0.1381	--	-1.483	0.1381	--	NA	NA	NA	-0.688	0.4912	+-+-+?+	-0.688	0.4912	+-+-+?+	NA	NA	NA
3	ACPP	9	MISSLOF	FALSE	0.0001	36 (0)	22 (0)	0.64 [0.35-1.17]	0.14964	0.64 [0.35-1.17]	0.14964	NA	NA	-1.239	0.2155	--	-1.239	0.2155	--	NA	NA	NA	-0.83	0.4068	+-+--?+	-0.83	0.4068	+-+--?+	NA	NA	NA
3	ACPP	5	MISSLOF	TRUE	0.001	27 (0)	21 (0)	0.6 [0.31-1.16]	0.13001	0.6 [0.31-1.16]	0.13001	NA	NA	-1.508	0.1315	--	-1.508	0.1315	--	NA	NA	NA	-1.145	0.2521	+----++	-1.145	0.2521	+----++	NA	NA	NA
3	ACPP	8	MISSLOF	FALSE	0.001	47 (0)	28 (0)	0.76 [0.44-1.3]	0.31829	0.76 [0.44-1.3]	0.31829	NA	NA	-0.991	0.3215	--	-0.991	0.3215	--	NA	NA	NA	-0.227	0.8206	+-+--++	-0.227	0.8206	+-+--++	NA	NA	NA
3	ACPP	4	MISSLOF	TRUE	0.01	43 (0)	32 (0)	0.71 [0.42-1.21]	0.21465	0.71 [0.42-1.21]	0.21465	NA	NA	-1.11	0.267	--	-1.11	0.267	--	NA	NA	NA	-0.866	0.3865	+---+++	-0.866	0.3865	+---+++	NA	NA	NA
3	ACPP	7	MISSLOF	FALSE	0.01	78 (1)	43 (0)	0.78 [0.51-1.21]	0.27426	0.77 [0.5-1.2]	0.2492	26193 [0-1.2036E+172]	0.50551	-0.989	0.3226	--	-1.037	0.2999	--	0.63	0.5286	+?	-0.575	0.5653	----+++	-0.667	0.5047	----+++	0.899	0.3687	?+?????
19	ACPT	3	LOF	-	0.0001	3 (0)	6 (0)	0.17 [0.04-0.83]	0.017573	0.17 [0.04-0.83]	0.017573	NA	NA	-2.028	0.04252	--	-2.028	0.04252	--	NA	NA	NA	-2.097	0.03598	?-+-??+	-2.097	0.03598	?-+-??+	NA	NA	NA
19	ACPT	2	LOF	-	0.001	3 (0)	6 (0)	0.17 [0.04-0.83]	0.017573	0.17 [0.04-0.83]	0.017573	NA	NA	-2.028	0.04252	--	-2.028	0.04252	--	NA	NA	NA	-2.097	0.03598	?-+-??+	-2.097	0.03598	?-+-??+	NA	NA	NA
19	ACPT	1	LOF	-	0.01	3 (0)	6 (0)	0.17 [0.04-0.83]	0.017573	0.17 [0.04-0.83]	0.017573	NA	NA	-2.028	0.04252	--	-2.028	0.04252	--	NA	NA	NA	-2.097	0.03598	?-+-??+	-2.097	0.03598	?-+-??+	NA	NA	NA
19	ACPT	6	MISSLOF	TRUE	0.0001	24 (0)	13 (0)	0.61 [0.28-1.33]	0.22198	0.61 [0.28-1.33]	0.22198	NA	NA	-0.656	0.5118	+-	-0.656	0.5118	+-	NA	NA	NA	-0.757	0.4492	----+++	-0.757	0.4492	----+++	NA	NA	NA
19	ACPT	9	MISSLOF	FALSE	0.0001	35 (1)	15 (0)	0.79 [0.4-1.55]	0.49908	0.75 [0.37-1.51]	0.42419	38286 [0-1.7597E+172]	0.43265	-0.563	0.5735	+-	-0.579	0.5624	+-	0.578	0.563	+?	-0.144	0.8853	++--+++	-0.217	0.8285	+---+++	0.526	0.5988	?+?????
19	ACPT	5	MISSLOF	TRUE	0.001	29 (0)	15 (0)	0.68 [0.33-1.4]	0.30022	0.68 [0.33-1.4]	0.30022	NA	NA	-0.868	0.3855	--	-0.868	0.3855	--	NA	NA	NA	-0.692	0.4887	----+++	-0.692	0.4887	----+++	NA	NA	NA
19	ACPT	8	MISSLOF	FALSE	0.001	51 (1)	19 (0)	1 [0.55-1.8]	0.99753	0.97 [0.53-1.78]	0.93263	38286 [0-1.7597E+172]	0.43265	0.462	0.6443	++	0.417	0.6766	++	0.578	0.563	+?	0.123	0.9023	+----++	0.133	0.8942	+----++	0.526	0.5988	?+?????
19	ACPT	4	MISSLOF	TRUE	0.01	29 (0)	15 (0)	0.68 [0.33-1.4]	0.30022	0.68 [0.33-1.4]	0.30022	NA	NA	-0.868	0.3855	--	-0.868	0.3855	--	NA	NA	NA	-0.692	0.4887	----+++	-0.692	0.4887	----+++	NA	NA	NA
19	ACPT	7	MISSLOF	FALSE	0.01	51 (1)	19 (0)	1 [0.55-1.8]	0.99753	0.97 [0.53-1.78]	0.93263	38286 [0-1.7597E+172]	0.43265	0.462	0.6443	++	0.417	0.6766	++	0.578	0.563	+?	0.123	0.9023	+----++	0.133	0.8942	+----++	0.526	0.5988	?+?????
22	ACR	1	LOF	-	0.01	3 (0)	2 (0)	0.34 [0.04-3.29]	0.36412	0.34 [0.04-3.29]	0.36412	NA	NA	-0.886	0.3754	--	-0.886	0.3754	--	NA	NA	NA	-0.987	0.3236	?-+-??+	-0.987	0.3236	?-+-??+	NA	NA	NA
22	ACR	6	MISSLOF	TRUE	0.0001	16 (0)	7 (0)	1.1 [0.39-3.14]	0.8568	1.1 [0.39-3.14]	0.8568	NA	NA	-0.26	0.7947	+-	-0.26	0.7947	+-	NA	NA	NA	0.438	0.6617	?-+++?+	0.438	0.6617	?-+++?+	NA	NA	NA
22	ACR	9	MISSLOF	FALSE	0.0001	29 (0)	11 (0)	1.25 [0.56-2.82]	0.58321	1.25 [0.56-2.82]	0.58321	NA	NA	0.712	0.4765	++	0.712	0.4765	++	NA	NA	NA	0.343	0.7315	?-+++-+	0.343	0.7315	?-+++-+	NA	NA	NA
22	ACR	5	MISSLOF	TRUE	0.001	20 (0)	8 (0)	1.08 [0.41-2.87]	0.8729	1.08 [0.41-2.87]	0.8729	NA	NA	-0.254	0.7991	+-	-0.254	0.7991	+-	NA	NA	NA	0.538	0.5903	+-+-+?+	0.538	0.5903	+-+-+?+	NA	NA	NA
22	ACR	8	MISSLOF	FALSE	0.001	40 (1)	12 (0)	1.39 [0.66-2.92]	0.37754	1.38 [0.65-2.93]	0.39498	15837 [0-7.2775E+171]	0.59706	0.984	0.3254	++	0.942	0.3462	++	0.528	0.5977	+?	0.672	0.5017	+-+++-+	0.672	0.5017	+-+++-+	0.102	0.9185	??????+
22	ACR	4	MISSLOF	TRUE	0.01	27 (1)	10 (0)	1.12 [0.49-2.56]	0.78917	1.06 [0.45-2.54]	0.88729	49982 [0-2.2971E+172]	0.37973	0.378	0.7056	++	0.333	0.739	++	0.899	0.3686	+?	0.374	0.7082	+-+-+?+	0.364	0.716	+-+-+?+	0.874	0.382	??+????
22	ACR	7	MISSLOF	FALSE	0.01	47 (2)	14 (0)	1.36 [0.69-2.67]	0.36499	1.32 [0.66-2.67]	0.42679	83966 [0-2.4123E+194]	0.30537	1.025	0.3053	++	0.887	0.3753	++	1.042	0.2973	+?	0.811	0.4172	+-+++-+	0.801	0.423	+-+++-+	0.605	0.5449	??+???+
12	ACRBP	3	LOF	-	0.0001	3 (0)	0 (0)	159410 [0-1.402E+151]	0.093347	159410 [0-1.402E+151]	0.093347	NA	NA	1.821	0.06863	++	1.821	0.06863	++	NA	NA	NA	1.404	0.1604	???+++?	1.404	0.1604	???+++?	NA	NA	NA
12	ACRBP	2	LOF	-	0.001	4 (0)	1 (0)	3.1 [0.27-35.61]	0.337	3.1 [0.27-35.61]	0.337	NA	NA	1.162	0.2451	++	1.162	0.2451	++	NA	NA	NA	0.933	0.351	???+++?	0.933	0.351	???+++?	NA	NA	NA
12	ACRBP	1	LOF	-	0.01	4 (0)	1 (0)	3.1 [0.27-35.61]	0.337	3.1 [0.27-35.61]	0.337	NA	NA	1.162	0.2451	++	1.162	0.2451	++	NA	NA	NA	0.933	0.351	???+++?	0.933	0.351	???+++?	NA	NA	NA
12	ACRBP	6	MISSLOF	TRUE	0.0001	22 (0)	2 (0)	6.93 [1.54-31.15]	0.0025385	6.93 [1.54-31.15]	0.0025385	NA	NA	3.079	0.002074	++	3.079	0.002074	++	NA	NA	NA	3.089	0.002008	++++++?	3.089	0.002008	++++++?	NA	NA	NA
12	ACRBP	9	MISSLOF	FALSE	0.0001	30 (0)	8 (0)	2.32 [0.94-5.71]	0.054071	2.32 [0.94-5.71]	0.054071	NA	NA	2.071	0.0384	++	2.071	0.0384	++	NA	NA	NA	1.929	0.05375	++-++++	1.929	0.05375	++-++++	NA	NA	NA
12	ACRBP	5	MISSLOF	TRUE	0.001	25 (0)	5 (0)	3.17 [1.07-9.42]	0.024654	3.17 [1.07-9.42]	0.024654	NA	NA	2.502	0.01234	++	2.502	0.01234	++	NA	NA	NA	2.568	0.01022	++++++?	2.568	0.01022	++++++?	NA	NA	NA
12	ACRBP	8	MISSLOF	FALSE	0.001	46 (0)	15 (0)	1.71 [0.85-3.42]	0.12318	1.71 [0.85-3.42]	0.12318	NA	NA	1.779	0.0752	++	1.779	0.0752	++	NA	NA	NA	1.42	0.1557	++--+++	1.42	0.1557	++--+++	NA	NA	NA
12	ACRBP	4	MISSLOF	TRUE	0.01	56 (0)	15 (0)	1.49 [0.76-2.92]	0.24066	1.49 [0.76-2.92]	0.24066	NA	NA	1.441	0.1495	++	1.441	0.1495	++	NA	NA	NA	1.761	0.07819	-++++++	1.761	0.07819	-++++++	NA	NA	NA
12	ACRBP	7	MISSLOF	FALSE	0.01	77 (0)	25 (0)	1.29 [0.75-2.22]	0.35563	1.29 [0.75-2.22]	0.35563	NA	NA	1.245	0.213	++	1.245	0.213	++	NA	NA	NA	1.406	0.1598	-+--+++	1.406	0.1598	-+--+++	NA	NA	NA
X	ACRC	6	MISSLOF	TRUE	0.0001	6 (1)	2 (0)	3.71 [0.6-22.82]	0.13422	3.76 [0.61-23.29]	0.13879	14301 [0-6.5713E+171]	0.61413	0.982	0.3259	+-	0.968	0.3333	+-	0.524	0.6	+?	1.127	0.2597	?+?-++?	0.938	0.3481	?+?-++?	0.401	0.6885	???+???
X	ACRC	9	MISSLOF	FALSE	0.0001	24 (6)	11 (2)	1 [0.49-2.02]	0.99695	1.11 [0.44-2.8]	0.82323	0.66 [0.12-3.75]	0.64539	-0.361	0.7184	+-	-0.745	0.4562	--	0.489	0.6247	+?	0.403	0.687	+-?+++-	0.427	0.6697	+-?+++-	0.441	0.6591	?-?+++-
X	ACRC	5	MISSLOF	TRUE	0.001	15 (5)	3 (0)	2.82 [0.73-10.92]	0.083737	2.98 [0.7-12.75]	0.11938	191980 [0-2.6909E+199]	0.12795	1.86	0.06282	++	1.446	0.1482	+-	1.625	0.1042	++	1.733	0.08303	?+?+++?	1.506	0.132	?+?-++?	1.48	0.1389	?+?++??
X	ACRC	8	MISSLOF	FALSE	0.001	43 (14)	12 (2)	1.4 [0.77-2.56]	0.24969	1.52 [0.68-3.42]	0.29693	2.11 [0.44-10.15]	0.31392	0.923	0.3558	+-	0.918	0.3584	+-	1.294	0.1956	++	1.53	0.126	+-?+++-	1.258	0.2083	+-?+++-	1.528	0.1265	+-?+++-
X	ACRC	4	MISSLOF	TRUE	0.01	30 (10)	6 (0)	2.19 [0.85-5.61]	0.0699	2.2 [0.78-6.18]	0.12029	366050 [0-6.8422E+230]	0.066366	1.486	0.1374	+-	1.418	0.1562	+-	2.012	0.04419	++	1.835	0.06652	?+++++?	1.639	0.1013	?++-++?	1.847	0.06475	?++++??
X	ACRC	7	MISSLOF	FALSE	0.01	117 (37)	36 (8)	1.08 [0.75-1.55]	0.68436	1.16 [0.7-1.91]	0.56493	0.99 [0.41-2.38]	0.9844	0.418	0.676	+-	0.49	0.6239	+-	0.158	0.8744	+-	1.036	0.3	--++++-	0.61	0.5417	--+++--	1.027	0.3045	+-++++-
11	ACRV1	3	LOF	-	0.0001	3 (0)	0 (0)	126490 [0-4.4039E+157]	0.13206	126490 [0-4.4039E+157]	0.13206	NA	NA	1.306	0.1914	++	1.306	0.1914	++	NA	NA	NA	1.151	0.2497	?+?+?+?	1.151	0.2497	?+?+?+?	NA	NA	NA
11	ACRV1	2	LOF	-	0.001	3 (0)	0 (0)	126490 [0-4.4039E+157]	0.13206	126490 [0-4.4039E+157]	0.13206	NA	NA	1.306	0.1914	++	1.306	0.1914	++	NA	NA	NA	1.151	0.2497	?+?+?+?	1.151	0.2497	?+?+?+?	NA	NA	NA
11	ACRV1	1	LOF	-	0.01	3 (0)	0 (0)	126490 [0-4.4039E+157]	0.13206	126490 [0-4.4039E+157]	0.13206	NA	NA	1.306	0.1914	++	1.306	0.1914	++	NA	NA	NA	1.151	0.2497	?+?+?+?	1.151	0.2497	?+?+?+?	NA	NA	NA
11	ACRV1	6	MISSLOF	TRUE	0.0001	3 (0)	1 (0)	2.97 [0.23-39.28]	0.38394	2.97 [0.23-39.28]	0.38394	NA	NA	0.665	0.506	+-	0.665	0.506	+-	NA	NA	NA	0.247	0.805	?+?-?+?	0.247	0.805	?+?-?+?	NA	NA	NA
11	ACRV1	9	MISSLOF	FALSE	0.0001	15 (0)	3 (0)	2.69 [0.65-11.13]	0.14139	2.69 [0.65-11.13]	0.14139	NA	NA	1.393	0.1635	++	1.393	0.1635	++	NA	NA	NA	1.251	0.2111	?+?++-+	1.251	0.2111	?+?++-+	NA	NA	NA
11	ACRV1	5	MISSLOF	TRUE	0.001	3 (0)	1 (0)	2.97 [0.23-39.28]	0.38394	2.97 [0.23-39.28]	0.38394	NA	NA	0.665	0.506	+-	0.665	0.506	+-	NA	NA	NA	0.247	0.805	?+?-?+?	0.247	0.805	?+?-?+?	NA	NA	NA
11	ACRV1	8	MISSLOF	FALSE	0.001	28 (0)	4 (0)	2.77 [0.88-8.76]	0.056436	2.77 [0.88-8.76]	0.056436	NA	NA	1.915	0.05553	++	1.915	0.05553	++	NA	NA	NA	1.773	0.07622	+-?++-+	1.773	0.07622	+-?++-+	NA	NA	NA
11	ACRV1	4	MISSLOF	TRUE	0.01	3 (0)	1 (0)	2.97 [0.23-39.28]	0.38394	2.97 [0.23-39.28]	0.38394	NA	NA	0.665	0.506	+-	0.665	0.506	+-	NA	NA	NA	0.247	0.805	?+?-?+?	0.247	0.805	?+?-?+?	NA	NA	NA
11	ACRV1	7	MISSLOF	FALSE	0.01	57 (0)	15 (0)	1.21 [0.63-2.33]	0.55763	1.21 [0.63-2.33]	0.55763	NA	NA	0.048	0.9615	+-	0.048	0.9615	+-	NA	NA	NA	0.493	0.6222	+-+++--	0.493	0.6222	+-+++--	NA	NA	NA
15	ACSBG1	3	LOF	-	0.0001	1 (0)	2 (0)	0.54 [0.05-6.19]	0.6094	0.54 [0.05-6.19]	0.6094	NA	NA	-0.605	0.5453	--	-0.605	0.5453	--	NA	NA	NA	-0.461	0.6449	???-???	-0.461	0.6449	???-???	NA	NA	NA
15	ACSBG1	2	LOF	-	0.001	1 (0)	2 (0)	0.54 [0.05-6.19]	0.6094	0.54 [0.05-6.19]	0.6094	NA	NA	-0.605	0.5453	--	-0.605	0.5453	--	NA	NA	NA	-0.461	0.6449	???-???	-0.461	0.6449	???-???	NA	NA	NA
15	ACSBG1	1	LOF	-	0.01	1 (0)	2 (0)	0.54 [0.05-6.19]	0.6094	0.54 [0.05-6.19]	0.6094	NA	NA	-0.605	0.5453	--	-0.605	0.5453	--	NA	NA	NA	-0.461	0.6449	???-???	-0.461	0.6449	???-???	NA	NA	NA
15	ACSBG1	6	MISSLOF	TRUE	0.0001	7 (0)	6 (0)	0.84 [0.25-2.84]	0.78187	0.84 [0.25-2.84]	0.78187	NA	NA	-0.252	0.8009	--	-0.252	0.8009	--	NA	NA	NA	-0.115	0.9084	?-?-++?	-0.115	0.9084	?-?-++?	NA	NA	NA
15	ACSBG1	9	MISSLOF	FALSE	0.0001	42 (0)	14 (0)	1.63 [0.81-3.27]	0.15945	1.63 [0.81-3.27]	0.15945	NA	NA	1.515	0.1297	++	1.515	0.1297	++	NA	NA	NA	0.887	0.3751	--+++++	0.887	0.3751	--+++++	NA	NA	NA
15	ACSBG1	5	MISSLOF	TRUE	0.001	7 (0)	6 (0)	0.84 [0.25-2.84]	0.78187	0.84 [0.25-2.84]	0.78187	NA	NA	-0.252	0.8009	--	-0.252	0.8009	--	NA	NA	NA	-0.115	0.9084	?-?-++?	-0.115	0.9084	?-?-++?	NA	NA	NA
15	ACSBG1	8	MISSLOF	FALSE	0.001	84 (0)	26 (0)	1.3 [0.78-2.15]	0.31018	1.3 [0.78-2.15]	0.31018	NA	NA	1.075	0.2825	++	1.075	0.2825	++	NA	NA	NA	0.626	0.5313	--+++-+	0.626	0.5313	--+++-+	NA	NA	NA
15	ACSBG1	4	MISSLOF	TRUE	0.01	7 (0)	6 (0)	0.84 [0.25-2.84]	0.78187	0.84 [0.25-2.84]	0.78187	NA	NA	-0.252	0.8009	--	-0.252	0.8009	--	NA	NA	NA	-0.115	0.9084	?-?-++?	-0.115	0.9084	?-?-++?	NA	NA	NA
15	ACSBG1	7	MISSLOF	FALSE	0.01	114 (0)	40 (0)	1.17 [0.77-1.78]	0.45339	1.17 [0.77-1.78]	0.45339	NA	NA	0.777	0.4371	++	0.777	0.4371	++	NA	NA	NA	0.744	0.4566	--+++++	0.744	0.4566	--+++++	NA	NA	NA
19	ACSBG2	3	LOF	-	0.0001	6 (0)	1 (0)	1.87 [0.19-18.78]	0.57251	1.87 [0.19-18.78]	0.57251	NA	NA	0.459	0.6463	++	0.459	0.6463	++	NA	NA	NA	1.108	0.2678	?+?++-+	1.108	0.2678	?+?++-+	NA	NA	NA
19	ACSBG2	2	LOF	-	0.001	12 (0)	4 (0)	0.75 [0.21-2.71]	0.6604	0.75 [0.21-2.71]	0.6604	NA	NA	-0.034	0.9728	+-	-0.034	0.9728	+-	NA	NA	NA	-0.318	0.7506	-+?-+-+	-0.318	0.7506	-+?-+-+	NA	NA	NA
19	ACSBG2	1	LOF	-	0.01	12 (0)	4 (0)	0.75 [0.21-2.71]	0.6604	0.75 [0.21-2.71]	0.6604	NA	NA	-0.034	0.9728	+-	-0.034	0.9728	+-	NA	NA	NA	-0.318	0.7506	-+?-+-+	-0.318	0.7506	-+?-+-+	NA	NA	NA
19	ACSBG2	6	MISSLOF	TRUE	0.0001	34 (0)	9 (0)	1.54 [0.67-3.5]	0.29373	1.54 [0.67-3.5]	0.29373	NA	NA	1.015	0.3102	++	1.015	0.3102	++	NA	NA	NA	0.967	0.3333	-+++--+	0.967	0.3333	-+++--+	NA	NA	NA
19	ACSBG2	9	MISSLOF	FALSE	0.0001	53 (0)	14 (0)	1.49 [0.77-2.91]	0.22491	1.49 [0.77-2.91]	0.22491	NA	NA	1.147	0.2512	++	1.147	0.2512	++	NA	NA	NA	0.373	0.7093	+++--++	0.373	0.7093	+++--++	NA	NA	NA
19	ACSBG2	5	MISSLOF	TRUE	0.001	64 (0)	18 (0)	1.25 [0.69-2.26]	0.45547	1.25 [0.69-2.26]	0.45547	NA	NA	1.004	0.3152	++	1.004	0.3152	++	NA	NA	NA	0.4	0.6891	-++++--	0.4	0.6891	-++++--	NA	NA	NA
19	ACSBG2	8	MISSLOF	FALSE	0.001	93 (0)	23 (0)	1.44 [0.86-2.42]	0.1535	1.44 [0.86-2.42]	0.1535	NA	NA	1.435	0.1512	++	1.435	0.1512	++	NA	NA	NA	0.882	0.3777	++++++-	0.882	0.3777	++++++-	NA	NA	NA
19	ACSBG2	4	MISSLOF	TRUE	0.01	99 (1)	29 (0)	1.06 [0.65-1.73]	0.80259	1.06 [0.65-1.73]	0.80744	2964.8 [0-1.3626E+171]	0.81392	1.436	0.1511	++	1.446	0.1482	++	0.287	0.7738	+?	-0.244	0.8075	--++-+-	-0.246	0.806	--++-+-	0.151	0.8799	+??????
19	ACSBG2	7	MISSLOF	FALSE	0.01	192 (3)	42 (0)	1.43 [0.96-2.12]	0.07076	1.42 [0.96-2.12]	0.074366	17167 [0-3.6499E+159]	0.5454	2.046	0.04072	++	2.017	0.04369	++	0.642	0.5205	+?	1.57	0.1163	-+++++-	1.561	0.1185	-+++++-	0.41	0.6817	+???+??
17	ACSF2	6	MISSLOF	TRUE	0.0001	18 (0)	12 (0)	0.36 [0.15-0.86]	0.023587	0.36 [0.15-0.86]	0.023587	NA	NA	-1.965	0.04944	--	-1.965	0.04944	--	NA	NA	NA	-1.31	0.1902	+++-++-	-1.31	0.1902	+++-++-	NA	NA	NA
17	ACSF2	9	MISSLOF	FALSE	0.0001	27 (0)	12 (0)	0.58 [0.26-1.28]	0.19014	0.58 [0.26-1.28]	0.19014	NA	NA	-1.007	0.3138	-+	-1.007	0.3138	-+	NA	NA	NA	-0.369	0.7124	+++-++-	-0.369	0.7124	+++-++-	NA	NA	NA
17	ACSF2	5	MISSLOF	TRUE	0.001	24 (0)	12 (0)	0.58 [0.26-1.32]	0.20533	0.58 [0.26-1.32]	0.20533	NA	NA	-1.064	0.2874	-+	-1.064	0.2874	-+	NA	NA	NA	-0.401	0.6886	+++-++-	-0.401	0.6886	+++-++-	NA	NA	NA
17	ACSF2	8	MISSLOF	FALSE	0.001	37 (0)	13 (0)	0.75 [0.36-1.56]	0.44489	0.75 [0.36-1.56]	0.44489	NA	NA	1.148	0.2512	++	1.148	0.2512	++	NA	NA	NA	0.138	0.8904	+++-++-	0.138	0.8904	+++-++-	NA	NA	NA
17	ACSF2	4	MISSLOF	TRUE	0.01	96 (2)	38 (1)	0.64 [0.41-0.99]	0.050061	0.61 [0.38-0.97]	0.039147	0.82 [0.07-9.25]	0.87576	1.137	0.2556	+-	1.204	0.2288	+-	-0.133	0.894	-?	-1.437	0.1507	--+-+--	-1.475	0.1401	--+-+--	-0.068	0.946	-????+?
17	ACSF2	7	MISSLOF	FALSE	0.01	109 (2)	39 (1)	0.69 [0.44-1.06]	0.091685	0.66 [0.42-1.05]	0.082024	0.82 [0.07-9.25]	0.87576	1.28	0.2005	+-	1.335	0.1819	+-	-0.133	0.894	-?	-1.053	0.2921	--+-+--	-1.096	0.2729	--+-+--	-0.068	0.946	-????+?
16	ACSF3	3	LOF	-	0.0001	5 (0)	1 (0)	0.81 [0.09-7.36]	0.8525	0.81 [0.09-7.36]	0.8525	NA	NA	-0.011	0.9909	+-	-0.011	0.9909	+-	NA	NA	NA	-0.297	0.7664	?++-??+	-0.297	0.7664	?++-??+	NA	NA	NA
16	ACSF3	2	LOF	-	0.001	5 (0)	1 (0)	0.81 [0.09-7.36]	0.8525	0.81 [0.09-7.36]	0.8525	NA	NA	-0.011	0.9909	+-	-0.011	0.9909	+-	NA	NA	NA	-0.297	0.7664	?++-??+	-0.297	0.7664	?++-??+	NA	NA	NA
16	ACSF3	1	LOF	-	0.01	5 (0)	1 (0)	0.81 [0.09-7.36]	0.8525	0.81 [0.09-7.36]	0.8525	NA	NA	-0.011	0.9909	+-	-0.011	0.9909	+-	NA	NA	NA	-0.297	0.7664	?++-??+	-0.297	0.7664	?++-??+	NA	NA	NA
16	ACSF3	6	MISSLOF	TRUE	0.0001	46 (1)	9 (0)	1.64 [0.75-3.61]	0.1998	1.64 [0.74-3.61]	0.20203	3617.6 [0-1.6625E+171]	0.79515	1.812	0.07003	++	1.812	0.07004	++	0.279	0.7799	+?	0.699	0.4847	-+++++-	0.699	0.4843	-+++++-	0.201	0.8406	??????+
16	ACSF3	9	MISSLOF	FALSE	0.0001	62 (1)	15 (0)	1.82 [0.95-3.48]	0.060933	1.82 [0.95-3.48]	0.06156	3617.6 [0-1.6625E+171]	0.79515	1.966	0.04926	+-	1.965	0.04937	+-	0.279	0.7799	+?	1.799	0.07199	-++++-+	1.206	0.2279	-++++--	0.201	0.8406	??????+
16	ACSF3	5	MISSLOF	TRUE	0.001	68 (1)	19 (0)	1.46 [0.81-2.62]	0.19612	1.46 [0.81-2.62]	0.19808	3617.6 [0-1.6625E+171]	0.79515	1.956	0.05048	++	1.952	0.051	++	0.279	0.7799	+?	0.847	0.3971	-+++++-	0.848	0.3967	-+++++-	0.201	0.8406	??????+
16	ACSF3	8	MISSLOF	FALSE	0.001	89 (1)	26 (0)	1.63 [0.98-2.71]	0.052031	1.63 [0.98-2.71]	0.052425	3617.6 [0-1.6625E+171]	0.79515	1.988	0.04684	+-	1.986	0.04707	+-	0.279	0.7799	+?	1.867	0.0619	-++++-+	1.866	0.062	-++++-+	0.201	0.8406	??????+
16	ACSF3	4	MISSLOF	TRUE	0.01	108 (1)	39 (0)	1.17 [0.76-1.81]	0.47194	1.17 [0.76-1.81]	0.47554	3617.6 [0-1.6625E+171]	0.79515	0.703	0.4819	+-	0.698	0.4855	+-	0.279	0.7799	+?	1.183	0.2369	-++++++	1.182	0.2372	-++++++	0.201	0.8406	??????+
16	ACSF3	7	MISSLOF	FALSE	0.01	128 (1)	46 (0)	1.29 [0.86-1.92]	0.21475	1.29 [0.86-1.92]	0.21649	3617.6 [0-1.6625E+171]	0.79515	1.261	0.2072	+-	1.257	0.2089	+-	0.279	0.7799	+?	1.401	0.1612	-++++-+	1.401	0.1613	-++++-+	0.201	0.8406	??????+
4	ACSL1	3	LOF	-	0.0001	2 (0)	1 (0)	2.76 [0.23-33]	0.40907	2.76 [0.23-33]	0.40907	NA	NA	0.803	0.4221	-+	0.803	0.4221	-+	NA	NA	NA	-0.104	0.9171	?+?-???	-0.104	0.9171	?+?-???	NA	NA	NA
4	ACSL1	2	LOF	-	0.001	2 (0)	1 (0)	2.76 [0.23-33]	0.40907	2.76 [0.23-33]	0.40907	NA	NA	0.803	0.4221	-+	0.803	0.4221	-+	NA	NA	NA	-0.104	0.9171	?+?-???	-0.104	0.9171	?+?-???	NA	NA	NA
4	ACSL1	1	LOF	-	0.01	2 (0)	1 (0)	2.76 [0.23-33]	0.40907	2.76 [0.23-33]	0.40907	NA	NA	0.803	0.4221	-+	0.803	0.4221	-+	NA	NA	NA	-0.104	0.9171	?+?-???	-0.104	0.9171	?+?-???	NA	NA	NA
4	ACSL1	6	MISSLOF	TRUE	0.0001	19 (0)	11 (0)	0.77 [0.33-1.79]	0.54316	0.77 [0.33-1.79]	0.54316	NA	NA	-0.613	0.5401	--	-0.613	0.5401	--	NA	NA	NA	-0.356	0.7222	?++---?	-0.356	0.7222	?++---?	NA	NA	NA
4	ACSL1	9	MISSLOF	FALSE	0.0001	21 (0)	12 (0)	0.7 [0.31-1.58]	0.39678	0.7 [0.31-1.58]	0.39678	NA	NA	-0.869	0.3846	--	-0.869	0.3846	--	NA	NA	NA	-0.618	0.5366	?++----	-0.618	0.5366	?++----	NA	NA	NA
4	ACSL1	5	MISSLOF	TRUE	0.001	28 (0)	15 (0)	0.87 [0.41-1.83]	0.71319	0.87 [0.41-1.83]	0.71319	NA	NA	-0.025	0.98	+-	-0.025	0.98	+-	NA	NA	NA	0.266	0.79	+++---+	0.266	0.79	+++---+	NA	NA	NA
4	ACSL1	8	MISSLOF	FALSE	0.001	32 (0)	17 (0)	0.77 [0.38-1.56]	0.47605	0.77 [0.38-1.56]	0.47605	NA	NA	-0.572	0.5675	--	-0.572	0.5675	--	NA	NA	NA	-0.299	0.765	+++----	-0.299	0.765	+++----	NA	NA	NA
4	ACSL1	4	MISSLOF	TRUE	0.01	38 (0)	23 (0)	0.81 [0.44-1.5]	0.50658	0.81 [0.44-1.5]	0.50658	NA	NA	-0.566	0.5712	--	-0.566	0.5712	--	NA	NA	NA	-0.079	0.9371	+-+---+	-0.079	0.9371	+-+---+	NA	NA	NA
4	ACSL1	7	MISSLOF	FALSE	0.01	42 (0)	25 (0)	0.75 [0.42-1.35]	0.34424	0.75 [0.42-1.35]	0.34424	NA	NA	-0.853	0.3934	--	-0.853	0.3934	--	NA	NA	NA	-0.047	0.9629	+-+-+--	-0.047	0.9629	+-+-+--	NA	NA	NA
2	ACSL3	3	LOF	-	0.0001	2 (0)	1 (0)	1.71 [0.13-22.74]	0.67767	1.71 [0.13-22.74]	0.67767	NA	NA	0.276	0.7828	-+	0.276	0.7828	-+	NA	NA	NA	-0.287	0.7745	???-?+?	-0.287	0.7745	???-?+?	NA	NA	NA
2	ACSL3	2	LOF	-	0.001	2 (0)	1 (0)	1.71 [0.13-22.74]	0.67767	1.71 [0.13-22.74]	0.67767	NA	NA	0.276	0.7828	-+	0.276	0.7828	-+	NA	NA	NA	-0.287	0.7745	???-?+?	-0.287	0.7745	???-?+?	NA	NA	NA
2	ACSL3	1	LOF	-	0.01	2 (0)	1 (0)	1.71 [0.13-22.74]	0.67767	1.71 [0.13-22.74]	0.67767	NA	NA	0.276	0.7828	-+	0.276	0.7828	-+	NA	NA	NA	-0.287	0.7745	???-?+?	-0.287	0.7745	???-?+?	NA	NA	NA
2	ACSL3	6	MISSLOF	TRUE	0.0001	27 (0)	14 (0)	0.6 [0.29-1.25]	0.17784	0.6 [0.29-1.25]	0.17784	NA	NA	-1.289	0.1974	--	-1.289	0.1974	--	NA	NA	NA	-0.993	0.3209	++--++-	-0.993	0.3209	++--++-	NA	NA	NA
2	ACSL3	9	MISSLOF	FALSE	0.0001	31 (0)	16 (0)	0.58 [0.29-1.16]	0.12866	0.58 [0.29-1.16]	0.12866	NA	NA	-1.496	0.1348	--	-1.496	0.1348	--	NA	NA	NA	-1.205	0.2282	++--++-	-1.205	0.2282	++--++-	NA	NA	NA
2	ACSL3	5	MISSLOF	TRUE	0.001	40 (0)	19 (0)	0.58 [0.31-1.09]	0.09862	0.58 [0.31-1.09]	0.09862	NA	NA	-1.657	0.09754	--	-1.657	0.09754	--	NA	NA	NA	-1.317	0.1878	----++-	-1.317	0.1878	----++-	NA	NA	NA
2	ACSL3	8	MISSLOF	FALSE	0.001	52 (0)	23 (0)	0.69 [0.39-1.22]	0.21111	0.69 [0.39-1.22]	0.21111	NA	NA	0.125	0.9002	+-	0.125	0.9002	+-	NA	NA	NA	-1.253	0.2101	+---+--	-1.253	0.2101	+---+--	NA	NA	NA
2	ACSL3	4	MISSLOF	TRUE	0.01	40 (0)	19 (0)	0.58 [0.31-1.09]	0.09862	0.58 [0.31-1.09]	0.09862	NA	NA	-1.657	0.09754	--	-1.657	0.09754	--	NA	NA	NA	-1.317	0.1878	----++-	-1.317	0.1878	----++-	NA	NA	NA
2	ACSL3	7	MISSLOF	FALSE	0.01	52 (0)	23 (0)	0.69 [0.39-1.22]	0.21111	0.69 [0.39-1.22]	0.21111	NA	NA	0.125	0.9002	+-	0.125	0.9002	+-	NA	NA	NA	-1.253	0.2101	+---+--	-1.253	0.2101	+---+--	NA	NA	NA
X	ACSL4	9	MISSLOF	FALSE	0.0001	19 (8)	7 (1)	1.12 [0.46-2.72]	0.80079	1.1 [0.32-3.85]	0.87594	1.48 [0.15-14.08]	0.72644	0.892	0.3726	+-	1.095	0.2733	+-	0.505	0.6136	+-	0.217	0.8282	?-+-+++	0.039	0.9691	?-+-+++	0.191	0.8488	?++-+++
X	ACSL4	8	MISSLOF	FALSE	0.001	24 (10)	15 (2)	0.85 [0.45-1.64]	0.63871	0.72 [0.28-1.86]	0.49593	1.02 [0.19-5.45]	0.9796	-0.01	0.9919	+-	-0.079	0.9373	+-	0.076	0.9392	+-	-0.137	0.8912	?-+-+++	-0.122	0.9029	?-+-+++	0.097	0.9227	?++-+++
X	ACSL4	7	MISSLOF	FALSE	0.01	24 (10)	15 (2)	0.85 [0.45-1.64]	0.63871	0.72 [0.28-1.86]	0.49593	1.02 [0.19-5.45]	0.9796	-0.01	0.9919	+-	-0.079	0.9373	+-	0.076	0.9392	+-	-0.137	0.8912	?-+-+++	-0.122	0.9029	?-+-+++	0.097	0.9227	?++-+++
10	ACSL5	6	MISSLOF	TRUE	0.0001	14 (0)	8 (0)	0.78 [0.27-2.21]	0.63659	0.78 [0.27-2.21]	0.63659	NA	NA	-0.635	0.5255	--	-0.635	0.5255	--	NA	NA	NA	-0.044	0.9648	-?+-+++	-0.044	0.9648	-?+-+++	NA	NA	NA
10	ACSL5	9	MISSLOF	FALSE	0.0001	23 (0)	10 (0)	0.94 [0.39-2.25]	0.89159	0.94 [0.39-2.25]	0.89159	NA	NA	-0.439	0.6604	--	-0.439	0.6604	--	NA	NA	NA	-0.009	0.9929	-?+--++	-0.009	0.9929	-?+--++	NA	NA	NA
10	ACSL5	5	MISSLOF	TRUE	0.001	25 (0)	13 (0)	0.77 [0.34-1.73]	0.52467	0.77 [0.34-1.73]	0.52467	NA	NA	-0.235	0.8144	+-	-0.235	0.8144	+-	NA	NA	NA	-0.034	0.9731	--+-+++	-0.034	0.9731	--+-+++	NA	NA	NA
10	ACSL5	8	MISSLOF	FALSE	0.001	42 (0)	19 (0)	0.74 [0.38-1.44]	0.38763	0.74 [0.38-1.44]	0.38763	NA	NA	-0.802	0.4225	--	-0.802	0.4225	--	NA	NA	NA	-0.325	0.7452	--+--+-	-0.325	0.7452	--+--+-	NA	NA	NA
10	ACSL5	4	MISSLOF	TRUE	0.01	53 (0)	21 (0)	0.89 [0.48-1.63]	0.70584	0.89 [0.48-1.63]	0.70584	NA	NA	0.054	0.9568	+-	0.054	0.9568	+-	NA	NA	NA	-0.41	0.6819	----+-+	-0.41	0.6819	----+-+	NA	NA	NA
10	ACSL5	7	MISSLOF	FALSE	0.01	99 (0)	32 (0)	0.79 [0.49-1.3]	0.36339	0.79 [0.49-1.3]	0.36339	NA	NA	0.926	0.3545	++	0.926	0.3545	++	NA	NA	NA	-0.671	0.5021	--+--+-	-0.671	0.5021	--+--+-	NA	NA	NA
5	ACSL6	6	MISSLOF	TRUE	0.0001	23 (0)	10 (0)	0.7 [0.29-1.66]	0.42382	0.7 [0.29-1.66]	0.42382	NA	NA	-0.884	0.3767	--	-0.884	0.3767	--	NA	NA	NA	-0.655	0.5127	+-+--+-	-0.655	0.5127	+-+--+-	NA	NA	NA
5	ACSL6	9	MISSLOF	FALSE	0.0001	29 (0)	12 (0)	0.73 [0.33-1.62]	0.44756	0.73 [0.33-1.62]	0.44756	NA	NA	0.068	0.946	-+	0.068	0.946	-+	NA	NA	NA	-0.006	0.9954	+--+-+-	-0.006	0.9954	+--+-+-	NA	NA	NA
5	ACSL6	5	MISSLOF	TRUE	0.001	61 (0)	14 (0)	1.04 [0.53-2.03]	0.91072	1.04 [0.53-2.03]	0.91072	NA	NA	0.929	0.3531	++	0.929	0.3531	++	NA	NA	NA	-0.025	0.9798	+++-++-	-0.025	0.9798	+++-++-	NA	NA	NA
5	ACSL6	8	MISSLOF	FALSE	0.001	71 (0)	21 (0)	0.84 [0.47-1.49]	0.55539	0.84 [0.47-1.49]	0.55539	NA	NA	0.67	0.5028	++	0.67	0.5028	++	NA	NA	NA	-0.242	0.8089	++--++-	-0.242	0.8089	++--++-	NA	NA	NA
5	ACSL6	4	MISSLOF	TRUE	0.01	62 (0)	15 (0)	1.05 [0.54-2.02]	0.88922	1.05 [0.54-2.02]	0.88922	NA	NA	0.938	0.3484	++	0.938	0.3484	++	NA	NA	NA	-0.004	0.9969	+++-++-	-0.004	0.9969	+++-++-	NA	NA	NA
5	ACSL6	7	MISSLOF	FALSE	0.01	72 (0)	22 (0)	0.85 [0.48-1.5]	0.57796	0.85 [0.48-1.5]	0.57796	NA	NA	0.646	0.5181	++	0.646	0.5181	++	NA	NA	NA	-0.224	0.8231	++--++-	-0.224	0.8231	++--++-	NA	NA	NA
16	ACSM1	3	LOF	-	0.0001	4 (0)	2 (0)	1.46 [0.24-8.88]	0.67501	1.46 [0.24-8.88]	0.67501	NA	NA	0.649	0.5163	+-	0.649	0.5163	+-	NA	NA	NA	-0.073	0.9418	+?+-+??	-0.073	0.9418	+?+-+??	NA	NA	NA
16	ACSM1	2	LOF	-	0.001	6 (0)	6 (0)	0.66 [0.19-2.27]	0.50908	0.66 [0.19-2.27]	0.50908	NA	NA	-1.081	0.2798	--	-1.081	0.2798	--	NA	NA	NA	-0.451	0.6522	+?+-+??	-0.451	0.6522	+?+-+??	NA	NA	NA
16	ACSM1	1	LOF	-	0.01	6 (0)	6 (0)	0.66 [0.19-2.27]	0.50908	0.66 [0.19-2.27]	0.50908	NA	NA	-1.081	0.2798	--	-1.081	0.2798	--	NA	NA	NA	-0.451	0.6522	+?+-+??	-0.451	0.6522	+?+-+??	NA	NA	NA
16	ACSM1	6	MISSLOF	TRUE	0.0001	23 (0)	9 (0)	1.52 [0.63-3.71]	0.34488	1.52 [0.63-3.71]	0.34488	NA	NA	0.992	0.3214	+-	0.992	0.3214	+-	NA	NA	NA	1.07	0.2848	+++-+++	1.07	0.2848	+++-+++	NA	NA	NA
16	ACSM1	9	MISSLOF	FALSE	0.0001	30 (0)	10 (0)	1.56 [0.68-3.55]	0.28272	1.56 [0.68-3.55]	0.28272	NA	NA	0.923	0.356	+-	0.923	0.356	+-	NA	NA	NA	0.903	0.3666	+-+-+++	0.903	0.3666	+-+-+++	NA	NA	NA
16	ACSM1	5	MISSLOF	TRUE	0.001	60 (0)	26 (0)	0.92 [0.54-1.58]	0.77141	0.92 [0.54-1.58]	0.77141	NA	NA	-0.214	0.8307	+-	-0.214	0.8307	+-	NA	NA	NA	-0.128	0.8981	--+-+++	-0.128	0.8981	--+-+++	NA	NA	NA
16	ACSM1	8	MISSLOF	FALSE	0.001	71 (0)	27 (0)	1.04 [0.62-1.74]	0.89459	1.04 [0.62-1.74]	0.89459	NA	NA	0.236	0.8134	+-	0.236	0.8134	+-	NA	NA	NA	0.183	0.8545	--+-+++	0.183	0.8545	--+-+++	NA	NA	NA
16	ACSM1	4	MISSLOF	TRUE	0.01	175 (1)	51 (1)	1.06 [0.72-1.55]	0.77099	1.1 [0.75-1.62]	0.63468	0.03 [0-0.55]	0.012989	0.213	0.8316	+-	0.388	0.6979	+-	-1.921	0.05474	-?	0.35	0.7263	+-+-+++	0.553	0.5805	+-+-+++	-2.741	0.006118	???-???
16	ACSM1	7	MISSLOF	FALSE	0.01	184 (1)	52 (1)	1.11 [0.76-1.62]	0.58833	1.15 [0.79-1.68]	0.47019	0.03 [0-0.55]	0.012989	0.52	0.6031	+-	0.692	0.4886	+-	-1.921	0.05474	-?	0.893	0.3718	+-+-+++	1.093	0.2744	+-+-+++	-2.741	0.006118	???-???
16	ACSM2A	3	LOF	-	0.0001	8 (0)	3 (0)	1.73 [0.38-7.8]	0.46378	1.73 [0.38-7.8]	0.46378	NA	NA	0.405	0.6858	+-	0.405	0.6858	+-	NA	NA	NA	0.524	0.5999	++?+-?+	0.524	0.5999	++?+-?+	NA	NA	NA
16	ACSM2A	2	LOF	-	0.001	15 (0)	8 (0)	0.61 [0.23-1.62]	0.33289	0.61 [0.23-1.62]	0.33289	NA	NA	-1.117	0.264	--	-1.117	0.264	--	NA	NA	NA	-0.549	0.5827	++?--++	-0.549	0.5827	++?--++	NA	NA	NA
16	ACSM2A	1	LOF	-	0.01	33 (0)	16 (0)	0.99 [0.5-1.97]	0.97947	0.99 [0.5-1.97]	0.97947	NA	NA	-0.195	0.845	-+	-0.195	0.845	-+	NA	NA	NA	-0.068	0.9459	--?+-++	-0.068	0.9459	--?+-++	NA	NA	NA
16	ACSM2A	6	MISSLOF	TRUE	0.0001	43 (1)	13 (0)	1.24 [0.62-2.5]	0.53244	1.24 [0.62-2.5]	0.53754	3289 [0-1.5114E+171]	0.80432	0.6	0.5485	+-	0.592	0.554	+-	0.286	0.7746	+?	1.079	0.2805	++-+-++	1.079	0.2805	++-+-++	0.151	0.8802	+??????
16	ACSM2A	9	MISSLOF	FALSE	0.0001	59 (1)	18 (0)	1.39 [0.76-2.52]	0.27233	1.39 [0.76-2.52]	0.2748	3289 [0-1.5114E+171]	0.80432	1.049	0.2943	+-	1.043	0.2971	+-	0.286	0.7746	+?	1.358	0.1743	++-+-++	1.358	0.1743	++-+-++	0.151	0.8802	+??????
16	ACSM2A	5	MISSLOF	TRUE	0.001	87 (2)	33 (0)	0.91 [0.58-1.43]	0.68592	0.9 [0.57-1.42]	0.65657	21897 [0-8.3887E+189]	0.57147	-0.471	0.6374	+-	-0.513	0.6076	+-	0.611	0.5409	+?	0.461	0.6445	++-+-+-	0.478	0.6329	++-+-+-	0.393	0.6947	+??+???
16	ACSM2A	8	MISSLOF	FALSE	0.001	121 (2)	40 (0)	1.09 [0.72-1.64]	0.6881	1.08 [0.72-1.63]	0.70918	21897 [0-8.3887E+189]	0.57147	0.428	0.6687	+-	0.4	0.6891	+-	0.611	0.5409	+?	0.985	0.3248	+--+-+-	0.975	0.3294	+--+-+-	0.393	0.6947	+??+???
16	ACSM2A	4	MISSLOF	TRUE	0.01	160 (3)	53 (0)	1.06 [0.73-1.52]	0.76356	1.05 [0.73-1.52]	0.79389	22364 [0-1.8638E+158]	0.48942	0.272	0.7856	+-	0.233	0.816	+-	0.761	0.4468	+?	0.121	0.904	++-+-+-	0.108	0.9142	++-+-+-	0.393	0.6947	+??+???
16	ACSM2A	7	MISSLOF	FALSE	0.01	256 (5)	76 (0)	1.08 [0.79-1.48]	0.60987	1.07 [0.79-1.47]	0.65135	65880 [0-2.1783E+203]	0.35757	0.455	0.6492	+-	0.396	0.6921	+-	1.001	0.3167	+?	0.114	0.9091	---+-+-	0.103	0.9183	---+-+-	0.433	0.6649	+??+?+?
16	ACSM2B	3	LOF	-	0.0001	8 (0)	2 (0)	1.53 [0.26-8.93]	0.63055	1.53 [0.26-8.93]	0.63055	NA	NA	1.56	0.1187	++	1.56	0.1187	++	NA	NA	NA	0.695	0.4869	?+?++++	0.695	0.4869	?+?++++	NA	NA	NA
16	ACSM2B	2	LOF	-	0.001	18 (0)	3 (0)	1.46 [0.35-6.04]	0.59081	1.46 [0.35-6.04]	0.59081	NA	NA	1.128	0.2594	++	1.128	0.2594	++	NA	NA	NA	0.988	0.323	++?++++	0.988	0.323	++?++++	NA	NA	NA
16	ACSM2B	1	LOF	-	0.01	18 (0)	3 (0)	1.46 [0.35-6.04]	0.59081	1.46 [0.35-6.04]	0.59081	NA	NA	1.128	0.2594	++	1.128	0.2594	++	NA	NA	NA	0.988	0.323	++?++++	0.988	0.323	++?++++	NA	NA	NA
16	ACSM2B	6	MISSLOF	TRUE	0.0001	42 (0)	19 (0)	0.92 [0.49-1.74]	0.79747	0.92 [0.49-1.74]	0.79747	NA	NA	-0.36	0.7185	-+	-0.36	0.7185	-+	NA	NA	NA	0.519	0.6036	+++-+++	0.519	0.6036	+++-+++	NA	NA	NA
16	ACSM2B	9	MISSLOF	FALSE	0.0001	58 (0)	37 (0)	0.68 [0.41-1.11]	0.12519	0.68 [0.41-1.11]	0.12519	NA	NA	-1.598	0.11	--	-1.598	0.11	--	NA	NA	NA	-0.74	0.4595	+++--++	-0.74	0.4595	+++--++	NA	NA	NA
16	ACSM2B	5	MISSLOF	TRUE	0.001	99 (0)	41 (0)	0.85 [0.55-1.31]	0.46911	0.85 [0.55-1.31]	0.46911	NA	NA	-0.672	0.5013	+-	-0.672	0.5013	+-	NA	NA	NA	0.252	0.8012	+++-+++	0.252	0.8012	+++-+++	NA	NA	NA
16	ACSM2B	8	MISSLOF	FALSE	0.001	124 (0)	57 (0)	0.81 [0.56-1.17]	0.2674	0.81 [0.56-1.17]	0.2674	NA	NA	-1.1	0.2715	--	-1.1	0.2715	--	NA	NA	NA	-0.058	0.9538	+++--++	-0.058	0.9538	+++--++	NA	NA	NA
16	ACSM2B	4	MISSLOF	TRUE	0.01	232 (1)	113 (1)	0.84 [0.64-1.1]	0.2044	0.84 [0.64-1.11]	0.22189	0.33 [0.02-7.21]	0.48543	-1.251	0.2108	--	-1.216	0.224	--	-0.741	0.4588	?-	-0.698	0.4851	+++---+	-0.661	0.5084	+++---+	-0.726	0.4678	???-???
16	ACSM2B	7	MISSLOF	FALSE	0.01	286 (4)	139 (1)	0.79 [0.61-1.01]	0.065678	0.79 [0.61-1.02]	0.069445	0.49 [0.03-6.96]	0.61278	-1.82	0.06877	--	-1.799	0.07206	--	-0.014	0.9892	+-	-1.272	0.2035	+++---+	-1.246	0.2128	+++---+	-0.527	0.5979	???-??+
16	ACSM3	3	LOF	-	0.0001	14 (0)	4 (0)	1.74 [0.52-5.8]	0.35471	1.74 [0.52-5.8]	0.35471	NA	NA	0.952	0.341	++	0.952	0.341	++	NA	NA	NA	0.911	0.3622	--+++++	0.911	0.3622	--+++++	NA	NA	NA
16	ACSM3	2	LOF	-	0.001	18 (0)	5 (0)	1.51 [0.5-4.53]	0.45324	1.51 [0.5-4.53]	0.45324	NA	NA	0.697	0.4861	++	0.697	0.4861	++	NA	NA	NA	0.727	0.4674	--+++++	0.727	0.4674	--+++++	NA	NA	NA
16	ACSM3	1	LOF	-	0.01	65 (1)	20 (0)	1.51 [0.84-2.69]	0.15665	1.5 [0.84-2.69]	0.16185	12145 [0-5.5817E+171]	0.6409	1.256	0.2092	++	1.236	0.2166	++	0.523	0.6012	+?	1.731	0.08354	+-+++++	1.76	0.07841	+-+++++	0.464	0.6428	+??????
16	ACSM3	6	MISSLOF	TRUE	0.0001	43 (0)	10 (0)	1.54 [0.72-3.32]	0.25719	1.54 [0.72-3.32]	0.25719	NA	NA	1.056	0.2908	++	1.056	0.2908	++	NA	NA	NA	1.282	0.1999	--++++-	1.282	0.1999	--++++-	NA	NA	NA
16	ACSM3	9	MISSLOF	FALSE	0.0001	51 (0)	14 (0)	1.3 [0.66-2.55]	0.43741	1.3 [0.66-2.55]	0.43741	NA	NA	0.684	0.4941	++	0.684	0.4941	++	NA	NA	NA	1.124	0.2612	-+++++-	1.124	0.2612	-+++++-	NA	NA	NA
16	ACSM3	5	MISSLOF	TRUE	0.001	69 (0)	17 (0)	1.23 [0.67-2.26]	0.49486	1.23 [0.67-2.26]	0.49486	NA	NA	1.073	0.2831	++	1.073	0.2831	++	NA	NA	NA	1.213	0.2253	---+-++	1.213	0.2253	---+-++	NA	NA	NA
16	ACSM3	8	MISSLOF	FALSE	0.001	77 (0)	22 (0)	1.09 [0.63-1.88]	0.76862	1.09 [0.63-1.88]	0.76862	NA	NA	0.721	0.471	++	0.721	0.471	++	NA	NA	NA	0.599	0.549	---+-+-	0.599	0.549	---+-+-	NA	NA	NA
16	ACSM3	4	MISSLOF	TRUE	0.01	271 (5)	86 (1)	1.08 [0.81-1.45]	0.58596	1.1 [0.82-1.48]	0.51695	0.29 [0.03-2.63]	0.33202	1.668	0.0953	++	1.579	0.1142	++	1.072	0.2837	++	0.552	0.5812	+--+-+-	0.703	0.4823	+--+-+-	-2.251	0.0244	+??-?+?
16	ACSM3	7	MISSLOF	FALSE	0.01	297 (5)	97 (1)	1.09 [0.82-1.44]	0.5427	1.11 [0.84-1.47]	0.47939	0.29 [0.03-2.63]	0.33202	1.361	0.1735	++	1.269	0.2043	++	1.072	0.2837	++	0.455	0.6494	+--+-+-	0.594	0.5527	+--+-+-	-2.251	0.0244	+??-?+?
12	ACSM4	3	LOF	-	0.0001	3 (0)	4 (0)	0.27 [0.04-1.82]	0.16142	0.27 [0.04-1.82]	0.16142	NA	NA	-0.979	0.3275	--	-0.979	0.3275	--	NA	NA	NA	-0.885	0.3763	?+?-???	-0.885	0.3763	?+?-???	NA	NA	NA
12	ACSM4	2	LOF	-	0.001	5 (0)	4 (0)	0.46 [0.1-2.18]	0.32958	0.46 [0.1-2.18]	0.32958	NA	NA	-0.666	0.5054	+-	-0.666	0.5054	+-	NA	NA	NA	-0.53	0.5963	?+?-++?	-0.53	0.5963	?+?-++?	NA	NA	NA
12	ACSM4	1	LOF	-	0.01	5 (0)	4 (0)	0.46 [0.1-2.18]	0.32958	0.46 [0.1-2.18]	0.32958	NA	NA	-0.666	0.5054	+-	-0.666	0.5054	+-	NA	NA	NA	-0.53	0.5963	?+?-++?	-0.53	0.5963	?+?-++?	NA	NA	NA
12	ACSM4	6	MISSLOF	TRUE	0.0001	31 (0)	12 (0)	0.99 [0.46-2.13]	0.9836	0.99 [0.46-2.13]	0.9836	NA	NA	-0.067	0.9467	+-	-0.067	0.9467	+-	NA	NA	NA	0.302	0.7626	+-?--++	0.302	0.7626	+-?--++	NA	NA	NA
12	ACSM4	9	MISSLOF	FALSE	0.0001	37 (0)	16 (0)	0.86 [0.43-1.71]	0.66711	0.86 [0.43-1.71]	0.66711	NA	NA	-0.503	0.6152	-+	-0.503	0.6152	-+	NA	NA	NA	-0.057	0.9548	++?--++	-0.057	0.9548	++?--++	NA	NA	NA
12	ACSM4	5	MISSLOF	TRUE	0.001	49 (0)	15 (0)	1.32 [0.69-2.52]	0.39076	1.32 [0.69-2.52]	0.39076	NA	NA	0.718	0.4728	++	0.718	0.4728	++	NA	NA	NA	1.101	0.2709	+-?+-++	1.101	0.2709	+-?+-++	NA	NA	NA
12	ACSM4	8	MISSLOF	FALSE	0.001	73 (0)	25 (0)	1.11 [0.67-1.86]	0.6855	1.11 [0.67-1.86]	0.6855	NA	NA	0.473	0.636	++	0.473	0.636	++	NA	NA	NA	0.84	0.401	+-?+-++	0.84	0.401	+-?+-++	NA	NA	NA
12	ACSM4	4	MISSLOF	TRUE	0.01	135 (2)	42 (1)	1 [0.66-1.52]	0.99767	1.03 [0.68-1.58]	0.87826	0.12 [0.01-2.62]	0.20813	-0.075	0.9399	+-	0.064	0.9492	+-	-1.157	0.2474	-?	0.829	0.4074	+--+-++	0.829	0.4074	+--+-++	NA	NA	NA
12	ACSM4	7	MISSLOF	FALSE	0.01	158 (2)	52 (1)	0.96 [0.66-1.4]	0.82725	0.98 [0.67-1.44]	0.93198	0.12 [0.01-2.62]	0.20813	0.325	0.7451	++	0.206	0.8368	++	-1.157	0.2474	-?	0.849	0.396	+--+-++	0.849	0.396	+--+-++	NA	NA	NA
16	ACSM5	3	LOF	-	0.0001	3 (0)	2 (0)	0.98 [0.11-9.17]	0.98829	0.98 [0.11-9.17]	0.98829	NA	NA	0.609	0.5429	+-	0.609	0.5429	+-	NA	NA	NA	-0.539	0.5902	??+-++?	-0.539	0.5902	??+-++?	NA	NA	NA
16	ACSM5	2	LOF	-	0.001	11 (0)	2 (0)	1.59 [0.25-10.07]	0.61618	1.59 [0.25-10.07]	0.61618	NA	NA	1.074	0.2829	+-	1.074	0.2829	+-	NA	NA	NA	-0.241	0.8098	??+-+++	-0.241	0.8098	??+-+++	NA	NA	NA
16	ACSM5	1	LOF	-	0.01	11 (0)	2 (0)	1.59 [0.25-10.07]	0.61618	1.59 [0.25-10.07]	0.61618	NA	NA	1.074	0.2829	+-	1.074	0.2829	+-	NA	NA	NA	-0.241	0.8098	??+-+++	-0.241	0.8098	??+-+++	NA	NA	NA
16	ACSM5	6	MISSLOF	TRUE	0.0001	33 (0)	11 (0)	1.03 [0.47-2.23]	0.94309	1.03 [0.47-2.23]	0.94309	NA	NA	-0.012	0.9908	+-	-0.012	0.9908	+-	NA	NA	NA	0.025	0.9803	+-++-++	0.025	0.9803	+-++-++	NA	NA	NA
16	ACSM5	9	MISSLOF	FALSE	0.0001	38 (0)	14 (0)	1.04 [0.51-2.12]	0.92079	1.04 [0.51-2.12]	0.92079	NA	NA	-0.009	0.9931	+-	-0.009	0.9931	+-	NA	NA	NA	0.102	0.9189	+-++-++	0.102	0.9189	+-++-++	NA	NA	NA
16	ACSM5	5	MISSLOF	TRUE	0.001	81 (1)	21 (0)	1 [0.58-1.73]	0.99089	1 [0.57-1.73]	0.986	2342.6 [0-1.0765E+171]	0.83401	0.321	0.7481	++	0.328	0.7429	++	0.216	0.8287	+?	0.336	0.7365	++++--+	0.303	0.7619	++++--+	0.382	0.7022	????+??
16	ACSM5	8	MISSLOF	FALSE	0.001	87 (1)	25 (0)	0.95 [0.56-1.59]	0.84408	0.95 [0.56-1.59]	0.83921	2342.6 [0-1.0765E+171]	0.83401	0.429	0.6676	++	0.436	0.663	++	0.216	0.8287	+?	-0.562	0.574	+++---+	-0.595	0.5521	+++---+	0.382	0.7022	????+??
16	ACSM5	4	MISSLOF	TRUE	0.01	287 (3)	98 (2)	0.95 [0.72-1.25]	0.71268	0.98 [0.74-1.29]	0.86052	0.12 [0.01-1]	0.070515	0.43	0.6668	++	0.383	0.7014	++	-1.901	0.05726	--	0.567	0.5709	-+++--+	0.585	0.5588	-+++--+	-1.087	0.2772	-+?-+??
16	ACSM5	7	MISSLOF	FALSE	0.01	362 (5)	139 (3)	0.98 [0.77-1.25]	0.88532	1 [0.79-1.28]	0.98999	0.3 [0.05-1.73]	0.19766	-0.074	0.9413	+-	0.091	0.9275	+-	-1.447	0.1479	-+	-0.286	0.775	-++---+	-0.182	0.8556	-++---+	-0.099	0.9212	-+?++??
20	ACSS1	3	LOF	-	0.0001	2 (0)	1 (0)	0.64 [0.04-9.65]	0.75326	0.64 [0.04-9.65]	0.75326	NA	NA	-0.399	0.6895	-?	-0.399	0.6895	-?	NA	NA	NA	0.8	0.4239	-??+?+?	0.8	0.4239	-??+?+?	NA	NA	NA
20	ACSS1	2	LOF	-	0.001	2 (0)	1 (0)	0.64 [0.04-9.65]	0.75326	0.64 [0.04-9.65]	0.75326	NA	NA	-0.399	0.6895	-?	-0.399	0.6895	-?	NA	NA	NA	0.8	0.4239	-??+?+?	0.8	0.4239	-??+?+?	NA	NA	NA
20	ACSS1	1	LOF	-	0.01	2 (0)	1 (0)	0.64 [0.04-9.65]	0.75326	0.64 [0.04-9.65]	0.75326	NA	NA	-0.399	0.6895	-?	-0.399	0.6895	-?	NA	NA	NA	0.8	0.4239	-??+?+?	0.8	0.4239	-??+?+?	NA	NA	NA
20	ACSS1	6	MISSLOF	TRUE	0.0001	24 (0)	6 (0)	1.06 [0.39-2.92]	0.90742	1.06 [0.39-2.92]	0.90742	NA	NA	0.279	0.7806	++	0.279	0.7806	++	NA	NA	NA	0.388	0.6981	-+?+-++	0.388	0.6981	-+?+-++	NA	NA	NA
20	ACSS1	9	MISSLOF	FALSE	0.0001	31 (0)	10 (0)	1.17 [0.49-2.79]	0.71385	1.17 [0.49-2.79]	0.71385	NA	NA	0.287	0.7744	-+	0.287	0.7744	-+	NA	NA	NA	1.067	0.2862	-+?++++	1.067	0.2862	-+?++++	NA	NA	NA
20	ACSS1	5	MISSLOF	TRUE	0.001	48 (0)	16 (0)	1.16 [0.61-2.24]	0.64579	1.16 [0.61-2.24]	0.64579	NA	NA	0.514	0.6072	++	0.514	0.6072	++	NA	NA	NA	0.371	0.7108	+--+-++	0.371	0.7108	+--+-++	NA	NA	NA
20	ACSS1	8	MISSLOF	FALSE	0.001	60 (0)	21 (0)	1.2 [0.67-2.16]	0.53495	1.2 [0.67-2.16]	0.53495	NA	NA	0.658	0.5103	++	0.658	0.5103	++	NA	NA	NA	0.848	0.3966	++-+-++	0.848	0.3966	++-+-++	NA	NA	NA
20	ACSS1	4	MISSLOF	TRUE	0.01	113 (1)	33 (0)	0.92 [0.58-1.45]	0.71109	0.9 [0.57-1.43]	0.66772	31282 [0-1.4375E+172]	0.47167	0.199	0.8426	+-	0.253	0.7999	+-	0.724	0.4693	+?	-0.551	0.5813	+-++-+-	-0.551	0.5813	+-++-+-	NA	NA	NA
20	ACSS1	7	MISSLOF	FALSE	0.01	186 (2)	49 (1)	1.17 [0.8-1.73]	0.4185	1.19 [0.8-1.77]	0.39143	0.73 [0.04-12.17]	0.83083	0.75	0.4535	++	0.801	0.4229	++	-0.25	0.8027	-?	-0.994	0.3201	+-++-+-	0.237	0.8126	++++-+-	-1.127	0.2598	?-?????
20	ACSS2	6	MISSLOF	TRUE	0.0001	29 (0)	8 (0)	1.25 [0.5-3.11]	0.6325	1.25 [0.5-3.11]	0.6325	NA	NA	0.14	0.8883	+-	0.14	0.8883	+-	NA	NA	NA	0.643	0.5201	+--++++	0.643	0.5201	+--++++	NA	NA	NA
20	ACSS2	9	MISSLOF	FALSE	0.0001	33 (0)	10 (0)	1.1 [0.48-2.52]	0.8146	1.1 [0.48-2.52]	0.8146	NA	NA	-0.129	0.8975	+-	-0.129	0.8975	+-	NA	NA	NA	0.403	0.6873	+--++++	0.403	0.6873	+--++++	NA	NA	NA
20	ACSS2	5	MISSLOF	TRUE	0.001	48 (0)	13 (0)	1.41 [0.7-2.83]	0.3235	1.41 [0.7-2.83]	0.3235	NA	NA	1.39	0.1646	++	1.39	0.1646	++	NA	NA	NA	1.354	0.1757	+--++++	1.354	0.1757	+--++++	NA	NA	NA
20	ACSS2	8	MISSLOF	FALSE	0.001	59 (0)	16 (0)	1.24 [0.66-2.33]	0.4966	1.24 [0.66-2.33]	0.4966	NA	NA	0.771	0.4407	++	0.771	0.4407	++	NA	NA	NA	0.953	0.3406	+--+++-	0.953	0.3406	+--+++-	NA	NA	NA
20	ACSS2	4	MISSLOF	TRUE	0.01	116 (3)	31 (0)	1.08 [0.68-1.72]	0.74437	1.08 [0.67-1.72]	0.75923	8809.1 [0-1.9257E+161]	0.66615	1.691	0.09086	++	1.735	0.08279	++	0.585	0.5587	++	1.096	0.273	++-++++	1.095	0.2737	++-++++	0.175	0.861	?+?????
20	ACSS2	7	MISSLOF	FALSE	0.01	137 (3)	34 (0)	1.12 [0.72-1.74]	0.60764	1.12 [0.72-1.74]	0.62005	8809.1 [0-1.9257E+161]	0.66615	1.605	0.1085	++	1.637	0.1017	++	0.585	0.5587	++	1.01	0.3126	++-+-+-	1.008	0.3136	++-+-+-	0.175	0.861	?+?????
12	ACSS3	6	MISSLOF	TRUE	0.0001	5 (0)	0 (0)	203500 [0-8.9141E+174]	0.10543	203500 [0-8.9141E+174]	0.10543	NA	NA	1.518	0.129	+?	1.518	0.129	+?	NA	NA	NA	0.887	0.3753	?++?+?+	0.887	0.3753	?++?+?+	NA	NA	NA
12	ACSS3	9	MISSLOF	FALSE	0.0001	43 (0)	19 (0)	0.91 [0.47-1.74]	0.77486	0.91 [0.47-1.74]	0.77486	NA	NA	-0.28	0.7797	+-	-0.28	0.7797	+-	NA	NA	NA	-0.279	0.7802	-++-+-+	-0.279	0.7802	-++-+-+	NA	NA	NA
12	ACSS3	5	MISSLOF	TRUE	0.001	5 (0)	0 (0)	203500 [0-8.9141E+174]	0.10543	203500 [0-8.9141E+174]	0.10543	NA	NA	1.518	0.129	+?	1.518	0.129	+?	NA	NA	NA	0.887	0.3753	?++?+?+	0.887	0.3753	?++?+?+	NA	NA	NA
12	ACSS3	8	MISSLOF	FALSE	0.001	49 (0)	24 (0)	0.78 [0.44-1.4]	0.415	0.78 [0.44-1.4]	0.415	NA	NA	-0.901	0.3677	--	-0.901	0.3677	--	NA	NA	NA	-0.969	0.3323	-++---+	-0.969	0.3323	-++---+	NA	NA	NA
12	ACSS3	4	MISSLOF	TRUE	0.01	5 (0)	0 (0)	203500 [0-8.9141E+174]	0.10543	203500 [0-8.9141E+174]	0.10543	NA	NA	1.518	0.129	+?	1.518	0.129	+?	NA	NA	NA	0.887	0.3753	?++?+?+	0.887	0.3753	?++?+?+	NA	NA	NA
12	ACSS3	7	MISSLOF	FALSE	0.01	61 (0)	28 (0)	0.96 [0.57-1.63]	0.87826	0.96 [0.57-1.63]	0.87826	NA	NA	-0.395	0.693	--	-0.395	0.693	--	NA	NA	NA	-0.342	0.7323	-++---+	-0.342	0.7323	-++---+	NA	NA	NA
1	ACTA1	9	MISSLOF	FALSE	0.0001	2 (0)	1 (0)	0.8 [0.05-13.41]	0.87684	0.8 [0.05-13.41]	0.87684	NA	NA	0.129	0.8975	+-	0.129	0.8975	+-	NA	NA	NA	-0.209	0.8345	?+?-???	-0.209	0.8345	?+?-???	NA	NA	NA
1	ACTA1	8	MISSLOF	FALSE	0.001	2 (0)	1 (0)	0.8 [0.05-13.41]	0.87684	0.8 [0.05-13.41]	0.87684	NA	NA	0.129	0.8975	+-	0.129	0.8975	+-	NA	NA	NA	-0.209	0.8345	?+?-???	-0.209	0.8345	?+?-???	NA	NA	NA
1	ACTA1	7	MISSLOF	FALSE	0.01	2 (0)	1 (0)	0.8 [0.05-13.41]	0.87684	0.8 [0.05-13.41]	0.87684	NA	NA	0.129	0.8975	+-	0.129	0.8975	+-	NA	NA	NA	-0.209	0.8345	?+?-???	-0.209	0.8345	?+?-???	NA	NA	NA
10	ACTA2	6	MISSLOF	TRUE	0.0001	5 (0)	2 (0)	1.85 [0.27-12.57]	0.52092	1.85 [0.27-12.57]	0.52092	NA	NA	0.633	0.5267	+-	0.633	0.5267	+-	NA	NA	NA	0.746	0.4556	?+?++??	0.746	0.4556	?+?++??	NA	NA	NA
10	ACTA2	9	MISSLOF	FALSE	0.0001	7 (0)	2 (0)	2.1 [0.34-13.15]	0.41216	2.1 [0.34-13.15]	0.41216	NA	NA	0.796	0.4263	+-	0.796	0.4263	+-	NA	NA	NA	0.909	0.3631	?+?++?+	0.909	0.3631	?+?++?+	NA	NA	NA
10	ACTA2	5	MISSLOF	TRUE	0.001	5 (0)	2 (0)	1.85 [0.27-12.57]	0.52092	1.85 [0.27-12.57]	0.52092	NA	NA	0.633	0.5267	+-	0.633	0.5267	+-	NA	NA	NA	0.746	0.4556	?+?++??	0.746	0.4556	?+?++??	NA	NA	NA
10	ACTA2	8	MISSLOF	FALSE	0.001	7 (0)	2 (0)	2.1 [0.34-13.15]	0.41216	2.1 [0.34-13.15]	0.41216	NA	NA	0.796	0.4263	+-	0.796	0.4263	+-	NA	NA	NA	0.909	0.3631	?+?++?+	0.909	0.3631	?+?++?+	NA	NA	NA
10	ACTA2	4	MISSLOF	TRUE	0.01	5 (0)	2 (0)	1.85 [0.27-12.57]	0.52092	1.85 [0.27-12.57]	0.52092	NA	NA	0.633	0.5267	+-	0.633	0.5267	+-	NA	NA	NA	0.746	0.4556	?+?++??	0.746	0.4556	?+?++??	NA	NA	NA
10	ACTA2	7	MISSLOF	FALSE	0.01	7 (0)	2 (0)	2.1 [0.34-13.15]	0.41216	2.1 [0.34-13.15]	0.41216	NA	NA	0.796	0.4263	+-	0.796	0.4263	+-	NA	NA	NA	0.909	0.3631	?+?++?+	0.909	0.3631	?+?++?+	NA	NA	NA
5	ACTBL2	3	LOF	-	0.0001	7 (0)	5 (0)	0.49 [0.12-2]	0.32585	0.49 [0.12-2]	0.32585	NA	NA	-0.024	0.9805	+-	-0.024	0.9805	+-	NA	NA	NA	-0.634	0.5259	?++-++?	-0.634	0.5259	?++-++?	NA	NA	NA
5	ACTBL2	2	LOF	-	0.001	10 (1)	6 (0)	0.51 [0.17-1.57]	0.258	0.4 [0.11-1.41]	0.16731	22223 [0-1.0213E+172]	0.53696	0.224	0.823	+-	-0.98	0.3269	--	0.64	0.5225	+?	-0.702	0.4825	-++-++?	-0.857	0.3913	-++-++?	0.786	0.4317	+??????
5	ACTBL2	1	LOF	-	0.01	10 (1)	6 (0)	0.51 [0.17-1.57]	0.258	0.4 [0.11-1.41]	0.16731	22223 [0-1.0213E+172]	0.53696	0.224	0.823	+-	-0.98	0.3269	--	0.64	0.5225	+?	-0.702	0.4825	-++-++?	-0.857	0.3913	-++-++?	0.786	0.4317	+??????
5	ACTBL2	6	MISSLOF	TRUE	0.0001	17 (0)	6 (0)	1.13 [0.38-3.37]	0.82314	1.13 [0.38-3.37]	0.82314	NA	NA	0.321	0.7479	+-	0.321	0.7479	+-	NA	NA	NA	0.445	0.6562	+++-++?	0.445	0.6562	+++-++?	NA	NA	NA
5	ACTBL2	9	MISSLOF	FALSE	0.0001	38 (0)	10 (0)	1.29 [0.57-2.93]	0.52946	1.29 [0.57-2.93]	0.52946	NA	NA	1.238	0.2157	++	1.238	0.2157	++	NA	NA	NA	0.665	0.506	+++-+-+	0.665	0.506	+++-+-+	NA	NA	NA
5	ACTBL2	5	MISSLOF	TRUE	0.001	30 (1)	7 (0)	1.43 [0.56-3.67]	0.44714	1.41 [0.54-3.7]	0.47934	22223 [0-1.0213E+172]	0.53696	0.534	0.5935	+-	0.49	0.6243	+-	0.64	0.5225	+?	1.201	0.2299	-++-+++	1.108	0.2679	-++-+++	0.786	0.4317	+??????
5	ACTBL2	8	MISSLOF	FALSE	0.001	74 (1)	15 (0)	1.7 [0.9-3.22]	0.088831	1.7 [0.89-3.23]	0.094174	22223 [0-1.0213E+172]	0.53696	2.125	0.03355	++	2.096	0.03608	++	0.64	0.5225	+?	1.716	0.08621	+++++-+	1.672	0.09443	+++++-+	0.786	0.4317	+??????
5	ACTBL2	4	MISSLOF	TRUE	0.01	30 (1)	7 (0)	1.43 [0.56-3.67]	0.44714	1.41 [0.54-3.7]	0.47934	22223 [0-1.0213E+172]	0.53696	0.534	0.5935	+-	0.49	0.6243	+-	0.64	0.5225	+?	1.201	0.2299	-++-+++	1.108	0.2679	-++-+++	0.786	0.4317	+??????
5	ACTBL2	7	MISSLOF	FALSE	0.01	198 (1)	58 (0)	1.29 [0.91-1.83]	0.1525	1.29 [0.9-1.83]	0.15932	22223 [0-1.0213E+172]	0.53696	1.713	0.08667	++	1.688	0.09145	++	0.64	0.5225	+?	1.451	0.1469	+++++-+	1.438	0.1505	+++++-+	0.786	0.4317	+??????
15	ACTC1	6	MISSLOF	TRUE	0.0001	3 (0)	0 (0)	465990 [0-3.3973E+232]	0.07885	465990 [0-3.3973E+232]	0.07885	NA	NA	1.565	0.1177	++	1.565	0.1177	++	NA	NA	NA	1.503	0.1328	???+???	1.503	0.1328	???+???	NA	NA	NA
15	ACTC1	9	MISSLOF	FALSE	0.0001	3 (0)	0 (0)	465990 [0-3.3973E+232]	0.07885	465990 [0-3.3973E+232]	0.07885	NA	NA	1.565	0.1177	++	1.565	0.1177	++	NA	NA	NA	1.503	0.1328	???+???	1.503	0.1328	???+???	NA	NA	NA
15	ACTC1	5	MISSLOF	TRUE	0.001	3 (0)	0 (0)	465990 [0-3.3973E+232]	0.07885	465990 [0-3.3973E+232]	0.07885	NA	NA	1.565	0.1177	++	1.565	0.1177	++	NA	NA	NA	1.503	0.1328	???+???	1.503	0.1328	???+???	NA	NA	NA
15	ACTC1	8	MISSLOF	FALSE	0.001	3 (0)	0 (0)	465990 [0-3.3973E+232]	0.07885	465990 [0-3.3973E+232]	0.07885	NA	NA	1.565	0.1177	++	1.565	0.1177	++	NA	NA	NA	1.503	0.1328	???+???	1.503	0.1328	???+???	NA	NA	NA
15	ACTC1	4	MISSLOF	TRUE	0.01	3 (0)	0 (0)	465990 [0-3.3973E+232]	0.07885	465990 [0-3.3973E+232]	0.07885	NA	NA	1.565	0.1177	++	1.565	0.1177	++	NA	NA	NA	1.503	0.1328	???+???	1.503	0.1328	???+???	NA	NA	NA
15	ACTC1	7	MISSLOF	FALSE	0.01	3 (0)	0 (0)	465990 [0-3.3973E+232]	0.07885	465990 [0-3.3973E+232]	0.07885	NA	NA	1.565	0.1177	++	1.565	0.1177	++	NA	NA	NA	1.503	0.1328	???+???	1.503	0.1328	???+???	NA	NA	NA
17	ACTG1	9	MISSLOF	FALSE	0.0001	3 (0)	1 (0)	0.82 [0.06-11.57]	0.88328	0.82 [0.06-11.57]	0.88328	NA	NA	0.161	0.8722	+-	0.161	0.8722	+-	NA	NA	NA	-0.322	0.7472	?+?-++?	-0.322	0.7472	?+?-++?	NA	NA	NA
17	ACTG1	8	MISSLOF	FALSE	0.001	3 (0)	1 (0)	0.82 [0.06-11.57]	0.88328	0.82 [0.06-11.57]	0.88328	NA	NA	0.161	0.8722	+-	0.161	0.8722	+-	NA	NA	NA	-0.322	0.7472	?+?-++?	-0.322	0.7472	?+?-++?	NA	NA	NA
17	ACTG1	7	MISSLOF	FALSE	0.01	3 (0)	1 (0)	0.82 [0.06-11.57]	0.88328	0.82 [0.06-11.57]	0.88328	NA	NA	0.161	0.8722	+-	0.161	0.8722	+-	NA	NA	NA	-0.322	0.7472	?+?-++?	-0.322	0.7472	?+?-++?	NA	NA	NA
2	ACTG2	6	MISSLOF	TRUE	0.0001	3 (0)	1 (0)	0.63 [0.06-6.53]	0.70663	0.63 [0.06-6.53]	0.70663	NA	NA	-0.255	0.7989	-+	-0.255	0.7989	-+	NA	NA	NA	0.489	0.6246	???+-?+	0.489	0.6246	???+-?+	NA	NA	NA
2	ACTG2	9	MISSLOF	FALSE	0.0001	3 (0)	1 (0)	0.63 [0.06-6.53]	0.70663	0.63 [0.06-6.53]	0.70663	NA	NA	-0.255	0.7989	-+	-0.255	0.7989	-+	NA	NA	NA	0.489	0.6246	???+-?+	0.489	0.6246	???+-?+	NA	NA	NA
2	ACTG2	5	MISSLOF	TRUE	0.001	3 (0)	1 (0)	0.63 [0.06-6.53]	0.70663	0.63 [0.06-6.53]	0.70663	NA	NA	-0.255	0.7989	-+	-0.255	0.7989	-+	NA	NA	NA	0.489	0.6246	???+-?+	0.489	0.6246	???+-?+	NA	NA	NA
2	ACTG2	8	MISSLOF	FALSE	0.001	3 (0)	1 (0)	0.63 [0.06-6.53]	0.70663	0.63 [0.06-6.53]	0.70663	NA	NA	-0.255	0.7989	-+	-0.255	0.7989	-+	NA	NA	NA	0.489	0.6246	???+-?+	0.489	0.6246	???+-?+	NA	NA	NA
2	ACTG2	4	MISSLOF	TRUE	0.01	3 (0)	1 (0)	0.63 [0.06-6.53]	0.70663	0.63 [0.06-6.53]	0.70663	NA	NA	-0.255	0.7989	-+	-0.255	0.7989	-+	NA	NA	NA	0.489	0.6246	???+-?+	0.489	0.6246	???+-?+	NA	NA	NA
2	ACTG2	7	MISSLOF	FALSE	0.01	3 (0)	1 (0)	0.63 [0.06-6.53]	0.70663	0.63 [0.06-6.53]	0.70663	NA	NA	-0.255	0.7989	-+	-0.255	0.7989	-+	NA	NA	NA	0.489	0.6246	???+-?+	0.489	0.6246	???+-?+	NA	NA	NA
20	ACTL10	3	LOF	-	0.0001	3 (0)	0 (0)	69530 [0-2.7834E+159]	0.24641	69530 [0-2.7834E+159]	0.24641	NA	NA	0.874	0.3823	++	0.874	0.3823	++	NA	NA	NA	1.227	0.2196	?+?+???	1.227	0.2196	?+?+???	NA	NA	NA
20	ACTL10	2	LOF	-	0.001	3 (0)	0 (0)	69530 [0-2.7834E+159]	0.24641	69530 [0-2.7834E+159]	0.24641	NA	NA	0.874	0.3823	++	0.874	0.3823	++	NA	NA	NA	1.227	0.2196	?+?+???	1.227	0.2196	?+?+???	NA	NA	NA
20	ACTL10	1	LOF	-	0.01	3 (0)	0 (0)	69530 [0-2.7834E+159]	0.24641	69530 [0-2.7834E+159]	0.24641	NA	NA	0.874	0.3823	++	0.874	0.3823	++	NA	NA	NA	1.227	0.2196	?+?+???	1.227	0.2196	?+?+???	NA	NA	NA
20	ACTL10	6	MISSLOF	TRUE	0.0001	3 (0)	0 (0)	69530 [0-2.7834E+159]	0.24641	69530 [0-2.7834E+159]	0.24641	NA	NA	0.874	0.3823	++	0.874	0.3823	++	NA	NA	NA	1.227	0.2196	?+?+???	1.227	0.2196	?+?+???	NA	NA	NA
20	ACTL10	9	MISSLOF	FALSE	0.0001	22 (0)	6 (0)	0.91 [0.33-2.48]	0.84702	0.91 [0.33-2.48]	0.84702	NA	NA	0.348	0.7277	++	0.348	0.7277	++	NA	NA	NA	-0.426	0.6703	+-+++--	-0.426	0.6703	+-+++--	NA	NA	NA
20	ACTL10	5	MISSLOF	TRUE	0.001	3 (0)	0 (0)	69530 [0-2.7834E+159]	0.24641	69530 [0-2.7834E+159]	0.24641	NA	NA	0.874	0.3823	++	0.874	0.3823	++	NA	NA	NA	1.227	0.2196	?+?+???	1.227	0.2196	?+?+???	NA	NA	NA
20	ACTL10	8	MISSLOF	FALSE	0.001	32 (0)	11 (0)	0.88 [0.41-1.9]	0.74961	0.88 [0.41-1.9]	0.74961	NA	NA	-0.162	0.8715	-+	-0.162	0.8715	-+	NA	NA	NA	0.015	0.9882	---+---	0.015	0.9882	---+---	NA	NA	NA
20	ACTL10	4	MISSLOF	TRUE	0.01	3 (0)	0 (0)	69530 [0-2.7834E+159]	0.24641	69530 [0-2.7834E+159]	0.24641	NA	NA	0.874	0.3823	++	0.874	0.3823	++	NA	NA	NA	1.227	0.2196	?+?+???	1.227	0.2196	?+?+???	NA	NA	NA
20	ACTL10	7	MISSLOF	FALSE	0.01	80 (2)	32 (1)	0.88 [0.56-1.41]	0.60902	0.9 [0.56-1.46]	0.66997	0.34 [0.02-7.22]	0.49741	-0.556	0.5785	-+	-0.492	0.6225	-+	-0.791	0.4287	-?	-0.48	0.6311	---+---	-0.484	0.6287	---+---	-0.466	0.6413	????-??
3	ACTL6A	6	MISSLOF	TRUE	0.0001	14 (0)	4 (0)	1.67 [0.48-5.85]	0.40722	1.67 [0.48-5.85]	0.40722	NA	NA	0.882	0.3779	++	0.882	0.3779	++	NA	NA	NA	1.393	0.1637	-?++-++	1.393	0.1637	-?++-++	NA	NA	NA
3	ACTL6A	9	MISSLOF	FALSE	0.0001	15 (0)	4 (0)	2.01 [0.59-6.88]	0.24786	2.01 [0.59-6.88]	0.24786	NA	NA	1.161	0.2457	++	1.161	0.2457	++	NA	NA	NA	1.525	0.1272	-?++-++	1.525	0.1272	-?++-++	NA	NA	NA
3	ACTL6A	5	MISSLOF	TRUE	0.001	15 (0)	6 (0)	1.11 [0.38-3.23]	0.84435	1.11 [0.38-3.23]	0.84435	NA	NA	0.316	0.7524	-+	0.316	0.7524	-+	NA	NA	NA	0.477	0.6335	-?++-++	0.477	0.6335	-?++-++	NA	NA	NA
3	ACTL6A	8	MISSLOF	FALSE	0.001	33 (0)	14 (0)	0.99 [0.49-2]	0.97352	0.99 [0.49-2]	0.97352	NA	NA	-0.16	0.8728	--	-0.16	0.8728	--	NA	NA	NA	-0.079	0.9368	-++--++	-0.079	0.9368	-++--++	NA	NA	NA
3	ACTL6A	4	MISSLOF	TRUE	0.01	15 (0)	6 (0)	1.11 [0.38-3.23]	0.84435	1.11 [0.38-3.23]	0.84435	NA	NA	0.316	0.7524	-+	0.316	0.7524	-+	NA	NA	NA	0.477	0.6335	-?++-++	0.477	0.6335	-?++-++	NA	NA	NA
3	ACTL6A	7	MISSLOF	FALSE	0.01	41 (1)	15 (0)	1.1 [0.57-2.15]	0.7694	1.1 [0.56-2.15]	0.78061	5476.8 [0-2.5171E+171]	0.75047	0.146	0.8841	+-	0.128	0.8984	+-	0.368	0.713	+?	0.328	0.743	-++--++	0.336	0.737	-++--++	0.297	0.7666	+??????
7	ACTL6B	6	MISSLOF	TRUE	0.0001	5 (0)	0 (0)	125110 [0-4.9353E+188]	0.18923	125110 [0-4.9353E+188]	0.18923	NA	NA	1.231	0.2182	+?	1.231	0.2182	+?	NA	NA	NA	1.001	0.3169	?+?+?+?	1.001	0.3169	?+?+?+?	NA	NA	NA
7	ACTL6B	9	MISSLOF	FALSE	0.0001	6 (0)	0 (0)	128690 [0-2.7449E+175]	0.14963	128690 [0-2.7449E+175]	0.14963	NA	NA	1.363	0.1728	+?	1.363	0.1728	+?	NA	NA	NA	1.146	0.2517	?+?+++?	1.146	0.2517	?+?+++?	NA	NA	NA
7	ACTL6B	5	MISSLOF	TRUE	0.001	5 (0)	0 (0)	125110 [0-4.9353E+188]	0.18923	125110 [0-4.9353E+188]	0.18923	NA	NA	1.231	0.2182	+?	1.231	0.2182	+?	NA	NA	NA	1.001	0.3169	?+?+?+?	1.001	0.3169	?+?+?+?	NA	NA	NA
7	ACTL6B	8	MISSLOF	FALSE	0.001	6 (0)	1 (0)	2.36 [0.2-27.19]	0.46415	2.36 [0.2-27.19]	0.46415	NA	NA	0.628	0.53	+?	0.628	0.53	+?	NA	NA	NA	1.069	0.285	?+-+++?	1.069	0.285	?+-+++?	NA	NA	NA
7	ACTL6B	4	MISSLOF	TRUE	0.01	5 (0)	0 (0)	125110 [0-4.9353E+188]	0.18923	125110 [0-4.9353E+188]	0.18923	NA	NA	1.231	0.2182	+?	1.231	0.2182	+?	NA	NA	NA	1.001	0.3169	?+?+?+?	1.001	0.3169	?+?+?+?	NA	NA	NA
7	ACTL6B	7	MISSLOF	FALSE	0.01	10 (0)	1 (0)	3.16 [0.32-31.46]	0.27178	3.16 [0.32-31.46]	0.27178	NA	NA	1.019	0.3083	++	1.019	0.3083	++	NA	NA	NA	1.514	0.1299	?+-+++?	1.514	0.1299	?+-+++?	NA	NA	NA
9	ACTL7A	3	LOF	-	0.0001	2 (0)	5 (0)	0.08 [0.01-0.56]	0.0046041	0.08 [0.01-0.56]	0.0046041	NA	NA	-2.693	0.007078	--	-2.693	0.007078	--	NA	NA	NA	-2.268	0.02333	?+?-???	-2.268	0.02333	?+?-???	NA	NA	NA
9	ACTL7A	2	LOF	-	0.001	2 (0)	5 (0)	0.08 [0.01-0.56]	0.0046041	0.08 [0.01-0.56]	0.0046041	NA	NA	-2.693	0.007078	--	-2.693	0.007078	--	NA	NA	NA	-2.268	0.02333	?+?-???	-2.268	0.02333	?+?-???	NA	NA	NA
9	ACTL7A	1	LOF	-	0.01	2 (0)	5 (0)	0.08 [0.01-0.56]	0.0046041	0.08 [0.01-0.56]	0.0046041	NA	NA	-2.693	0.007078	--	-2.693	0.007078	--	NA	NA	NA	-2.268	0.02333	?+?-???	-2.268	0.02333	?+?-???	NA	NA	NA
9	ACTL7A	6	MISSLOF	TRUE	0.0001	32 (0)	20 (0)	0.81 [0.42-1.55]	0.52601	0.81 [0.42-1.55]	0.52601	NA	NA	-0.484	0.6281	--	-0.484	0.6281	--	NA	NA	NA	-0.351	0.7254	+---+++	-0.351	0.7254	+---+++	NA	NA	NA
9	ACTL7A	9	MISSLOF	FALSE	0.0001	35 (0)	21 (0)	0.87 [0.47-1.63]	0.67144	0.87 [0.47-1.63]	0.67144	NA	NA	-0.313	0.7546	--	-0.313	0.7546	--	NA	NA	NA	-0.221	0.8251	+---+++	-0.221	0.8251	+---+++	NA	NA	NA
9	ACTL7A	5	MISSLOF	TRUE	0.001	44 (0)	24 (0)	0.78 [0.43-1.41]	0.41383	0.78 [0.43-1.41]	0.41383	NA	NA	-0.617	0.5375	--	-0.617	0.5375	--	NA	NA	NA	-0.429	0.6679	+---+++	-0.429	0.6679	+---+++	NA	NA	NA
9	ACTL7A	8	MISSLOF	FALSE	0.001	50 (0)	25 (0)	0.86 [0.49-1.5]	0.58902	0.86 [0.49-1.5]	0.58902	NA	NA	-0.393	0.6941	--	-0.393	0.6941	--	NA	NA	NA	-0.45	0.6525	+---+++	-0.45	0.6525	+---+++	NA	NA	NA
9	ACTL7A	4	MISSLOF	TRUE	0.01	72 (0)	30 (0)	1.11 [0.68-1.81]	0.6794	1.11 [0.68-1.81]	0.6794	NA	NA	0.487	0.6264	+-	0.487	0.6264	+-	NA	NA	NA	0.485	0.6274	+---+++	0.485	0.6274	+---+++	NA	NA	NA
9	ACTL7A	7	MISSLOF	FALSE	0.01	78 (0)	31 (0)	1.16 [0.72-1.87]	0.54793	1.16 [0.72-1.87]	0.54793	NA	NA	0.629	0.5292	+-	0.629	0.5292	+-	NA	NA	NA	0.45	0.653	+---+++	0.45	0.653	+---+++	NA	NA	NA
9	ACTL7B	6	MISSLOF	TRUE	0.0001	18 (0)	8 (0)	0.82 [0.32-2.09]	0.6821	0.82 [0.32-2.09]	0.6821	NA	NA	-0.558	0.5768	+-	-0.558	0.5768	+-	NA	NA	NA	0.152	0.8793	-+?+-+-	0.152	0.8793	-+?+-+-	NA	NA	NA
9	ACTL7B	9	MISSLOF	FALSE	0.0001	29 (1)	9 (0)	1.13 [0.51-2.53]	0.75675	1.04 [0.45-2.42]	0.92727	131160 [0-6.0268E+172]	0.20416	0.527	0.5979	+-	0.127	0.8989	+-	1.857	0.06331	?+	0.552	0.5812	-+++-+-	0.552	0.5812	-+++-+-	0.548	0.5835	?????+?
9	ACTL7B	5	MISSLOF	TRUE	0.001	33 (0)	13 (0)	0.99 [0.48-2.04]	0.98739	0.99 [0.48-2.04]	0.98739	NA	NA	0.282	0.7782	+-	0.282	0.7782	+-	NA	NA	NA	0.35	0.7264	-+?+-+-	0.35	0.7264	-+?+-+-	NA	NA	NA
9	ACTL7B	8	MISSLOF	FALSE	0.001	44 (1)	14 (0)	1.19 [0.62-2.28]	0.60613	1.13 [0.57-2.22]	0.7284	131160 [0-6.0268E+172]	0.20416	0.861	0.3894	+-	0.656	0.5121	+-	1.857	0.06331	?+	0.749	0.4537	-+++-+-	0.749	0.4537	-+++-+-	0.548	0.5835	?????+?
9	ACTL7B	4	MISSLOF	TRUE	0.01	92 (0)	30 (0)	0.99 [0.62-1.6]	0.97589	0.99 [0.62-1.6]	0.97589	NA	NA	0.339	0.7348	++	0.339	0.7348	++	NA	NA	NA	0.597	0.5504	--?+-+-	0.597	0.5504	--?+-+-	NA	NA	NA
9	ACTL7B	7	MISSLOF	FALSE	0.01	127 (1)	38 (0)	1.3 [0.86-1.98]	0.20594	1.28 [0.84-1.96]	0.24309	131160 [0-6.0268E+172]	0.20416	1.49	0.1362	++	1.335	0.1818	++	1.857	0.06331	?+	1.135	0.2562	--++++-	1.124	0.2612	--++++-	0.548	0.5835	?????+?
1	ACTL8	6	MISSLOF	TRUE	0.0001	4 (0)	5 (0)	0.3 [0.06-1.43]	0.12687	0.3 [0.06-1.43]	0.12687	NA	NA	-1.538	0.124	--	-1.538	0.124	--	NA	NA	NA	-1.167	0.2432	?+?--??	-1.167	0.2432	?+?--??	NA	NA	NA
1	ACTL8	9	MISSLOF	FALSE	0.0001	12 (0)	12 (0)	0.41 [0.16-1.05]	0.063953	0.41 [0.16-1.05]	0.063953	NA	NA	-1.819	0.06897	--	-1.819	0.06897	--	NA	NA	NA	-2.078	0.03776	?-?--?-	-2.078	0.03776	?-?--?-	NA	NA	NA
1	ACTL8	5	MISSLOF	TRUE	0.001	9 (0)	6 (0)	0.5 [0.15-1.69]	0.27342	0.5 [0.15-1.69]	0.27342	NA	NA	-1.087	0.2769	--	-1.087	0.2769	--	NA	NA	NA	-1.14	0.2544	?++--??	-1.14	0.2544	?++--??	NA	NA	NA
1	ACTL8	8	MISSLOF	FALSE	0.001	27 (1)	15 (0)	0.62 [0.3-1.26]	0.19495	0.6 [0.29-1.25]	0.1783	7761.1 [0-3.5665E+171]	0.70641	-1.2	0.2301	--	-1.241	0.2146	--	0.293	0.7699	?+	-1.519	0.1287	+-+--?-	-1.572	0.1159	+-+--?-	0.425	0.6712	??????+
1	ACTL8	4	MISSLOF	TRUE	0.01	15 (0)	8 (0)	0.86 [0.33-2.27]	0.7678	0.86 [0.33-2.27]	0.7678	NA	NA	-0.173	0.8627	-+	-0.173	0.8627	-+	NA	NA	NA	-0.348	0.7281	?++--??	-0.348	0.7281	?++--??	NA	NA	NA
1	ACTL8	7	MISSLOF	FALSE	0.01	88 (1)	28 (0)	0.97 [0.59-1.57]	0.8884	0.96 [0.59-1.57]	0.87427	7761.1 [0-3.5665E+171]	0.70641	0.501	0.616	++	0.493	0.6218	++	0.293	0.7699	?+	0.249	0.8035	++-++?-	0.223	0.8236	++-++?-	0.425	0.6712	??????+
19	ACTL9	3	LOF	-	0.0001	3 (0)	3 (0)	0.17 [0.03-0.99]	0.05532	0.17 [0.03-0.99]	0.05532	NA	NA	-1.758	0.07869	-+	-1.758	0.07869	-+	NA	NA	NA	-0.584	0.5592	???+-+?	-0.584	0.5592	???+-+?	NA	NA	NA
19	ACTL9	2	LOF	-	0.001	3 (0)	3 (0)	0.17 [0.03-0.99]	0.05532	0.17 [0.03-0.99]	0.05532	NA	NA	-1.758	0.07869	-+	-1.758	0.07869	-+	NA	NA	NA	-0.584	0.5592	???+-+?	-0.584	0.5592	???+-+?	NA	NA	NA
19	ACTL9	1	LOF	-	0.01	3 (0)	3 (0)	0.17 [0.03-0.99]	0.05532	0.17 [0.03-0.99]	0.05532	NA	NA	-1.758	0.07869	-+	-1.758	0.07869	-+	NA	NA	NA	-0.584	0.5592	???+-+?	-0.584	0.5592	???+-+?	NA	NA	NA
19	ACTL9	6	MISSLOF	TRUE	0.0001	20 (0)	10 (0)	0.66 [0.28-1.56]	0.35439	0.66 [0.28-1.56]	0.35439	NA	NA	-0.743	0.4577	-+	-0.743	0.4577	-+	NA	NA	NA	-0.584	0.5591	---+-++	-0.584	0.5591	---+-++	NA	NA	NA
19	ACTL9	9	MISSLOF	FALSE	0.0001	22 (0)	12 (0)	0.51 [0.23-1.13]	0.10553	0.51 [0.23-1.13]	0.10553	NA	NA	-1.382	0.167	-+	-1.382	0.167	-+	NA	NA	NA	-1.633	0.1025	---+-+-	-1.633	0.1025	---+-+-	NA	NA	NA
19	ACTL9	5	MISSLOF	TRUE	0.001	45 (0)	17 (0)	0.91 [0.48-1.74]	0.77812	0.91 [0.48-1.74]	0.77812	NA	NA	-0.153	0.8787	-+	-0.153	0.8787	-+	NA	NA	NA	-0.019	0.9846	---+-++	-0.019	0.9846	---+-++	NA	NA	NA
19	ACTL9	8	MISSLOF	FALSE	0.001	48 (0)	19 (0)	0.77 [0.41-1.44]	0.41777	0.77 [0.41-1.44]	0.41777	NA	NA	-0.614	0.5392	-+	-0.614	0.5392	-+	NA	NA	NA	-0.804	0.4214	--++-+-	-0.804	0.4214	--++-+-	NA	NA	NA
19	ACTL9	4	MISSLOF	TRUE	0.01	54 (0)	17 (0)	0.99 [0.53-1.87]	0.97434	0.99 [0.53-1.87]	0.97434	NA	NA	0.814	0.4156	++	0.814	0.4156	++	NA	NA	NA	0.221	0.8251	---+-++	0.221	0.8251	---+-++	NA	NA	NA
19	ACTL9	7	MISSLOF	FALSE	0.01	57 (0)	19 (0)	0.84 [0.46-1.55]	0.58106	0.84 [0.46-1.55]	0.58106	NA	NA	1.268	0.2048	++	1.268	0.2048	++	NA	NA	NA	-0.428	0.6686	--++-++	-0.428	0.6686	--++-++	NA	NA	NA
14	ACTN1	6	MISSLOF	TRUE	0.0001	22 (1)	14 (0)	0.55 [0.26-1.17]	0.1294	0.51 [0.23-1.13]	0.10079	18626 [0-8.5591E+171]	0.56866	-1.345	0.1785	--	-1.472	0.1409	--	0.571	0.5677	+?	-1.571	0.1161	-----++	-1.612	0.1069	-----++	0.341	0.7331	????+??
14	ACTN1	9	MISSLOF	FALSE	0.0001	27 (1)	15 (0)	0.65 [0.32-1.31]	0.23779	0.62 [0.3-1.28]	0.2018	18626 [0-8.5591E+171]	0.56866	-0.919	0.3583	-+	-1.045	0.2958	-+	0.571	0.5677	+?	-1.155	0.248	-----++	-1.211	0.2259	-----++	0.341	0.7331	????+??
14	ACTN1	5	MISSLOF	TRUE	0.001	31 (1)	15 (0)	0.81 [0.4-1.64]	0.56638	0.79 [0.38-1.62]	0.51844	18626 [0-8.5591E+171]	0.56866	-0.407	0.684	-+	-0.487	0.6266	-+	0.571	0.5677	+?	-0.176	0.86	---++++	-0.155	0.8767	---++++	0.341	0.7331	????+??
14	ACTN1	8	MISSLOF	FALSE	0.001	36 (1)	16 (0)	0.89 [0.46-1.74]	0.74225	0.87 [0.44-1.73]	0.69703	18626 [0-8.5591E+171]	0.56866	-0.069	0.9452	-+	-0.151	0.8796	-+	0.571	0.5677	+?	0.071	0.943	---+-++	0.039	0.9686	---+-++	0.341	0.7331	????+??
14	ACTN1	4	MISSLOF	TRUE	0.01	31 (1)	15 (0)	0.81 [0.4-1.64]	0.56638	0.79 [0.38-1.62]	0.51844	18626 [0-8.5591E+171]	0.56866	-0.407	0.684	-+	-0.487	0.6266	-+	0.571	0.5677	+?	-0.176	0.86	---++++	-0.155	0.8767	---++++	0.341	0.7331	????+??
14	ACTN1	7	MISSLOF	FALSE	0.01	36 (1)	16 (0)	0.89 [0.46-1.74]	0.74225	0.87 [0.44-1.73]	0.69703	18626 [0-8.5591E+171]	0.56866	-0.069	0.9452	-+	-0.151	0.8796	-+	0.571	0.5677	+?	0.071	0.943	---+-++	0.039	0.9686	---+-++	0.341	0.7331	????+??
1	ACTN2	6	MISSLOF	TRUE	0.0001	45 (0)	20 (0)	0.96 [0.51-1.81]	0.895	0.96 [0.51-1.81]	0.895	NA	NA	-1.038	0.2994	--	-1.038	0.2994	--	NA	NA	NA	0.104	0.9173	-++--+-	0.104	0.9173	-++--+-	NA	NA	NA
1	ACTN2	9	MISSLOF	FALSE	0.0001	46 (0)	22 (0)	0.95 [0.51-1.76]	0.87061	0.95 [0.51-1.76]	0.87061	NA	NA	-1.081	0.2798	--	-1.081	0.2798	--	NA	NA	NA	-0.172	0.8635	-++--+-	-0.172	0.8635	-++--+-	NA	NA	NA
1	ACTN2	5	MISSLOF	TRUE	0.001	69 (0)	37 (0)	0.85 [0.52-1.36]	0.49269	0.85 [0.52-1.36]	0.49269	NA	NA	-0.829	0.4072	--	-0.829	0.4072	--	NA	NA	NA	-0.409	0.6825	++---+-	-0.409	0.6825	++---+-	NA	NA	NA
1	ACTN2	8	MISSLOF	FALSE	0.001	78 (0)	40 (0)	0.89 [0.56-1.4]	0.61489	0.89 [0.56-1.4]	0.61489	NA	NA	-0.685	0.4933	--	-0.685	0.4933	--	NA	NA	NA	-0.103	0.9178	-+--++-	-0.103	0.9178	-+--++-	NA	NA	NA
1	ACTN2	4	MISSLOF	TRUE	0.01	109 (0)	42 (0)	1.12 [0.73-1.72]	0.59495	1.12 [0.73-1.72]	0.59495	NA	NA	0.312	0.7547	+-	0.312	0.7547	+-	NA	NA	NA	0.485	0.6276	++--++-	0.485	0.6276	++--++-	NA	NA	NA
1	ACTN2	7	MISSLOF	FALSE	0.01	177 (1)	52 (0)	1.34 [0.93-1.95]	0.11475	1.34 [0.93-1.95]	0.11607	4961.6 [0-2.2801E+171]	0.76182	0.984	0.3249	+-	0.977	0.3285	+-	0.356	0.7217	+?	-0.408	0.6833	-+--++-	-0.408	0.6833	-+--++-	NA	NA	NA
11	ACTN3	3	LOF	-	0.0001	10 (0)	7 (0)	0.77 [0.22-2.72]	0.68813	0.77 [0.22-2.72]	0.68813	NA	NA	-0.707	0.4797	--	-0.707	0.4797	--	NA	NA	NA	-0.447	0.6549	++?--++	-0.447	0.6549	++?--++	NA	NA	NA
11	ACTN3	2	LOF	-	0.001	13 (0)	10 (0)	0.61 [0.21-1.77]	0.36175	0.61 [0.21-1.77]	0.36175	NA	NA	-1.165	0.244	--	-1.165	0.244	--	NA	NA	NA	-0.897	0.3696	++?--++	-0.897	0.3696	++?--++	NA	NA	NA
11	ACTN3	1	LOF	-	0.01	34 (0)	12 (0)	1.12 [0.49-2.53]	0.79302	1.12 [0.49-2.53]	0.79302	NA	NA	-0.013	0.9896	+-	-0.013	0.9896	+-	NA	NA	NA	0.028	0.9773	++?--++	0.028	0.9773	++?--++	NA	NA	NA
11	ACTN3	6	MISSLOF	TRUE	0.0001	20 (0)	14 (0)	0.54 [0.24-1.23]	0.14606	0.54 [0.24-1.23]	0.14606	NA	NA	-1.695	0.09007	--	-1.695	0.09007	--	NA	NA	NA	-0.822	0.411	-+---++	-0.822	0.411	-+---++	NA	NA	NA
11	ACTN3	9	MISSLOF	FALSE	0.0001	83 (0)	35 (0)	0.78 [0.49-1.26]	0.31649	0.78 [0.49-1.26]	0.31649	NA	NA	-0.441	0.6595	-+	-0.441	0.6595	-+	NA	NA	NA	-0.69	0.49	++---+-	-0.69	0.49	++---+-	NA	NA	NA
11	ACTN3	5	MISSLOF	TRUE	0.001	30 (0)	18 (0)	0.68 [0.33-1.37]	0.2815	0.68 [0.33-1.37]	0.2815	NA	NA	-1.417	0.1566	--	-1.417	0.1566	--	NA	NA	NA	-0.569	0.5693	-+---++	-0.569	0.5693	-+---++	NA	NA	NA
11	ACTN3	8	MISSLOF	FALSE	0.001	147 (1)	67 (1)	0.71 [0.5-1.01]	0.056357	0.71 [0.5-1.01]	0.059705	0.45 [0.02-9.3]	0.6076	-1.947	0.05155	--	-1.931	0.0535	--	-0.46	0.6455	-?	-1.573	0.1156	-+---+-	-1.576	0.1151	-+---+-	-0.912	0.3619	??-????
11	ACTN3	4	MISSLOF	TRUE	0.01	51 (0)	20 (0)	0.94 [0.5-1.74]	0.83844	0.94 [0.5-1.74]	0.83844	NA	NA	-0.564	0.5727	--	-0.564	0.5727	--	NA	NA	NA	-0.157	0.875	++---++	-0.157	0.875	++---++	NA	NA	NA
11	ACTN3	7	MISSLOF	FALSE	0.01	442 (4)	167 (3)	0.96 [0.77-1.2]	0.7281	0.98 [0.78-1.23]	0.86299	0.28 [0.05-1.43]	0.14365	0.114	0.9096	+-	-0.058	0.954	+-	-1.469	0.1419	-?	-0.857	0.3915	-+---+-	-0.815	0.4149	-+---+-	-0.658	0.5105	-?-?+??
19	ACTN4	6	MISSLOF	TRUE	0.0001	25 (0)	12 (0)	0.77 [0.33-1.77]	0.53994	0.77 [0.33-1.77]	0.53994	NA	NA	-0.885	0.3759	--	-0.885	0.3759	--	NA	NA	NA	-0.492	0.6227	---+--+	-0.492	0.6227	---+--+	NA	NA	NA
19	ACTN4	9	MISSLOF	FALSE	0.0001	25 (0)	12 (0)	0.77 [0.33-1.77]	0.53994	0.77 [0.33-1.77]	0.53994	NA	NA	-0.885	0.3759	--	-0.885	0.3759	--	NA	NA	NA	-0.492	0.6227	---+--+	-0.492	0.6227	---+--+	NA	NA	NA
19	ACTN4	5	MISSLOF	TRUE	0.001	37 (0)	17 (1)	0.85 [0.43-1.68]	0.64442	0.93 [0.45-1.9]	0.84118	0 [0-1.3355E+162]	0.088902	-0.887	0.375	--	-1.075	0.2826	--	-1.757	0.07886	-?	-0.265	0.7912	-+-+--+	-0.244	0.8072	-+-+--+	-1.773	0.07616	????-??
19	ACTN4	8	MISSLOF	FALSE	0.001	37 (0)	17 (1)	0.85 [0.43-1.68]	0.64442	0.93 [0.45-1.9]	0.84118	0 [0-1.3355E+162]	0.088902	-0.887	0.375	--	-1.075	0.2826	--	-1.757	0.07886	-?	-0.265	0.7912	-+-+--+	-0.244	0.8072	-+-+--+	-1.773	0.07616	????-??
19	ACTN4	4	MISSLOF	TRUE	0.01	70 (0)	30 (1)	1.04 [0.62-1.72]	0.89287	1.09 [0.65-1.83]	0.73553	0 [0-1.3355E+162]	0.088902	0.171	0.8643	-+	0.04	0.9683	-+	-1.757	0.07886	-?	0.271	0.7863	---+--+	0.383	0.7016	---+--+	-1.773	0.07616	????-??
19	ACTN4	7	MISSLOF	FALSE	0.01	83 (0)	30 (1)	1.21 [0.73-1.99]	0.45272	1.28 [0.77-2.13]	0.33796	0 [0-1.3355E+162]	0.088902	0.732	0.4643	++	0.93	0.3523	++	-1.757	0.07886	-?	0.584	0.5592	---+--+	0.697	0.4858	---+--+	-1.773	0.07616	????-??
14	ACTR10	3	LOF	-	0.0001	2 (0)	1 (0)	0.38 [0.03-4.76]	0.47524	0.38 [0.03-4.76]	0.47524	NA	NA	-0.129	0.8972	+-	-0.129	0.8972	+-	NA	NA	NA	-0.604	0.546	???-+??	-0.604	0.546	???-+??	NA	NA	NA
14	ACTR10	2	LOF	-	0.001	2 (0)	1 (0)	0.38 [0.03-4.76]	0.47524	0.38 [0.03-4.76]	0.47524	NA	NA	-0.129	0.8972	+-	-0.129	0.8972	+-	NA	NA	NA	-0.604	0.546	???-+??	-0.604	0.546	???-+??	NA	NA	NA
14	ACTR10	1	LOF	-	0.01	2 (0)	1 (0)	0.38 [0.03-4.76]	0.47524	0.38 [0.03-4.76]	0.47524	NA	NA	-0.129	0.8972	+-	-0.129	0.8972	+-	NA	NA	NA	-0.604	0.546	???-+??	-0.604	0.546	???-+??	NA	NA	NA
14	ACTR10	6	MISSLOF	TRUE	0.0001	7 (0)	4 (0)	0.5 [0.13-1.99]	0.34374	0.5 [0.13-1.99]	0.34374	NA	NA	-0.669	0.5035	+-	-0.669	0.5035	+-	NA	NA	NA	-0.545	0.5856	++?-+??	-0.545	0.5856	++?-+??	NA	NA	NA
14	ACTR10	9	MISSLOF	FALSE	0.0001	17 (0)	5 (0)	1.54 [0.49-4.91]	0.44934	1.54 [0.49-4.91]	0.44934	NA	NA	1.014	0.3105	+-	1.014	0.3105	+-	NA	NA	NA	1.132	0.2577	++?++++	1.132	0.2577	++?++++	NA	NA	NA
14	ACTR10	5	MISSLOF	TRUE	0.001	13 (0)	6 (0)	0.42 [0.14-1.25]	0.13782	0.42 [0.14-1.25]	0.13782	NA	NA	0.23	0.8183	+-	0.23	0.8183	+-	NA	NA	NA	-1.145	0.2522	--?-+??	-1.145	0.2522	--?-+??	NA	NA	NA
14	ACTR10	8	MISSLOF	FALSE	0.001	31 (0)	8 (0)	1.2 [0.5-2.92]	0.67724	1.2 [0.5-2.92]	0.67724	NA	NA	1.583	0.1135	++	1.583	0.1135	++	NA	NA	NA	0.694	0.4877	--?++++	0.694	0.4877	--?++++	NA	NA	NA
14	ACTR10	4	MISSLOF	TRUE	0.01	13 (0)	6 (0)	0.42 [0.14-1.25]	0.13782	0.42 [0.14-1.25]	0.13782	NA	NA	0.23	0.8183	+-	0.23	0.8183	+-	NA	NA	NA	-1.145	0.2522	--?-+??	-1.145	0.2522	--?-+??	NA	NA	NA
14	ACTR10	7	MISSLOF	FALSE	0.01	31 (0)	8 (0)	1.2 [0.5-2.92]	0.67724	1.2 [0.5-2.92]	0.67724	NA	NA	1.583	0.1135	++	1.583	0.1135	++	NA	NA	NA	0.694	0.4877	--?++++	0.694	0.4877	--?++++	NA	NA	NA
10	ACTR1A	6	MISSLOF	TRUE	0.0001	0 (0)	3 (0)	0.07 [0-2.55]	0.034009	0.07 [0-2.55]	0.034009	NA	NA	-2.408	0.01605	--	-2.408	0.01605	--	NA	NA	NA	-2.151	0.03144	?-?--??	-2.151	0.03144	?-?--??	NA	NA	NA
10	ACTR1A	9	MISSLOF	FALSE	0.0001	7 (0)	4 (0)	0.52 [0.13-2.06]	0.36207	0.52 [0.13-2.06]	0.36207	NA	NA	-0.131	0.896	+-	-0.131	0.896	+-	NA	NA	NA	-0.777	0.4369	?-?--++	-0.777	0.4369	?-?--++	NA	NA	NA
10	ACTR1A	5	MISSLOF	TRUE	0.001	0 (0)	3 (0)	0.07 [0-2.55]	0.034009	0.07 [0-2.55]	0.034009	NA	NA	-2.408	0.01605	--	-2.408	0.01605	--	NA	NA	NA	-2.151	0.03144	?-?--??	-2.151	0.03144	?-?--??	NA	NA	NA
10	ACTR1A	8	MISSLOF	FALSE	0.001	7 (0)	4 (0)	0.52 [0.13-2.06]	0.36207	0.52 [0.13-2.06]	0.36207	NA	NA	-0.131	0.896	+-	-0.131	0.896	+-	NA	NA	NA	-0.777	0.4369	?-?--++	-0.777	0.4369	?-?--++	NA	NA	NA
10	ACTR1A	4	MISSLOF	TRUE	0.01	0 (0)	3 (0)	0.07 [0-2.55]	0.034009	0.07 [0-2.55]	0.034009	NA	NA	-2.408	0.01605	--	-2.408	0.01605	--	NA	NA	NA	-2.151	0.03144	?-?--??	-2.151	0.03144	?-?--??	NA	NA	NA
10	ACTR1A	7	MISSLOF	FALSE	0.01	7 (0)	4 (0)	0.52 [0.13-2.06]	0.36207	0.52 [0.13-2.06]	0.36207	NA	NA	-0.131	0.896	+-	-0.131	0.896	+-	NA	NA	NA	-0.777	0.4369	?-?--++	-0.777	0.4369	?-?--++	NA	NA	NA
2	ACTR1B	6	MISSLOF	TRUE	0.0001	20 (0)	7 (0)	1.98 [0.7-5.61]	0.18825	1.98 [0.7-5.61]	0.18825	NA	NA	0.308	0.7583	+-	0.308	0.7583	+-	NA	NA	NA	-0.14	0.8888	+-?--++	-0.14	0.8888	+-?--++	NA	NA	NA
2	ACTR1B	9	MISSLOF	FALSE	0.0001	28 (0)	8 (0)	2.52 [0.98-6.46]	0.044568	2.52 [0.98-6.46]	0.044568	NA	NA	1.094	0.2741	+-	1.094	0.2741	+-	NA	NA	NA	1.746	0.08088	++?++++	1.746	0.08088	++?++++	NA	NA	NA
2	ACTR1B	5	MISSLOF	TRUE	0.001	27 (0)	9 (0)	1.83 [0.73-4.58]	0.18802	1.83 [0.73-4.58]	0.18802	NA	NA	0.766	0.4438	+-	0.766	0.4438	+-	NA	NA	NA	1.31	0.1903	+-?++++	1.31	0.1903	+-?++++	NA	NA	NA
2	ACTR1B	8	MISSLOF	FALSE	0.001	36 (0)	10 (0)	2.27 [0.97-5.29]	0.049347	2.27 [0.97-5.29]	0.049347	NA	NA	1.383	0.1666	+-	1.383	0.1666	+-	NA	NA	NA	1.841	0.06563	++?++++	1.841	0.06563	++?++++	NA	NA	NA
2	ACTR1B	4	MISSLOF	TRUE	0.01	29 (0)	10 (0)	1.82 [0.77-4.29]	0.16371	1.82 [0.77-4.29]	0.16371	NA	NA	0.768	0.4422	+-	0.768	0.4422	+-	NA	NA	NA	1.329	0.184	+-?++++	1.329	0.184	+-?++++	NA	NA	NA
2	ACTR1B	7	MISSLOF	FALSE	0.01	45 (0)	13 (0)	2.37 [1.14-4.92]	0.016354	2.37 [1.14-4.92]	0.016354	NA	NA	1.564	0.1179	+-	1.564	0.1179	+-	NA	NA	NA	2.17	0.02999	++?++++	2.17	0.02999	++?++++	NA	NA	NA
2	ACTR2	9	MISSLOF	FALSE	0.0001	4 (0)	0 (0)	176230 [0-2.8096E+222]	0.18877	176230 [0-2.8096E+222]	0.18877	NA	NA	1.363	0.1729	++	1.363	0.1729	++	NA	NA	NA	1.272	0.2035	+??++??	1.272	0.2035	+??++??	NA	NA	NA
2	ACTR2	8	MISSLOF	FALSE	0.001	4 (0)	0 (0)	176230 [0-2.8096E+222]	0.18877	176230 [0-2.8096E+222]	0.18877	NA	NA	1.363	0.1729	++	1.363	0.1729	++	NA	NA	NA	1.272	0.2035	+??++??	1.272	0.2035	+??++??	NA	NA	NA
2	ACTR2	7	MISSLOF	FALSE	0.01	4 (0)	0 (0)	176230 [0-2.8096E+222]	0.18877	176230 [0-2.8096E+222]	0.18877	NA	NA	1.363	0.1729	++	1.363	0.1729	++	NA	NA	NA	1.272	0.2035	+??++??	1.272	0.2035	+??++??	NA	NA	NA
2	ACTR3	9	MISSLOF	FALSE	0.0001	3 (0)	1 (0)	0.69 [0.06-8.37]	0.77694	0.69 [0.06-8.37]	0.77694	NA	NA	-0.272	0.7857	-+	-0.272	0.7857	-+	NA	NA	NA	0.169	0.8657	?+?-??+	0.169	0.8657	?+?-??+	NA	NA	NA
2	ACTR3	8	MISSLOF	FALSE	0.001	3 (0)	1 (0)	0.69 [0.06-8.37]	0.77694	0.69 [0.06-8.37]	0.77694	NA	NA	-0.272	0.7857	-+	-0.272	0.7857	-+	NA	NA	NA	0.169	0.8657	?+?-??+	0.169	0.8657	?+?-??+	NA	NA	NA
2	ACTR3	7	MISSLOF	FALSE	0.01	8 (0)	3 (0)	0.52 [0.11-2.51]	0.43557	0.52 [0.11-2.51]	0.43557	NA	NA	-0.702	0.4829	-+	-0.702	0.4829	-+	NA	NA	NA	-0.365	0.7153	+-?-+-+	-0.365	0.7153	+-?-+-+	NA	NA	NA
7	ACTR3B	6	MISSLOF	TRUE	0.0001	6 (0)	1 (0)	4.2 [0.4-44.48]	0.18406	4.2 [0.4-44.48]	0.18406	NA	NA	1.702	0.08879	++	1.702	0.08879	++	NA	NA	NA	1.284	0.1992	???++??	1.284	0.1992	???++??	NA	NA	NA
7	ACTR3B	9	MISSLOF	FALSE	0.0001	12 (0)	3 (0)	2.05 [0.52-8.09]	0.28098	2.05 [0.52-8.09]	0.28098	NA	NA	1.22	0.2223	++	1.22	0.2223	++	NA	NA	NA	1.295	0.1953	??+++??	1.295	0.1953	??+++??	NA	NA	NA
7	ACTR3B	5	MISSLOF	TRUE	0.001	6 (0)	1 (0)	4.2 [0.4-44.48]	0.18406	4.2 [0.4-44.48]	0.18406	NA	NA	1.702	0.08879	++	1.702	0.08879	++	NA	NA	NA	1.284	0.1992	???++??	1.284	0.1992	???++??	NA	NA	NA
7	ACTR3B	8	MISSLOF	FALSE	0.001	25 (0)	7 (0)	1.75 [0.71-4.29]	0.20654	1.75 [0.71-4.29]	0.20654	NA	NA	1.517	0.1294	++	1.517	0.1294	++	NA	NA	NA	1.157	0.2474	?-+++??	1.157	0.2474	?-+++??	NA	NA	NA
7	ACTR3B	4	MISSLOF	TRUE	0.01	6 (0)	1 (0)	4.2 [0.4-44.48]	0.18406	4.2 [0.4-44.48]	0.18406	NA	NA	1.702	0.08879	++	1.702	0.08879	++	NA	NA	NA	1.284	0.1992	???++??	1.284	0.1992	???++??	NA	NA	NA
7	ACTR3B	7	MISSLOF	FALSE	0.01	25 (0)	7 (0)	1.75 [0.71-4.29]	0.20654	1.75 [0.71-4.29]	0.20654	NA	NA	1.517	0.1294	++	1.517	0.1294	++	NA	NA	NA	1.157	0.2474	?-+++??	1.157	0.2474	?-+++??	NA	NA	NA
7	ACTR3C	3	LOF	-	0.0001	1 (0)	3 (0)	0.32 [0.03-3.62]	0.33077	0.32 [0.03-3.62]	0.33077	NA	NA	-1.098	0.2722	--	-1.098	0.2722	--	NA	NA	NA	-1.083	0.2787	???-+??	-1.083	0.2787	???-+??	NA	NA	NA
7	ACTR3C	2	LOF	-	0.001	1 (0)	3 (0)	0.32 [0.03-3.62]	0.33077	0.32 [0.03-3.62]	0.33077	NA	NA	-1.098	0.2722	--	-1.098	0.2722	--	NA	NA	NA	-1.083	0.2787	???-+??	-1.083	0.2787	???-+??	NA	NA	NA
7	ACTR3C	1	LOF	-	0.01	1 (0)	3 (0)	0.32 [0.03-3.62]	0.33077	0.32 [0.03-3.62]	0.33077	NA	NA	-1.098	0.2722	--	-1.098	0.2722	--	NA	NA	NA	-1.083	0.2787	???-+??	-1.083	0.2787	???-+??	NA	NA	NA
7	ACTR3C	6	MISSLOF	TRUE	0.0001	9 (0)	5 (0)	0.69 [0.18-2.61]	0.58603	0.69 [0.18-2.61]	0.58603	NA	NA	-0.51	0.6098	--	-0.51	0.6098	--	NA	NA	NA	-0.082	0.9346	++?-+?+	-0.082	0.9346	++?-+?+	NA	NA	NA
7	ACTR3C	9	MISSLOF	FALSE	0.0001	11 (0)	6 (0)	0.59 [0.18-1.96]	0.40118	0.59 [0.18-1.96]	0.40118	NA	NA	-0.824	0.4102	--	-0.824	0.4102	--	NA	NA	NA	-0.588	0.5567	++?--?+	-0.588	0.5567	++?--?+	NA	NA	NA
7	ACTR3C	5	MISSLOF	TRUE	0.001	9 (0)	6 (0)	0.56 [0.16-1.96]	0.37487	0.56 [0.16-1.96]	0.37487	NA	NA	-0.884	0.3767	--	-0.884	0.3767	--	NA	NA	NA	-0.349	0.7273	-+?-+?+	-0.349	0.7273	-+?-+?+	NA	NA	NA
7	ACTR3C	8	MISSLOF	FALSE	0.001	12 (0)	8 (0)	0.58 [0.2-1.71]	0.33042	0.58 [0.2-1.71]	0.33042	NA	NA	-1.024	0.3056	--	-1.024	0.3056	--	NA	NA	NA	-0.835	0.4039	-+?--++	-0.835	0.4039	-+?--++	NA	NA	NA
7	ACTR3C	4	MISSLOF	TRUE	0.01	39 (0)	21 (0)	0.81 [0.43-1.54]	0.53029	0.81 [0.43-1.54]	0.53029	NA	NA	-0.456	0.6481	--	-0.456	0.6481	--	NA	NA	NA	-0.462	0.6439	-+?-+-+	-0.462	0.6439	-+?-+-+	NA	NA	NA
7	ACTR3C	7	MISSLOF	FALSE	0.01	71 (0)	27 (0)	1.01 [0.59-1.73]	0.96971	1.01 [0.59-1.73]	0.96971	NA	NA	0.092	0.9269	+-	0.092	0.9269	+-	NA	NA	NA	-0.526	0.599	-+--+--	-0.526	0.599	-+--+--	NA	NA	NA
20	ACTR5	3	LOF	-	0.0001	6 (0)	2 (0)	0.81 [0.13-5.17]	0.8286	0.81 [0.13-5.17]	0.8286	NA	NA	-0.121	0.9036	-+	-0.121	0.9036	-+	NA	NA	NA	0.595	0.552	+-?+-?+	0.595	0.552	+-?+-?+	NA	NA	NA
20	ACTR5	2	LOF	-	0.001	6 (0)	2 (0)	0.81 [0.13-5.17]	0.8286	0.81 [0.13-5.17]	0.8286	NA	NA	-0.121	0.9036	-+	-0.121	0.9036	-+	NA	NA	NA	0.595	0.552	+-?+-?+	0.595	0.552	+-?+-?+	NA	NA	NA
20	ACTR5	1	LOF	-	0.01	6 (0)	2 (0)	0.81 [0.13-5.17]	0.8286	0.81 [0.13-5.17]	0.8286	NA	NA	-0.121	0.9036	-+	-0.121	0.9036	-+	NA	NA	NA	0.595	0.552	+-?+-?+	0.595	0.552	+-?+-?+	NA	NA	NA
20	ACTR5	6	MISSLOF	TRUE	0.0001	43 (0)	16 (0)	1.13 [0.58-2.19]	0.71752	1.13 [0.58-2.19]	0.71752	NA	NA	0.313	0.7546	-+	0.313	0.7546	-+	NA	NA	NA	0.48	0.6309	+-+--++	0.48	0.6309	+-+--++	NA	NA	NA
20	ACTR5	9	MISSLOF	FALSE	0.0001	49 (0)	17 (0)	1.17 [0.62-2.21]	0.62867	1.17 [0.62-2.21]	0.62867	NA	NA	0.441	0.6594	-+	0.441	0.6594	-+	NA	NA	NA	0.546	0.5848	+-+--++	0.546	0.5848	+-+--++	NA	NA	NA
20	ACTR5	5	MISSLOF	TRUE	0.001	50 (0)	16 (0)	1.2 [0.62-2.3]	0.58904	1.2 [0.62-2.3]	0.58904	NA	NA	0.524	0.6002	-+	0.524	0.6002	-+	NA	NA	NA	0.594	0.5526	+-+--++	0.594	0.5526	+-+--++	NA	NA	NA
20	ACTR5	8	MISSLOF	FALSE	0.001	63 (0)	20 (0)	1.35 [0.75-2.42]	0.31488	1.35 [0.75-2.42]	0.31488	NA	NA	1.186	0.2356	-+	1.186	0.2356	-+	NA	NA	NA	0.618	0.5366	+-+--++	0.618	0.5366	+-+--++	NA	NA	NA
20	ACTR5	4	MISSLOF	TRUE	0.01	93 (1)	26 (0)	1.16 [0.7-1.93]	0.56341	1.16 [0.7-1.93]	0.56919	4494 [0-2.0653E+171]	0.77275	0.574	0.5662	++	0.562	0.5739	++	0.316	0.7519	+?	0.747	0.4551	-++-+++	0.747	0.4551	-++-+++	0.34	0.7338	??????+
20	ACTR5	7	MISSLOF	FALSE	0.01	106 (1)	30 (0)	1.26 [0.78-2.03]	0.33496	1.26 [0.78-2.03]	0.33853	4494 [0-2.0653E+171]	0.77275	1.131	0.2583	++	1.119	0.263	++	0.316	0.7519	+?	1.141	0.2541	-++-+++	1.141	0.2541	-++-+++	0.34	0.7338	??????+
12	ACTR6	3	LOF	-	0.0001	3 (0)	0 (0)	175110 [0-5.3526E+240]	0.2415	175110 [0-5.3526E+240]	0.2415	NA	NA	1.095	0.2737	++	1.095	0.2737	++	NA	NA	NA	0.936	0.349	???+??+	0.936	0.349	???+??+	NA	NA	NA
12	ACTR6	2	LOF	-	0.001	3 (0)	0 (0)	175110 [0-5.3526E+240]	0.2415	175110 [0-5.3526E+240]	0.2415	NA	NA	1.095	0.2737	++	1.095	0.2737	++	NA	NA	NA	0.936	0.349	???+??+	0.936	0.349	???+??+	NA	NA	NA
12	ACTR6	1	LOF	-	0.01	3 (0)	0 (0)	175110 [0-5.3526E+240]	0.2415	175110 [0-5.3526E+240]	0.2415	NA	NA	1.095	0.2737	++	1.095	0.2737	++	NA	NA	NA	0.936	0.349	???+??+	0.936	0.349	???+??+	NA	NA	NA
12	ACTR6	6	MISSLOF	TRUE	0.0001	4 (0)	3 (0)	1.18 [0.2-6.88]	0.85424	1.18 [0.2-6.88]	0.85424	NA	NA	-0.392	0.6949	--	-0.392	0.6949	--	NA	NA	NA	0.241	0.8096	?-?+??+	0.241	0.8096	?-?+??+	NA	NA	NA
12	ACTR6	9	MISSLOF	FALSE	0.0001	7 (0)	7 (0)	1.06 [0.31-3.69]	0.92518	1.06 [0.31-3.69]	0.92518	NA	NA	-0.284	0.7767	--	-0.284	0.7767	--	NA	NA	NA	-0.261	0.7938	?-?--?+	-0.261	0.7938	?-?--?+	NA	NA	NA
12	ACTR6	5	MISSLOF	TRUE	0.001	4 (0)	3 (0)	1.18 [0.2-6.88]	0.85424	1.18 [0.2-6.88]	0.85424	NA	NA	-0.392	0.6949	--	-0.392	0.6949	--	NA	NA	NA	0.241	0.8096	?-?+??+	0.241	0.8096	?-?+??+	NA	NA	NA
12	ACTR6	8	MISSLOF	FALSE	0.001	11 (0)	12 (0)	0.78 [0.29-2.11]	0.61973	0.78 [0.29-2.11]	0.61973	NA	NA	-1.247	0.2125	--	-1.247	0.2125	--	NA	NA	NA	-1.042	0.2973	--?--?+	-1.042	0.2973	--?--?+	NA	NA	NA
12	ACTR6	4	MISSLOF	TRUE	0.01	4 (0)	3 (0)	1.18 [0.2-6.88]	0.85424	1.18 [0.2-6.88]	0.85424	NA	NA	-0.392	0.6949	--	-0.392	0.6949	--	NA	NA	NA	0.241	0.8096	?-?+??+	0.241	0.8096	?-?+??+	NA	NA	NA
12	ACTR6	7	MISSLOF	FALSE	0.01	11 (0)	12 (0)	0.78 [0.29-2.11]	0.61973	0.78 [0.29-2.11]	0.61973	NA	NA	-1.247	0.2125	--	-1.247	0.2125	--	NA	NA	NA	-1.042	0.2973	--?--?+	-1.042	0.2973	--?--?+	NA	NA	NA
3	ACTR8	3	LOF	-	0.0001	7 (0)	3 (0)	1.25 [0.26-5.99]	0.77722	1.25 [0.26-5.99]	0.77722	NA	NA	-0.153	0.878	-?	-0.153	0.878	-?	NA	NA	NA	0.163	0.8704	?++-?++	0.163	0.8704	?++-?++	NA	NA	NA
3	ACTR8	2	LOF	-	0.001	7 (0)	3 (0)	1.25 [0.26-5.99]	0.77722	1.25 [0.26-5.99]	0.77722	NA	NA	-0.153	0.878	-?	-0.153	0.878	-?	NA	NA	NA	0.163	0.8704	?++-?++	0.163	0.8704	?++-?++	NA	NA	NA
3	ACTR8	1	LOF	-	0.01	7 (0)	3 (0)	1.25 [0.26-5.99]	0.77722	1.25 [0.26-5.99]	0.77722	NA	NA	-0.153	0.878	-?	-0.153	0.878	-?	NA	NA	NA	0.163	0.8704	?++-?++	0.163	0.8704	?++-?++	NA	NA	NA
3	ACTR8	6	MISSLOF	TRUE	0.0001	28 (0)	20 (0)	0.88 [0.45-1.72]	0.70342	0.88 [0.45-1.72]	0.70342	NA	NA	-0.31	0.7562	--	-0.31	0.7562	--	NA	NA	NA	-0.092	0.9269	++---++	-0.092	0.9269	++---++	NA	NA	NA
3	ACTR8	9	MISSLOF	FALSE	0.0001	30 (0)	20 (0)	0.89 [0.45-1.74]	0.73063	0.89 [0.45-1.74]	0.73063	NA	NA	-0.271	0.7868	--	-0.271	0.7868	--	NA	NA	NA	-0.034	0.9731	++---++	-0.034	0.9731	++---++	NA	NA	NA
3	ACTR8	5	MISSLOF	TRUE	0.001	38 (0)	23 (0)	0.88 [0.48-1.62]	0.6784	0.88 [0.48-1.62]	0.6784	NA	NA	-0.513	0.6083	--	-0.513	0.6083	--	NA	NA	NA	-0.681	0.4961	+-----+	-0.681	0.4961	+-----+	NA	NA	NA
3	ACTR8	8	MISSLOF	FALSE	0.001	40 (0)	23 (0)	0.89 [0.48-1.63]	0.70265	0.89 [0.48-1.63]	0.70265	NA	NA	-0.475	0.6346	--	-0.475	0.6346	--	NA	NA	NA	-0.635	0.5252	+-----+	-0.635	0.5252	+-----+	NA	NA	NA
3	ACTR8	4	MISSLOF	TRUE	0.01	57 (1)	25 (0)	0.95 [0.55-1.66]	0.86362	0.94 [0.54-1.66]	0.83583	13819 [0-6.3503E+171]	0.61999	0.019	0.9852	+-	-0.462	0.6443	--	0.43	0.6669	+?	-0.458	0.647	++----+	-0.437	0.6618	++----+	0.403	0.687	?+?????
3	ACTR8	7	MISSLOF	FALSE	0.01	59 (1)	25 (0)	0.96 [0.55-1.67]	0.88646	0.95 [0.54-1.67]	0.85891	13819 [0-6.3503E+171]	0.61999	-0.015	0.9882	+-	0.013	0.9893	+-	0.43	0.6669	+?	-0.413	0.6799	++----+	-0.392	0.695	++----+	0.403	0.687	?+?????
X	ACTRT1	1	LOF	-	0.01	9 (4)	5 (2)	0.73 [0.31-1.73]	0.48295	0.55 [0.12-2.66]	0.46994	0.55 [0.09-3.38]	0.53217	-0.537	0.591	-+	-0.54	0.589	-+	-0.452	0.6511	-+	-0.541	0.5887	?-?-???	-0.775	0.4384	?-?-???	0.223	0.8236	?-?+???
X	ACTRT1	6	MISSLOF	TRUE	0.0001	14 (5)	9 (1)	0.85 [0.37-1.97]	0.71513	0.81 [0.26-2.49]	0.71395	0.77 [0.08-7.21]	0.82002	-0.927	0.3541	--	-0.806	0.4203	--	0.311	0.7558	+-	-0.651	0.5147	?-+-+?+	-1.012	0.3117	?-+--?+	-0.093	0.9259	??+-+?+
X	ACTRT1	9	MISSLOF	FALSE	0.0001	15 (5)	9 (1)	0.87 [0.38-2]	0.74439	0.84 [0.28-2.53]	0.75325	0.77 [0.08-7.21]	0.82002	-0.963	0.3356	--	-0.85	0.3953	--	0.311	0.7558	+-	-0.643	0.52	?-+-+?+	-1.004	0.3156	?-+--?+	-0.093	0.9259	??+-+?+
X	ACTRT1	5	MISSLOF	TRUE	0.001	17 (5)	10 (1)	0.88 [0.4-1.96]	0.76184	0.87 [0.31-2.38]	0.77917	0.77 [0.08-7.21]	0.82002	-0.92	0.3577	--	-0.815	0.4152	--	0.311	0.7558	+-	-0.975	0.3297	--+-+?+	-1.323	0.1858	--+--?+	-0.093	0.9259	??+-+?+
X	ACTRT1	8	MISSLOF	FALSE	0.001	27 (9)	13 (1)	0.93 [0.47-1.84]	0.82977	0.85 [0.35-2.05]	0.71212	1.26 [0.15-10.74]	0.8273	-0.22	0.8262	+-	-0.933	0.3508	--	1.597	0.1102	++	0.033	0.974	-++-+?+	-0.495	0.6205	-++--?+	0.287	0.7744	+++-+?+
X	ACTRT1	4	MISSLOF	TRUE	0.01	60 (21)	27 (6)	0.74 [0.49-1.13]	0.17729	0.64 [0.34-1.2]	0.16833	0.6 [0.23-1.6]	0.32955	-0.14	0.889	-+	-1.713	0.08671	--	1.007	0.3137	++	-1.259	0.2081	--+---+	-1.632	0.1027	--+---+	0.961	0.3363	+-+++?+
X	ACTRT1	7	MISSLOF	FALSE	0.01	84 (29)	32 (7)	0.85 [0.58-1.24]	0.4089	0.78 [0.44-1.36]	0.38125	0.78 [0.32-1.91]	0.59129	0.938	0.3483	++	-1.129	0.259	--	0.502	0.6159	++	-0.393	0.6944	--+-+-+	-1.3	0.1936	--+---+	0.934	0.3504	+-+++?+
1	ACTRT2	3	LOF	-	0.0001	3 (0)	1 (0)	0.7 [0.06-8.37]	0.78498	0.7 [0.06-8.37]	0.78498	NA	NA	-0.191	0.8482	-+	-0.191	0.8482	-+	NA	NA	NA	-0.748	0.4544	???-++?	-0.748	0.4544	???-++?	NA	NA	NA
1	ACTRT2	2	LOF	-	0.001	3 (0)	1 (0)	0.7 [0.06-8.37]	0.78498	0.7 [0.06-8.37]	0.78498	NA	NA	-0.191	0.8482	-+	-0.191	0.8482	-+	NA	NA	NA	-0.748	0.4544	???-++?	-0.748	0.4544	???-++?	NA	NA	NA
1	ACTRT2	1	LOF	-	0.01	3 (0)	1 (0)	0.7 [0.06-8.37]	0.78498	0.7 [0.06-8.37]	0.78498	NA	NA	-0.191	0.8482	-+	-0.191	0.8482	-+	NA	NA	NA	-0.748	0.4544	???-++?	-0.748	0.4544	???-++?	NA	NA	NA
1	ACTRT2	6	MISSLOF	TRUE	0.0001	22 (0)	6 (0)	1.11 [0.42-2.92]	0.83627	1.11 [0.42-2.92]	0.83627	NA	NA	0.491	0.6233	++	0.491	0.6233	++	NA	NA	NA	1.969	0.049	-+?++++	1.969	0.049	-+?++++	NA	NA	NA
1	ACTRT2	9	MISSLOF	FALSE	0.0001	34 (0)	6 (0)	1.74 [0.69-4.4]	0.21648	1.74 [0.69-4.4]	0.21648	NA	NA	1.196	0.2317	++	1.196	0.2317	++	NA	NA	NA	2.351	0.01874	-+?++++	2.351	0.01874	-+?++++	NA	NA	NA
1	ACTRT2	5	MISSLOF	TRUE	0.001	29 (0)	10 (0)	0.84 [0.38-1.85]	0.66183	0.84 [0.38-1.85]	0.66183	NA	NA	-0.394	0.6936	-+	-0.394	0.6936	-+	NA	NA	NA	-0.287	0.7741	-+?-++-	-0.287	0.7741	-+?-++-	NA	NA	NA
1	ACTRT2	8	MISSLOF	FALSE	0.001	59 (0)	10 (0)	1.77 [0.86-3.65]	0.10115	1.77 [0.86-3.65]	0.10115	NA	NA	1.601	0.1094	++	1.601	0.1094	++	NA	NA	NA	0.494	0.6213	-++-+++	0.494	0.6213	-++-+++	NA	NA	NA
1	ACTRT2	4	MISSLOF	TRUE	0.01	82 (1)	20 (0)	1.03 [0.59-1.78]	0.92895	1.02 [0.59-1.78]	0.93646	3785.9 [0-1.7398E+171]	0.79061	1.267	0.2053	++	1.279	0.201	++	0.275	0.7835	+?	-0.423	0.6721	-+?-++-	-0.428	0.6685	-+?-++-	0.212	0.8317	?????+?
1	ACTRT2	7	MISSLOF	FALSE	0.01	126 (1)	24 (0)	1.54 [0.94-2.51]	0.078249	1.53 [0.94-2.51]	0.079053	3785.9 [0-1.7398E+171]	0.79061	1.83	0.06728	++	1.824	0.06809	++	0.275	0.7835	+?	1.451	0.1469	--+++++	1.448	0.1476	--+++++	0.212	0.8317	?????+?
3	ACTRT3	9	MISSLOF	FALSE	0.0001	8 (0)	6 (0)	0.85 [0.24-2.93]	0.79294	0.85 [0.24-2.93]	0.79294	NA	NA	-0.398	0.6906	-+	-0.398	0.6906	-+	NA	NA	NA	-0.131	0.8954	?---+++	-0.131	0.8954	?---+++	NA	NA	NA
3	ACTRT3	8	MISSLOF	FALSE	0.001	19 (0)	6 (0)	1.44 [0.49-4.23]	0.50586	1.44 [0.49-4.23]	0.50586	NA	NA	0.646	0.5181	++	0.646	0.5181	++	NA	NA	NA	0.102	0.9185	+---+++	0.102	0.9185	+---+++	NA	NA	NA
3	ACTRT3	7	MISSLOF	FALSE	0.01	42 (0)	14 (0)	1.64 [0.81-3.32]	0.15662	1.64 [0.81-3.32]	0.15662	NA	NA	1.072	0.2838	-+	1.072	0.2838	-+	NA	NA	NA	1.183	0.2367	+--+-++	1.183	0.2367	+--+-++	NA	NA	NA
2	ACVR1	6	MISSLOF	TRUE	0.0001	9 (0)	8 (1)	0.39 [0.13-1.16]	0.084543	0.39 [0.12-1.25]	0.11746	0 [0-2.8053E+162]	0.17166	-1.79	0.07346	--	-1.613	0.1067	--	-1.511	0.1309	-?	-1.165	0.2441	-+?-+-+	-1.095	0.2735	-+?-+-+	-1.776	0.07569	?????-?
2	ACVR1	9	MISSLOF	FALSE	0.0001	13 (0)	10 (1)	0.47 [0.19-1.17]	0.10618	0.48 [0.19-1.27]	0.14655	0 [0-2.8053E+162]	0.17166	-1.732	0.08319	--	-1.555	0.1198	--	-1.511	0.1309	-?	-1.163	0.2446	-+?-+--	-1.087	0.2769	-+?-+--	-1.776	0.07569	?????-?
2	ACVR1	5	MISSLOF	TRUE	0.001	10 (0)	9 (1)	0.4 [0.14-1.16]	0.085761	0.4 [0.13-1.25]	0.11916	0 [0-2.8053E+162]	0.17166	-1.749	0.08022	--	-1.565	0.1177	--	-1.511	0.1309	-?	-1.045	0.2961	-+?-+-+	-0.975	0.3294	-+?-+-+	-1.776	0.07569	?????-?
2	ACVR1	8	MISSLOF	FALSE	0.001	15 (0)	11 (1)	0.55 [0.23-1.3]	0.17424	0.57 [0.22-1.44]	0.23898	0 [0-2.8053E+162]	0.17166	-1.479	0.1392	--	-1.278	0.2013	--	-1.511	0.1309	-?	-0.762	0.4462	-+?-+--	-0.685	0.4931	-+?-+--	-1.776	0.07569	?????-?
2	ACVR1	4	MISSLOF	TRUE	0.01	96 (2)	38 (1)	1.26 [0.82-1.94]	0.27723	1.29 [0.83-2.01]	0.25362	0.94 [0.08-10.77]	0.95934	1.098	0.2721	++	1.19	0.2339	++	-0.215	0.8297	-?	1.095	0.2733	-+?++-+	1.141	0.2541	-+?++-+	-0.073	0.9416	????+-+
2	ACVR1	7	MISSLOF	FALSE	0.01	101 (2)	40 (1)	1.26 [0.83-1.91]	0.27091	1.29 [0.84-1.98]	0.24861	0.94 [0.08-10.77]	0.95934	1.075	0.2824	++	1.16	0.2461	++	-0.215	0.8297	-?	0.787	0.4315	-+?++--	0.844	0.3985	-+?++--	-0.073	0.9416	????+-+
12	ACVR1B	6	MISSLOF	TRUE	0.0001	3 (0)	0 (0)	224060 [0-1.0109E+240]	0.19126	224060 [0-1.0109E+240]	0.19126	NA	NA	1.315	0.1886	++	1.315	0.1886	++	NA	NA	NA	1.128	0.2592	+?++???	1.128	0.2592	+?++???	NA	NA	NA
12	ACVR1B	9	MISSLOF	FALSE	0.0001	9 (0)	1 (0)	3.02 [0.35-26.25]	0.26136	3.02 [0.35-26.25]	0.26136	NA	NA	1.18	0.238	++	1.18	0.238	++	NA	NA	NA	0.98	0.3272	+++++?+	0.98	0.3272	+++++?+	NA	NA	NA
12	ACVR1B	5	MISSLOF	TRUE	0.001	3 (0)	0 (0)	224060 [0-1.0109E+240]	0.19126	224060 [0-1.0109E+240]	0.19126	NA	NA	1.315	0.1886	++	1.315	0.1886	++	NA	NA	NA	1.128	0.2592	+?++???	1.128	0.2592	+?++???	NA	NA	NA
12	ACVR1B	8	MISSLOF	FALSE	0.001	9 (0)	1 (0)	3.02 [0.35-26.25]	0.26136	3.02 [0.35-26.25]	0.26136	NA	NA	1.18	0.238	++	1.18	0.238	++	NA	NA	NA	0.98	0.3272	+++++?+	0.98	0.3272	+++++?+	NA	NA	NA
12	ACVR1B	4	MISSLOF	TRUE	0.01	3 (0)	0 (0)	224060 [0-1.0109E+240]	0.19126	224060 [0-1.0109E+240]	0.19126	NA	NA	1.315	0.1886	++	1.315	0.1886	++	NA	NA	NA	1.128	0.2592	+?++???	1.128	0.2592	+?++???	NA	NA	NA
12	ACVR1B	7	MISSLOF	FALSE	0.01	9 (0)	1 (0)	3.02 [0.35-26.25]	0.26136	3.02 [0.35-26.25]	0.26136	NA	NA	1.18	0.238	++	1.18	0.238	++	NA	NA	NA	0.98	0.3272	+++++?+	0.98	0.3272	+++++?+	NA	NA	NA
2	ACVR1C	6	MISSLOF	TRUE	0.0001	11 (0)	4 (0)	1.23 [0.36-4.17]	0.74085	1.23 [0.36-4.17]	0.74085	NA	NA	0.477	0.6336	+-	0.477	0.6336	+-	NA	NA	NA	0.827	0.4083	++?-+++	0.827	0.4083	++?-+++	NA	NA	NA
2	ACVR1C	9	MISSLOF	FALSE	0.0001	17 (0)	6 (0)	1.4 [0.5-3.98]	0.51525	1.4 [0.5-3.98]	0.51525	NA	NA	1.001	0.3166	+-	1.001	0.3166	+-	NA	NA	NA	0.948	0.343	+++-+++	0.948	0.343	+++-+++	NA	NA	NA
2	ACVR1C	5	MISSLOF	TRUE	0.001	21 (0)	8 (0)	1.16 [0.47-2.89]	0.7466	1.16 [0.47-2.89]	0.7466	NA	NA	0.076	0.9397	+-	0.076	0.9397	+-	NA	NA	NA	0.154	0.878	+++--++	0.154	0.878	+++--++	NA	NA	NA
2	ACVR1C	8	MISSLOF	FALSE	0.001	27 (0)	10 (0)	1.28 [0.56-2.93]	0.5547	1.28 [0.56-2.93]	0.5547	NA	NA	0.594	0.5524	+-	0.594	0.5524	+-	NA	NA	NA	-0.011	0.991	+++--++	-0.011	0.991	+++--++	NA	NA	NA
2	ACVR1C	4	MISSLOF	TRUE	0.01	21 (0)	8 (0)	1.16 [0.47-2.89]	0.7466	1.16 [0.47-2.89]	0.7466	NA	NA	0.076	0.9397	+-	0.076	0.9397	+-	NA	NA	NA	0.154	0.878	+++--++	0.154	0.878	+++--++	NA	NA	NA
2	ACVR1C	7	MISSLOF	FALSE	0.01	59 (0)	23 (0)	1.33 [0.77-2.31]	0.29793	1.33 [0.77-2.31]	0.29793	NA	NA	0.849	0.3956	+-	0.849	0.3956	+-	NA	NA	NA	1.055	0.2912	++++-++	1.055	0.2912	++++-++	NA	NA	NA
2	ACVR2A	9	MISSLOF	FALSE	0.0001	6 (0)	4 (0)	0.43 [0.1-1.77]	0.25317	0.43 [0.1-1.77]	0.25317	NA	NA	-1.232	0.218	--	-1.232	0.218	--	NA	NA	NA	-1.128	0.2595	+?+--?+	-1.128	0.2595	+?+--?+	NA	NA	NA
2	ACVR2A	8	MISSLOF	FALSE	0.001	9 (0)	6 (0)	0.46 [0.15-1.47]	0.2029	0.46 [0.15-1.47]	0.2029	NA	NA	-1.413	0.1576	--	-1.413	0.1576	--	NA	NA	NA	-1.386	0.1658	+?+--?+	-1.386	0.1658	+?+--?+	NA	NA	NA
2	ACVR2A	7	MISSLOF	FALSE	0.01	9 (0)	6 (0)	0.46 [0.15-1.47]	0.2029	0.46 [0.15-1.47]	0.2029	NA	NA	-1.413	0.1576	--	-1.413	0.1576	--	NA	NA	NA	-1.386	0.1658	+?+--?+	-1.386	0.1658	+?+--?+	NA	NA	NA
3	ACVR2B	6	MISSLOF	TRUE	0.0001	15 (0)	5 (0)	0.9 [0.29-2.79]	0.85006	0.9 [0.29-2.79]	0.85006	NA	NA	0.32	0.7492	++	0.32	0.7492	++	NA	NA	NA	0.273	0.785	++?+-+?	0.273	0.785	++?+-+?	NA	NA	NA
3	ACVR2B	9	MISSLOF	FALSE	0.0001	22 (0)	8 (0)	0.96 [0.39-2.41]	0.93647	0.96 [0.39-2.41]	0.93647	NA	NA	0.442	0.6588	++	0.442	0.6588	++	NA	NA	NA	0.181	0.8567	+-++-+?	0.181	0.8567	+-++-+?	NA	NA	NA
3	ACVR2B	5	MISSLOF	TRUE	0.001	19 (0)	6 (0)	0.91 [0.33-2.5]	0.85785	0.91 [0.33-2.5]	0.85785	NA	NA	0.34	0.7337	++	0.34	0.7337	++	NA	NA	NA	0.287	0.7738	++?+-+-	0.287	0.7738	++?+-+-	NA	NA	NA
3	ACVR2B	8	MISSLOF	FALSE	0.001	26 (0)	9 (0)	0.96 [0.41-2.25]	0.93401	0.96 [0.41-2.25]	0.93401	NA	NA	0.464	0.6425	++	0.464	0.6425	++	NA	NA	NA	0.11	0.9122	+-++-+-	0.11	0.9122	+-++-+-	NA	NA	NA
3	ACVR2B	4	MISSLOF	TRUE	0.01	32 (0)	10 (0)	0.73 [0.33-1.62]	0.44228	0.73 [0.33-1.62]	0.44228	NA	NA	0.852	0.3942	++	0.852	0.3942	++	NA	NA	NA	-1.126	0.2604	+-?+---	-1.126	0.2604	+-?+---	NA	NA	NA
3	ACVR2B	7	MISSLOF	FALSE	0.01	39 (0)	13 (0)	0.8 [0.39-1.62]	0.53524	0.8 [0.39-1.62]	0.53524	NA	NA	0.94	0.3472	++	0.94	0.3472	++	NA	NA	NA	-0.502	0.6159	+-+++--	-0.502	0.6159	+-+++--	NA	NA	NA
12	ACVRL1	6	MISSLOF	TRUE	0.0001	23 (0)	10 (0)	0.89 [0.37-2.17]	0.79868	0.89 [0.37-2.17]	0.79868	NA	NA	-0.003	0.9979	+-	-0.003	0.9979	+-	NA	NA	NA	-0.686	0.4926	+----++	-0.686	0.4926	+----++	NA	NA	NA
12	ACVRL1	9	MISSLOF	FALSE	0.0001	23 (0)	11 (0)	0.84 [0.35-2]	0.69692	0.84 [0.35-2]	0.69692	NA	NA	-0.057	0.9548	+-	-0.057	0.9548	+-	NA	NA	NA	-0.745	0.4562	+----++	-0.745	0.4562	+----++	NA	NA	NA
12	ACVRL1	5	MISSLOF	TRUE	0.001	32 (0)	13 (0)	0.98 [0.46-2.12]	0.9647	0.98 [0.46-2.12]	0.9647	NA	NA	0.016	0.9875	+-	0.016	0.9875	+-	NA	NA	NA	-0.158	0.8746	+--+-+-	-0.158	0.8746	+--+-+-	NA	NA	NA
12	ACVRL1	8	MISSLOF	FALSE	0.001	38 (0)	16 (0)	0.94 [0.47-1.88]	0.85535	0.94 [0.47-1.88]	0.85535	NA	NA	0.127	0.8993	+-	0.127	0.8993	+-	NA	NA	NA	-0.288	0.7735	+--+-+-	-0.288	0.7735	+--+-+-	NA	NA	NA
12	ACVRL1	4	MISSLOF	TRUE	0.01	37 (0)	15 (0)	1.08 [0.53-2.2]	0.83938	1.08 [0.53-2.2]	0.83938	NA	NA	0.038	0.9694	+-	0.038	0.9694	+-	NA	NA	NA	-0.202	0.8396	---+-+-	-0.202	0.8396	---+-+-	NA	NA	NA
12	ACVRL1	7	MISSLOF	FALSE	0.01	43 (0)	18 (0)	1.02 [0.53-1.95]	0.95728	1.02 [0.53-1.95]	0.95728	NA	NA	-0.052	0.9589	+-	-0.052	0.9589	+-	NA	NA	NA	-0.387	0.699	---+-+-	-0.387	0.699	---+-+-	NA	NA	NA
3	ACY1	3	LOF	-	0.0001	4 (0)	2 (0)	1.1 [0.19-6.4]	0.91832	1.1 [0.19-6.4]	0.91832	NA	NA	0.32	0.749	-+	0.32	0.749	-+	NA	NA	NA	0.706	0.4801	???+??+	0.706	0.4801	???+??+	NA	NA	NA
3	ACY1	2	LOF	-	0.001	8 (0)	2 (0)	1.57 [0.31-8.01]	0.57493	1.57 [0.31-8.01]	0.57493	NA	NA	0.386	0.6995	-+	0.386	0.6995	-+	NA	NA	NA	0.638	0.5234	???++++	0.638	0.5234	???++++	NA	NA	NA
3	ACY1	1	LOF	-	0.01	8 (0)	2 (0)	1.57 [0.31-8.01]	0.57493	1.57 [0.31-8.01]	0.57493	NA	NA	0.386	0.6995	-+	0.386	0.6995	-+	NA	NA	NA	0.638	0.5234	???++++	0.638	0.5234	???++++	NA	NA	NA
3	ACY1	6	MISSLOF	TRUE	0.0001	20 (0)	8 (0)	1.26 [0.48-3.29]	0.63323	1.26 [0.48-3.29]	0.63323	NA	NA	0.287	0.7741	-+	0.287	0.7741	-+	NA	NA	NA	1.191	0.2335	+?+++++	1.191	0.2335	+?+++++	NA	NA	NA
3	ACY1	9	MISSLOF	FALSE	0.0001	27 (0)	10 (0)	1.34 [0.58-3.1]	0.49242	1.34 [0.58-3.1]	0.49242	NA	NA	0.715	0.4743	++	0.715	0.4743	++	NA	NA	NA	1.564	0.1178	+++++++	1.564	0.1178	+++++++	NA	NA	NA
3	ACY1	5	MISSLOF	TRUE	0.001	27 (0)	13 (0)	0.85 [0.39-1.85]	0.68628	0.85 [0.39-1.85]	0.68628	NA	NA	-0.437	0.662	-+	-0.437	0.662	-+	NA	NA	NA	0.472	0.6367	--+++++	0.472	0.6367	--+++++	NA	NA	NA
3	ACY1	8	MISSLOF	FALSE	0.001	41 (0)	19 (0)	0.97 [0.52-1.84]	0.9353	0.97 [0.52-1.84]	0.9353	NA	NA	-0.041	0.9672	-+	-0.041	0.9672	-+	NA	NA	NA	0.288	0.7732	--+-++-	0.288	0.7732	--+-++-	NA	NA	NA
3	ACY1	4	MISSLOF	TRUE	0.01	65 (0)	28 (0)	0.8 [0.47-1.36]	0.41852	0.8 [0.47-1.36]	0.41852	NA	NA	-0.699	0.4848	-+	-0.699	0.4848	-+	NA	NA	NA	0.006	0.9954	--++++-	0.006	0.9954	--++++-	NA	NA	NA
3	ACY1	7	MISSLOF	FALSE	0.01	127 (0)	50 (0)	0.99 [0.67-1.46]	0.95337	0.99 [0.67-1.46]	0.95337	NA	NA	0.068	0.946	+-	0.068	0.946	+-	NA	NA	NA	0.889	0.3738	--++++-	0.889	0.3738	--++++-	NA	NA	NA
11	ACY3	6	MISSLOF	TRUE	0.0001	15 (0)	12 (0)	0.51 [0.2-1.31]	0.16592	0.51 [0.2-1.31]	0.16592	NA	NA	-1.641	0.1008	--	-1.641	0.1008	--	NA	NA	NA	-1.927	0.05396	++--+--	-1.927	0.05396	++--+--	NA	NA	NA
11	ACY3	9	MISSLOF	FALSE	0.0001	19 (0)	15 (0)	0.54 [0.24-1.22]	0.14096	0.54 [0.24-1.22]	0.14096	NA	NA	-1.574	0.1154	-+	-1.574	0.1154	-+	NA	NA	NA	-1.828	0.06754	-+-----	-1.828	0.06754	-+-----	NA	NA	NA
11	ACY3	5	MISSLOF	TRUE	0.001	37 (0)	18 (0)	0.96 [0.49-1.88]	0.89814	0.96 [0.49-1.88]	0.89814	NA	NA	-0.246	0.8059	-+	-0.246	0.8059	-+	NA	NA	NA	-0.3	0.7639	++--+--	-0.3	0.7639	++--+--	NA	NA	NA
11	ACY3	8	MISSLOF	FALSE	0.001	41 (0)	21 (0)	0.9 [0.48-1.68]	0.74748	0.9 [0.48-1.68]	0.74748	NA	NA	-0.339	0.7344	-+	-0.339	0.7344	-+	NA	NA	NA	-0.282	0.7776	-+--+--	-0.282	0.7776	-+--+--	NA	NA	NA
11	ACY3	4	MISSLOF	TRUE	0.01	72 (0)	37 (1)	0.83 [0.52-1.32]	0.42678	0.86 [0.53-1.38]	0.52099	0 [0-1.9266E+162]	0.12491	-0.783	0.4337	-+	-0.641	0.5218	-+	-1.523	0.1277	-?	-1.016	0.3099	-+--+--	-0.938	0.3482	-+--+--	-1.192	0.2334	-??????
11	ACY3	7	MISSLOF	FALSE	0.01	86 (0)	42 (1)	0.86 [0.56-1.32]	0.48733	0.88 [0.57-1.37]	0.58228	0 [0-1.9266E+162]	0.12491	-0.727	0.467	-+	-0.598	0.5499	-+	-1.523	0.1277	-?	-0.443	0.658	-++-+--	-0.397	0.6915	-++-+--	-1.192	0.2334	-??????
14	ACYP1	6	MISSLOF	TRUE	0.0001	3 (0)	1 (0)	0.33 [0.03-3.78]	0.40768	0.33 [0.03-3.78]	0.40768	NA	NA	-0.182	0.8556	+-	-0.182	0.8556	+-	NA	NA	NA	0.229	0.819	?+?+??-	0.229	0.819	?+?+??-	NA	NA	NA
14	ACYP1	9	MISSLOF	FALSE	0.0001	3 (0)	1 (0)	0.33 [0.03-3.78]	0.40768	0.33 [0.03-3.78]	0.40768	NA	NA	-0.182	0.8556	+-	-0.182	0.8556	+-	NA	NA	NA	0.229	0.819	?+?+??-	0.229	0.819	?+?+??-	NA	NA	NA
14	ACYP1	5	MISSLOF	TRUE	0.001	10 (0)	2 (0)	2.13 [0.4-11.42]	0.35397	2.13 [0.4-11.42]	0.35397	NA	NA	0.844	0.3987	++	0.844	0.3987	++	NA	NA	NA	1.515	0.1298	?+?+-?-	1.515	0.1298	?+?+-?-	NA	NA	NA
14	ACYP1	8	MISSLOF	FALSE	0.001	10 (0)	2 (0)	2.13 [0.4-11.42]	0.35397	2.13 [0.4-11.42]	0.35397	NA	NA	0.844	0.3987	++	0.844	0.3987	++	NA	NA	NA	1.515	0.1298	?+?+-?-	1.515	0.1298	?+?+-?-	NA	NA	NA
14	ACYP1	4	MISSLOF	TRUE	0.01	10 (0)	2 (0)	2.13 [0.4-11.42]	0.35397	2.13 [0.4-11.42]	0.35397	NA	NA	0.844	0.3987	++	0.844	0.3987	++	NA	NA	NA	1.515	0.1298	?+?+-?-	1.515	0.1298	?+?+-?-	NA	NA	NA
14	ACYP1	7	MISSLOF	FALSE	0.01	10 (0)	2 (0)	2.13 [0.4-11.42]	0.35397	2.13 [0.4-11.42]	0.35397	NA	NA	0.844	0.3987	++	0.844	0.3987	++	NA	NA	NA	1.515	0.1298	?+?+-?-	1.515	0.1298	?+?+-?-	NA	NA	NA
2	ACYP2	6	MISSLOF	TRUE	0.0001	4 (0)	1 (0)	1.9 [0.15-23.47]	0.60723	1.9 [0.15-23.47]	0.60723	NA	NA	0.62	0.5352	++	0.62	0.5352	++	NA	NA	NA	0.059	0.9529	?++-??+	0.059	0.9529	?++-??+	NA	NA	NA
2	ACYP2	9	MISSLOF	FALSE	0.0001	4 (0)	1 (0)	1.9 [0.15-23.47]	0.60723	1.9 [0.15-23.47]	0.60723	NA	NA	0.62	0.5352	++	0.62	0.5352	++	NA	NA	NA	0.059	0.9529	?++-??+	0.059	0.9529	?++-??+	NA	NA	NA
2	ACYP2	5	MISSLOF	TRUE	0.001	7 (0)	4 (0)	0.59 [0.14-2.51]	0.48162	0.59 [0.14-2.51]	0.48162	NA	NA	-1.121	0.2625	-+	-1.121	0.2625	-+	NA	NA	NA	-0.274	0.7841	+-+-??+	-0.274	0.7841	+-+-??+	NA	NA	NA
2	ACYP2	8	MISSLOF	FALSE	0.001	7 (0)	4 (0)	0.59 [0.14-2.51]	0.48162	0.59 [0.14-2.51]	0.48162	NA	NA	-1.121	0.2625	-+	-1.121	0.2625	-+	NA	NA	NA	-0.274	0.7841	+-+-??+	-0.274	0.7841	+-+-??+	NA	NA	NA
2	ACYP2	4	MISSLOF	TRUE	0.01	11 (0)	11 (0)	0.44 [0.16-1.16]	0.097099	0.44 [0.16-1.16]	0.097099	NA	NA	-1.808	0.07065	--	-1.808	0.07065	--	NA	NA	NA	-1.116	0.2645	+-+-??+	-1.116	0.2645	+-+-??+	NA	NA	NA
2	ACYP2	7	MISSLOF	FALSE	0.01	11 (0)	11 (0)	0.44 [0.16-1.16]	0.097099	0.44 [0.16-1.16]	0.097099	NA	NA	-1.808	0.07065	--	-1.808	0.07065	--	NA	NA	NA	-1.116	0.2645	+-+-??+	-1.116	0.2645	+-+-??+	NA	NA	NA
20	ADA	6	MISSLOF	TRUE	0.0001	24 (1)	12 (0)	0.71 [0.32-1.59]	0.41103	0.7 [0.31-1.58]	0.39464	4643.6 [0-2.1341E+171]	0.76919	-0.665	0.5059	-+	-0.713	0.4761	-+	0.317	0.7511	+?	-0.829	0.4073	++---++	-0.829	0.4073	++---++	0.293	0.7696	??????+
20	ADA	9	MISSLOF	FALSE	0.0001	28 (1)	15 (0)	0.6 [0.29-1.26]	0.1879	0.59 [0.27-1.26]	0.17666	4643.6 [0-2.1341E+171]	0.76919	-1.175	0.24	-+	-1.219	0.2227	-+	0.317	0.7511	+?	-1.419	0.156	-+---++	-1.419	0.156	-+---++	0.293	0.7696	??????+
20	ADA	5	MISSLOF	TRUE	0.001	31 (1)	13 (0)	0.85 [0.4-1.79]	0.66567	0.84 [0.39-1.79]	0.65055	4643.6 [0-2.1341E+171]	0.76919	-0.28	0.7792	-+	-0.308	0.7577	-+	0.317	0.7511	+?	-0.387	0.6987	++---++	-0.387	0.6987	++---++	0.293	0.7696	??????+
20	ADA	8	MISSLOF	FALSE	0.001	37 (1)	16 (0)	0.78 [0.39-1.55]	0.4805	0.77 [0.38-1.55]	0.46707	4643.6 [0-2.1341E+171]	0.76919	-0.397	0.6915	-+	-0.421	0.6738	-+	0.317	0.7511	+?	-0.717	0.4733	++---++	-0.717	0.4733	++---++	0.293	0.7696	??????+
20	ADA	4	MISSLOF	TRUE	0.01	40 (1)	16 (0)	0.96 [0.49-1.88]	0.90419	0.95 [0.49-1.88]	0.89197	4643.6 [0-2.1341E+171]	0.76919	0.031	0.9756	-+	0.011	0.9913	-+	0.317	0.7511	+?	-0.621	0.5344	++----+	-0.621	0.5344	++----+	0.293	0.7696	??????+
20	ADA	7	MISSLOF	FALSE	0.01	46 (1)	19 (0)	0.88 [0.47-1.65]	0.69841	0.88 [0.47-1.65]	0.68635	4643.6 [0-2.1341E+171]	0.76919	-0.218	0.8278	-+	-0.236	0.8138	-+	0.317	0.7511	+?	-0.861	0.3893	++----+	-0.861	0.3893	++----+	0.293	0.7696	??????+
4	ADAD1	2	LOF	-	0.001	5 (0)	3 (0)	1.31 [0.29-6.03]	0.72533	1.31 [0.29-6.03]	0.72533	NA	NA	0.247	0.8049	-+	0.247	0.8049	-+	NA	NA	NA	0.646	0.5184	???+???	0.646	0.5184	???+???	NA	NA	NA
4	ADAD1	1	LOF	-	0.01	5 (0)	3 (0)	1.31 [0.29-6.03]	0.72533	1.31 [0.29-6.03]	0.72533	NA	NA	0.247	0.8049	-+	0.247	0.8049	-+	NA	NA	NA	0.646	0.5184	???+???	0.646	0.5184	???+???	NA	NA	NA
4	ADAD1	6	MISSLOF	TRUE	0.0001	23 (0)	10 (0)	0.84 [0.36-1.99]	0.69942	0.84 [0.36-1.99]	0.69942	NA	NA	-0.584	0.5595	--	-0.584	0.5595	--	NA	NA	NA	-0.301	0.7633	+-++-++	-0.301	0.7633	+-++-++	NA	NA	NA
4	ADAD1	9	MISSLOF	FALSE	0.0001	26 (0)	11 (0)	0.85 [0.38-1.91]	0.69939	0.85 [0.38-1.91]	0.69939	NA	NA	-0.599	0.5495	--	-0.599	0.5495	--	NA	NA	NA	-0.222	0.8243	+-++-++	-0.222	0.8243	+-++-++	NA	NA	NA
4	ADAD1	5	MISSLOF	TRUE	0.001	35 (0)	22 (0)	0.74 [0.39-1.38]	0.33956	0.74 [0.39-1.38]	0.33956	NA	NA	-0.897	0.3695	--	-0.897	0.3695	--	NA	NA	NA	-0.701	0.4833	+-+--++	-0.701	0.4833	+-+--++	NA	NA	NA
4	ADAD1	8	MISSLOF	FALSE	0.001	41 (0)	25 (0)	0.68 [0.38-1.22]	0.20414	0.68 [0.38-1.22]	0.20414	NA	NA	-1.251	0.2109	--	-1.251	0.2109	--	NA	NA	NA	-1.173	0.2407	--+--++	-1.173	0.2407	--+--++	NA	NA	NA
4	ADAD1	4	MISSLOF	TRUE	0.01	40 (0)	26 (0)	0.7 [0.4-1.25]	0.2327	0.7 [0.4-1.25]	0.2327	NA	NA	-1.144	0.2527	--	-1.144	0.2527	--	NA	NA	NA	-0.915	0.3602	+-+--++	-0.915	0.3602	+-+--++	NA	NA	NA
4	ADAD1	7	MISSLOF	FALSE	0.01	46 (0)	29 (0)	0.66 [0.39-1.14]	0.13976	0.66 [0.39-1.14]	0.13976	NA	NA	-1.471	0.1414	--	-1.471	0.1414	--	NA	NA	NA	-1.383	0.1668	--+--++	-1.383	0.1668	--+--++	NA	NA	NA
16	ADAD2	3	LOF	-	0.0001	3 (0)	0 (0)	50813 [0-7.8061E+162]	0.32013	50813 [0-7.8061E+162]	0.32013	NA	NA	1.143	0.2532	++	1.143	0.2532	++	NA	NA	NA	0.774	0.4387	???++?+	0.774	0.4387	???++?+	NA	NA	NA
16	ADAD2	2	LOF	-	0.001	3 (0)	0 (0)	50813 [0-7.8061E+162]	0.32013	50813 [0-7.8061E+162]	0.32013	NA	NA	1.143	0.2532	++	1.143	0.2532	++	NA	NA	NA	0.774	0.4387	???++?+	0.774	0.4387	???++?+	NA	NA	NA
16	ADAD2	1	LOF	-	0.01	3 (0)	0 (0)	50813 [0-7.8061E+162]	0.32013	50813 [0-7.8061E+162]	0.32013	NA	NA	1.143	0.2532	++	1.143	0.2532	++	NA	NA	NA	0.774	0.4387	???++?+	0.774	0.4387	???++?+	NA	NA	NA
16	ADAD2	6	MISSLOF	TRUE	0.0001	38 (0)	21 (0)	0.64 [0.35-1.18]	0.16088	0.64 [0.35-1.18]	0.16088	NA	NA	-1.348	0.1777	--	-1.348	0.1777	--	NA	NA	NA	-0.476	0.6337	-++--++	-0.476	0.6337	-++--++	NA	NA	NA
16	ADAD2	9	MISSLOF	FALSE	0.0001	50 (0)	26 (0)	0.69 [0.4-1.19]	0.18921	0.69 [0.4-1.19]	0.18921	NA	NA	-1.179	0.2385	--	-1.179	0.2385	--	NA	NA	NA	-0.332	0.7401	-++--++	-0.332	0.7401	-++--++	NA	NA	NA
16	ADAD2	5	MISSLOF	TRUE	0.001	67 (1)	27 (0)	0.88 [0.53-1.47]	0.62832	0.86 [0.51-1.44]	0.56062	50742 [0-2.3319E+172]	0.37647	0.408	0.683	+-	0.507	0.6123	+-	0.841	0.4001	+?	0.144	0.8855	-++--++	0.132	0.895	-++--++	0.687	0.4921	??????+
16	ADAD2	8	MISSLOF	FALSE	0.001	126 (1)	49 (0)	0.91 [0.62-1.34]	0.62087	0.89 [0.6-1.32]	0.57153	50742 [0-2.3319E+172]	0.37647	0.47	0.6382	++	0.536	0.5919	++	0.841	0.4001	+?	0.073	0.942	-+--+++	0.055	0.956	-+--+++	0.687	0.4921	??????+
16	ADAD2	4	MISSLOF	TRUE	0.01	170 (2)	64 (1)	0.97 [0.69-1.37]	0.87429	0.97 [0.68-1.37]	0.84473	1.61 [0.07-35.17]	0.76044	0.039	0.969	+-	-0.012	0.9905	+-	0.539	0.5897	+-	1.014	0.3105	-+++++-	0.967	0.3336	-+++++-	-0.181	0.8563	???-??+
16	ADAD2	7	MISSLOF	FALSE	0.01	233 (2)	90 (1)	1 [0.74-1.33]	0.97393	0.99 [0.74-1.33]	0.94998	1.61 [0.07-35.17]	0.76044	0.152	0.8794	+-	0.112	0.9107	+-	0.539	0.5897	+-	0.852	0.3941	-+--++-	0.762	0.4461	-+--++-	-0.181	0.8563	???-??+
15	ADAL	3	LOF	-	0.0001	5 (0)	0 (0)	232620 [0-9.2848E+179]	0.081351	232620 [0-9.2848E+179]	0.081351	NA	NA	1.71	0.0873	++	1.71	0.0873	++	NA	NA	NA	1.709	0.08751	+??+++?	1.709	0.08751	+??+++?	NA	NA	NA
15	ADAL	2	LOF	-	0.001	5 (0)	0 (0)	232620 [0-9.2848E+179]	0.081351	232620 [0-9.2848E+179]	0.081351	NA	NA	1.71	0.0873	++	1.71	0.0873	++	NA	NA	NA	1.709	0.08751	+??+++?	1.709	0.08751	+??+++?	NA	NA	NA
15	ADAL	1	LOF	-	0.01	5 (0)	0 (0)	232620 [0-9.2848E+179]	0.081351	232620 [0-9.2848E+179]	0.081351	NA	NA	1.71	0.0873	++	1.71	0.0873	++	NA	NA	NA	1.709	0.08751	+??+++?	1.709	0.08751	+??+++?	NA	NA	NA
15	ADAL	6	MISSLOF	TRUE	0.0001	17 (0)	3 (0)	1.81 [0.49-6.71]	0.35288	1.81 [0.49-6.71]	0.35288	NA	NA	1.156	0.2478	+-	1.156	0.2478	+-	NA	NA	NA	0.996	0.3191	++++++-	0.996	0.3191	++++++-	NA	NA	NA
15	ADAL	9	MISSLOF	FALSE	0.0001	18 (0)	4 (0)	1.4 [0.44-4.48]	0.56242	1.4 [0.44-4.48]	0.56242	NA	NA	0.724	0.4691	+-	0.724	0.4691	+-	NA	NA	NA	1.303	0.1926	++++++-	1.303	0.1926	++++++-	NA	NA	NA
15	ADAL	5	MISSLOF	TRUE	0.001	17 (0)	3 (0)	1.81 [0.49-6.71]	0.35288	1.81 [0.49-6.71]	0.35288	NA	NA	1.156	0.2478	+-	1.156	0.2478	+-	NA	NA	NA	0.996	0.3191	++++++-	0.996	0.3191	++++++-	NA	NA	NA
15	ADAL	8	MISSLOF	FALSE	0.001	25 (0)	7 (0)	1.16 [0.45-3.03]	0.75722	1.16 [0.45-3.03]	0.75722	NA	NA	0.28	0.7795	+-	0.28	0.7795	+-	NA	NA	NA	0.139	0.8897	-++-++-	0.139	0.8897	-++-++-	NA	NA	NA
15	ADAL	4	MISSLOF	TRUE	0.01	43 (0)	7 (0)	2.11 [0.84-5.3]	0.095805	2.11 [0.84-5.3]	0.095805	NA	NA	1.729	0.08384	++	1.729	0.08384	++	NA	NA	NA	1.641	0.1009	+-+++++	1.641	0.1009	+-+++++	NA	NA	NA
15	ADAL	7	MISSLOF	FALSE	0.01	81 (0)	19 (1)	1.21 [0.67-2.17]	0.52277	1.3 [0.71-2.39]	0.39332	0 [0-2.4254E+162]	0.15169	0.668	0.5043	+-	0.896	0.3702	+-	-1.449	0.1474	-?	0.565	0.5724	+-+-+++	0.715	0.4745	+-+-+++	-1.34	0.1803	???-???
15	ADAM10	6	MISSLOF	TRUE	0.0001	12 (0)	3 (0)	2.91 [0.68-12.57]	0.13092	2.91 [0.68-12.57]	0.13092	NA	NA	0.301	0.7635	+-	0.301	0.7635	+-	NA	NA	NA	1.461	0.144	--+++++	1.461	0.144	--+++++	NA	NA	NA
15	ADAM10	9	MISSLOF	FALSE	0.0001	17 (0)	5 (0)	1.77 [0.55-5.67]	0.32508	1.77 [0.55-5.67]	0.32508	NA	NA	1.168	0.2428	+-	1.168	0.2428	+-	NA	NA	NA	1.174	0.2403	--+++++	1.174	0.2403	--+++++	NA	NA	NA
15	ADAM10	5	MISSLOF	TRUE	0.001	17 (0)	6 (0)	1.35 [0.46-4]	0.58335	1.35 [0.46-4]	0.58335	NA	NA	0.462	0.644	+-	0.462	0.644	+-	NA	NA	NA	0.537	0.5911	--+++++	0.537	0.5911	--+++++	NA	NA	NA
15	ADAM10	8	MISSLOF	FALSE	0.001	27 (0)	11 (0)	0.84 [0.37-1.9]	0.68321	0.84 [0.37-1.9]	0.68321	NA	NA	-0.147	0.8835	+-	-0.147	0.8835	+-	NA	NA	NA	0.596	0.5511	---++++	0.596	0.5511	---++++	NA	NA	NA
15	ADAM10	4	MISSLOF	TRUE	0.01	32 (1)	17 (0)	0.83 [0.41-1.68]	0.61443	0.82 [0.41-1.68]	0.59512	6595.4 [0-3.0307E+171]	0.72766	-0.477	0.6331	--	-0.508	0.6116	--	0.349	0.727	+?	0.06	0.9519	--+-+++	0.06	0.9519	--+-+++	0.299	0.7651	????+??
15	ADAM10	7	MISSLOF	FALSE	0.01	42 (1)	22 (0)	0.71 [0.39-1.31]	0.2814	0.7 [0.38-1.3]	0.2682	6595.4 [0-3.0307E+171]	0.72766	-0.89	0.3735	--	-0.918	0.3586	--	0.349	0.727	+?	0.127	0.8991	-+--+++	0.127	0.8991	-+--+++	0.299	0.7651	????+??
17	ADAM11	3	LOF	-	0.0001	4 (0)	0 (0)	175030 [0-1.808E+199]	0.18245	175030 [0-1.808E+199]	0.18245	NA	NA	1.31	0.1902	+?	1.31	0.1902	+?	NA	NA	NA	1.378	0.1682	???++?+	1.378	0.1682	???++?+	NA	NA	NA
17	ADAM11	2	LOF	-	0.001	4 (0)	0 (0)	175030 [0-1.808E+199]	0.18245	175030 [0-1.808E+199]	0.18245	NA	NA	1.31	0.1902	+?	1.31	0.1902	+?	NA	NA	NA	1.378	0.1682	???++?+	1.378	0.1682	???++?+	NA	NA	NA
17	ADAM11	1	LOF	-	0.01	4 (0)	0 (0)	175030 [0-1.808E+199]	0.18245	175030 [0-1.808E+199]	0.18245	NA	NA	1.31	0.1902	+?	1.31	0.1902	+?	NA	NA	NA	1.378	0.1682	???++?+	1.378	0.1682	???++?+	NA	NA	NA
17	ADAM11	6	MISSLOF	TRUE	0.0001	30 (0)	11 (1)	0.87 [0.4-1.86]	0.7185	0.98 [0.43-2.21]	0.95314	0 [0-1.3103E+162]	0.08729	-0.451	0.6519	-+	-0.187	0.8515	-+	-1.753	0.07954	-?	-0.117	0.907	+-++-+-	0.127	0.8987	+-++-+-	-2.334	0.0196	????-??
17	ADAM11	9	MISSLOF	FALSE	0.0001	39 (0)	16 (1)	0.81 [0.42-1.57]	0.5427	0.88 [0.44-1.75]	0.71901	0 [0-1.3103E+162]	0.08729	-0.795	0.4268	-+	-0.566	0.5712	-+	-1.753	0.07954	-?	-0.462	0.6439	+-+--+-	-0.218	0.8273	+-+--+-	-2.334	0.0196	????-??
17	ADAM11	5	MISSLOF	TRUE	0.001	43 (0)	14 (1)	0.97 [0.49-1.92]	0.9261	1.07 [0.52-2.21]	0.85369	0 [0-1.3103E+162]	0.08729	-0.278	0.7808	-+	0.906	0.365	++	-1.753	0.07954	-?	0.103	0.9178	+-++-+-	0.388	0.6981	+-++++-	-2.334	0.0196	????-??
17	ADAM11	8	MISSLOF	FALSE	0.001	58 (0)	20 (1)	0.88 [0.49-1.59]	0.68065	0.94 [0.51-1.73]	0.85372	0 [0-1.3103E+162]	0.08729	-0.656	0.5119	-+	1.08	0.2801	++	-1.753	0.07954	-?	-0.315	0.7524	--+-++-	-0.316	0.7522	--+-++-	-2.334	0.0196	????-??
17	ADAM11	4	MISSLOF	TRUE	0.01	66 (0)	32 (1)	0.88 [0.54-1.45]	0.62477	0.93 [0.56-1.54]	0.76503	0 [0-1.3103E+162]	0.08729	-0.442	0.6582	-+	-0.255	0.799	-+	-1.753	0.07954	-?	-0.171	0.8646	+-+--+-	0.014	0.989	+-+--+-	-2.334	0.0196	????-??
17	ADAM11	7	MISSLOF	FALSE	0.01	80 (0)	38 (1)	0.84 [0.53-1.33]	0.46706	0.88 [0.55-1.4]	0.57841	0 [0-1.3103E+162]	0.08729	-0.647	0.5174	-+	-0.479	0.6319	-+	-1.753	0.07954	-?	-0.349	0.7273	+-+--+-	-0.165	0.8691	+-+--+-	-2.334	0.0196	????-??
10	ADAM12	3	LOF	-	0.0001	3 (0)	0 (0)	41767 [0-1.9333E+153]	0.34116	41767 [0-1.9333E+153]	0.34116	NA	NA	0.89	0.3733	++	0.89	0.3733	++	NA	NA	NA	0.719	0.4721	???+?+?	0.719	0.4721	???+?+?	NA	NA	NA
10	ADAM12	2	LOF	-	0.001	3 (0)	0 (0)	41767 [0-1.9333E+153]	0.34116	41767 [0-1.9333E+153]	0.34116	NA	NA	0.89	0.3733	++	0.89	0.3733	++	NA	NA	NA	0.719	0.4721	???+?+?	0.719	0.4721	???+?+?	NA	NA	NA
10	ADAM12	1	LOF	-	0.01	3 (0)	0 (0)	41767 [0-1.9333E+153]	0.34116	41767 [0-1.9333E+153]	0.34116	NA	NA	0.89	0.3733	++	0.89	0.3733	++	NA	NA	NA	0.719	0.4721	???+?+?	0.719	0.4721	???+?+?	NA	NA	NA
10	ADAM12	6	MISSLOF	TRUE	0.0001	47 (0)	9 (0)	1.82 [0.83-4.01]	0.12139	1.82 [0.83-4.01]	0.12139	NA	NA	1.137	0.2554	+-	1.137	0.2554	+-	NA	NA	NA	1.444	0.1486	-+-++++	1.444	0.1486	-+-++++	NA	NA	NA
10	ADAM12	9	MISSLOF	FALSE	0.0001	64 (0)	19 (0)	1.24 [0.69-2.21]	0.46604	1.24 [0.69-2.21]	0.46604	NA	NA	0.832	0.4052	++	0.832	0.4052	++	NA	NA	NA	0.467	0.6402	-+-+-++	0.467	0.6402	-+-+-++	NA	NA	NA
10	ADAM12	5	MISSLOF	TRUE	0.001	77 (0)	15 (1)	1.48 [0.8-2.75]	0.19658	1.64 [0.87-3.1]	0.11581	0 [0-8.2607E+161]	0.055696	1.545	0.1223	++	1.838	0.06613	++	-1.952	0.05095	-?	1.699	0.08931	++++-++	1.975	0.04827	+++++++	-1.021	0.3073	????-??
10	ADAM12	8	MISSLOF	FALSE	0.001	108 (0)	29 (1)	1.18 [0.74-1.89]	0.48346	1.25 [0.77-2.01]	0.36302	0 [0-8.2607E+161]	0.055696	0.576	0.5648	++	0.782	0.4343	++	-1.952	0.05095	-?	0.918	0.3587	++-+-++	0.979	0.3273	++-+-++	-1.021	0.3073	????-??
10	ADAM12	4	MISSLOF	TRUE	0.01	92 (0)	20 (1)	1.4 [0.81-2.41]	0.21234	1.51 [0.87-2.63]	0.13542	0 [0-8.2607E+161]	0.055696	1.589	0.112	++	1.846	0.06484	++	-1.952	0.05095	-?	1.732	0.08323	++++-++	1.846	0.06483	+++++++	-1.021	0.3073	????-??
10	ADAM12	7	MISSLOF	FALSE	0.01	141 (1)	35 (1)	1.31 [0.86-1.99]	0.20433	1.36 [0.88-2.09]	0.15694	0.27 [0.02-4.55]	0.37866	1.12	0.2625	++	1.321	0.1865	++	-1.299	0.1941	-+	1.061	0.2885	++-+-++	1.058	0.29	++-+-++	-0.093	0.9262	+???-??
1	ADAM15	3	LOF	-	0.0001	3 (0)	2 (0)	1.18 [0.16-8.72]	0.86845	1.18 [0.16-8.72]	0.86845	NA	NA	0.384	0.7012	-+	0.384	0.7012	-+	NA	NA	NA	0.792	0.4283	??-+???	0.792	0.4283	??-+???	NA	NA	NA
1	ADAM15	2	LOF	-	0.001	4 (0)	2 (0)	1.94 [0.3-12.61]	0.47767	1.94 [0.3-12.61]	0.47767	NA	NA	0.398	0.6908	-+	0.398	0.6908	-+	NA	NA	NA	1.308	0.1907	??-+???	1.308	0.1907	??-+???	NA	NA	NA
1	ADAM15	1	LOF	-	0.01	4 (0)	2 (0)	1.94 [0.3-12.61]	0.47767	1.94 [0.3-12.61]	0.47767	NA	NA	0.398	0.6908	-+	0.398	0.6908	-+	NA	NA	NA	1.308	0.1907	??-+???	1.308	0.1907	??-+???	NA	NA	NA
1	ADAM15	6	MISSLOF	TRUE	0.0001	39 (0)	26 (0)	0.49 [0.28-0.88]	0.017723	0.49 [0.28-0.88]	0.017723	NA	NA	-2.266	0.02343	--	-2.266	0.02343	--	NA	NA	NA	-1.986	0.04702	-----++	-1.986	0.04702	-----++	NA	NA	NA
1	ADAM15	9	MISSLOF	FALSE	0.0001	50 (0)	29 (0)	0.56 [0.33-0.95]	0.033335	0.56 [0.33-0.95]	0.033335	NA	NA	-2.118	0.03422	--	-2.118	0.03422	--	NA	NA	NA	-1.713	0.08678	-----++	-1.713	0.08678	-----++	NA	NA	NA
1	ADAM15	5	MISSLOF	TRUE	0.001	70 (1)	33 (0)	0.84 [0.51-1.37]	0.48515	0.84 [0.51-1.37]	0.47905	3287.2 [0-1.5107E+171]	0.8044	-0.46	0.6455	+-	-0.607	0.5438	--	0.291	0.7713	+?	0.13	0.8962	+---+++	0.147	0.8832	+---+++	0.182	0.8557	+??????
1	ADAM15	8	MISSLOF	FALSE	0.001	84 (1)	37 (0)	0.88 [0.56-1.39]	0.58031	0.88 [0.55-1.39]	0.57449	3287.2 [0-1.5107E+171]	0.8044	0.025	0.9801	+-	0.037	0.9708	+-	0.291	0.7713	+?	0.155	0.8766	+----++	0.168	0.8667	+----++	0.182	0.8557	+??????
1	ADAM15	4	MISSLOF	TRUE	0.01	145 (2)	54 (0)	0.99 [0.68-1.45]	0.95666	0.99 [0.67-1.45]	0.94478	11128 [0-5.9338E+198]	0.69548	-0.13	0.8967	+-	-0.149	0.8817	+-	0.459	0.6461	+?	0.194	0.8465	--+-+++	0.179	0.8577	--+-+++	0.239	0.8114	+?+????
1	ADAM15	7	MISSLOF	FALSE	0.01	159 (2)	58 (0)	1 [0.7-1.45]	0.98086	1 [0.69-1.45]	0.99202	11128 [0-5.9338E+198]	0.69548	0.044	0.9653	++	0.024	0.9806	++	0.459	0.6461	+?	0.267	0.7894	--+--++	0.255	0.7988	--+--++	0.239	0.8114	+?+????
2	ADAM17	6	MISSLOF	TRUE	0.0001	20 (0)	14 (0)	0.65 [0.29-1.5]	0.3197	0.65 [0.29-1.5]	0.3197	NA	NA	-1.167	0.2432	--	-1.167	0.2432	--	NA	NA	NA	-0.539	0.5901	++--+++	-0.539	0.5901	++--+++	NA	NA	NA
2	ADAM17	9	MISSLOF	FALSE	0.0001	26 (0)	17 (0)	0.6 [0.28-1.26]	0.18113	0.6 [0.28-1.26]	0.18113	NA	NA	-1.425	0.1541	--	-1.425	0.1541	--	NA	NA	NA	-0.637	0.5241	++--+++	-0.637	0.5241	++--+++	NA	NA	NA
2	ADAM17	5	MISSLOF	TRUE	0.001	35 (1)	20 (0)	0.76 [0.4-1.45]	0.40925	0.73 [0.38-1.43]	0.36704	20104 [0-9.2387E+171]	0.55505	-1.007	0.3141	--	-1.072	0.2837	--	0.546	0.5849	+?	-0.523	0.6007	----+++	-0.523	0.6007	----+++	0.389	0.697	?????+?
2	ADAM17	8	MISSLOF	FALSE	0.001	46 (1)	26 (0)	0.76 [0.43-1.35]	0.35509	0.74 [0.41-1.34]	0.32072	20104 [0-9.2387E+171]	0.55505	-1.129	0.2588	--	-1.184	0.2366	--	0.546	0.5849	+?	-0.57	0.5685	----+++	-0.57	0.5685	----+++	0.389	0.697	?????+?
2	ADAM17	4	MISSLOF	TRUE	0.01	66 (1)	41 (0)	0.72 [0.45-1.15]	0.1787	0.71 [0.44-1.14]	0.16089	20104 [0-9.2387E+171]	0.55505	-1.393	0.1637	--	-1.447	0.1479	--	0.546	0.5849	+?	-0.806	0.4202	----+++	-0.806	0.4202	----+++	0.389	0.697	?????+?
2	ADAM17	7	MISSLOF	FALSE	0.01	124 (1)	62 (0)	0.86 [0.6-1.25]	0.43921	0.86 [0.59-1.24]	0.41797	20104 [0-9.2387E+171]	0.55505	-0.923	0.3561	--	-0.957	0.3384	--	0.546	0.5849	+?	-0.341	0.7332	-----++	-0.341	0.7332	-----++	0.389	0.697	?????+?
8	ADAM18	3	LOF	-	0.0001	6 (0)	2 (0)	0.83 [0.11-6.07]	0.85868	0.83 [0.11-6.07]	0.85868	NA	NA	-0.112	0.9109	+-	-0.112	0.9109	+-	NA	NA	NA	-0.238	0.8121	?+?--??	-0.238	0.8121	?+?--??	NA	NA	NA
8	ADAM18	2	LOF	-	0.001	26 (0)	14 (0)	0.46 [0.21-0.99]	0.053297	0.46 [0.21-0.99]	0.053297	NA	NA	-2.408	0.01603	--	-2.408	0.01603	--	NA	NA	NA	-1.571	0.1162	+++--+?	-1.571	0.1162	+++--+?	NA	NA	NA
8	ADAM18	1	LOF	-	0.01	26 (0)	15 (0)	0.41 [0.2-0.87]	0.023644	0.41 [0.2-0.87]	0.023644	NA	NA	-2.722	0.006484	--	-2.722	0.006484	--	NA	NA	NA	-2.032	0.04216	+++--+?	-2.032	0.04216	+++--+?	NA	NA	NA
8	ADAM18	6	MISSLOF	TRUE	0.0001	35 (0)	18 (0)	0.66 [0.34-1.28]	0.22674	0.66 [0.34-1.28]	0.22674	NA	NA	-0.955	0.3394	+-	-0.955	0.3394	+-	NA	NA	NA	-1.191	0.2337	+++--+-	-1.191	0.2337	+++--+-	NA	NA	NA
8	ADAM18	9	MISSLOF	FALSE	0.0001	40 (0)	22 (0)	0.58 [0.31-1.06]	0.081569	0.58 [0.31-1.06]	0.081569	NA	NA	-0.706	0.48	+-	-0.706	0.48	+-	NA	NA	NA	-1.552	0.1206	+++--+-	-1.552	0.1206	+++--+-	NA	NA	NA
8	ADAM18	5	MISSLOF	TRUE	0.001	68 (0)	34 (0)	0.63 [0.39-1.03]	0.067343	0.63 [0.39-1.03]	0.067343	NA	NA	-2.142	0.03218	--	-2.142	0.03218	--	NA	NA	NA	-1.476	0.1399	+++--+-	-1.476	0.1399	+++--+-	NA	NA	NA
8	ADAM18	8	MISSLOF	FALSE	0.001	91 (0)	50 (0)	0.56 [0.37-0.84]	0.0059181	0.56 [0.37-0.84]	0.0059181	NA	NA	-2.937	0.003318	--	-2.937	0.003318	--	NA	NA	NA	-2.614	0.008961	-++----	-2.614	0.008961	-++----	NA	NA	NA
8	ADAM18	4	MISSLOF	TRUE	0.01	156 (1)	64 (0)	0.72 [0.5-1.02]	0.066653	0.71 [0.5-1.01]	0.063504	9240.2 [0-4.2468E+171]	0.6822	-2.151	0.0315	--	-2.177	0.02946	--	0.467	0.6405	+?	-2.282	0.02247	+-+---+	-2.282	0.02247	+-+---+	NA	NA	NA
8	ADAM18	7	MISSLOF	FALSE	0.01	263 (1)	113 (0)	0.71 [0.54-0.92]	0.01201	0.7 [0.54-0.92]	0.011478	9240.2 [0-4.2468E+171]	0.6822	0.067	0.9467	+-	0.086	0.9316	+-	0.467	0.6405	+?	-2.686	0.007233	--+--++	-2.686	0.007233	--+--++	NA	NA	NA
5	ADAM19	3	LOF	-	0.0001	4 (0)	1 (0)	1.48 [0.13-17]	0.74601	1.48 [0.13-17]	0.74601	NA	NA	0.675	0.4994	+-	0.675	0.4994	+-	NA	NA	NA	0.255	0.7987	???+++?	0.255	0.7987	???+++?	NA	NA	NA
5	ADAM19	2	LOF	-	0.001	4 (0)	1 (0)	1.48 [0.13-17]	0.74601	1.48 [0.13-17]	0.74601	NA	NA	0.675	0.4994	+-	0.675	0.4994	+-	NA	NA	NA	0.255	0.7987	???+++?	0.255	0.7987	???+++?	NA	NA	NA
5	ADAM19	1	LOF	-	0.01	4 (0)	1 (0)	1.48 [0.13-17]	0.74601	1.48 [0.13-17]	0.74601	NA	NA	0.675	0.4994	+-	0.675	0.4994	+-	NA	NA	NA	0.255	0.7987	???+++?	0.255	0.7987	???+++?	NA	NA	NA
5	ADAM19	6	MISSLOF	TRUE	0.0001	18 (0)	4 (0)	1.67 [0.51-5.45]	0.37907	1.67 [0.51-5.45]	0.37907	NA	NA	0.754	0.4506	+-	0.754	0.4506	+-	NA	NA	NA	0.158	0.8746	?-+++-+	0.158	0.8746	?-+++-+	NA	NA	NA
5	ADAM19	9	MISSLOF	FALSE	0.0001	50 (0)	15 (0)	1.64 [0.86-3.13]	0.12494	1.64 [0.86-3.13]	0.12494	NA	NA	1.314	0.1889	+-	1.314	0.1889	+-	NA	NA	NA	1.162	0.2452	+++++--	1.162	0.2452	+++++--	NA	NA	NA
5	ADAM19	5	MISSLOF	TRUE	0.001	28 (0)	8 (0)	1.54 [0.64-3.7]	0.31788	1.54 [0.64-3.7]	0.31788	NA	NA	1.035	0.3007	++	1.035	0.3007	++	NA	NA	NA	0.486	0.6268	?-+++-+	0.486	0.6268	?-+++-+	NA	NA	NA
5	ADAM19	8	MISSLOF	FALSE	0.001	79 (0)	26 (0)	1.42 [0.86-2.36]	0.16111	1.42 [0.86-2.36]	0.16111	NA	NA	1.503	0.1327	++	1.503	0.1327	++	NA	NA	NA	1.031	0.3026	++-++--	1.031	0.3026	++-++--	NA	NA	NA
5	ADAM19	4	MISSLOF	TRUE	0.01	36 (0)	13 (0)	1.37 [0.67-2.82]	0.38499	1.37 [0.67-2.82]	0.38499	NA	NA	1.118	0.2634	++	1.118	0.2634	++	NA	NA	NA	0.698	0.4854	?-+++-+	0.698	0.4854	?-+++-+	NA	NA	NA
5	ADAM19	7	MISSLOF	FALSE	0.01	276 (6)	108 (0)	0.82 [0.63-1.08]	0.16704	0.8 [0.6-1.05]	0.11164	195070 [0-1.5054E+167]	0.078157	1.307	0.1912	++	-1.483	0.1382	-+	1.701	0.08893	+?	-1.176	0.2395	+---+-+	-1.229	0.2191	+---+-+	0.556	0.5784	????++?
8	ADAM2	3	LOF	-	0.0001	4 (1)	0 (0)	214370 [0-2.5413E+182]	0.11932	373100 [0-5.8881E+232]	0.11932	11000 [0-5.055E+171]	0.65618	1.532	0.1255	+?	1.532	0.1255	+?	0.472	0.637	+?	1.502	0.133	???++?+	1.502	0.133	???++?+	0.601	0.5476	??????+
8	ADAM2	2	LOF	-	0.001	18 (1)	4 (0)	2.26 [0.67-7.59]	0.1618	2.26 [0.67-7.67]	0.1672	11000 [0-5.055E+171]	0.65618	1.3	0.1935	+-	1.288	0.1976	+-	0.472	0.637	+?	1.128	0.2594	???++++	1.128	0.2594	???++++	0.601	0.5476	??????+
8	ADAM2	1	LOF	-	0.01	109 (3)	34 (0)	1.54 [0.98-2.4]	0.053951	1.53 [0.97-2.4]	0.061881	50426 [0-6.3758E+158]	0.31402	1.519	0.1287	+-	1.506	0.1319	+-	0.994	0.3202	++	2.139	0.03247	+-?++++	2.12	0.03399	+-?++++	0.766	0.444	???+??+
8	ADAM2	6	MISSLOF	TRUE	0.0001	20 (1)	9 (0)	1.11 [0.42-2.91]	0.83881	1.09 [0.4-2.93]	0.87141	11000 [0-5.055E+171]	0.65618	-0.887	0.3749	--	-0.854	0.3929	--	0.472	0.637	+?	0.221	0.8252	?--+-?+	0.221	0.8252	?--+-?+	0.601	0.5476	??????+
8	ADAM2	9	MISSLOF	FALSE	0.0001	28 (1)	13 (0)	0.88 [0.4-1.91]	0.74567	0.86 [0.39-1.91]	0.71114	11000 [0-5.055E+171]	0.65618	-0.487	0.6261	+-	-1.353	0.1761	--	0.472	0.637	+?	-0.499	0.6176	-+---++	-0.499	0.6176	-+---++	0.601	0.5476	??????+
8	ADAM2	5	MISSLOF	TRUE	0.001	66 (1)	27 (0)	0.9 [0.52-1.54]	0.69444	0.89 [0.51-1.53]	0.67199	11000 [0-5.055E+171]	0.65618	-0.427	0.6693	+-	-0.452	0.6511	+-	0.472	0.637	+?	-0.926	0.3542	++-----	-1.015	0.31	++-----	0.601	0.5476	??????+
8	ADAM2	8	MISSLOF	FALSE	0.001	95 (1)	36 (0)	1.05 [0.66-1.65]	0.84625	1.04 [0.66-1.64]	0.86243	11000 [0-5.055E+171]	0.65618	-0.015	0.988	+-	-0.032	0.9745	+-	0.472	0.637	+?	-0.044	0.9651	++-+-+-	-0.132	0.8946	++-+-+-	0.601	0.5476	??????+
8	ADAM2	4	MISSLOF	TRUE	0.01	311 (9)	91 (1)	1.36 [1.03-1.79]	0.029582	1.37 [1.03-1.82]	0.029475	1.57 [0.19-13.26]	0.66394	1.908	0.05641	++	1.904	0.05686	++	0.563	0.5736	++	-0.302	0.7624	+--++--	-0.192	0.8476	+--++--	0.522	0.6014	?+?+??-
8	ADAM2	7	MISSLOF	FALSE	0.01	344 (9)	102 (1)	1.35 [1.04-1.76]	0.022219	1.36 [1.04-1.79]	0.022205	1.57 [0.19-13.26]	0.66394	1.981	0.04761	++	1.976	0.0482	++	0.563	0.5736	++	0.356	0.7217	+--+++-	0.475	0.635	+--+++-	0.522	0.6014	?+?+??-
14	ADAM20	3	LOF	-	0.0001	3 (0)	2 (0)	0.75 [0.08-6.96]	0.80514	0.75 [0.08-6.96]	0.80514	NA	NA	0.348	0.7275	+-	0.348	0.7275	+-	NA	NA	NA	-0.113	0.91	???-??+	-0.113	0.91	???-??+	NA	NA	NA
14	ADAM20	2	LOF	-	0.001	5 (0)	2 (0)	0.91 [0.11-7.23]	0.92615	0.91 [0.11-7.23]	0.92615	NA	NA	0.547	0.5841	+-	0.547	0.5841	+-	NA	NA	NA	0.036	0.9715	+??-??+	0.036	0.9715	+??-??+	NA	NA	NA
14	ADAM20	1	LOF	-	0.01	9 (0)	2 (0)	2.31 [0.41-13.11]	0.32075	2.31 [0.41-13.11]	0.32075	NA	NA	1.227	0.2196	+-	1.227	0.2196	+-	NA	NA	NA	1.03	0.3032	+??++?+	1.03	0.3032	+??++?+	NA	NA	NA
14	ADAM20	6	MISSLOF	TRUE	0.0001	32 (0)	10 (0)	1.31 [0.57-3]	0.51523	1.31 [0.57-3]	0.51523	NA	NA	0.65	0.5159	++	0.65	0.5159	++	NA	NA	NA	0.698	0.4849	++--+?-	0.698	0.4849	++--+?-	NA	NA	NA
14	ADAM20	9	MISSLOF	FALSE	0.0001	56 (2)	14 (0)	1.45 [0.74-2.85]	0.26641	1.45 [0.73-2.85]	0.27793	20068 [0-2.671E+199]	0.60239	1.093	0.2742	++	1.069	0.2853	++	0.524	0.6006	+?	1.158	0.2468	++-++--	1.088	0.2766	++-++--	0.305	0.7606	????++?
14	ADAM20	5	MISSLOF	TRUE	0.001	63 (1)	10 (0)	2.03 [0.96-4.31]	0.0509	2.03 [0.96-4.32]	0.051506	7589.8 [0-3.4878E+171]	0.70938	1.981	0.04762	++	1.978	0.04794	++	0.364	0.7155	+?	1.487	0.1371	+++-++-	1.487	0.1371	+++-++-	0.257	0.7975	?????+?
14	ADAM20	8	MISSLOF	FALSE	0.001	99 (2)	25 (0)	1.32 [0.79-2.2]	0.28847	1.31 [0.78-2.2]	0.29921	20068 [0-2.671E+199]	0.60239	1.178	0.2389	++	1.158	0.2469	++	0.524	0.6006	+?	1.23	0.2186	+++++++	1.221	0.2221	+++++++	0.305	0.7606	????++?
14	ADAM20	4	MISSLOF	TRUE	0.01	140 (2)	42 (1)	1.25 [0.84-1.87]	0.27143	1.28 [0.85-1.93]	0.23148	0.42 [0.02-7.82]	0.56964	1.242	0.2142	++	1.297	0.1945	++	-0.621	0.5346	-+	1.414	0.1575	++++--+	1.637	0.1017	+++++-+	-0.518	0.6046	????-+?
14	ADAM20	7	MISSLOF	FALSE	0.01	192 (3)	58 (1)	1.21 [0.85-1.72]	0.27852	1.23 [0.86-1.76]	0.24775	0.54 [0.04-8.07]	0.665	1.229	0.2189	++	1.261	0.2073	++	-0.351	0.7257	-+	1.364	0.1725	+++++-+	1.368	0.1714	+++++-+	-0.296	0.7674	????-+?
14	ADAM21	3	LOF	-	0.0001	4 (0)	4 (0)	0.13 [0.02-0.69]	0.018426	0.13 [0.02-0.69]	0.018426	NA	NA	-0.634	0.5263	+-	-0.634	0.5263	+-	NA	NA	NA	-1.724	0.08466	?+?-?++	-1.724	0.08466	?+?-?++	NA	NA	NA
14	ADAM21	2	LOF	-	0.001	5 (0)	4 (0)	0.27 [0.05-1.55]	0.15743	0.27 [0.05-1.55]	0.15743	NA	NA	0.015	0.9878	+-	0.015	0.9878	+-	NA	NA	NA	-0.92	0.3574	?+?-?++	-0.92	0.3574	?+?-?++	NA	NA	NA
14	ADAM21	1	LOF	-	0.01	5 (0)	4 (0)	0.27 [0.05-1.55]	0.15743	0.27 [0.05-1.55]	0.15743	NA	NA	0.015	0.9878	+-	0.015	0.9878	+-	NA	NA	NA	-0.92	0.3574	?+?-?++	-0.92	0.3574	?+?-?++	NA	NA	NA
14	ADAM21	6	MISSLOF	TRUE	0.0001	25 (0)	9 (0)	0.93 [0.38-2.29]	0.87641	0.93 [0.38-2.29]	0.87641	NA	NA	0.471	0.6374	+-	0.471	0.6374	+-	NA	NA	NA	0.372	0.7103	++?-+++	0.372	0.7103	++?-+++	NA	NA	NA
14	ADAM21	9	MISSLOF	FALSE	0.0001	41 (0)	12 (0)	1.13 [0.53-2.4]	0.74806	1.13 [0.53-2.4]	0.74806	NA	NA	0.851	0.3947	+-	0.851	0.3947	+-	NA	NA	NA	0.797	0.4257	++?-+++	0.797	0.4257	++?-+++	NA	NA	NA
14	ADAM21	5	MISSLOF	TRUE	0.001	46 (0)	16 (1)	0.78 [0.41-1.5]	0.46409	0.85 [0.43-1.68]	0.63467	0 [0-1.1028E+162]	0.073859	0.472	0.6368	+-	0.199	0.8424	+-	-1.824	0.06821	-?	-0.196	0.8447	++---+-	-0.035	0.9721	++---+-	-1.666	0.09572	????-??
14	ADAM21	8	MISSLOF	FALSE	0.001	81 (0)	30 (1)	0.95 [0.58-1.56]	0.84498	1 [0.6-1.66]	0.99429	0 [0-1.1028E+162]	0.073859	1.553	0.1205	++	1.357	0.1746	++	-1.824	0.06821	-?	0.395	0.6931	++---++	0.55	0.5826	++---++	-1.666	0.09572	????-??
14	ADAM21	4	MISSLOF	TRUE	0.01	126 (1)	27 (1)	1.6 [0.99-2.58]	0.047445	1.69 [1.04-2.76]	0.029281	0.22 [0.01-3.54]	0.30543	1.984	0.04724	++	2.185	0.02891	++	-1.079	0.2808	-?	0.992	0.3214	+++++++	1.208	0.227	+++++++	-1.261	0.2073	????-+?
14	ADAM21	7	MISSLOF	FALSE	0.01	230 (2)	58 (1)	1.18 [0.84-1.67]	0.33455	1.21 [0.85-1.72]	0.28275	0.36 [0.03-4.12]	0.44387	1.18	0.2378	++	1.279	0.2009	++	-0.763	0.4453	-?	0.138	0.8902	--+-+++	0.287	0.7742	--+-+++	-1.261	0.2073	????-+?
7	ADAM22	6	MISSLOF	TRUE	0.0001	3 (0)	1 (0)	0.28 [0.03-2.83]	0.33086	0.28 [0.03-2.83]	0.33086	NA	NA	0.982	0.326	+?	0.982	0.326	+?	NA	NA	NA	-1.77	0.07675	?+?-+??	-1.77	0.07675	?+?-+??	NA	NA	NA
7	ADAM22	9	MISSLOF	FALSE	0.0001	36 (1)	9 (0)	1.28 [0.56-2.92]	0.54972	1.27 [0.55-2.93]	0.5626	7350.9 [0-3.3781E+171]	0.71368	0.516	0.6056	++	0.496	0.6201	++	0.386	0.6992	+?	0.897	0.3697	--?+++-	0.798	0.4246	--?+++-	0.436	0.6631	??????+
7	ADAM22	5	MISSLOF	TRUE	0.001	6 (0)	1 (0)	1.28 [0.12-13.32]	0.83572	1.28 [0.12-13.32]	0.83572	NA	NA	0.119	0.905	+?	0.119	0.905	+?	NA	NA	NA	0.173	0.8625	?+?-+??	0.173	0.8625	?+?-+??	NA	NA	NA
7	ADAM22	8	MISSLOF	FALSE	0.001	84 (1)	17 (0)	1.36 [0.75-2.45]	0.29724	1.36 [0.75-2.45]	0.30305	7350.9 [0-3.3781E+171]	0.71368	1.006	0.3146	++	0.993	0.3209	++	0.386	0.6992	+?	1.091	0.2753	--?+++-	0.987	0.3236	--?+++-	0.436	0.6631	??????+
7	ADAM22	4	MISSLOF	TRUE	0.01	6 (0)	1 (0)	1.28 [0.12-13.32]	0.83572	1.28 [0.12-13.32]	0.83572	NA	NA	0.119	0.905	+?	0.119	0.905	+?	NA	NA	NA	0.173	0.8625	?+?-+??	0.173	0.8625	?+?-+??	NA	NA	NA
7	ADAM22	7	MISSLOF	FALSE	0.01	138 (1)	26 (0)	1.39 [0.85-2.26]	0.17519	1.39 [0.85-2.26]	0.17838	7350.9 [0-3.3781E+171]	0.71368	1.352	0.1764	++	1.342	0.1797	++	0.386	0.6992	+?	1.07	0.2845	++++++-	0.98	0.327	++++++-	0.436	0.6631	??????+
2	ADAM23	6	MISSLOF	TRUE	0.0001	24 (0)	17 (0)	0.6 [0.29-1.23]	0.16925	0.6 [0.29-1.23]	0.16925	NA	NA	-1.506	0.1321	--	-1.506	0.1321	--	NA	NA	NA	-1.684	0.09216	+------	-1.684	0.09216	+------	NA	NA	NA
2	ADAM23	9	MISSLOF	FALSE	0.0001	38 (0)	22 (0)	0.79 [0.43-1.44]	0.44573	0.79 [0.43-1.44]	0.44573	NA	NA	-0.865	0.3869	-+	-0.865	0.3869	-+	NA	NA	NA	-0.805	0.4205	+--+---	-0.805	0.4205	+--+---	NA	NA	NA
2	ADAM23	5	MISSLOF	TRUE	0.001	26 (0)	18 (0)	0.61 [0.3-1.22]	0.16491	0.61 [0.3-1.22]	0.16491	NA	NA	-1.545	0.1222	--	-1.545	0.1222	--	NA	NA	NA	-1.69	0.09095	+------	-1.69	0.09095	+------	NA	NA	NA
2	ADAM23	8	MISSLOF	FALSE	0.001	44 (0)	24 (0)	0.83 [0.47-1.47]	0.53271	0.83 [0.47-1.47]	0.53271	NA	NA	-0.714	0.4755	--	-0.714	0.4755	--	NA	NA	NA	-1.469	0.1419	+------	-1.469	0.1419	+------	NA	NA	NA
[truncated: 122,245 more rows]

## Sheet: Table S3
Table S3. Best results of the genome-wide burden analysis on rare variants under a co-dominant and dominant model
[truncated: 87 more rows]

## Sheet: Table S4
Table S4. TLR7 homo-/hemi-zygous variants (AF<0.01)
[truncated: 39 more rows]

[truncated: 8 more sheets: Table S5, Table S6, Table S7, Table S8, Table S9, Table S10, Table S11, Table S12]
